# Supplementary material
Source: PubMed Central journal article supplement (PMC5315221)
Supplement: NIHMS842601-supplement-Boyce_Supporting_Materials.pdf [file NIHMS842601-supplement-Boyce_Supporting_Materials.pdf]

## Supporting Information

Syntheses of (+)-30-*epi*-, (-)-6-*epi*-, (+/-)-6,30-*epi*-13,14-Didehydroxyisogarcinol and (+/-)-6,30-*epi*-Garcimultiflorone A Utilizing Highly Diastereoselective, Lewis Acid-Controlled Cyclizations

Jonathan H. Boyce, Vincent Eschenbrenner-Lux, and John A. Porco, Jr.\*

*Department of Chemistry and Center for Molecular Discovery (BU-CMD),  
Boston University, 590 Commonwealth Avenue, Boston, MA 02215  
Email: [porco@bu.edu](mailto:porco@bu.edu)*

### Table of Contents

|                                                                       |             |
|-----------------------------------------------------------------------|-------------|
| <b>I. GENERAL INFORMATION.....</b>                                    | <b>S2</b>   |
| <b>II. EXPERIMENTAL PROCEDURES AND COMPOUND CHARACTERIZATION.....</b> | <b>S4</b>   |
| <b>III. REFERENCES CITED.....</b>                                     | <b>S39</b>  |
| <b>IV. X-RAY CRYSTALLOGRAPHIC DATA.....</b>                           | <b>S40</b>  |
| <b>V. SELECT NMR SPECTRA.....</b>                                     | <b>S57</b>  |
| <b>VI. COMPUTATIONAL STUDIES.....</b>                                 | <b>S134</b> |

## I. General Information

### A. Instrumentation and Methods

$^1\text{H}$  NMR spectra were recorded at 400 MHz or 500 MHz at ambient temperature with  $\text{CDCl}_3$ , MeOD, or  $\text{CD}_3\text{CN}$  (Cambridge Isotope Laboratories, Inc.) as solvents unless otherwise stated. Data for  $^1\text{H}$  NMR are reported as follows: chemical shift, integration, multiplicity (app = apparent, br = broad, par obsc = partially obscure, ovrlp = overlapping, s = singlet, d = doublet, t = triplet, q = quartet, m = multiplet) and coupling constants.  $^{13}\text{C}$  NMR were recorded at 100 MHz or 125.0 MHz at ambient temperature with the same solvents unless otherwise stated. Chemical shifts are reported in parts per million relative to  $\text{CDCl}_3$  ( $^1\text{H}$ ,  $\delta$  7.26;  $^{13}\text{C}$ ,  $\delta$  77.0),  $\text{C}_6\text{D}_6$  ( $^1\text{H}$ ,  $\delta$  7.16),  $\text{DMSO-}d_6$  ( $^1\text{H}$ ,  $\delta$  2.50;  $^{13}\text{C}$   $\delta$  39.4),  $\text{CD}_3\text{OD}$  ( $^1\text{H}$ ,  $\delta$  3.31, 4.78;  $^{13}\text{C}$ ,  $\delta$  49.3) or  $\text{CD}_2\text{O}_2$  ( $^1\text{H}$ ,  $\delta$  10.35;  $^{13}\text{C}$   $\delta$  165.5). All  $^{13}\text{C}$  NMR spectra were recorded with complete proton decoupling. Infrared spectra were recorded on a Nicolet Nexus 670 FT-IR spectrophotometer. High-resolution mass spectra were obtained in the Boston University Chemical Instrumentation Center using a Waters Q-TOF mass spectrometer. Melting points were recorded on a Mel-temp (Laboratory Devices). Analytical thin layer chromatography was performed using 200-400 mesh silica gel (Scientific Absorbents, Inc.). Yields refer to chromatographically and spectroscopically pure materials, unless otherwise stated. All reactions were carried out in oven-dried glassware under an argon atmosphere unless otherwise noted. Analytical LC-MS experiments were performed using a Waters Acquity UPLC (Ultra Performance Liquid Chromatography) with a Binary solvent manager, SQ mass spectrometer, Water 2996 PDA (PhotoDiode Array) detector, and Evaporative Light Scattering Detector (ELSD). An Acquity UPLC BEH C18 1.7  $\mu\text{m}$  column was used for analytical UPLC-MS. Preparative HPLC purification was performed on a Gilson PLC 2020 Personal Purification System. Optical rotations were recorded on an AUTOPUL III digital polarimeter at 589 nm and are recorded as  $[\alpha]_D^{22}$  (concentration in grams/100 mL solvent). A CHIRALPAK® AD-H [Chiral Technologies Inc., 150 x 4.60 mm (L x I.D.)] column was used for enantiomeric excess determination. A Scilligence ELN was used for experimental procedure planning.

## **B. Reagents and Solvents**

HPLC grade tetrahydrofuran, methylene chloride, diethyl ether, toluene, acetonitrile, and benzene were purchased from Fisher and VWR and were purified and dried by passing through a PURE SOLV<sup>®</sup> solvent purification system (Innovative Technology, Inc.). Other ACS grade solvents for chromatography were purchased from Clean Harbors. All other reagents and relevant catalysts were purchased from Sigma-Aldrich, Acros, Alfa Aesar, and Strem Chemicals. Diisopropylamine was distilled over KOH before use. Phloroglucinol was purchased from Sigma-Aldrich. 3,3-Dimethylacrylate was purchased from eNovation Chemicals and (*R*)-4-benzyl-2-oxazolidinone was purchased from AK Scientific.

## II. Experimental Procedures and Compound Characterization

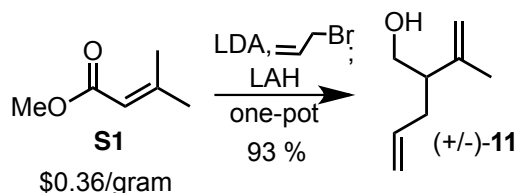

**2-(Prop-1-en-2-yl)pent-4-en-1-ol (+/-)-11:** Racemic alcohol (+/-)-**11** was prepared according to a known protocol;<sup>S1</sup> spectroscopic data for (+/-)-**11** were found to be identical with those reported in the literature.<sup>S1</sup>

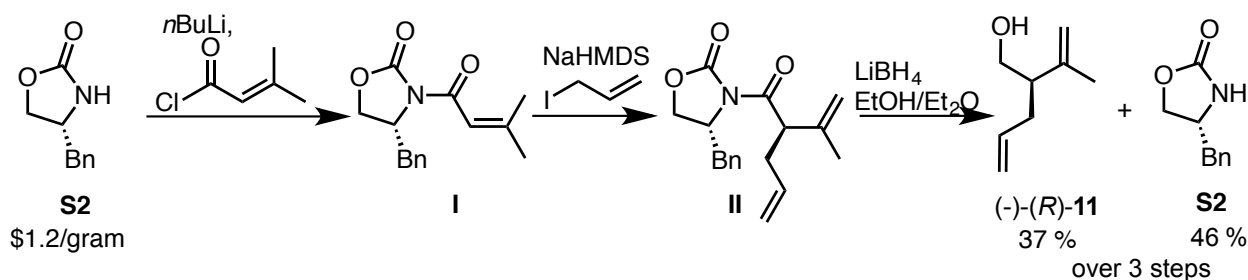

**(-)-(R)-2-(Prop-1-en-2-yl)pent-4-en-1-ol (-)-(R)-11:**<sup>S1,S2</sup> *n*-Butyllithium (82.7 mL, 2.5 M in THF) was added dropwise to a stirred solution of oxazolidinone **S2** (34.9 g, 197 mmol) in THF (643 mL). The orange reaction mixture was stirred for 10 min which was followed by dropwise addition of 3,3-dimethylacryloylchloride (23.7 mL, 213 mmol). The reaction mixture [now yellow in color] was warmed to 0 °C and then stirred for 30 min at which point TLC analysis indicated completion. Excess acid chloride was hydrolyzed by the addition of aqueous 1 M  $\text{K}_2\text{CO}_3$  (125 mL). The reaction was then warmed to room temperature and allowed to stir for 1.5 h. Water (100 mL) was added and THF was removed *in vacuo*. The aqueous solution was then poured into a separatory funnel and extracted with  $\text{CH}_2\text{Cl}_2$  (3 x 250 mL). The combined organic layers were washed with water (1 x 200 mL) and brine (1 x 200 mL), dried ( $\text{MgSO}_4$ ), filtered, and concentrated *in vacuo* to afford intermediate **I** (51.1 g, >98 % purity by  $^1\text{H}$  NMR analysis) as a white solid. Compound **I** was then dissolved in THF (656 mL), and the solution was cooled to -78 °C. A solution of NaHMDS (200 mL, 1.0 M in THF) was added dropwise via cannula, and

the reaction mixture was then stirred for 45 min. Allyl iodide (18 mL, 197 mmol) was added *via* syringe, and the reaction mixture was stirred for an additional 3 h. The reaction was then quenched with a saturated aqueous solution of NH<sub>4</sub>Cl (500 mL), warmed to room temperature, and extracted with Et<sub>2</sub>O (3 x 500 mL). The combined organic extracts were washed with water (1 x 500 mL) and brine (1 x 500 mL), dried (MgSO<sub>4</sub>), and concentrated *in vacuo* to provide a crude oil (50 g). Purification by column chromatography (silica gel, 2-9 % EtOAc/hexanes) afforded allylation adduct **II** as a crude oil (45.5 g, >65 % purity as determined by <sup>1</sup>H NMR analysis, product **II** **R<sub>f</sub>** = 0.54 and byproduct **R<sub>f</sub>** = 0.36 in 10 % EtOAc/pentane). Crude allylation adduct **II** was dissolved in Et<sub>2</sub>O (560 mL), and the solution was cooled to 0 °C. A solution of LiBH<sub>4</sub> (169 mL, 2.0 M in Et<sub>2</sub>O) was then added dropwise followed by EtOH (17.8 mL), and the reaction mixture was stirred at 0 °C for 1 h. The reaction was quenched with saturated aqueous NH<sub>4</sub>Cl (500 mL), poured into a separatory funnel, and extracted with Et<sub>2</sub>O (3 x 500 mL). The combined organic layers were then dried over MgSO<sub>4</sub>, filtered, and concentrated *in vacuo* to afford (-)-(R)-**11** as a crude oil. Purification by column chromatography (silica gel, 2-12 % EtOAc/hexanes) provided alcohol (-)-(R)-**11** (9.22 g, 37 % over three steps, >98 % purity as determined by <sup>1</sup>H NMR analysis) as a clear oil in >99 % ee as determined by chiral HPLC analysis of its benzoylated derivative (100 % hexanes using a Lux® 5u Cellulose-2 column).<sup>S1</sup> Oxazolidinone **S2** (16.0 g, 46 %) was also recovered and stored for future use. Spectroscopic data for (-)-(R)-**11** were found to be identical with those reported in the literature.<sup>S1</sup> Alcohol (-)-(R)-**11** was further dried by vacuum distillation (12.3 mm Hg, oil bath temperature: 95 °C, b.p. 61 °C) before use in subsequent reactions.

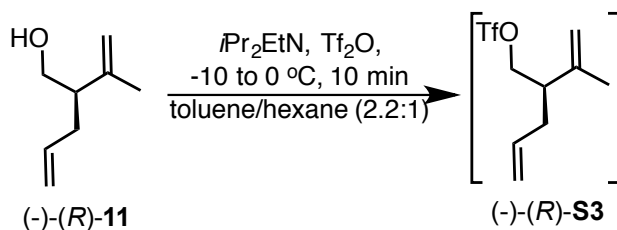

**Triflate (-)-(R)-S3:** To a flame-dried, 250-mL round-bottom flask under argon containing alcohol (-)-(R)-**11** (3.9 mL, 27.4 mmol) was added toluene (21.6 mL), hexane (48 mL), and diisopropylethylamine (6.0 mL, 34.5 mmol). The solution was cooled to -10 °C, and trifluoromethanesulfonic anhydride (4.19 mL, 24.9 mmol) was added dropwise over the course of 20 seconds. The reaction mixture was allowed to stir for 5 min before filtering under argon into

a 250-mL round-bottom flask using a custom-made 150-mL ChemGlass Büchner funnel with a 24/40 joint pictured in **Figure S1**. The fritted funnel was removed and quickly replaced with a septum and argon balloon. The clear solution of triflate (-)-(R)-**S3** was then used immediately in the next reaction (*vide infra*).

**Figure S1.** 150-mL ChemGlass Filtration Büchner Funnel with a 24/40 Joint

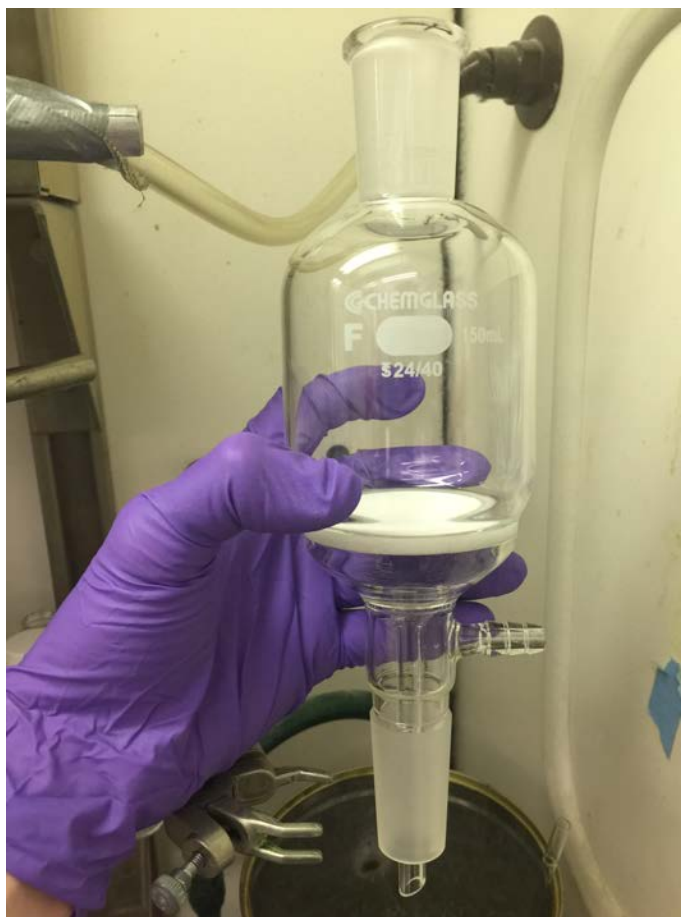

## Regioselective Alkylative Dearomatization

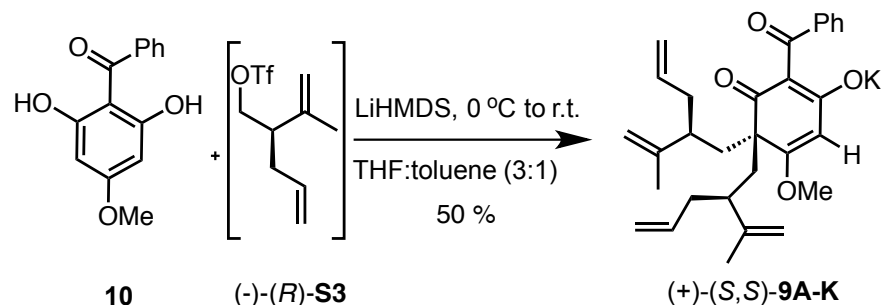

**(+)-2-Benzoyl-3-hydroxy-5-methoxy-6,6-bis((S)-2-(prop-1-en-2-yl)pent-4-en-1-yl)cyclohexa-2,4-dien-1-one (+)-(S,S)-9A-K:** To a flame-dried, round-bottom flask fitted with a stir bar was added acylphloroglucinol **10** (1.5 g, 6.14 mmol). The flask was charged with argon, THF (20.4 mL), and toluene (6.6 mL), and the solution was then cooled to 0 °C in an ice-water bath. LiHMDS (39 mL, 1.0 M in THF) was added over the course of 5 min, and the reaction mixture was allowed to stir until a homogeneous solution was formed. The solution of triflate (-)-(R)-S3 (7.07 g, 27.4 mmol) was then added to the reaction mixture *via* syringe over the course of 3 min. The reaction mixture was warmed to 20 °C in a water bath and stirred for 20 min. The water bath was removed and the reaction was warmed to room temperature and stirred for 4.5 h. The reaction mixture was quenched with 1 M HCl (300 mL), diluted with water (600 mL), and extracted into Et<sub>2</sub>O (3 x 300 mL). The combined organic layers were washed with 1 M HCl (1 x 400 mL), water (1 x 400 mL), and brine (1 x 300 mL), dried (Na<sub>2</sub>SO<sub>4</sub>), filtered, and concentrated *in vacuo* to provide a crude orange oil. Purification by the *General Purification Procedure for Dearomatized Phloroglucinols and PPAP Derivatives* (see below) provided potassium salt (+)-(S,S)-9A-K (1.53 g, 50 % from the first crop). Crops 2 and 3 provided impure potassium salt (+)-(S,S)-9A-K (134.6 mg, 4 %), which was further purified by dissolving in Et<sub>2</sub>O and triturating with pentane. The potassium salt (+)-(S,S)-9A-K was converted to enol (+)-(S,S)-9A with 97 % recovery *via* extraction with 1M HCl (*vide infra*).

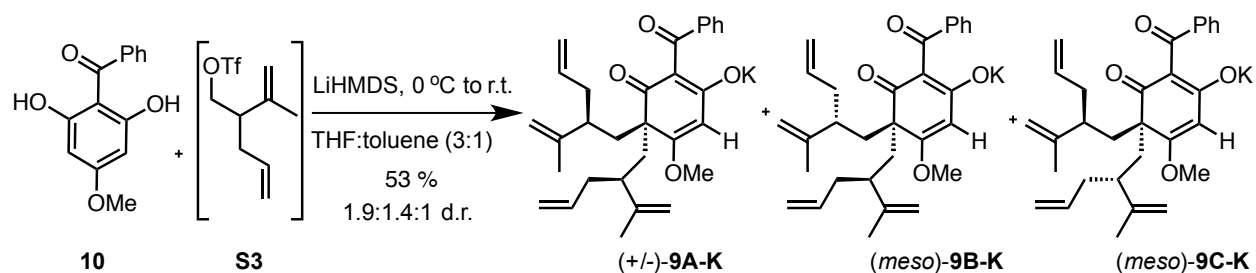

**2-Benzoyl-3-hydroxy-5-methoxy-6,6-bis(2-(prop-1-en-2-yl)pent-4-en-1-yl)cyclohexa-2,4-dien-1-one (+/-)-9A, (meso)-9B, and (meso)-9C:**<sup>S3</sup> Potassium salts (+/-)-9A-K, (meso)-9B-K, and (meso)-9C-K were prepared from acylphloroglucinol **10** (1.5 g, 6.14 mmol), LiHMDS (39 mL, 1.0 M in THF), and racemic triflate **S3** (7.07 g, 27.4 mmol) in the same manner described above for the preparation of potassium salt (+)-(S,S)-9A-K. Purification of the resulting crude oil by the *General Purification Procedure for Dearomatized Phloroglucinols and PPAP Derivatives* (see below) provided potassium salts (+/-)-9A-K, (meso)-9B-K, and (meso)-9C-K (1.62 g, 53 %, 1.9:1.4:1 d.r. as determined by <sup>1</sup>H NMR analysis). The potassium salts were converted to enols (+/-)-9A, (meso)-9B, and (meso)-9C with 97 % recovery *via* extraction with 1M HCl (*vide infra*).

### General Purification Procedure for Dearomatized Phloroglucinols and PPAP Derivatives:<sup>S1,S4</sup>

Pentane (150 mL) was added to the crude oil containing enol (+)-(S,S)-9A or enols (+/-)-9A, (meso)-9B, and (meso)-9C and was stirred vigorously for 30 min. The resulting solution was decanted to a separatory funnel and vigorously mixed with saturated aqueous K<sub>2</sub>CO<sub>3</sub> (40 mL). Water (10 mL) was then added to the biphasic mixture, and upon shaking vigorously, a precipitate crashed out of solution (**Figure S2**). The layers were separated, and the precipitate remained in the separatory funnel. The precipitate was rinsed with pentane to remove impurities and was then dissolved in acetone. Additional precipitate was obtained by repeating the extraction process with the initial crude pentane solution two additional times. The acetone solutions of precipitate were dried (Na<sub>2</sub>SO<sub>4</sub>), filtered, and concentrated *in vacuo* to provide potassium salt (+)-(S,S)-9A-K (1.53 g, 50 % from the first extraction) or potassium salts (+/-)-9A-K, (meso)-9B-K, and (meso)-9C-K (1.62 g, 53 %, 1.9:1.4:1 d.r. as determined by <sup>1</sup>H NMR analysis). If the 2<sup>nd</sup> and 3<sup>rd</sup> crops proved impure, the impure precipitates were further purified by dissolving in Et<sub>2</sub>O and triturating with pentane.



**Figure S2.** Potassium salts (+/-)-**9A-K**, (*meso*)-**9B-K**, and (*meso*)-**9C-K** Formed as Precipitates in the *General Purification Procedure for Dearomatized Phloroglucinols and PPAP Derivatives*.

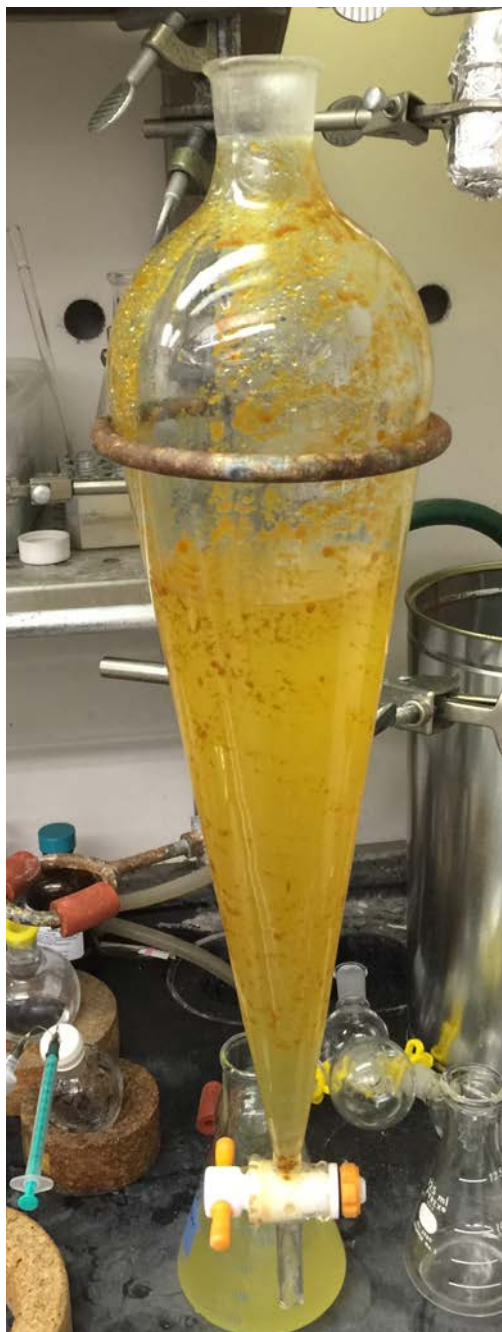

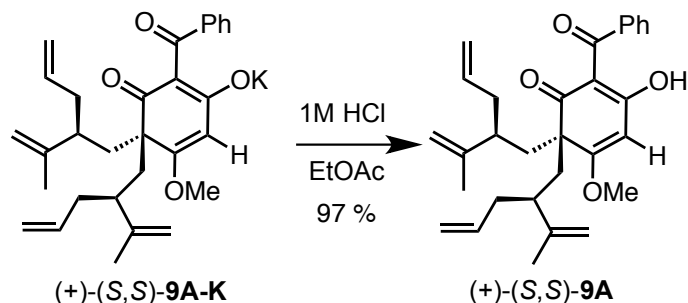

**General Procedure to Convert Potassium Salts to Enols with up to 97 % Recovery:** A solution of (+)-(S,S)-9A-K (510.1 mg) in EtOAc (30 mL) was extracted with 1M HCl (1 x 20 mL), washed with H<sub>2</sub>O (1 x 20 mL) and brine (1 x 20 mL), dried (Na<sub>2</sub>SO<sub>4</sub>), filtered, and concentrated *in vacuo* to provide enol (+)-(S,S)-9A (454.9 mg, 97 % yield) as a red solid.

[Enols (+/-)-9A (red solid), (*meso*)-9B (pink solid), and (*meso*)-9C (yellow oil) can be separated *via* preparative thin layer chromatography (silica gel, 3 elutions in 7 % EtOAc/hexanes with 1 % AcOH, Elution 1: 12 hours; Elution 2: 1 h, and Elution 3: 1 h).]

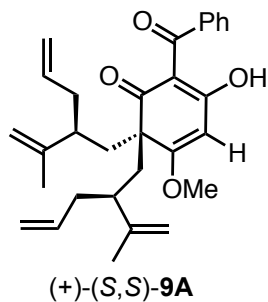

**(+)-2-Benzoyl-3-hydroxy-5-methoxy-6,6-bis((S)-2-(prop-1-en-2-yl)pent-4-en-1-yl)cyclohexa-2,4-dien-1-one (+)-(S,S)-9A:**  $R_f = 0.20$  (10 % EtOAc/hexanes); **m.p.** 79 – 84 °C (CH<sub>2</sub>Cl<sub>2</sub>); IR  $\nu_{\text{max}}$  3074, 2978, 2932, 2851, 1661, 1645, 1621, 1593, 1519, 1447, 1374, 1218, 1176, 913, 893, 835 cm<sup>-1</sup>; <sup>1</sup>H NMR (400 MHz, CDCl<sub>3</sub>, ~ 3:1 mixture of enol tautomers as determined by <sup>1</sup>H NMR analysis)  $\delta$  17.95 (s, 0.6H)\*, 17.28 (s, 0.2H)\*\*,

7.56 – 7.33 (m, 5H), 5.67 – 5.48 (m, 3H), 5.05 – 4.85 (m, 4H), 4.70 – 4.64 (m, 1.1H), 4.64 – 4.60 (m, 0.7H), 4.60 – 4.54 (m, 2.2H), 3.80 (s, 2.25H)\*, 3.69 (s, 0.75H)\*\*, 2.30 – 1.85 (m, 9H), 1.73 (dd,  $J = 13.3, 2.4$  Hz, 1H), 1.62 – 1.55 (m, 4H), 1.48 (s, 2H);

\*denotes conjugated enol tautomer (major)

\*\* denotes cross-conjugated enol tautomer (minor)

<sup>13</sup>C NMR (100 MHz, CDCl<sub>3</sub>, 3:1 mixture of enol tautomers as determined by <sup>1</sup>H NMR analysis)  $\delta$  197.0\*, 194.9\*\*, 193.5\*, 189.1\*, 188.1\*\*, 183.9\*\*, 178.3\*, 170.4\*\*, 146.6, 146.4, 146.2, 146.0, 139.3, 138.1, 136.6, 136.4, 136.4, 136.2, 131.6, 130.6, 128.3, 127.5, 127.4, 127.3, 127.3, 116.1, 115.9, 115.7, 113.3, 113.1, 112.1, 112.1, 108.6, 104.8, 98.3, 98.0, 56.6, 56.6, 55.7, 55.1, 52.1, 44.3, 43.9, 43.8, 43.5, 43.4, 42.6, 41.3, 40.4, 39.7, 39.4, 39.1, 18.3\*\*, 18.1\*, 17.7\*\*, 17.5\*;

**HR-MS:**  $m/z$  Calcd. for  $C_{30}H_{36}O_4$   $[M+H^+]$ : 461.2692, Found 461.2693;  $[\alpha]_D^{25} = +28.1$  (c. 0.250,  $CHCl_3$ ).

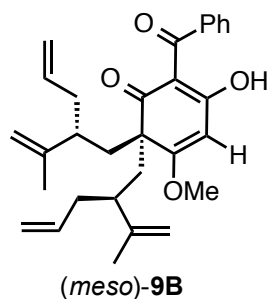

**[meso]-(r)-2-Benzoyl-3-hydroxy-5-methoxy-6-((R)-2-(prop-1-en-2-yl)pent-4-en-1-yl)-6-((S)-2-(prop-1-en-2-yl)pent-4-en-1-yl)cyclohexa-2,4-dien-1-one (meso)-9B:**  $R_f = 0.23$  (10 % EtOAc/hexanes); **m.p.** 81 – 84 °C ( $CH_2Cl_2$ ); IR  $\nu_{max}$  3072, 2977, 2934, 1658, 1644, 1618, 1590, 1519, 1446, 1373, 1288, 1218, 1177, 1114, 992, 912, 893, 831  $cm^{-1}$ ;  $^1H$  NMR (400 MHz,  $CDCl_3$ , ~ 5:1 mixture of enol tautomers as determined by  $^1H$

NMR analysis)  $\delta$  17.70 (s, 0.8H)\*, 17.04 (s, 0.1H)\*\*, 7.62 – 7.34 (m, 5H), 5.65 – 5.50 (m, 2H), 5.41 (s, 0.8H)\*, 5.35 (s, 0.2H)\*\*, 4.99 – 4.88 (m, 4H), 4.66 (app dd,  $J = 1.8, 1.4$  Hz, 2H), 4.57 (app d,  $J = 2.2$  Hz, 2H), 3.68 (s, 2.5H)\*, 3.57 (s, 0.5H)\*\*, 2.23 – 1.87 (m, 10H), 1.64 – 1.55 (m, 6H);

\*denotes conjugated enol tautomer (major)

\*\* denotes cross-conjugated enol tautomer (minor)

$^{13}C$  NMR (100 MHz,  $CDCl_3$ , ~ 5:1 mixture of enol tautomers as determined by  $^1H$  NMR analysis)  $\delta$  198.3\*\*, 197.6\*, 194.6\*, 193.6\*\*, 188.6\*, 183.7\*\*, 178.8\*, 170.6\*\*, 146.3, 146.2, 139.2, 138.3, 136.4, 136.2, 131.9, 131.1, 128.5, 127.7, 127.6, 127.6, 116.1, 115.7, 112.2, 112.0, 107.9, 104.6, 98.0, 57.0, 55.0, 54.5, 52.1, 44.2, 43.7, 42.9, 41.0, 39.6, 39.4, 18.3, 17.9; **HR-MS:**  $m/z$  Calcd. for  $C_{30}H_{36}O_4$  461.2692  $[M+H^+]$ : Found 461.2686.

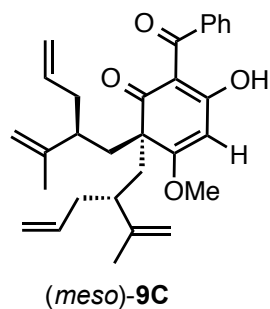

**[meso]-(s)-2-Benzoyl-3-hydroxy-5-methoxy-6-((R)-2-(prop-1-en-2-yl)pent-4-en-1-yl)-6-((S)-2-(prop-1-en-2-yl)pent-4-en-1-yl)cyclohexa-2,4-dien-1-one (meso)-9C:**  $R_f = 0.33$  (14 % EtOAc/hexanes); IR  $\nu_{max}$  3072, 2979, 2929, 2848, 1661, 1644, 1621, 1517, 1448, 1373, 1216, 1174, 1111, 992, 912, 890, 836  $cm^{-1}$ ;  $^1H$  NMR (400 MHz,  $CDCl_3$ , ~1.7:1

mixture of enol tautomers as determined by  $^1H$  NMR analysis)  $\delta$  18.11 (s, 0.5H)\*, 17.38 (s, 0.3H)\*\*, 7.54 – 7.32 (m, 5H), 5.74 (s, 0.6H)\*, 5.66 (s, 0.4H)\*\*, 5.65 – 5.52 (m, 2H), 5.03 – 4.90 (m, 4H), 4.62 (dd,  $J = 1.7, 1.7$  Hz, 1.3H), 4.57 (dd,  $J = 1.6, 1.6$  Hz, 2.7H), 3.91 (s, 1.9H)\*, 3.80 (s, 1.1H)\*\*, 2.25 (dd,  $J = 13.5, 7.9$  Hz, 1H), 2.18 – 1.88 (m, 8H), 1.72 (dd,  $J = 13.4, 2.4$  Hz, 1H), 1.59 (br s, 3H), 1.47 (br s, 3H);

\*denotes conjugated enol tautomer (major)

\*\* denotes cross-conjugated enol tautomer (minor)

$^{13}\text{C}$  NMR (100 MHz,  $\text{CDCl}_3$ ; ~1.7:1 mixture of enol tautomers as determined by  $^1\text{H}$  NMR analysis)  $\delta$  196.4, 195.9, 195.7, 192.4, 189.2, 183.9, 177.8, 170.3, 146.7, 146.1, 139.3, 138.1, 136.8, 136.6, 136.4, 131.4, 130.2, 129.0, 128.2, 127.5, 127.2, 127.1, 127.1, 115.9, 115.7, 113.1, 113.0, 109.5, 104.9, 98.7, 98.4, 65.8, 56.6, 56.3, 55.7, 52.3, 44.5, 44.0, 43.3, 40.8, 39.4, 39.2, 17.7, 17.6, 15.3; **HR-MS**:  $m/z$  Calcd. for  $\text{C}_{30}\text{H}_{36}\text{O}_4$   $[\text{M}+\text{H}^+]$ : 461.2692, Found 461.2680.

## Diastereoselective Oxycyclization Studies (Tables 1 and 2):

Table 1. Diastereoselective Oxycyclization and Chelation Studies.

| Entry           | Brønsted Acid                         | Lewis Acid                                     | Conditions           | Yield                          | d.r. (8:13) <sup>b</sup> |
|-----------------|---------------------------------------|------------------------------------------------|----------------------|--------------------------------|--------------------------|
| 1               | HCl <sup>a</sup>                      | none                                           | -10 °C to r.t., 72h  | 25% <sup>b</sup>               | 1:1.1                    |
| 2               | <b>19</b><br>(10 equiv)               | LiBr<br>(10 equiv)                             | 0 °C, 48 h           | 99%                            | 1:1.8                    |
| 3               | <b>18</b><br>(5 equiv)                | LiBr<br>(5 equiv)                              | r.t., 1.5 h          | 91%                            | 1:1.8                    |
| 4               | ( <i>R</i> )- <b>14</b><br>(10 equiv) | LiBr<br>(10 equiv)                             | 0 °C, 48 h           | 91%                            | 1:2                      |
| 5               | ( <i>S</i> )- <b>14</b><br>(10 equiv) | LiBr<br>(10 equiv)                             | 0 °C, 48 h           | 91%                            | 1:3                      |
| 6               | ( <i>R</i> )- <b>15</b><br>(5 equiv)  | LiBr<br>(5 equiv)                              | r.t., 48 h           | 89%                            | 1:2.2                    |
| 7               | ( <i>S</i> )- <b>15</b><br>(5 equiv)  | LiBr<br>(5 equiv)                              | r.t., 48 h           | 86%                            | 1:1.8                    |
| 8               | ( <i>S</i> )- <b>16</b><br>(10 equiv) | LiBr<br>(10 equiv)                             | 0 °C, 48 h           | 99%                            | 1:1.5                    |
| 9               | ( <i>S</i> )- <b>17</b><br>(1 equiv)  | SbCl <sub>5</sub><br>(1 equiv)                 | -78 °C, 2 h          | 18%                            | 9:1                      |
| 10              | ( <i>S</i> )- <b>14</b><br>(5 equiv)  | none                                           | -5 to 10 °C, 48 h    | 0%                             | none                     |
| 11              | none                                  | LiBr<br>(10 equiv)                             | r.t., 5 d            | 19%                            | 1:1.6                    |
| 12              | none                                  | SnCl <sub>4</sub><br>(2 equiv)                 | -78 to -20 °C, 48 h  | 36%                            | 7:1                      |
| 13 <sup>c</sup> | (+/-)- <b>14</b><br>(2 equiv)         | SnCl <sub>4</sub><br>(1 equiv)                 | -78 to 50 °C, 36 h   | 58%                            | 1:1.1                    |
| 14              | <i>p</i> TsOH<br>(10 equiv)           | BF <sub>3</sub> OEt <sub>2</sub><br>(79 equiv) | -78 to -5 °C,<br>1 h | 32% <sup>d</sup><br>(57% brsm) | 1:2                      |

<sup>a</sup>  $\text{CH}_2\text{Cl}_2/4\text{M HCl}$  in dioxane (1:1). <sup>b</sup> Determined by  $^1\text{H}$  NMR analysis of the crude reaction mixture. <sup>c</sup>  $\text{SnCl}_4$  saturated with (+/-)-**14** prior to addition of substrate (+)-(S,S)-**9A**. <sup>d</sup> 54 % starting material also recovered.

**Table 2.** Optimized Lewis/Brønsted Acid Combinations for Diastereoselective Cyclization.

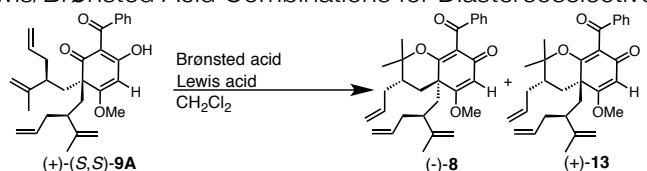

| Entry          | Brønsted Acid                        | Lewis Acid                        | Conditions                                    | Yield | d.r. ( <b>8:13</b> ) <sup>b</sup> |
|----------------|--------------------------------------|-----------------------------------|-----------------------------------------------|-------|-----------------------------------|
| 1              | ( <i>S</i> )- <b>14</b><br>(2 equiv) | SnCl <sub>4</sub><br>(2 equiv)    | -78 to -30 °C,<br>6 d                         | 68 %  | 14:1                              |
| 2              | ( <i>R</i> )- <b>14</b><br>(2 equiv) | SnCl <sub>4</sub><br>(2 equiv)    | -78 to -30 °C,<br>6 d                         | 9 %   | 1:0                               |
| 3 <sup>a</sup> | (+/-)- <b>14</b><br>(2 equiv)        | SnCl <sub>4</sub><br>(2 equiv)    | -78 to -20 °C,<br>17 h                        | 52 %  | 14:1                              |
| 4              | <b>18</b><br>(2 equiv)               | SnCl <sub>4</sub><br>(2 equiv)    | -78 to 0 °C,<br>19 h                          | 47 %  | 10:1                              |
| 5              | <b>18</b><br>(10 equiv)              | InCl <sub>3</sub><br>(10 equiv)   | r.t., 1 h                                     | 99 %  | 5.4:1                             |
| 6              | <i>p</i> TsOH<br>(10 equiv)          | BF <sub>3</sub> OEt<br>(79 equiv) | -15 to -5 °C,<br>2 h;<br>-40 to -5 °C,<br>2 h | 42 %  | 1:5                               |

<sup>a</sup> Substrate (+/-)-**9A** was used. <sup>b</sup> Determined by <sup>1</sup>H NMR analysis of the crude reaction mixture.

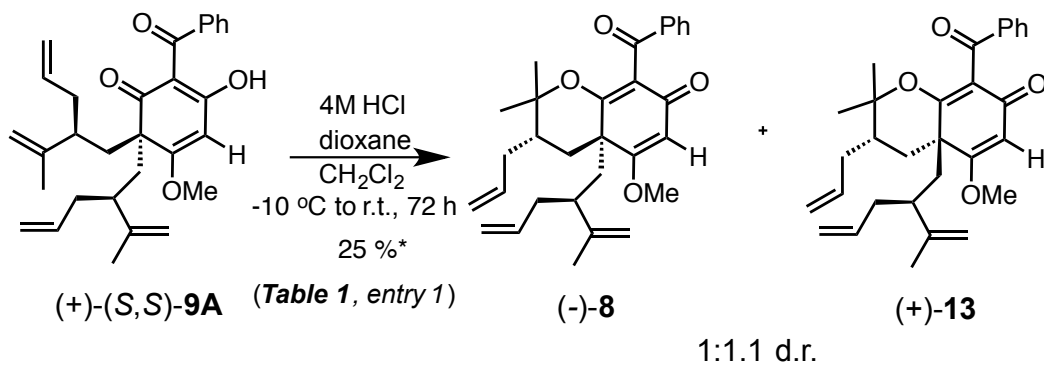

\*Yield determined by <sup>1</sup>H NMR analysis of the crude reaction mixture.

(Table 1, entry 1) To a flame-dried 10-mL round-bottom flask under an argon atmosphere containing enol (+)-(S,S)-**9A** (2.3 mg, 0.00499 mmol) was added CH<sub>2</sub>Cl<sub>2</sub> (0.33 mL). The solution was cooled to -10 °C, and 4 M HCl in dioxane (0.3 mL) was added. The reaction mixture was allowed to slowly warm to room temperature and was stirred for 72 h. The reaction was then quenched with saturated aqueous NaHCO<sub>3</sub> (2 mL), poured into water (2 mL), and extracted into CH<sub>2</sub>Cl<sub>2</sub> (3 x 4 mL). The combined organic layers were washed with water (1 x 5 mL) and brine (1 x 5 mL), dried (Na<sub>2</sub>SO<sub>4</sub>), filtered, and concentrated *in vacuo* to afford

oxycyclization products (+)-**13** and (-)-**8** (25 %, 1:1.1 d.r. based on <sup>1</sup>H NMR analysis of the crude reaction mixture).

### General Procedure A

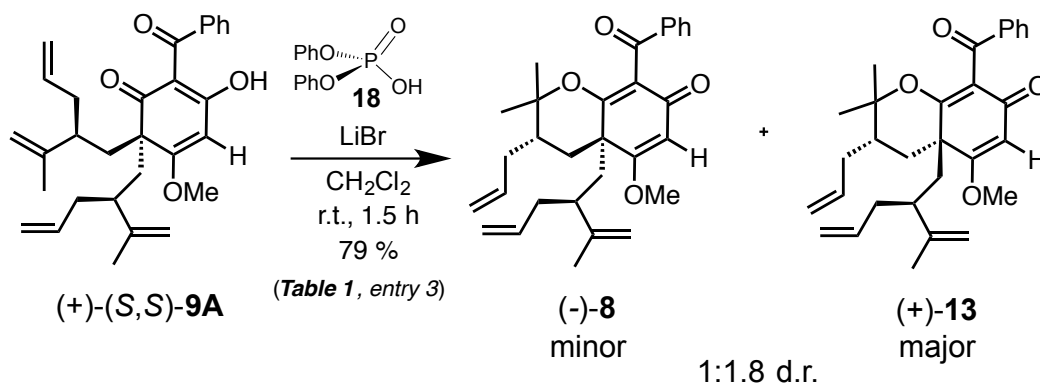

(+)-(3*S*,4*aR*)-3-Allyl-8-benzoyl-5-methoxy-2,2-dimethyl-4*a*-((*S*)-2-(prop-1-en-2-yl)pent-4-en-1-yl)-2,3,4,4*a*-tetrahydro-7*H*-chromen-7-one (+)-**13** and (-)-(3*S*,4*aS*)-3-Allyl-8-benzoyl-5-methoxy-2,2-dimethyl-4*a*-((*S*)-2-(prop-1-en-2-yl)pent-4-en-1-yl)-2,3,4,4*a*-tetrahydro-7*H*-chromen-7-one (-)-**8**: (Table 1, entry 3) To a 250-mL round-bottom flask containing a solution of enol (+)-(S,S)-**9A** (1.39 g, 3.02 mmol) in CH<sub>2</sub>Cl<sub>2</sub> (101 mL) was added LiBr (1.31 g, 15.1 mmol) in a single portion. After the suspension was stirred for one minute, diphenyl phosphate **18** (3.79 g, 15.1 mmol) was added in a single portion. The reaction mixture was allowed to stir vigorously for 1.5 h and was then quenched with saturated aqueous NaHCO<sub>3</sub> (100 mL), poured into water (20 mL), and extracted with CH<sub>2</sub>Cl<sub>2</sub> (3 x 100 mL). The combined organic layers were washed with water (1 x 100 mL) and brine (1 x 100 mL), dried (Na<sub>2</sub>SO<sub>4</sub>), filtered, and concentrated *in vacuo*. Purification by column chromatography (silica gel, 10 – 40 % EtOAc/hexanes) provided oxycyclization products (-)-**8** and (+)-**13** (1.1 g, 79 %, 1:1.8 d.r. as determined by <sup>1</sup>H NMR analysis) as a red oil. Diphenyl phosphate **18** was re-isolated following extraction of the combined aqueous layers (pH<7) with EtOAc.

(Table 1, entries 2-8, entry 11) All reactions in Table 1 using LiBr were carried out according to general procedure A to provide oxycyclization products (-)-**8** and (+)-**13**.

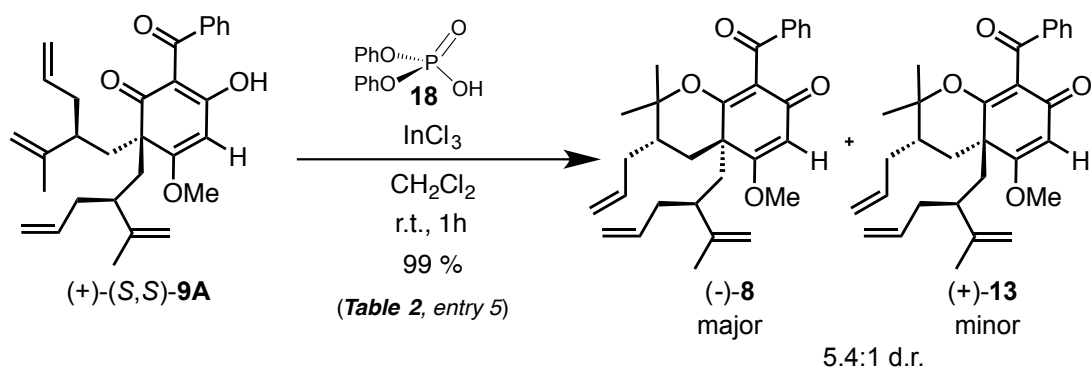

(Table 2, entry 5) Oxycyclization product (-)-**8** (3.6 mg, 99 %, 5.4:1 d.r. as determined by  $^1\text{H}$  NMR analysis) was prepared according to general procedure A from a solution of enol (+)-(S,S)-**9A** (3.6 mg, 0.00782 mmol) in  $\text{CH}_2\text{Cl}_2$  (0.53 mL) using  $\text{InCl}_3$  (17.3 mg, 0.0782 mmol) and phosphoric acid **18** (19.6 mg, 0.0782 mmol). After 1 h, the reaction was quenched with saturated aqueous  $\text{NaHCO}_3$  and extracted into  $\text{Et}_2\text{O}$  (3 x 3 mL). The combined organic layers were washed with  $\text{H}_2\text{O}$  (1 x 3 mL) and brine (1 x 3 mL), dried ( $\text{Na}_2\text{SO}_4$ ), filtered, and concentrated. Purification by column chromatography (silica gel, 10 – 40 %  $\text{EtOAc}$ /hexanes) provided oxycyclization product (-)-**8** (3.6 mg, 99 %, 5.4:1 d.r. as determined by  $^1\text{H}$  NMR analysis).

### General Procedure B

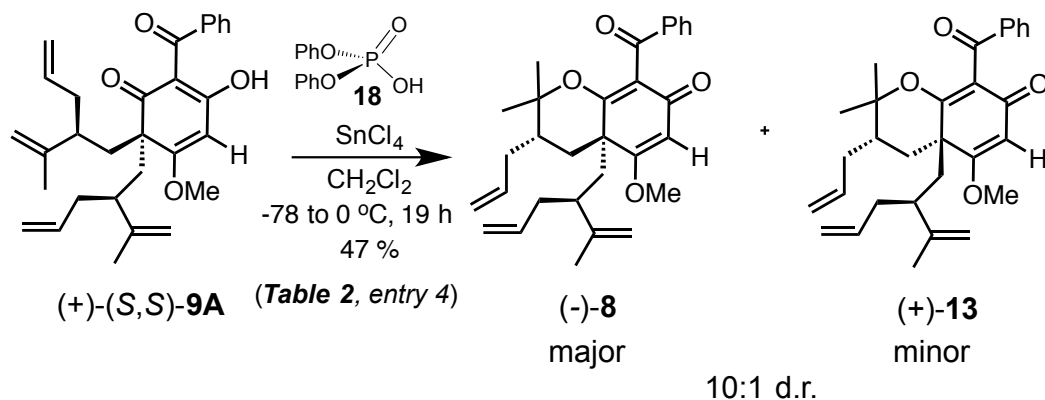

(-)-(3*S*,4*aS*)-3-Allyl-8-benzoyl-5-methoxy-2,2-dimethyl-4a-((*S*)-2-(prop-1-en-2-yl)pent-4-en-1-yl)-2,3,4,4a-tetrahydro-7*H*-chromen-7-one (-)-**8**: (Table 2, entry 4) To a flame-dried, round-bottom flask was added diphenyl phosphate **18** (10.2 mg, 0.0408 mmol) and the flask was then purged with argon. Methylene chloride (0.29 mL) and  $\text{SnCl}_4$  (0.2 mL, 0.2 M in  $\text{CH}_2\text{Cl}_2$ , 0.0408 mmol) were then added sequentially at room temperature, and the clear solution was cooled to -78 °C. A solution of enol (+)-(S,S)-**9A** (9.4 mg, 0.0204 mmol) in  $\text{CH}_2\text{Cl}_2$  (0.2 mL) was





1.0 M in CH<sub>2</sub>Cl<sub>2</sub>) in CH<sub>2</sub>Cl<sub>2</sub> (0.1 mL) at -78 °C. The reaction mixture was stirred at this temperature for 4 h and was then quenched with saturated aqueous NaHCO<sub>3</sub> and extracted into Et<sub>2</sub>O (3 x 4 mL). The combined organic layers were washed with water (1 x 5 mL) and brine (1 x 5 mL), dried (Na<sub>2</sub>SO<sub>4</sub>), filtered, and concentrated *in vacuo*. Purification by preparative thin layer chromatography (silica gel, 19 % EtOAc/hexanes with 3 % AcOH) provided oxycyclization product (-)-**8** (1.7 mg, 18 %, 9:1 d.r. as determined by <sup>1</sup>H NMR analysis).

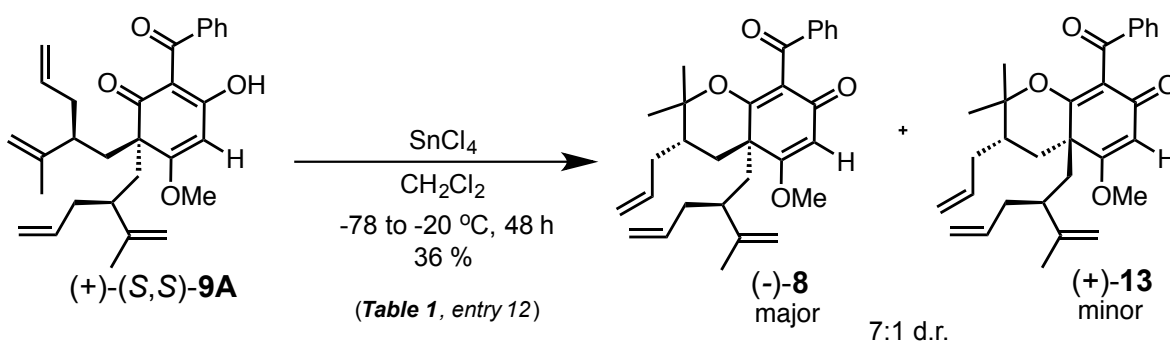

**(Table 1, entry 12)** To a solution enol (+)-(S,S)-**9A** (11.8 mg, 0.0256 mmol) in CH<sub>2</sub>Cl<sub>2</sub> (0.56 mL) in a flame-dried, round-bottom flask at -78 °C was added SnCl<sub>4</sub> (0.25 mL, 0.2 M in CH<sub>2</sub>Cl<sub>2</sub>). The reaction mixture was warmed to -20 °C for 48 h and then quenched and purified according to general procedure B to provide oxycyclization product (-)-**8** (4.3 mg, 36 %, 7:1 d.r. as determined by <sup>1</sup>H NMR analysis).

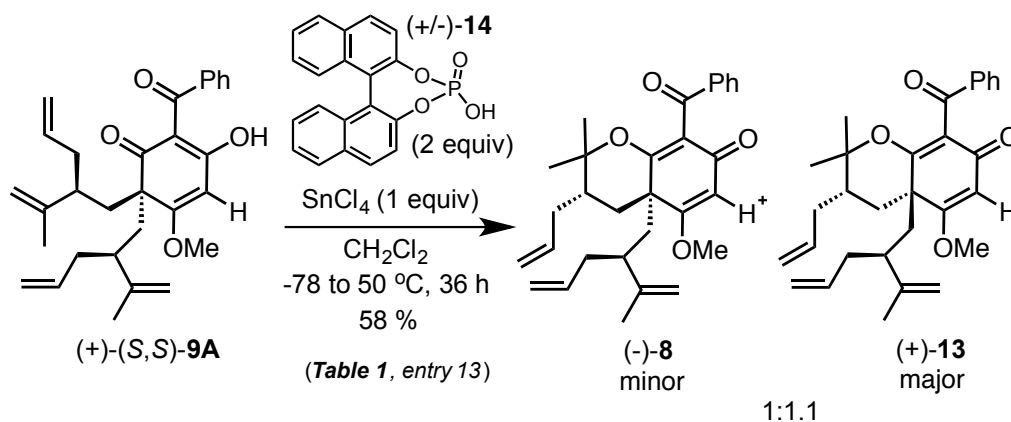

**(Table 1, entry 13)** Oxycyclization products (+)-**13** and (-)-**8** were prepared according to general

procedure B from a solution of enol (+)-(*S,S*)-**9A** (4.0 mg, 0.00868 mmol) in CH<sub>2</sub>Cl<sub>2</sub> (0.09 mL) which was added to a solution of phosphoric acid (+/-)-**14** (6.0 mg, 0.0174 mmol) and SnCl<sub>4</sub> (40 μL, 0.2 M in CH<sub>2</sub>Cl<sub>2</sub>) in CH<sub>2</sub>Cl<sub>2</sub> (0.12 mL) at -78 °C. The reaction mixture was warmed to -20 °C for 24 h and then heated to 50 °C for 12 h. The reaction was quenched with 1M HCl and extracted into CH<sub>2</sub>Cl<sub>2</sub> (3 x 4 mL). The combined organic layers were washed with water (1 x 3 mL) and brine (1 x 3 mL), dried (Na<sub>2</sub>SO<sub>4</sub>), filtered, and concentrated *in vacuo*. Purification by silica gel chromatography (10 – 40 % EtOAc/hexanes) provided oxycyclization products (+)-**13** and (-)-**8** (2.3 mg, 58 %, 1:1.1 d.r. as determined by <sup>1</sup>H NMR analysis).

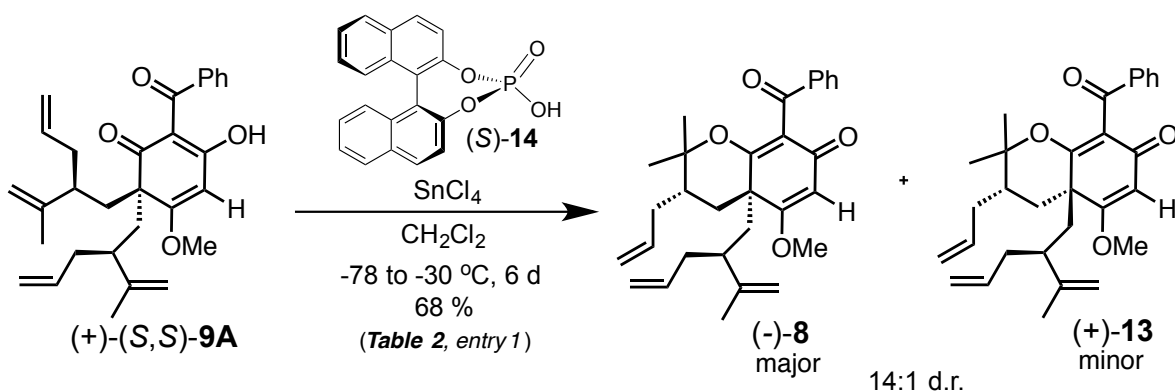

(Table 2, entry 1) Oxycyclization product (-)-**8** was prepared according to general procedure B from a solution of (+)-(*S,S*)-**9A** (3.7 mg, 0.00803 mmol) in CH<sub>2</sub>Cl<sub>2</sub> (0.15 mL) which was added to a solution of (*S*)-**14** (5.6 mg, 0.0161 mmol) and SnCl<sub>4</sub> (0.08 mL, 0.2 M in CH<sub>2</sub>Cl<sub>2</sub>) in CH<sub>2</sub>Cl<sub>2</sub> (0.11 mL) at -78 °C. The reaction mixture was warmed to -45 °C for 3 h and then allowed to stir for 6 d at -30 °C. The reaction was quenched with pyridine (1.3 μL) and saturated aqueous NaHCO<sub>3</sub> (2 mL), poured into water (2 mL), and extracted with CH<sub>2</sub>Cl<sub>2</sub> (3 x 3 mL). The combined organic layers were washed with water (1 x 3 mL) and brine (1 x 3 mL). The organic solution was dried over Na<sub>2</sub>SO<sub>4</sub>, filtered, and concentrated *in vacuo*. Purification by column chromatography (silica gel, 10 – 40 % EtOAc/hexanes) afforded oxycyclization product (-)-**8** (2.5 mg, 68 %, 14:1 d.r. as determined by <sup>1</sup>H NMR analysis).

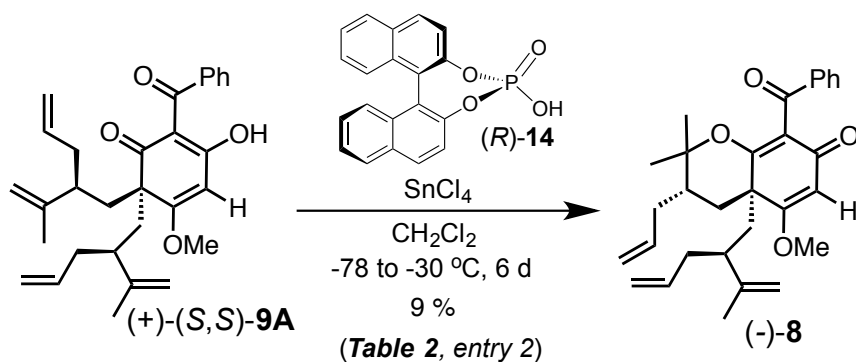

(Table 2, entry 2) Oxycyclization product (-)-8 was prepared according to general procedure B from a solution of enol (+)-(S,S)-9A (3.4 mg, 0.00738 mmol) in CH<sub>2</sub>Cl<sub>2</sub> (0.15 mL) which was added to a solution of phosphoric acid (R)-14 (5.7 mg, 0.0162 mmol) and SnCl<sub>4</sub> (0.07 mL, 0.2 M in CH<sub>2</sub>Cl<sub>2</sub>) in CH<sub>2</sub>Cl<sub>2</sub> (0.11 mL) at -78 °C. The reaction mixture was warmed to -45 °C for 3 h and then allowed to stir for 6 d at -30 °C. The reaction was quenched with pyridine (1.2 μL) and saturated aqueous NaHCO<sub>3</sub> (2 mL), poured into water (2 mL), and extracted with CH<sub>2</sub>Cl<sub>2</sub> (3 x 3 mL). The combined organic layers were washed with water (1 x 3 mL) and brine (1 x 3 mL). The organic solution was dried over Na<sub>2</sub>SO<sub>4</sub>, filtered, and concentrated *in vacuo*. Purification by column chromatography (silica gel, 10 – 40 % EtOAc/hexanes) afforded oxycyclization product (-)-8 (0.3 mg, 9 %) as a single diastereomer.

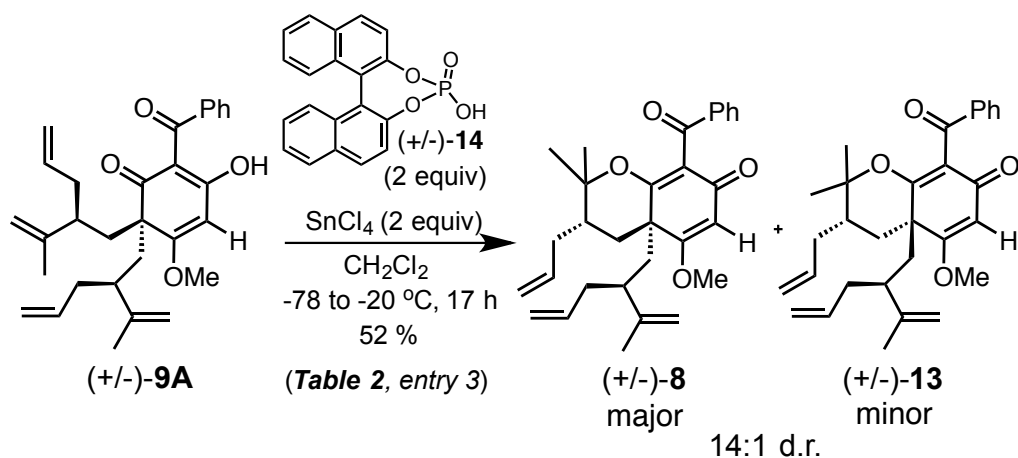

(Table 2, entry 3) Oxycyclization product (+/-)-8 was prepared according to general procedure B from a solution of enol (+/-)-9A (6.0 mg, 0.013 mmol) in CH<sub>2</sub>Cl<sub>2</sub> (0.13 mL) which was added to





# Total Synthesis of (-)-6-*epi*-, (+)-30-*epi*-, (+/-)-6,30-*epi*-13,14-Didehydroxyisogarcinol and (+/-)-6,30-*epi*-Garcimultiflorone A (Schemes S1 and S2).

## Scheme S1. Asymmetric Syntheses of (-)-6-*epi*-6 and (+)-30-*epi*-6 and Racemic Syntheses of (+/-)-6,30-*epi*-6 and (+/-)-6,30-*epi*-5.

### A. Synthesis of the Type B PPAPs (-)-*epi*-6 and (+)-30-*epi*-6.

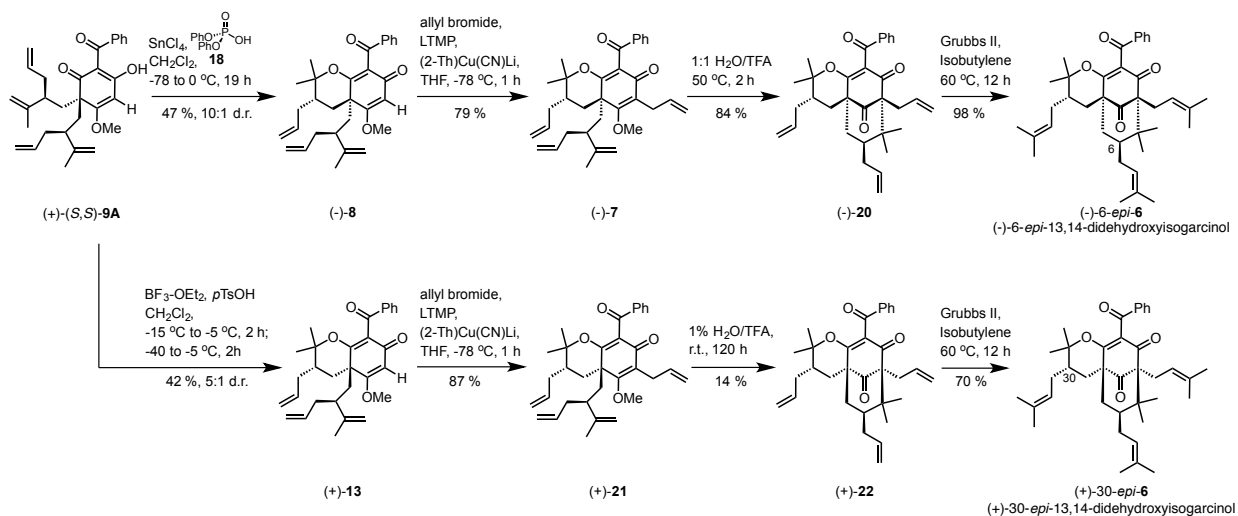

### B. Meso Diastereomers **9B** and **9C** Provide Access to Type B PPAP (+/-)-6,30-*epi*-6 and Type A PPAP (+/-)-6,30-*epi*-5.

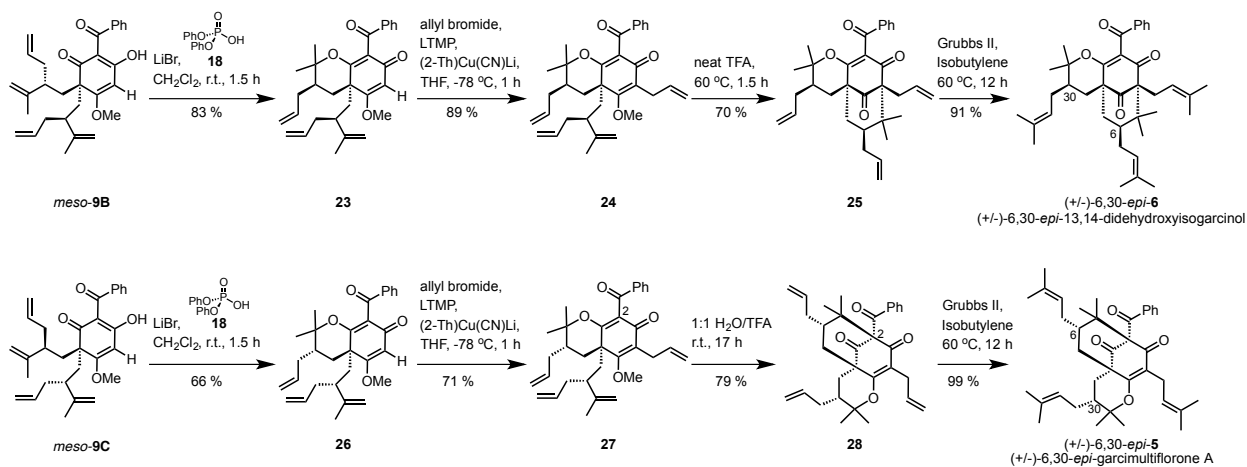

**Scheme S2A. Scalable Strategy for Production of Enantioenriched Isomers (-)-20 and (+)-22.**

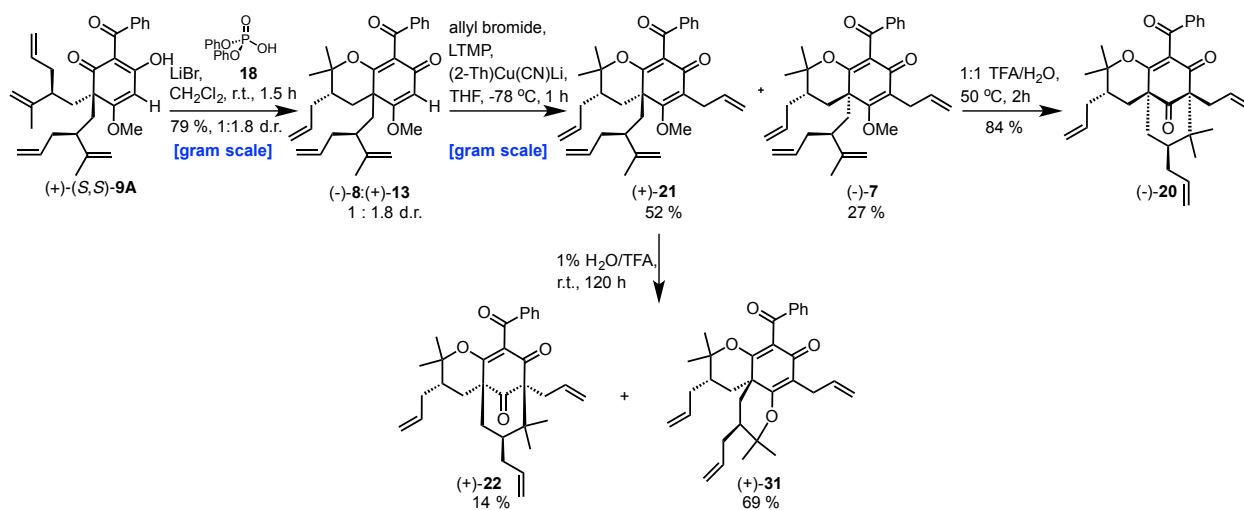

**Scheme S2B. Gram Scale Synthesis of Racemic Stereoisomers 20, 22, 25, and 28 in 4 Synthetic Operations from Acylphloroglucinol 10.**

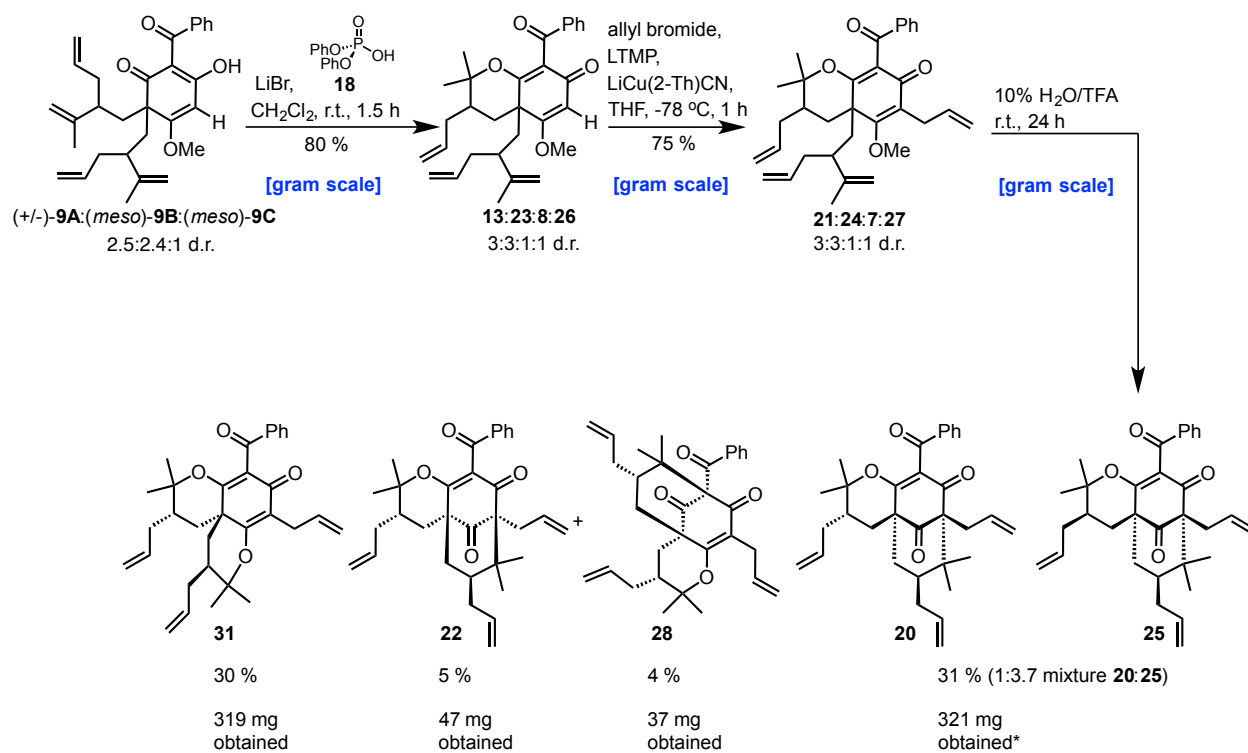

\*Column chromatography provided compounds 20 and 25 as a 1:3.7 mixture as determined by  $^1\text{H}$  NMR analysis.<sup>14</sup>

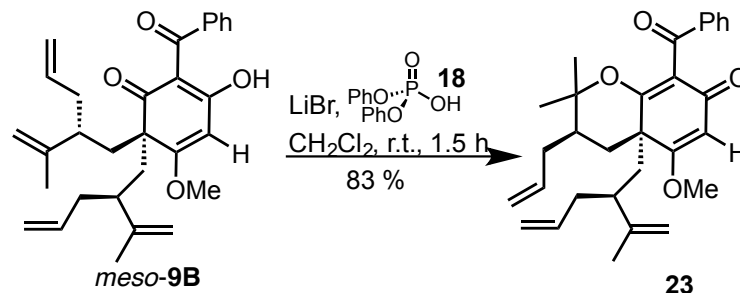

(+/-)-(3*R*,4*aR*)-3-Allyl-8-benzoyl-5-methoxy-2,2-dimethyl-4a-((*S*)-2-(prop-1-en-2-yl)pent-4-en-1-yl)-2,3,4,4a-tetrahydro-7*H*-chromen-7-one **23**: Oxycyclization product **23** (167 mg, 83 %) was provided as an amorphous solid and was prepared according to general procedure A from enol (*meso*)-**9B** (201 mg, 0.436 mmol) using LiBr (379 mg, 4.36 mmol) and diphenyl phosphate **18** (1.09 g, 4.36 mmol) in CH<sub>2</sub>Cl<sub>2</sub> (30 mL). **23**: *R<sub>f</sub>* = 0.23 (30 % EtOAc/hexanes); IR  $\nu_{\max}$  3073, 2977, 2940, 2845, 1677, 1652, 1622, 1598, 1449, 1389, 1374, 1262, 1226, 1174, 1133, 1078, 994, 914, 839, 778, 731 cm<sup>-1</sup>; <sup>1</sup>H NMR (400 MHz, CDCl<sub>3</sub>)  $\delta$  7.95 – 7.82 (m, 2H), 7.58 – 7.47 (m, 1H), 7.47 – 7.37 (m, 2H), 5.83 – 5.59 (m, 2H), 5.51 (s, 1H), 5.18 – 4.94 (m, 4H), 3.64 (s, 3H), 2.30 – 2.05 (m, 7H), 2.00 (dd, *J* = 13.3, 6.3 Hz, 1H), 1.72 (ddd, *J* = 13.6, 9.4, 9.4 Hz, 1H), 1.67 (s, 3H), 1.52 (dd, *J* = 13.0, 13.0 Hz, 1H), 1.33 (s, 3H), 1.03 (s, 3H); <sup>13</sup>C NMR (100 MHz, CDCl<sub>3</sub>)  $\delta$  194.1, 186.2, 174.9, 168.2, 146.8, 137.6, 136.6, 135.8, 133.1, 129.2, 128.3, 126.1, 117.3, 116.2, 111.7, 102.9, 87.4, 55.2, 45.4, 42.6, 39.9, 39.8, 39.4, 36.1, 35.1, 28.2, 20.6, 18.9; **HR-MS**: *m/z* Calcd. for C<sub>30</sub>H<sub>36</sub>O<sub>4</sub> [M+H<sup>+</sup>]: 461.2692, Found 461.2701.

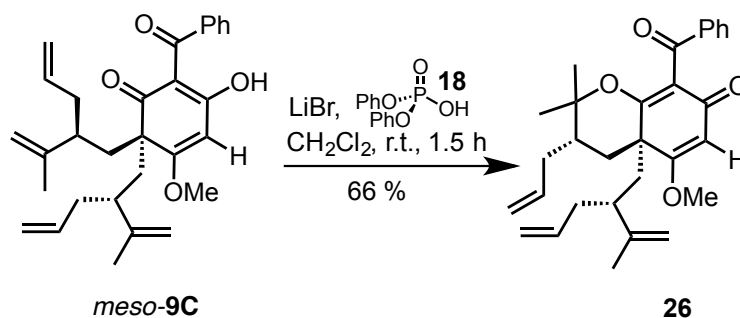

(+/-)-(3*S*,4*aR*)-3-Allyl-8-benzoyl-5-methoxy-2,2-dimethyl-4a-((*R*)-2-(prop-1-en-2-yl)pent-4-en-1-yl)-2,3,4,4a-tetrahydro-7*H*-chromen-7-one **26**: Oxycyclization product **26** (63.6 mg, 66 %) was synthesized as an amorphous solid and was prepared according to general procedure A from enol (*meso*)-**9C** (95.8 mg, 0.208 mmol), LiBr (182 mg, 2.1 mmol), diphenyl phosphate **18** (525 mg, 2.1 mmol) in CH<sub>2</sub>Cl<sub>2</sub> (14 mL). **26**: *R<sub>f</sub>* = 0.31 (35 % EtOAc/hexanes); IR  $\nu_{\max}$  3075,



2979, 2933, 2920, 2857, 1678, 1650, 1622, 1598, 1449, 1374, 1349, 1259, 1226, 1169, 1126, 1075, 1006, 915, 839, 781, 733  $\text{cm}^{-1}$ ;  $^1\text{H}$  NMR (500 MHz,  $\text{CDCl}_3$ )  $\delta$  7.91 – 7.82 (m, 2H), 7.55 – 7.48 (m, 1H), 7.44 – 7.37 (m, 2H), 5.67 (dddd,  $J = 16.4, 10.0, 8.0, 5.8$  Hz, 1H), 5.65 – 5.57 (m, 1H), 5.60 (s, 1H), 5.14 – 4.91 (m, 4H), 4.76 (t,  $J = 1.5$  Hz, 1H), 4.67 (s, 1H), 3.75 (s, 3H), 2.48 (dd,  $J = 13.7, 3.7$  Hz, 1H), 2.24 – 2.09 (m, 2H), 2.08 – 1.88 (m, 4H), 1.74 (ddd,  $J = 13.9, 8.8, 8.8$  Hz, 1H), 1.66 (s, 3H), 1.64 – 1.57 (m, 1H), 1.54 (dd,  $J = 13.3$  Hz, 1H), 1.27 (s, 3H), 1.02 (s, 3H);  $^{13}\text{C}$  NMR (125 MHz,  $\text{CDCl}_3$ )  $\delta$  194.1, 186.0, 175.1, 170.0, 146.1, 137.7, 136.5, 135.8, 133.0, 129.3, 128.3, 126.0, 117.3, 116.1, 111.7, 102.5, 88.3, 55.8, 47.6, 45.3, 42.7, 42.4, 39.5, 36.0, 35.5, 28.8, 21.6, 19.9; **HR-MS**:  $m/z$  Calcd. for  $\text{C}_{30}\text{H}_{36}\text{O}_4$  [ $\text{M}+\text{H}^+$ ]: 461.2692, Found 461.2690.

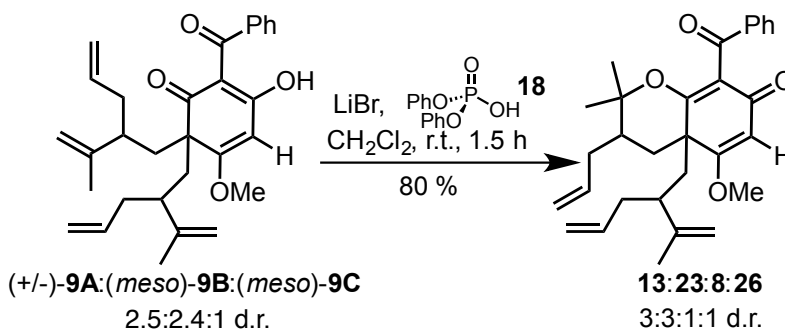

**(+/-)-3-Allyl-8-benzoyl-5-methoxy-2,2-dimethyl-4a-(2-(prop-1-en-2-yl)pent-4-en-1-yl)-2,3,4,4a-tetrahydro-7H-chromen-7-one 13:23:8:26**: Oxycyclization products **13:23:8:26** (1.7 g, 3:3:1:1 d.r. as determined by  $^1\text{H}$  NMR analysis) were prepared according to general procedure A from enols  $(+/-)\text{-9A}:(\text{meso})\text{-9B}:(\text{meso})\text{-9C}$  (2.0 g, 4.34 mmol, 2.5:2.4:1 d.r. as determined by  $^1\text{H}$  NMR analysis), LiBr (3.77 g, 43.4 mmol), diphenyl phosphate **18** (10.9 g, 43.4 mmol) in  $\text{CH}_2\text{Cl}_2$  (289 mL).

## Vinylic Allylation:

### General Procedure D

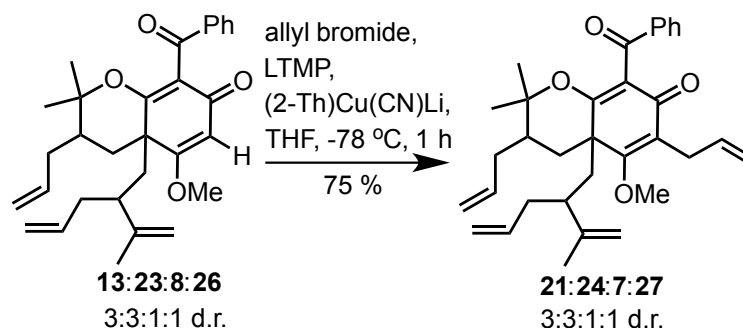

(Lithium Tetramethylpiperidine [LTMP] Preparation): To a flame-dried 10-mL round-bottom flask under an argon atmosphere containing a solution of 2,2,6,6-tetramethylpiperidine (2.08 mL, 12.3 mmol) in THF (24 mL) at -78 °C was added *n*BuLi (4.96 mL, 2.5 M in THF) in a dropwise fashion over the course of 15 min. The LTMP solution was allowed to stir for 15 min at -78 °C prior to use.

**(+/-)-3,6-Diallyl-8-benzoyl-5-methoxy-2,2-dimethyl-4a-(2-(prop-1-en-2-yl)pent-4-en-1-yl)-2,3,4,4a-tetrahydro-7H-chromen-7-one 21:24:7:27:** To a flame-dried 1-L round-bottom flask under an argon atmosphere containing pyranodienones **13:23:8:26** (1.04 g, 2.27 mmol, 3:3:1:1 d.r. as determined by <sup>1</sup>H NMR analysis) was added THF (86.4 mL). The solution was cooled to -78 °C, and a freshly prepared solution (at -78 °C) of LTMP (22.7 mL, 0.5 M in THF) was added along the side of the flask in a dropwise fashion over the course of an hour. Lithium 2-thienylcyanocuprate (49.9 mL, 0.25 M in THF) was then added in a dropwise manner along the side of the flask over the course of an hour. [Note: Lithium 2-thienylcyanocuprate should be bright yellow in color and should not contain any visible copper salts for optimal yields.] Allyl bromide (0.98 mL, 11.3 mmol) was added dropwise into the center of the reaction mixture over the course of 10 min. [Note: Allyl bromide was filtered through a pad of basic Al<sub>2</sub>O<sub>3</sub> under an argon atmosphere prior to use.] The reaction was allowed to stir for 1 h and was then quenched with 30 % NH<sub>4</sub>OH (432 mL), diluted with Et<sub>2</sub>O (200 mL), and vigorously stirred for 5 min at room temperature. The mixture was poured into a separatory funnel and extracted into Et<sub>2</sub>O (3 x 400 mL). The combined organic extracts were washed with water (1 x 400 mL) and brine (1 x

400 mL), dried (Na<sub>2</sub>SO<sub>4</sub>), filtered, and concentrated *in vacuo*. Purification by column chromatography (silica gel, 2 – 10 % EtOAc/hexanes) provided vinylic allylation products **21:23:7:27** (853 mg, 75 %, 3:3:1:1 d.r. as determined by <sup>1</sup>H NMR analysis) as a brown oil.

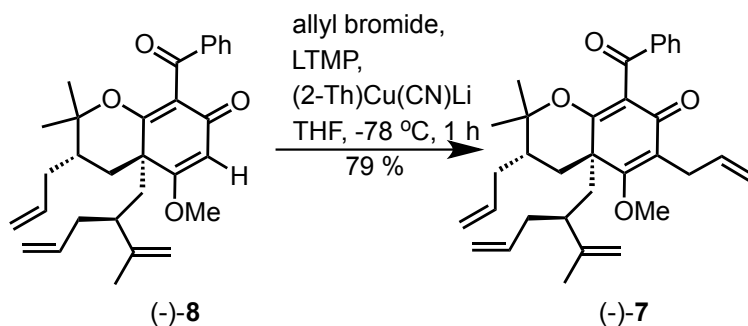

**(-)-(3*S*,4*aR*)-3,6-Diallyl-8-benzoyl-5-methoxy-2,2-dimethyl-4*a*-((*S*)-2-(prop-1-en-2-yl)pent-4-en-1-yl)-2,3,4,4*a*-tetrahydro-7*H*-chromen-7-one (-)-7**: Vinylic allylation product (-)-7 (17.4 mg, 79 %) was prepared according to general procedure D from a solution of pyranodioneone (-)-**8** (20.3 mg, 0.0441 mmol) in THF (1.68 mL) at -78 °C using LTMP (0.44 mL, 0.5 M in THF), lithium 2-thienylcyanocuprate (0.97 mL, 0.25 M in THF), and allyl bromide (19 μL, 0.22 mmol). (-)-7: *R<sub>f</sub>* = 0.38 (20 % EtOAc/hexanes); IR  $\nu_{\max}$  2982, 2917, 2848, 1677, 1656, 1618, 1598, 1449, 1373, 1229, 1174, 1129, 998, 916, 739 cm<sup>-1</sup>; <sup>1</sup>H NMR (500 MHz, CDCl<sub>3</sub>)  $\delta$  7.87 – 7.82 (m, 2H), 7.55 – 7.48 (m, 1H), 7.41 (m, 2H), 5.93 (dddd, *J* = 16.5, 10.2, 6.3, 6.1 Hz, 1H), 5.69 (dddd, *J* = 16.4, 10.4, 8.3, 5.8 Hz, 1H), 5.62 (dddd, *J* = 17.1, 10.2, 6.8, 6.6 Hz, 1H), 5.12 – 4.90 (m, 6H), 4.68 (t, *J* = 1.4 Hz, 1H), 4.54 (br s, 1H), 3.93 (s, 3H), 3.26 (dddd, *J* = 15.6, 5.7, 1.8, 1.8 Hz, 1H), 3.06 (dddd, *J* = 15.7, 6.4, 1.6, 1.6 Hz, 1H), 2.44 (dd, *J* = 14.5, 4.5 Hz, 1H), 2.22 (dd, *J* = 13.5, 5.8 Hz, 1H), 2.19 – 1.95 (m, 4H), 1.92 (dd, *J* = 13.5, 3.4 Hz, 1H), 1.74 (ddd, *J* = 13.8, 10.2, 9.6 Hz, 1H), 1.66 – 1.59 (m, 1H), 1.60 (br s, 3H), 1.49 (dd, *J* = 14.6, 13.0 Hz, 1H), 1.27 (s, 3H), 1.12 (s, 3H); <sup>13</sup>C NMR (125 MHz, CDCl<sub>3</sub>)  $\delta$  194.4, 186.4, 171.8, 169.9, 146.7, 137.7, 136.6, 136.5, 135.9, 133.0, 129.1, 128.4, 126.0, 119.9, 117.2, 116.1, 115.0, 111.7, 88.1, 62.1, 49.1, 45.2, 42.5, 39.4, 35.7, 35.5, 28.8, 28.5, 21.7, 18.9; **HR-MS**: *m/z* Calcd. for C<sub>33</sub>H<sub>40</sub>O<sub>4</sub> [M+H<sup>+</sup>]: 501.3005, Found 501.3013;  $[\alpha]_D^{27}$  = -140.6 (c. 0.250, CHCl<sub>3</sub>).

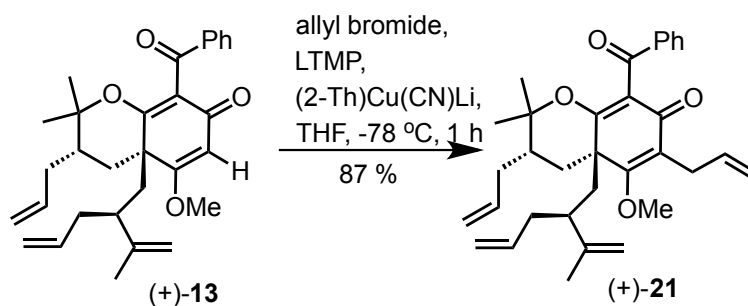

**(+)-(3*S*,4*aS*)-3,6-Diallyl-8-benzoyl-5-methoxy-2,2-dimethyl-4*a*-((*S*)-2-(prop-1-en-2-yl)pent-4-en-1-yl)-2,3,4,4*a*-tetrahydro-7*H*-chromen-7-one (+)-21**: Vinylic allylation product (+)-21 (93.8 mg, 87 %) was prepared according to general procedure D from a solution of pyranodioneone (+)-13 (98.7 mg, 0.2143 mmol) in THF (8.2 mL) at -78 °C using LTMP (2.14 mL, 0.5 M in THF), lithium 2-thienylcyanocuprate (4.7 mL, 0.25 M in THF), and allyl bromide (0.1 mL, 1.16 mmol). (+)-21:  $R_f = 0.28$  (15 % EtOAc/hexanes); IR  $\nu_{\max}$  3072, 2976, 2928, 2848, 1678, 1656, 1622, 1449, 1387, 1372, 1229, 1178, 1130, 995, 912, 740  $\text{cm}^{-1}$ ;  $^1\text{H}$  NMR (500 MHz,  $\text{CDCl}_3$ )  $\delta$  7.87 – 7.80 (m, 2H), 7.53 – 7.47 (m, 1H), 7.42 – 7.35 (m, 2H), 5.95 (dddd,  $J = 16.7, 10.1, 6.0, 6.0$  Hz, 1H), 5.80 – 5.69 (m, 1H), 5.67 – 5.56 (m, 1H), 5.15 – 4.91 (m, 6H), 4.73 (qd,  $J = 1.5, 1.4$  Hz, 1H), 4.59 (br s, 1H), 3.97 (s, 3H), 3.27 (dddd,  $J = 15.4, 5.7, 1.6, 1.6$  Hz, 1H), 3.20 (dddd,  $J = 15.7, 6.4, 1.6, 1.6$  Hz, 1H), 2.34 – 2.27 (m, 1H), 2.23 (dd,  $J = 13.5, 3.8$  Hz, 1H), 2.20 – 2.12 (m, 2H), 2.11 – 1.97 (m, 3H), 1.79 – 1.72 (m, 1H), 1.72 – 1.63 (m, 1H), 1.62 (s, 3H), 1.47 (dd,  $J = 12.9, 12.9$  Hz, 1H), 1.31 (s, 3H), 0.95 (s, 3H);  $^{13}\text{C}$  NMR (125 MHz,  $\text{CDCl}_3$ )  $\delta$  194.0, 186.7, 172.0, 168.5, 145.9, 137.7, 136.7, 136.2, 135.9, 132.9, 129.3, 128.1, 125.9, 121.4, 117.2, 115.7, 115.3, 112.3, 87.3, 62.4, 46.8, 43.5, 39.7, 39.5, 39.3, 36.6, 36.1, 28.2, 28.2, 20.7, 18.8; **HR-MS**:  $m/z$  Calcd. for  $\text{C}_{33}\text{H}_{40}\text{O}_4$   $[\text{M}+\text{H}^+]$ : 501.3005, Found 501.3006;  $[\alpha]_D^{27} = +41.1$  (c. 0.250,  $\text{CHCl}_3$ ).

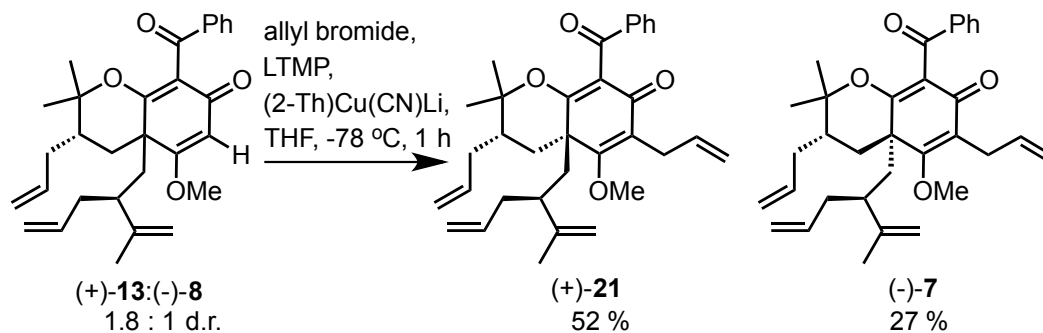

(+)-(3*S*,4*aS*)-3,6-Diallyl-8-benzoyl-5-methoxy-2,2-dimethyl-4*a*-((*S*)-2-(prop-1-en-2-yl)pent-4-en-1-yl)-2,3,4,4*a*-tetrahydro-7*H*-chromen-7-one (+)-**21** and (-)-(3*S*,4*aR*)-3,6-Diallyl-8-benzoyl-5-methoxy-2,2-dimethyl-4*a*-((*S*)-2-(prop-1-en-2-yl)pent-4-en-1-yl)-2,3,4,4*a*-tetrahydro-7*H*-chromen-7-one (-)-**7**: Vinylic allylation products (+)-**21** (621 mg, 52 %) and (-)-**7** (323 mg, 27 %) were prepared according to general procedure D from a solution of pyranodienones (+)-**13**:(-)-**8** (1.1 g, 2.39 mmol) in THF (91 mL) at -78 °C using LTMP (23.9 mL, 0.5 M in THF), lithium 2-thienylcyanocuprate (52.5 mL, 0.25 M in THF), and allyl bromide (1.03 mL, 11.9 mmol). Purification by column chromatography (silica gel, 2 – 14 % EtOAc/hexanes) provided 306 mg of (+)-**21** and 159 mg of (-)-**7**. Purification of remaining impure fractions by preparative thin layer chromatography (silica gel, 4 elutions in 15 % EtOAc/hexanes) afforded an additional 315 mg of (+)-**21** and 164 mg of (-)-**7**. Reaction yield:[(+)-**21** (621 mg, 52 %) and (-)-**7** (323 mg, 27 %)]

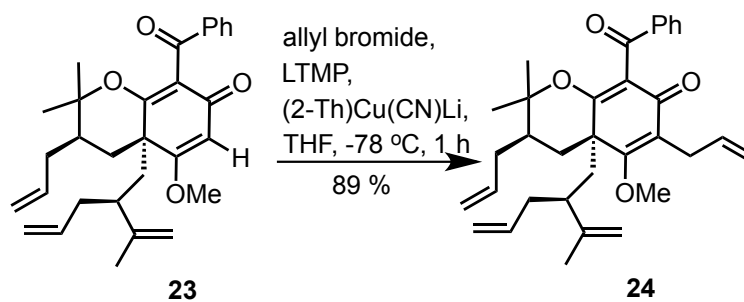

(+/-)-(3*R*,4*aR*)-3,6-Diallyl-8-benzoyl-5-methoxy-2,2-dimethyl-4*a*-((*S*)-2-(prop-1-en-2-yl)pent-4-en-1-yl)-2,3,4,4*a*-tetrahydro-7*H*-chromen-7-one **24**: Vinylic allylation product **24** (19.3 mg, 89 %) was prepared as a yellow oil according to general procedure D from a solution of pyranodienone **23** (20.0 mg, 0.0434 mmol) in THF (1.65 mL) at -78 °C using LTMP (0.43 mL, 0.5 M in THF), lithium 2-thienylcyanocuprate (0.96 mL, 0.25 M in THF), and allyl bromide (20

$\mu\text{L}$ , 0.231 mmol). **24**:  $R_f = 0.26$  (14 % EtOAc/hexanes); IR  $\nu_{\text{max}}$  3075, 2977, 2924, 2852, 1678, 1656, 1621, 1449, 1372, 1229, 1175, 1130, 1074, 995, 912, 741  $\text{cm}^{-1}$ ;  $^1\text{H}$  NMR (500 MHz,  $\text{CDCl}_3$ )  $\delta$  7.87 – 7.80 (m, 2H), 7.55 – 7.48 (m, 1H), 7.45 – 7.37 (m, 2H), 5.93 (dddd,  $J = 16.7$ , 10.0, 6.1, 6.1 Hz, 1H), 5.81 – 5.69 (m, 1H), 5.64 (dddd,  $J = 17.0$ , 10.1, 6.6, 6.6 Hz, 1H), 5.14 – 4.92 (m, 6H), 4.68 (dd,  $J = 1.3$ , 1.3 Hz, 1H), 4.56 (s, 1H), 3.91 (s, 3H), 3.25 (dddd,  $J = 15.5$ , 5.5, 2.0, 2.0 Hz, 1H), 3.06 (dddd,  $J = 15.9$ , 6.8, 1.7, 1.7 Hz, 1H), 2.27 – 2.00 (m, 7H), 1.97 (dd,  $J = 13.3$ , 6.0 Hz, 1H), 1.69 (ddd,  $J = 14.0$ , 9.6, 9.6 Hz, 1H), 1.61 (s, 3H), 1.47 (dd,  $J = 13.2$ , 13.2 Hz, 1H), 1.31 (s, 3H), 0.99 (s, 3H);  $^{13}\text{C}$  NMR (125 MHz,  $\text{CDCl}_3$ )  $\delta$  194.2, 186.6, 172.1, 168.6, 146.9, 137.6, 136.7, 136.5, 135.9, 133.0, 129.1, 128.3, 125.9, 120.3, 117.2, 116.1, 115.0, 111.8, 87.1, 62.0, 46.8, 42.6, 39.9, 39.5, 39.4, 36.2, 35.0, 28.2, 28.2, 20.8, 18.8; **HR-MS**:  $m/z$  Calcd. for  $\text{C}_{33}\text{H}_{40}\text{O}_4$  [ $\text{M}+\text{H}^+$ ]: 501.3005, Found 501.2999.

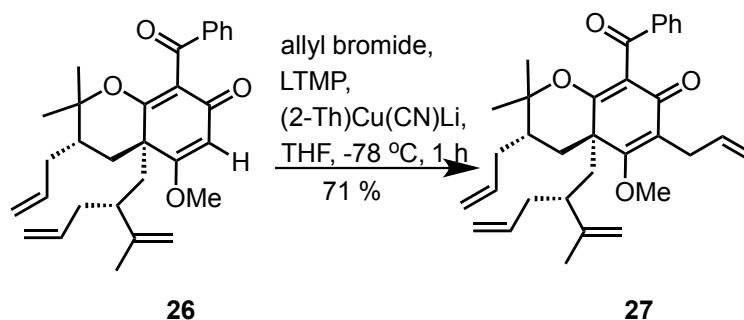

**(+/-)-(3*S*,4*aR*)-3,6-Diallyl-8-benzoyl-5-methoxy-2,2-dimethyl-4a-((*R*)-2-(prop-1-en-2-yl)pent-4-en-1-yl)-2,3,4,4a-tetrahydro-7*H*-chromen-7-one 27**: Vinylic allylation product **27** (48.9 mg, 71 %) was prepared according to general procedure D from a solution of pyranodienone **26** (63.6 mg, 0.138 mmol) in THF (5.3 mL) at  $-78\text{ }^\circ\text{C}$  using LTMP (1.4 mL, 0.5 M in THF), lithium 2-thienylcyanocuprate (3.0 mL, 0.25 M in THF), and allyl bromide (60  $\mu\text{L}$ , 0.691 mmol). **27**:  $R_f = 0.42$  (25 % EtOAc/hexanes); IR  $\nu_{\text{max}}$  3082, 2978, 2935, 2849, 1679, 1654, 1620, 1449, 1373, 1229, 1172, 1123, 1068, 996, 913, 740  $\text{cm}^{-1}$ ;  $^1\text{H}$  NMR (500 MHz,  $\text{CDCl}_3$ )  $\delta$  7.86 – 7.81 (m, 2H), 7.54 – 7.48 (m, 1H), 7.43 – 7.37 (m, 2H), 5.95 (dddd,  $J = 16.5$ , 10.4, 6.1, 6.1 Hz, 1H), 5.69 (dddd,  $J = 16.7$ , 10.3, 8.6, 5.6 Hz, 1H), 5.60 (dddd,  $J = 16.0$ , 12.0, 6.9, 6.7 Hz, 1H), 5.14 – 4.90 (m, 6H), 4.74 (br s, 1H), 4.62 (br s, 1H), 4.01 (s, 3H), 3.24 (ddd,  $J = 37.9$ , 15.8, 5.9 Hz, 2H), 2.45 (dd,  $J = 14.1$ , 4.2 Hz, 1H), 2.16 (dddd,  $J = 31.6$ , 13.8, 8.6, 8.6 Hz, 2H), 2.06 – 1.95 (m, 4H), 1.74 (ddd,  $J = 14.2$ , 9.4, 9.4 Hz, 1H), 1.63 (s, 3H), 1.61 – 1.55 (m, 1H), 1.51 (dd,  $J = 14.1$  Hz, 1H), 1.27 (s, 3H), 1.07 (s, 3H);  $^{13}\text{C}$  NMR (125 MHz,  $\text{CDCl}_3$ )  $\delta$  194.2, 186.3, 171.9,

170.0, 146.1, 137.8, 136.7, 136.4, 135.9, 132.9, 129.2, 128.2, 126.3, 120.7, 117.3, 115.8, 115.2, 112.0, 88.2, 62.4, 49.1, 45.2, 42.9, 42.3, 39.1, 36.2, 35.4, 28.7, 28.5, 21.7, 19.5; **HR-MS**:  $m/z$  Calcd. for  $C_{33}H_{40}O_4$   $[M+H]^+$ : 501.3005, Found 501.3021.

### Cationic C-Cyclization to a [3.3.1]-Bicyclic Framework

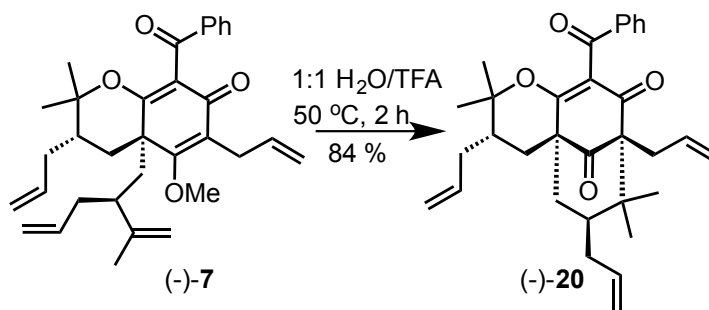

**(-)-(3*S*,4*aR*,6*S*,8*S*)-3,6,8-Triallyl-10-benzoyl-2,2,7,7-tetramethyl-3,4,5,6,7,8-hexahydro-2*H*,9*H*-4*a*,8-methanocycloocta[*b*]pyran-9,11-dione (-)-20**: Trifluoroacetic acid (1.0 mL) and water (1.0 mL) were added to a 20-mL scintillation vial. After the mixture cooled to room temperature, the TFA/H<sub>2</sub>O (2.0 mL) mixture was added to a 20-mL scintillation vial containing pyranodienone (-)-7 (7.1 mg, 0.0141 mmol). The reaction mixture was then heated to 50 °C for 2 h, cooled to room temperature, and concentrated *in vacuo*. Purification by column chromatography provided C-cyclization product (-)-20 (5.8 mg, 84 %) as a white amorphous solid. (-)-20:  $R_f$  = 0.43 (20 % EtOAc/hexanes); IR  $\nu_{\max}$  3078, 2978, 2935, 1728, 1682, 1641, 1600, 1449, 1391, 1374, 1351, 1305, 1120, 993, 917, 733  $\text{cm}^{-1}$ ;  $^1\text{H}$  NMR (500 MHz,  $\text{CDCl}_3$ )  $\delta$  7.78 – 7.70 (m, 2H), 7.55 – 7.48 (m, 1H), 7.42 – 7.35 (m, 2H), 5.85 – 5.77 (m, 1H), 5.73 (dddd,  $J$  = 16.5, 9.8, 8.8, 5.2 Hz, 1H), 5.64 (dddd,  $J$  = 16.6, 10.2, 7.6, 6.2 Hz, 1H), 5.17 – 4.98 (m, 6H), 3.02 (dd,  $J$  = 14.2, 3.6 Hz, 1H), 2.69 (dddd,  $J$  = 13.1, 7.5, 1.2, 1.2 Hz, 1H), 2.58 (dddd,  $J$  = 12.9, 6.3, 1.3, 1.3 Hz, 1H), 2.44 – 2.37 (m, 1H), 2.18 (dd,  $J$  = 13.9, 4.7 Hz, 1H), 2.21 – 2.05 (m, 2H), 1.79 (ddd,  $J$  = 14.1, 10.3, 8.4 Hz, 1H), 1.70 (ddd,  $J$  = 13.9, 9.6, 9.6 Hz, 1H), 1.53 – 1.42 (m, 2H), 1.21 (s, 3H), 1.09 (s, 3H), 1.00 (dd,  $J$  = 13.9, 13.9 Hz, 1H), 0.93 (s, 3H), 0.74 (s, 3H);  $^{13}\text{C}$  NMR (125 MHz,  $\text{CDCl}_3$ )  $\delta$  205.9, 193.7, 193.2, 171.0, 137.3, 136.8, 135.5, 134.4, 133.1, 129.0, 128.3, 127.1, 119.2, 117.4, 116.8, 87.0, 70.7, 52.9, 46.1, 42.0, 41.9, 39.7, 35.5, 33.7, 30.0, 28.4, 27.3, 22.0, 21.3, 16.1; **HR-MS**:  $m/z$  Calcd. for  $C_{32}H_{38}O_4$   $[M+Na]^+$ : 509.2668, Found 509.2674;  $[\alpha]_D^{27}$

= -110.9 (c. 0.250, CHCl<sub>3</sub>).

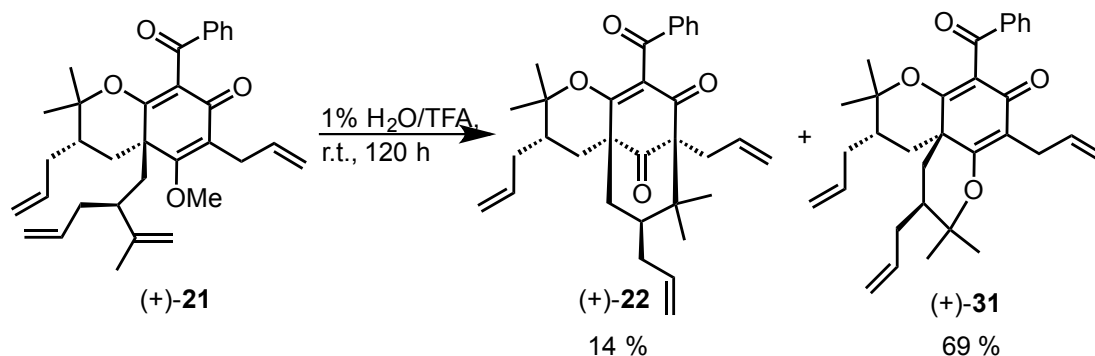

**(+)-(3*S*,4*aR*,6*S*,8*S*)-3,6,8-Triallyl-10-benzoyl-2,2,7,7-tetramethyl-3,4,5,6,7,8-hexahydro-2*H*,9*H*-4*a*,8-methanocycloocta[*b*]pyran-9,11-dione (+)-22:** To a 25-mL round-bottom flask containing pyranodienone (+)-**21** (10.0 mg, 0.01997 mmol) and a stir bar was added TFA (5.0 mL) and the solution was allowed to stir at room temperature for 1 h. Water (0.05 mL) was then added and the reaction mixture was allowed to stir for 24 hours. The solvent was removed *in vacuo*. This process was repeated 5x before purification by column chromatography (silica gel, 2 – 12 % EtOAc/hexanes) to provide *C*-cyclization product (+)-**22** (1.4 mg, 14 %) as a yellow solid and *O*-cyclization product (+)-**31** (6.7 mg, 69 %) as a white amorphous solid. (+)-**22**:  $R_f$  = 0.31 (15 % EtOAc/hexanes); **m.p.** 95 – 100 °C (CH<sub>2</sub>Cl<sub>2</sub>); IR  $\nu_{\max}$  3085, 2981, 2934, 2858, 1727, 1682, 1640, 1607, 1449, 1390, 1353, 1230, 1173, 1137, 1120, 1002, 922, 731 cm<sup>-1</sup>; <sup>1</sup>H NMR (500 MHz, CDCl<sub>3</sub>)  $\delta$  7.76 – 7.69 (m, 2H), 7.54 – 7.48 (m, 1H), 7.37 (m, *J* = 7.7 Hz, 2H), 5.77 – 5.55 (m, 3H), 5.27 (ddd, *J* = 17.0, 2.0 Hz, 1H), 5.13 – 5.05 (m, 4H), 5.02 (dd, *J* = 10.2, 2.1 Hz, 1H), 2.73 – 2.64 (m, 3H), 2.60 (dd, *J* = 12.9, 6.6 Hz, 1H), 2.36 (ddd, *J* = 14.4, 4.3 Hz, 1H), 2.20 (br dd, *J* = 14.2, 5.7 Hz, 1H), 1.98 – 1.87 (m, 2H), 1.80 – 1.66 (m, 3H), 1.65 – 1.57 (m, 1H), 1.30 (s, 3H), 1.15 (s, 3H), 1.03 (s, 3H), 0.77 (s, 3H); <sup>13</sup>C NMR (100 MHz, CDCl<sub>3</sub>)  $\delta$  208.9, 193.7, 193.2, 170.5, 138.1, 137.4, 135.2, 134.2, 133.2, 128.9, 128.2, 123.6, 119.3, 117.8, 117.8, 85.4, 69.7, 48.2, 46.6, 44.4, 38.6, 36.2, 35.9, 34.7, 30.3, 28.7, 27.9, 26.7, 22.1, 21.4; **HR-MS**: *m/z* Calcd. for C<sub>32</sub>H<sub>38</sub>O<sub>4</sub> [M+H<sup>+</sup>]: 487.2770, Found 487.2762;  $[\alpha]_D^{24.6}$  = +24.4 (c. 0.250, CHCl<sub>3</sub>).



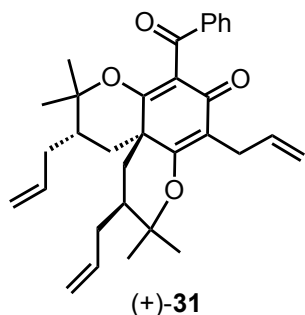

(+)-(3*S*,4*aS*,6*S*)-3,6,9-Triallyl-11-benzoyl-2,2,7,7-tetramethyl-3,4,6,7-tetrahydro-2*H*,5*H*,10*H*-pyrano[3,2-*e*]chromen-10-one (+)-**31**:

$R_f = 0.16$  (15 % EtOAc/hexanes); IR  $\nu_{\max}$  3077, 2979, 2932, 2851, 1686, 1659, 1622, 1449, 1396, 1374, 1270, 1226, 1195, 1123, 995, 914, 841, 734  $\text{cm}^{-1}$ ;  $^1\text{H}$  NMR (500 MHz,  $\text{CDCl}_3$ )  $\delta$  7.86 – 7.80 (m, 2H), 7.56 – 7.48 (m, 1H), 7.46 – 7.38 (m, 2H), 5.85 (dddd,  $J = 16.7$ , 10.0, 6.5 Hz, 1H), 5.78 – 5.64 (m, 2H), 5.19 – 4.89 (m, 6H), 3.18 (dddd,  $J = 14.2$ , 6.7, 1.4 Hz, 1H), 3.08 (dddd,  $J = 14.2$ , 6.3, 1.6 Hz, 1H), 2.49 (ddd,  $J = 14.5$ , 11.3, 3.7 Hz, 2H), 2.02 – 1.89 (m, 2H), 1.76 – 1.62 (m, 2H), 1.54 (s, 3H), 1.36 (d,  $J = 13.7$  Hz, 1H), 1.33 (s, 3H), 1.30 (d,  $J = 14.0$  Hz, 1H), 1.14 (s, 3H), 0.98 (s, 3H);  $^{13}\text{C}$  NMR (125 MHz,  $\text{CDCl}_3$ )  $\delta$  194.0, 185.7, 170.4, 168.3, 137.5, 136.0, 135.6, 135.6, 133.0, 129.1, 128.4, 128.1, 124.1, 122.2, 117.7, 115.1, 88.6, 87.1, 41.8, 40.0, 39.9, 35.4, 35.4, 33.4, 32.7, 28.5, 28.2, 27.1, 20.6, 20.2; **HR-MS**:  $m/z$  Calcd. for  $\text{C}_{32}\text{H}_{38}\text{O}_4$  [ $\text{M}+\text{H}^+$ ]: 487.2828, Found 487.2836. ;  $[\alpha]_D^{22.7} = +91.6$  (c. 0.161,  $\text{CHCl}_3$ ).

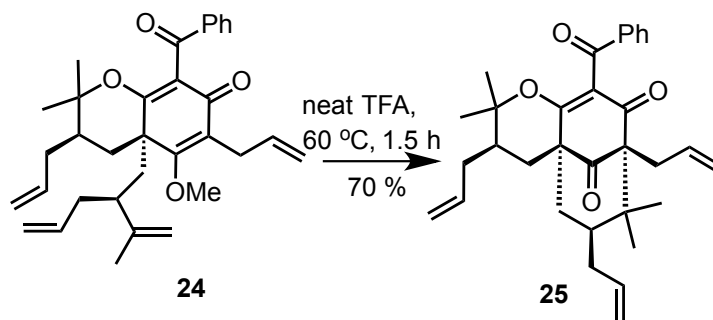

(+/-)-(3*R*,4*aS*,6*S*,8*R*)-3,6,8-Triallyl-10-benzoyl-2,2,7,7-tetramethyl-3,4,5,6,7,8-hexahydro-

2*H*,9*H*-4*a*,8-methanocycloocta[*b*]pyran-9,11-dione **25**: To a 20-mL scintillation vial containing pyranodienone **24** (55.1 mg, 0.110 mmol) was added TFA (4 mL). The vessel was then sealed and placed in a oil bath at 60 °C and stirred vigorously for 1.5 h. After cooling to room temperature, the reaction mixture was concentrated *in vacuo* and purified by column chromatography (silica gel, 2-10 % EtOAc/hexanes) to provide 37.4 mg (70 %) of C-cyclization product **25** as a white solid. **25**:  $R_f = 0.29$  (14 % EtOAc/hexanes); **m.p.** 137 – 139 °C ( $\text{CH}_2\text{Cl}_2$ ); IR  $\nu_{\max}$  2975, 2922, 2857, 1727, 1683, 1641, 1606, 1449, 1390, 1353, 1137, 1121, 915, 732  $\text{cm}^{-1}$ ;  $^1\text{H}$  NMR (500 MHz,  $\text{CDCl}_3$ )  $\delta$  7.77 – 7.70 (m, 2H), 7.55 – 7.48 (m, 1H), 7.42 – 7.34 (m, 2H), 5.83 – 5.66 (m, 2H), 5.61 (dddd,  $J = 17.1$ , 10.2, 6.9, 6.9 Hz, 1H), 5.16 – 4.96 (m, 6H), 2.68 (dd,  $J$

= 13.1, 7.2 Hz, 1H), 2.58 (dd,  $J = 12.8, 6.5$  Hz, 1H), 2.44 – 2.35 (m, 1H), 2.41 (dd,  $J = 13.8, 4.5$  Hz, 1H), 2.26 – 2.19 (m, 1H), 2.02 (dd,  $J = 14.0$  Hz, 2H), 2.08 – 2.00 (m, 1H), 1.87 (dddd,  $J = 13.4, 10.3, 2.9, 2.9$  Hz, 1H), 1.72 (dd,  $J = 14.6, 3.4$  Hz, 1H) 1.80 – 1.68 (m, 2H), 1.31 – 1.23 (m, 1H), 1.27 (s, 3H), 1.09 (s, 3H), 0.84 (s, 3H), 0.75 (s, 3H);  $^{13}\text{C}$  NMR (125 MHz,  $\text{CDCl}_3$ )  $\delta$  207.9, 193.7, 193.0, 169.8, 137.4, 136.8, 135.2, 134.4, 133.1, 128.9, 128.3, 126.1, 119.1, 117.8, 116.8, 85.4, 71.5, 49.7, 46.3, 40.3, 40.1, 38.6, 35.9, 33.7, 29.6, 28.4, 27.9, 22.2, 21.2, 15.9; **HR-MS**:  $m/z$  Calcd. for  $\text{C}_{32}\text{H}_{38}\text{O}_4$  [ $\text{M}+\text{Na}^+$ ]: 487.2848, Found 487.2849.

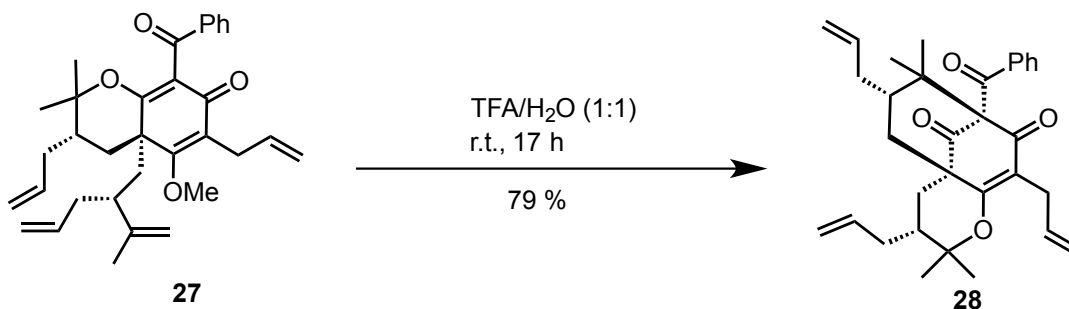

**(+/-)-(3R,4aS,6S,8R)-3,6,10-Triallyl-8-benzoyl-2,2,7,7-tetramethyl-3,4,5,6,7,8-hexahydro-2H,9H-4a,8-methanocycloocta[b]pyran-9,11-dione 28:** To a 20-mL scintillation vial containing pyranodienone **27** (5.1 mg, 0.0102 mmol) was added water (4.5 mL) and TFA (4.5 mL). The reaction mixture was allowed to stir for 17 h before concentrating *in vacuo* to provide C-cyclization product **28** (3.9 mg, 79 %) as a clear oil. **28**:  $R_f = 0.33$  (15 % EtOAc/hexanes); IR  $\nu_{\text{max}}$  3078, 2978, 2927, 2854, 1722, 1698, 1641, 1604, 1448, 1392, 1374, 1348, 1243, 1224, 1186, 1134, 1115, 995, 915, 732  $\text{cm}^{-1}$ ;  $^1\text{H}$  NMR (500 MHz,  $\text{CDCl}_3$ )  $\delta$  7.52 – 7.46 (m, 2H), 7.41 – 7.35 (m, 1H), 7.26 – 7.21 (m, 2H), 5.81 – 5.61 (m, 3H), 5.15 – 4.91 (m, 6H), 3.17 (dd,  $J = 13.5, 6.4$  Hz, 1H), 3.12 (dd,  $J = 13.5, 7.4$  Hz, 1H), 2.42 – 2.28 (m, 3H), 2.01 (dd,  $J = 13.9$  Hz, 1H), 1.97 – 1.90 (m, 1H), 1.80 (ddd,  $J = 13.9, 9.2$  Hz, 1H), 1.77 – 1.70 (m, 3H), 1.54 (s, 3H), 1.34 (s, 3H), 1.30 – 1.24 (m, 1H), 1.20 (s, 3H), 1.14 (s, 3H);  $^{13}\text{C}$  NMR (125 MHz,  $\text{CDCl}_3$ )  $\delta$  207.7, 193.5, 192.5, 167.5, 136.9, 136.8, 135.3, 135.2, 132.0, 128.2, 127.9, 123.3, 117.7, 116.7, 115.6, 84.1, 79.1, 50.9, 47.7, 41.4, 40.1, 38.8, 36.0, 32.6, 28.9, 28.2, 27.1, 23.0, 21.5, 16.1; **HR-MS**:  $m/z$  Calcd. for  $\text{C}_{32}\text{H}_{38}\text{O}_4$  [ $\text{M}+\text{H}^+$ ]: 487.2848, Found 487.2853.

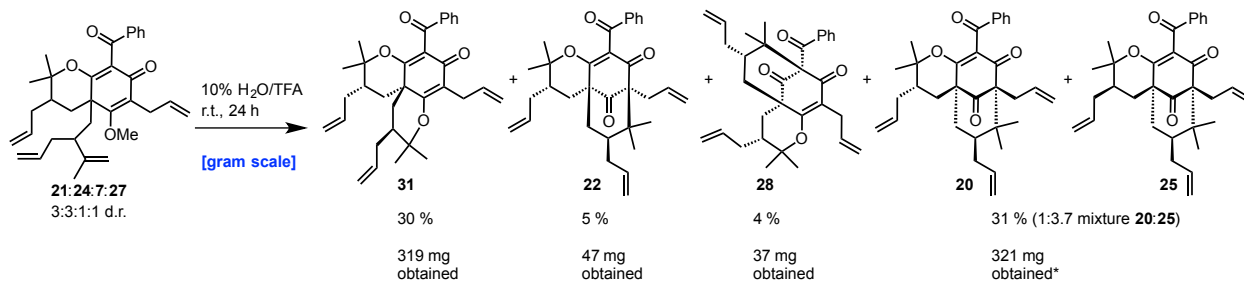

\*Column chromatography provided compounds **20** and **25** as a 1:3.7 mixture determined by <sup>1</sup>H NMR analysis.<sup>14</sup>

**Cyclization Products 20:25:22:28:31:** To a 500-mL round-bottom flask containing pyranodienones **21:24:7:27** (1.08 g, 2.16 mmol, 3:3:1:1 d.r. as determined by <sup>1</sup>H NMR analysis), was added TFA (120 mL). After 10 min, compounds **21:24:7:27** were fully dissolved in TFA, and water (12 mL) was then added dropwise over the course of 10 min. The reaction mixture stirred at room temperature for 24 h and was then concentrated *in vacuo*. Purification by column chromatography (silica gel, 0 – 12 % EtOAc/hexanes) provided 30-*epi*-13,14-didehydroxyisogarcinol core **22** (47 mg, 5 %) as a yellow solid, *O*-cyclization product **31** (319 mg, 30 %) as a white amorphous solid, and a mixture of cyclization products **20** and **25** (321 mg, 31 %, 1:3.7 mixture as determined by <sup>1</sup>H NMR analysis) as a white crystalline solid. Type A cyclization product **28** (90.5 mg, 41 % purity) was further purified by preparative thin layer chromatography (silica gel, ~2 elutions in 15 % EtOAc/hexanes) to provide 37 mg (4 %, 100 % purity) of **28** as a yellow oil. [Cyclization products **25** and **20** were separated by preparative thin layer chromatography (silica gel, ~10 elutions in 5 % EtOAc/hexanes; A single spot is cut into five sections, with the bottom two sections (compound **25**) and top two sections (compound **20**) are in most cases 100 % pure)].

## Olefin Metathesis:

### General Procedure E

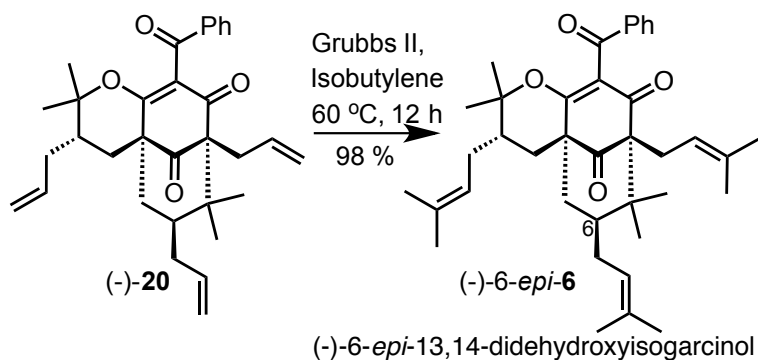

**(-)-6-*epi*-13,14-Didehydroxyisogarcinol (-)-6-*epi*-6:** To a flame-dried 30-mL glass pressure tube containing (-)-20 (16.8 mg, 0.0345 mmol) was added Grubbs 2<sup>nd</sup> generation catalyst (5.9 mg, 0.0069 mmol). The vessel was purged with argon, cooled to -78 °C, and filled with isobutylene (7 mL) which was condensed along the side of the tube. The reaction vessel was then sealed and warmed to 60 °C with vigorous stirring for 12 h. The reaction mixture was then re-cooled to -78 °C and opened to the air. The dry ice bath was then removed which allowed for the evaporation of isobutylene. Purification by column chromatography (silica gel, 2 – 10 % EtOAc/hexanes) provided 19.3 mg (98 %) of (-)-6-*epi*-13,14-didehydroxyisogarcinol [(-)-6-*epi*-6] as a clear oil. (-)-6-*epi*-6:  $R_f = 0.24$  (9 % EtOAc/hexanes); IR  $\nu_{\text{max}}$  2973, 2928, 2858, 1728, 1683, 1643, 1605, 1449, 1374, 1348, 1308, 1231, 1172, 1125, 1095, 984, 955, 831, 755  $\text{cm}^{-1}$ ;  $^1\text{H}$  NMR (500 MHz,  $\text{CDCl}_3$ )  $\delta$  7.81 – 7.66 (m, 2H), 7.56 – 7.46 (m, 1H), 7.43 – 7.32 (m, 2H), 5.22 – 5.15 (m, 1H), 5.06 (ddt,  $J = 8.6, 5.4, 1.7$  Hz, 1H), 4.87 (ddt,  $J = 8.2, 5.5, 1.6$  Hz, 1H), 3.03 (dd,  $J = 14.2, 3.7$  Hz, 1H), 2.68 (dd,  $J = 13.8, 8.0$  Hz, 1H), 2.52 – 2.31 (m, 1H), 2.23 – 2.15 (m, 1H), 2.15 (dd,  $J = 14.0, 4.7$  Hz, 1H), 2.06 – 1.97 (m, 2H), 1.84 – 1.67 (m, 2H), 1.77 (s, 3H), 1.70 (s, 3H), 1.64 (s, 3H), 1.60 (s, 6H), 1.58 (s, 3H), 1.47 (dd,  $J = 13.9, 12.4$  Hz, 1H), 1.41 (dddd,  $J = 9.9, 9.9, 3.7, 3.7$  Hz, 1H), 1.21 (s, 3H), 1.11 (s, 3H), 0.96 (dd,  $J = 14.2, 13.0$  Hz, 1H), 0.89 (s, 3H), 0.75 (s, 3H);  $^{13}\text{C}$  NMR (125 MHz,  $\text{CDCl}_3$ )  $\delta$  206.4, 194.0, 193.6, 170.9, 137.5, 134.3, 133.6, 133.2, 132.9, 128.8, 128.3, 126.8, 122.5, 121.4, 120.1, 86.8, 70.4, 52.8, 46.1, 42.9, 42.4, 40.8, 29.7, 28.5, 27.7, 27.7, 26.1, 25.8, 25.8, 24.8, 22.1, 21.3, 18.1, 18.0, 18.0, 16.2; **HR-MS:**  $m/z$  Calcd. for  $\text{C}_{38}\text{H}_{50}\text{O}_4$   $[\text{M}+\text{Na}^+]$ : 593.3607, Found 593.3607;  $[\alpha]_D^{26} = -144.59$  (c. 0.250,  $\text{CHCl}_3$ ).

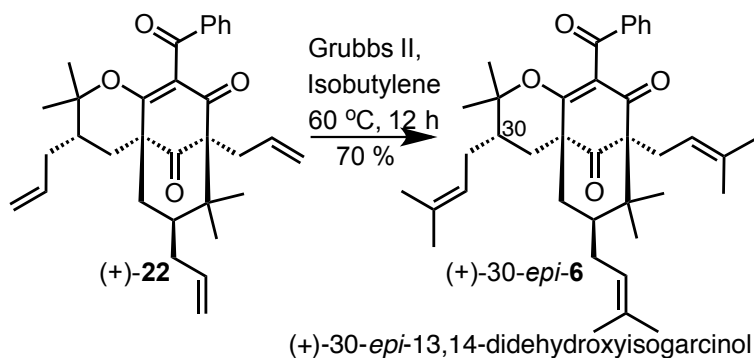

**(+)-30-epi-13,14-Didehydroxyisogarcinol (+)-30-epi-6:** Polyprenylated product **(+)-30-epi-6** (21.4 mg, 70 %) was afforded as a yellow oil and prepared according to general procedure E from Type B PPAP core **(+)-22** (26.0 mg, 0.0534 mmol) using Grubbs 2<sup>nd</sup> generation catalyst (18.2 mg, 0.0214 mmol) and isobutylene (10 mL) in a sealed pressure tube. **(+)-30-epi-6:**  $R_f = 0.29$  (12 % EtOAc/hexanes); IR  $\nu_{\max}$  2975, 2924, 2892, 2851, 1728, 1685, 1642, 1607, 1448, 1393, 1347, 1229, 1169, 1124, 959, 842, 756  $\text{cm}^{-1}$ ;  $^1\text{H}$  NMR (500 MHz,  $\text{CDCl}_3$ )  $\delta$  7.75 – 7.68 (m, 2H), 7.52 – 7.45 (m, 1H), 7.38 – 7.30 (m, 2H), 5.08 – 5.02 (m, 1H), 4.97 – 4.84 (m, 2H), 2.67 – 2.40 (m, 4H), 2.24 – 2.16 (m, 1H), 2.09 – 2.01 (m, 1H), 1.97 (dd,  $J = 14.4, 13.8$  Hz, 1H), 1.88 – 1.74 (m, 3H), 1.72 (s, 3H), 1.70 (s, 6H), 1.70 (s, 3H), 1.69 (s, 3H), 1.65 (dd,  $J = 14.5, 3.0$  Hz, 1H), 1.61 (s, 6H), 1.60 (s, 3H), 1.52 – 1.46 (m, 1H), 1.30 (s, 3H), 1.16 (s, 3H), 1.00 (s, 3H), 0.78 (s, 3H);  $^{13}\text{C}$  NMR (126 MHz,  $\text{CDCl}_3$ )  $\delta$  209.5, 193.8, 193.6, 170.4, 137.6, 134.5, 134.3, 133.1, 133.0, 128.7, 128.3, 125.0, 123.9, 121.2, 119.8, 85.4, 69.2, 48.4, 46.7, 46.4, 39.7, 38.0, 30.0, 29.2, 29.1, 28.0, 26.8, 26.1, 26.0, 25.8, 25.2, 22.3, 21.5, 18.2, 18.1, 17.9; **HR-MS:**  $m/z$  Calcd. for  $\text{C}_{38}\text{H}_{50}\text{O}_4$   $[\text{M}+\text{H}^+]$ : 571.3787, Found 571.3787;  $[\alpha]_D^{26} = -144.59$  (c. 0.250,  $\text{CHCl}_3$ ).

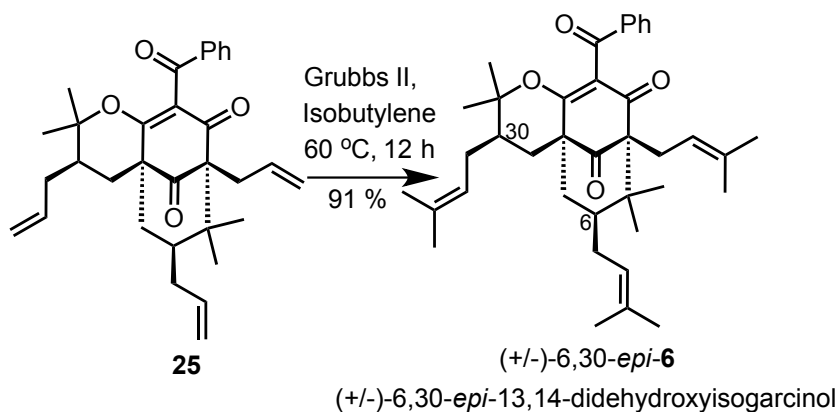

**(+/-)-6,30-epi-13,14-didehydroxyisogarcinol (+/-)-6,30-epi-6:** Polyprenylated product **(+/-)-6,30-epi-6** (10.7 mg, 91 %) was prepared according to general procedure E from Type B PPAP

core **25** (10.0 mg, 0.0206 mmol) using Grubbs 2<sup>nd</sup> generation catalyst (3.5 mg, 0.00411 mmol) and isobutylene (5 mL) in a sealed pressure tube. (+/-)-6,30-*epi*-**6**:  $R_f = 0.28$  (15 % EtOAc/hexanes); IR  $\nu_{\max}$  2977, 2929, 2857, 1726, 1683, 1644, 1609, 1449, 1377, 1347, 1310, 1226, 1173, 1124, 964, 917, 839, 763, 733  $\text{cm}^{-1}$ ;  $^1\text{H}$  NMR (400 MHz,  $\text{CDCl}_3$ )  $\delta$  7.83 – 7.65 (m, 2H), 7.57 – 7.45 (m, 1H), 7.42 – 7.32 (m, 2H), 5.17 – 5.02 (m, 2H), 4.86 (app t,  $J = 6.5$  Hz, 1H), 2.66 (dd,  $J = 13.6, 7.5$  Hz, 1H), 2.49 (dd,  $J = 13.7, 6.1$  Hz, 1H), 2.41 (dd,  $J = 13.6, 4.5$  Hz, 1H), 2.31 – 2.19 (m, 1H), 2.18 – 2.02 (m, 2H), 2.02 – 1.92 (m, 1H), 1.90 – 1.61 (m, 13H), 1.77 (s, 6H), 1.64 (s, 3H), 1.36 – 1.25 (m, 1H), 1.32 (s, 3H), 1.15 (s, 3H), 0.89 (s, 3H), 0.81 (s, 3H);  $^{13}\text{C}$  NMR (100 MHz,  $\text{CDCl}_3$ )  $\delta$  208.6, 193.9, 193.5, 169.8, 137.6, 134.2, 134.1, 133.3, 133.0, 128.8, 128.3, 125.8, 122.6, 121.2, 120.1, 85.4, 71.3, 49.8, 46.3, 41.5, 40.5, 39.6, 29.9, 28.6, 28.0, 27.8, 26.1, 25.8, 25.8, 24.4, 22.3, 21.3, 18.1, 18.0, 17.9, 16.0; **HR-MS**:  $m/z$  Calcd. for  $\text{C}_{38}\text{H}_{50}\text{O}_4$  [ $\text{M}+\text{Na}^+$ ]: 593.3607, Found 593.3611.

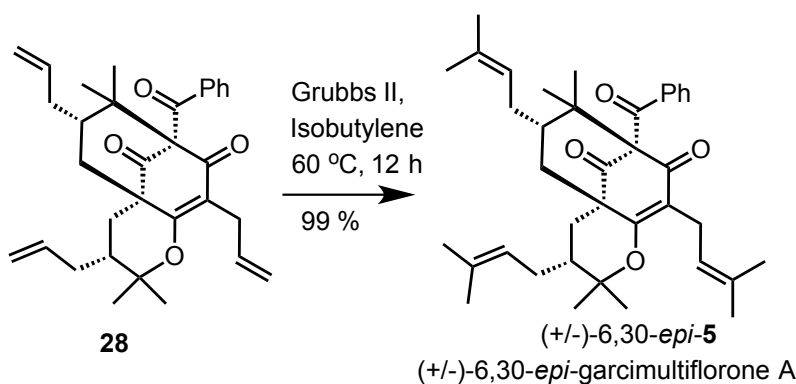

**6,30-*epi*-garcimultiflorone A 6,30-*epi*-5**: Polyprenylated product (+/-)-6,30-*epi*-**5** (18.9 mg, 99 %) was afforded as a white amorphous solid and was prepared according to general procedure E from **28** (16.3 mg, 0.0335 mmol) with Grubbs 2<sup>nd</sup> generation catalyst (5.7 mg, 0.0067 mmol), and isobutylene (5 mL). 6,30-*epi*-**5**:  $R_f = 0.51$  (10 % EtOAc/hexanes); IR  $\nu_{\max}$  2973, 2923, 2857, 1721, 1697, 1643, 1604, 1447, 1389, 1373, 1344, 1243, 1222, 1125, 1065, 1024, 850  $\text{cm}^{-1}$ ;  $^1\text{H}$  NMR (500 MHz,  $\text{CDCl}_3$ )  $\delta$  7.53 – 7.48 (m, 2H), 7.40 – 7.35 (m, 1H), 7.25 – 7.20 (m, 2H), 5.11 – 5.06 (m, 1H), 5.06 – 4.95 (m, 1H), 3.12 (dd,  $J = 13.6, 7.2$  Hz, 1H), 3.07 (dd,  $J = 13.6, 7.7$  Hz, 1H), 2.27 (dd,  $J = 13.5, 4.3$  Hz, 1H), 2.24 – 2.12 (m, 2H), 1.98 (dd,  $J = 14.3, 13.2$  Hz, 1H), 1.90 – 1.76 (m, 2H), 1.73 (s, 3H), 1.71 (s, 3H), 1.70 – 1.55 (unresolved m, 3H), 1.66 (br d,  $J = 1.4$  Hz, 3H), 1.64 (br d,  $J = 1.3$  Hz, 3H), 1.62 (s, 3H), 1.58 (s, 3H), 1.54 (s, 3H), 1.35 (s, 3H), 1.27 (dd,  $J = 13.6, 12.5$  Hz, 1H), 1.19 (s, 3H), 1.15 (s, 3H);  $^{13}\text{C}$  NMR (125 MHz,  $\text{CDCl}_3$ )  $\delta$  208.2, 193.6, 192.8, 167.0, 136.8, 134.2, 133.2, 131.9, 131.8, 128.2, 127.8, 124.5, 122.6, 121.3, 121.3, 84.0,

79.1, 51.0, 47.8, 42.7, 40.5, 39.8, 30.0, 29.0, 28.2, 26.7, 25.9, 25.8, 25.8, 23.0, 21.8, 21.2, 18.0, 17.9, 17.9, 16.1; **HR-MS**: *m/z* Calcd. for C<sub>38</sub>H<sub>50</sub>O<sub>4</sub> [M+H<sup>+</sup>]: 571.3787, Found 571.3789.

### III. References Cited

- S1. (a) Boyce, J. H.; Porco, J. A., Jr. *Angew. Chem. Int. Ed.* **2014**, *53*, 7832.  
S2. Kwon, M. S.; Sim, S. H.; Chung, Y. K.; Lee, E. *Tetrahedron*. 2011, *67*, 10179.  
S3. Only one enantiomer of (+/-)-**9A** is shown for clarity.  
S4. Grenning, A. J.; Boyce, J. H.; Porco, J. A., Jr. *J. Am. Chem. Soc.* **2014**, *136*, 11799.  
S5. (a) Surendra, K.; Corey, E. J. *J. Am. Chem. Soc.* 2012, *134*, 11992. (b) Surendra, K.; Rajendar, G.; Corey, E. J. *J. Am. Chem. Soc.* 2014, *136*, 642.

## IV. X-Ray Crystallographic Data

X-ray crystallographic data for compound (*meso*)-**9C**:

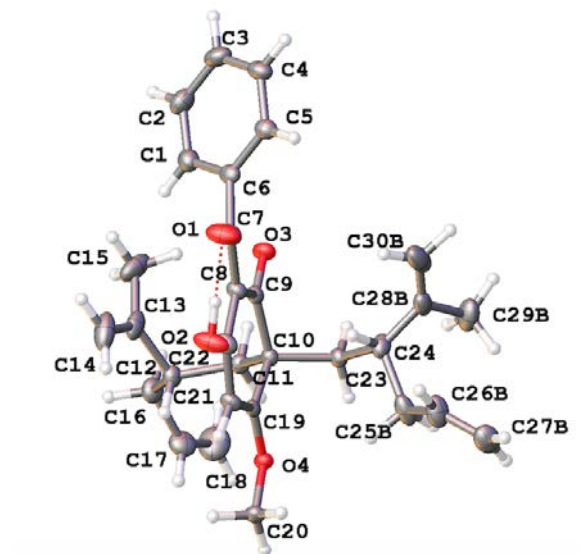

Crystals of compound (*meso*)-**9C** suitable for X-ray analysis were obtained in isooctane at  $-20$  °C over the course of 48 h. Crystallographic data have been deposited with the Cambridge Crystallographic Data Centre (CCDC # 1508478). Copies of the data can be obtained free of charge on application to the CCDC, 12 Union Road, Cambridge CB21EZ, UK (fax: (+44)-1223-336-033; e-mail: [deposit@ccdc.cam.ac.uk](mailto:deposit@ccdc.cam.ac.uk) ).

### Crystal data

|                                  |                                                         |
|----------------------------------|---------------------------------------------------------|
| $C_{30}H_{36}O_4$                | $F(000) = 1984$                                         |
| $M_r = 460.59$                   | $D_x = 1.151 \text{ Mg m}^{-3}$                         |
| Monoclinic, $P2_1/n$             | Cu $K\alpha$ radiation, $\lambda = 1.54178 \text{ \AA}$ |
| Hall symbol: $-P 2_1n$           | Cell parameters from 9698 reflections                   |
| $a = 14.1854 (2) \text{ \AA}$    | $\theta = 3.2\text{--}66.5^\circ$                       |
| $b = 19.4283 (3) \text{ \AA}$    | $\mu = 0.59 \text{ mm}^{-1}$                            |
| $c = 19.7516 (3) \text{ \AA}$    | $T = 100 \text{ K}$                                     |
| $\beta = 102.419 (1)^\circ$      | Block, colorless                                        |
| $V = 5316.13 (14) \text{ \AA}^3$ | $0.24 \times 0.20 \times 0.15 \text{ mm}$               |
| $Z = 8$                          |                                                         |



## Data collection

|                                                                      |                                                                        |
|----------------------------------------------------------------------|------------------------------------------------------------------------|
| Bruker Proteum-R diffractometer                                      | 9331 independent reflections                                           |
| Radiation source: rotating anode                                     | 8667 reflections with $I > 2\sigma(I)$                                 |
| Montel                                                               | $R_{\text{int}} = 0.040$                                               |
| $\omega$ and $\phi$ scans                                            | $\theta_{\text{max}} = 66.6^\circ$ , $\theta_{\text{min}} = 3.2^\circ$ |
| Absorption correction: multi-scan<br><i>SADABS</i> (Sheldrick, 2015) | $h = -16 \rightarrow 16$                                               |
| $T_{\text{min}} = 0.702$ , $T_{\text{max}} = 0.753$                  | $k = -23 \rightarrow 23$                                               |
| 53021 measured reflections                                           | $l = -23 \rightarrow 23$                                               |

## Refinement

|                                 |                                                                                   |
|---------------------------------|-----------------------------------------------------------------------------------|
| Refinement on $F^2$             | 8 restraints                                                                      |
| Least-squares matrix: full      | Hydrogen site location: mixed                                                     |
| $R[F^2 > 2\sigma(F^2)] = 0.041$ | H atoms treated by a mixture of independent and constrained refinement            |
| $wR(F^2) = 0.109$               | $w = 1/[\sigma^2(F_o^2) + (0.049P)^2 + 2.449P]$<br>where $P = (F_o^2 + 2F_c^2)/3$ |
| $S = 1.04$                      | $(\Delta/\sigma)_{\text{max}} = 0.001$                                            |
| 9331 reflections                | $\Delta_{\text{max}} = 0.43 \text{ e } \text{\AA}^{-3}$                           |
| 645 parameters                  | $\Delta_{\text{min}} = -0.23 \text{ e } \text{\AA}^{-3}$                          |

## Special details

**Geometry.** All esds (except the esd in the dihedral angle between two l.s. planes) are estimated using the full covariance matrix. The cell esds are taken into account individually in the estimation of esds in distances, angles and torsion angles; correlations between esds in cell parameters are only used when they are defined by crystal symmetry. An approximate (isotropic) treatment of cell esds is used for estimating esds involving l.s. planes.

**Refinement.** A two component disorder was refined on one of the two independent residues. The conformation of the minor component is a close match with the conformation of the second (non-disordered) residue. Pseudo-symmetry between the two residues is evident, with slight conformational variability seen in the pendant -C(=CH<sub>2</sub>)Me groups, leading to elongated atomic displacement ellipsoids. Refinement of these slight distortions as disorders would not improve the model significantly with regard to the goals of the study – unequivocal

identification of the bonding and determination of the relative stereochemistry.

CheckCIF Alerts and Discussion:

PLAT220\_ALERT\_2\_C Non-Solvent Resd 1 C Ueq(max)/Ueq(min) Range 3.2 Ratio

PLAT220\_ALERT\_2\_C Non-Solvent Resd 2 C Ueq(max)/Ueq(min) Range 3.1 Ratio

The pseudosymmetric distortion of the -C(=CH<sub>2</sub>)Me group ADPs, discussed above, give rise to these PLAT220 alerts.

**Fractional atomic coordinates and isotropic or equivalent isotropic displacement parameters (Å<sup>2</sup>)**

|      | x            | y           | z           | <i>U</i> <sub>iso</sub> */ <i>U</i> <sub>eq</sub> | Occ. (<1) |
|------|--------------|-------------|-------------|---------------------------------------------------|-----------|
| O4   | 1.09297 (6)  | 0.15715 (4) | 0.20805 (4) | 0.01925 (19)                                      |           |
| O104 | 0.64233 (6)  | 0.32305 (5) | 0.35483 (4) | 0.02131 (19)                                      |           |
| O103 | 0.35885 (6)  | 0.24222 (5) | 0.20792 (5) | 0.0232 (2)                                        |           |
| O3   | 0.88681 (6)  | 0.32151 (5) | 0.27426 (5) | 0.0232 (2)                                        |           |
| O1   | 1.12602 (7)  | 0.42870 (6) | 0.38743 (6) | 0.0372 (3)                                        |           |
| O101 | 0.51998 (7)  | 0.16489 (6) | 0.06906 (6) | 0.0398 (3)                                        |           |
| O2   | 1.22521 (7)  | 0.34941 (6) | 0.33734 (6) | 0.0372 (3)                                        |           |
| H2   | 1.2010 (15)  | 0.3822 (10) | 0.3624 (10) | 0.056*                                            |           |
| O102 | 0.65948 (7)  | 0.21588 (6) | 0.14434 (6) | 0.0378 (3)                                        |           |
| H102 | 0.6157 (14)  | 0.1927 (10) | 0.1111 (10) | 0.057*                                            |           |
| C19  | 1.08626 (9)  | 0.21714 (6) | 0.23984 (6) | 0.0169 (2)                                        |           |
| C109 | 0.44664 (9)  | 0.24816 (6) | 0.21797 (7) | 0.0182 (3)                                        |           |
| C119 | 0.60427 (9)  | 0.29128 (6) | 0.29524 (6) | 0.0180 (2)                                        |           |
| C10  | 0.98338 (8)  | 0.23316 (6) | 0.24247 (6) | 0.0173 (2)                                        |           |
| C108 | 0.50429 (9)  | 0.22348 (6) | 0.16996 (7) | 0.0211 (3)                                        |           |
| C8   | 1.05439 (9)  | 0.34271 (7) | 0.30989 (7) | 0.0208 (3)                                        |           |
| C123 | 0.45015 (9)  | 0.35309 (6) | 0.29421 (6) | 0.0188 (3)                                        |           |
| H12A | 0.3792       | 0.3470      | 0.2836      | 0.023*                                            |           |
| H12B | 0.4695       | 0.3676      | 0.3433      | 0.023*                                            |           |
| C121 | 0.65401 (9)  | 0.27063 (7) | 0.24785 (7) | 0.0220 (3)                                        |           |
| H121 | 0.7214       | 0.2790      | 0.2554      | 0.026*                                            |           |
| C122 | 0.60532 (10) | 0.23608 (7) | 0.18619 (7) | 0.0245 (3)                                        |           |
| C22  | 1.14657 (9)  | 0.31777 (7) | 0.30554 (7) | 0.0240 (3)                                        |           |
| C110 | 0.49696 (9)  | 0.28217 (6) | 0.28684 (6) | 0.0175 (2)                                        |           |

|      |              |             |             |            |  |
|------|--------------|-------------|-------------|------------|--|
| C5   | 0.94034 (10) | 0.46233 (7) | 0.41489 (7) | 0.0248 (3) |  |
| H5   | 0.9784       | 0.4444      | 0.4567      | 0.030*     |  |
| C107 | 0.46492 (10) | 0.18645 (7) | 0.10778 (7) | 0.0251 (3) |  |
| C106 | 0.36103 (9)  | 0.16794 (7) | 0.08309 (6) | 0.0209 (3) |  |
| C20  | 1.18870 (9)  | 0.13223 (7) | 0.20766 (7) | 0.0216 (3) |  |
| H20A | 1.1841       | 0.0880      | 0.1833      | 0.032*     |  |
| H20B | 1.2249       | 0.1262      | 0.2555      | 0.032*     |  |
| H20C | 1.2221       | 0.1656      | 0.1839      | 0.032*     |  |
| C9   | 0.96987 (9)  | 0.30364 (6) | 0.27532 (6) | 0.0182 (3) |  |
| C21  | 1.16168 (9)  | 0.25772 (7) | 0.26770 (6) | 0.0209 (3) |  |
| H21  | 1.2247       | 0.2464      | 0.2622      | 0.025*     |  |
| C113 | 0.43687 (10) | 0.10766 (7) | 0.33501 (7) | 0.0250 (3) |  |
| C101 | 0.28868 (10) | 0.21723 (7) | 0.06578 (7) | 0.0237 (3) |  |
| H101 | 0.3036       | 0.2646      | 0.0735      | 0.028*     |  |
| C112 | 0.51596 (9)  | 0.16169 (6) | 0.34855 (7) | 0.0218 (3) |  |
| H112 | 0.5531       | 0.1576      | 0.3110      | 0.026*     |  |
| C7   | 1.04977 (9)  | 0.40372 (7) | 0.35035 (7) | 0.0246 (3) |  |
| C11  | 0.91784 (9)  | 0.22771 (6) | 0.16877 (6) | 0.0194 (3) |  |
| H11A | 0.9117       | 0.1784      | 0.1558      | 0.023*     |  |
| H11B | 0.8527       | 0.2443      | 0.1712      | 0.023*     |  |
| C124 | 0.47444 (9)  | 0.41173 (6) | 0.24891 (7) | 0.0223 (3) |  |
| H124 | 0.5461       | 0.4123      | 0.2537      | 0.027*     |  |
| C6   | 0.96015 (9)  | 0.44358 (6) | 0.35126 (7) | 0.0226 (3) |  |
| C1   | 0.90411 (11) | 0.46971 (7) | 0.29041 (7) | 0.0293 (3) |  |
| H1   | 0.9164       | 0.4562      | 0.2469      | 0.035*     |  |
| C4   | 0.86474 (10) | 0.50724 (7) | 0.41709 (8) | 0.0295 (3) |  |
| H4   | 0.8504       | 0.5193      | 0.4604      | 0.035*     |  |
| C111 | 0.47551 (9)  | 0.23594 (6) | 0.34615 (7) | 0.0207 (3) |  |
| H11C | 0.5026       | 0.2586      | 0.3910      | 0.025*     |  |
| H11D | 0.4047       | 0.2333      | 0.3413      | 0.025*     |  |
| C105 | 0.33829 (10) | 0.09856 (7) | 0.07217 (7) | 0.0246 (3) |  |
| H105 | 0.3875       | 0.0647      | 0.0833      | 0.030*     |  |
| C12  | 0.95032 (10) | 0.26691 (7) | 0.11027 (7) | 0.0237 (3) |  |
| H12  | 1.0173       | 0.2516      | 0.1092      | 0.028*     |  |
| C23  | 0.94394 (9)  | 0.17787 (6) | 0.28671 (6) | 0.0203 (3) |  |
| H23A | 0.8737       | 0.1857      | 0.2812      | 0.024*     |  |
| H23B | 0.9520       | 0.1322      | 0.2665      | 0.024*     |  |

|      |              |             |             |            |  |
|------|--------------|-------------|-------------|------------|--|
| C117 | 0.62860 (10) | 0.07897 (7) | 0.42745 (8) | 0.0288 (3) |  |
| H117 | 0.6547       | 0.0605      | 0.3909      | 0.035*     |  |
| C102 | 0.19481 (10) | 0.19705 (8) | 0.03718 (7) | 0.0283 (3) |  |
| H10A | 0.1457       | 0.2308      | 0.0245      | 0.034*     |  |
| C116 | 0.58725 (10) | 0.14998 (7) | 0.41830 (7) | 0.0264 (3) |  |
| H11E | 0.6409       | 0.1834      | 0.4224      | 0.032*     |  |
| H11F | 0.5537       | 0.1595      | 0.4564      | 0.032*     |  |
| C114 | 0.42338 (11) | 0.06856 (7) | 0.27879 (8) | 0.0346 (3) |  |
| H11G | 0.3736       | 0.0349      | 0.2709      | 0.042*     |  |
| H11H | 0.4635       | 0.0742      | 0.2464      | 0.042*     |  |
| C120 | 0.74388 (9)  | 0.33981 (8) | 0.36805 (7) | 0.0263 (3) |  |
| H12C | 0.7562       | 0.3707      | 0.3317      | 0.039*     |  |
| H12D | 0.7816       | 0.2975      | 0.3682      | 0.039*     |  |
| H12E | 0.7628       | 0.3626      | 0.4132      | 0.039*     |  |
| C104 | 0.24385 (11) | 0.07889 (8) | 0.04513 (7) | 0.0299 (3) |  |
| H104 | 0.2282       | 0.0314      | 0.0390      | 0.036*     |  |
| C125 | 0.44502 (11) | 0.48058 (7) | 0.27786 (7) | 0.0292 (3) |  |
| H12F | 0.4450       | 0.5173      | 0.2431      | 0.035*     |  |
| H12G | 0.3785       | 0.4764      | 0.2855      | 0.035*     |  |
| C16  | 0.88347 (11) | 0.24729 (8) | 0.04002 (7) | 0.0298 (3) |  |
| H16A | 0.8165       | 0.2608      | 0.0410      | 0.036*     |  |
| H16B | 0.9033       | 0.2739      | 0.0026      | 0.036*     |  |
| C118 | 0.63140 (12) | 0.04026 (8) | 0.48258 (8) | 0.0376 (4) |  |
| H11I | 0.6060       | 0.0571      | 0.5201      | 0.045*     |  |
| H11J | 0.6589       | -0.0045     | 0.4848      | 0.045*     |  |
| C13  | 0.95213 (12) | 0.34425 (8) | 0.12025 (7) | 0.0341 (3) |  |
| C115 | 0.37547 (11) | 0.10088 (8) | 0.38799 (8) | 0.0342 (3) |  |
| H11K | 0.4165       | 0.0893      | 0.4331      | 0.051*     |  |
| H11L | 0.3276       | 0.0644      | 0.3738      | 0.051*     |  |
| H11M | 0.3423       | 0.1445      | 0.3916      | 0.051*     |  |
| C128 | 0.42852 (11) | 0.40433 (7) | 0.17257 (7) | 0.0295 (3) |  |
| C2   | 0.83020 (12) | 0.51563 (8) | 0.29312 (9) | 0.0368 (3) |  |
| H2A  | 0.7929       | 0.5344      | 0.2514      | 0.044*     |  |
| C103 | 0.17244 (10) | 0.12788 (8) | 0.02709 (7) | 0.0316 (3) |  |
| H103 | 0.1080       | 0.1142      | 0.0078      | 0.038*     |  |
| C3   | 0.81042 (11) | 0.53434 (8) | 0.35642 (9) | 0.0350 (3) |  |
| H3   | 0.7596       | 0.5657      | 0.3580      | 0.042*     |  |

|      |              |              |              |            |           |
|------|--------------|--------------|--------------|------------|-----------|
| C24  | 0.98847 (11) | 0.17426 (7)  | 0.36466 (7)  | 0.0286 (3) |           |
| H24  | 1.0013       | 0.2224       | 0.3823       | 0.034*     | 0.882 (2) |
| H24A | 1.0321       | 0.2153       | 0.3710       | 0.034*     | 0.118 (2) |
| C17  | 0.88491 (12) | 0.17269 (8)  | 0.02320 (8)  | 0.0368 (4) |           |
| H17  | 0.9454       | 0.1525       | 0.0216       | 0.044*     |           |
| C130 | 0.32064 (13) | 0.40750 (9)  | 0.15178 (9)  | 0.0412 (4) |           |
| H13A | 0.2927       | 0.3702       | 0.1746       | 0.062*     |           |
| H13B | 0.3004       | 0.4024       | 0.1014       | 0.062*     |           |
| H13C | 0.2982       | 0.4519       | 0.1658       | 0.062*     |           |
| C126 | 0.51127 (13) | 0.50079 (7)  | 0.34441 (9)  | 0.0396 (4) |           |
| H126 | 0.5750       | 0.5142       | 0.3423       | 0.048*     |           |
| C28A | 0.91265 (13) | 0.14225 (10) | 0.40038 (9)  | 0.0301 (4) | 0.882 (2) |
| C127 | 0.48875 (17) | 0.50156 (9)  | 0.40542 (9)  | 0.0536 (5) |           |
| H12H | 0.4258       | 0.4885       | 0.4098       | 0.064*     |           |
| H12I | 0.5354       | 0.5151       | 0.4452       | 0.064*     |           |
| C26B | 1.1339 (16)  | 0.1081 (11)  | 0.4460 (9)   | 0.0387 (6) | 0.118 (2) |
| H26B | 1.1647       | 0.1494       | 0.4647       | 0.046*     | 0.118 (2) |
| C30A | 0.87404 (15) | 0.17554 (12) | 0.44499 (10) | 0.0480 (5) | 0.882 (2) |
| H30A | 0.8279       | 0.1534       | 0.4660       | 0.058*     | 0.882 (2) |
| H30B | 0.8921       | 0.2219       | 0.4564       | 0.058*     | 0.882 (2) |
| C14  | 1.03420 (16) | 0.37891 (9)  | 0.13193 (8)  | 0.0503 (5) |           |
| H14A | 1.0339       | 0.4275       | 0.1374       | 0.060*     |           |
| H14B | 1.0936       | 0.3552       | 0.1349       | 0.060*     |           |
| C25A | 1.08282 (13) | 0.13442 (12) | 0.38212 (11) | 0.0353 (5) | 0.882 (2) |
| H25A | 1.0729       | 0.0883       | 0.3604       | 0.042*     | 0.882 (2) |
| H25B | 1.1319       | 0.1587       | 0.3622       | 0.042*     | 0.882 (2) |
| C27A | 1.13524 (18) | 0.06682 (14) | 0.49160 (14) | 0.0400 (6) | 0.882 (2) |
| H27A | 1.1224       | 0.0249       | 0.4665       | 0.048*     | 0.882 (2) |
| H27B | 1.1590       | 0.0660       | 0.5404       | 0.048*     | 0.882 (2) |
| C15  | 0.85652 (15) | 0.37957 (9)  | 0.11521 (9)  | 0.0483 (5) |           |
| H15A | 0.8177       | 0.3747       | 0.0680       | 0.072*     |           |
| H15B | 0.8672       | 0.4285       | 0.1263       | 0.072*     |           |
| H15C | 0.8223       | 0.3585       | 0.1481       | 0.072*     |           |
| C129 | 0.48330 (15) | 0.39616 (8)  | 0.12619 (8)  | 0.0424 (4) |           |
| H12J | 0.4541       | 0.3921       | 0.0783       | 0.051*     |           |
| H12K | 0.5516       | 0.3943       | 0.1410       | 0.051*     |           |
| C18  | 0.80813 (16) | 0.13267 (10) | 0.01038 (10) | 0.0542 (5) |           |

|      |              |              |              |            |           |
|------|--------------|--------------|--------------|------------|-----------|
| H18A | 0.7465       | 0.1511       | 0.0115       | 0.065*     |           |
| H18B | 0.8144       | 0.0854       | 0.0000       | 0.065*     |           |
| C29A | 0.88496 (14) | 0.06859 (10) | 0.38154 (11) | 0.0436 (5) | 0.882 (2) |
| H29A | 0.8644       | 0.0645       | 0.3311       | 0.065*     | 0.882 (2) |
| H29B | 0.8319       | 0.0549       | 0.4032       | 0.065*     | 0.882 (2) |
| H29C | 0.9407       | 0.0386       | 0.3981       | 0.065*     | 0.882 (2) |
| C30B | 0.9546 (11)  | 0.2325 (8)   | 0.4587 (7)   | 0.0480 (5) | 0.118 (2) |
| H30C | 0.9941       | 0.2702       | 0.4518       | 0.058*     | 0.118 (2) |
| H30D | 0.9216       | 0.2333       | 0.4958       | 0.058*     | 0.118 (2) |
| C28B | 0.9457 (9)   | 0.1809 (7)   | 0.4182 (6)   | 0.0301 (4) | 0.118 (2) |
| C29B | 0.8756 (11)  | 0.1212 (8)   | 0.4126 (9)   | 0.0436 (5) | 0.118 (2) |
| H29D | 0.8419       | 0.1155       | 0.3641       | 0.065*     | 0.118 (2) |
| H29E | 0.8284       | 0.1306       | 0.4411       | 0.065*     | 0.118 (2) |
| H29F | 0.9111       | 0.0790       | 0.4289       | 0.065*     | 0.118 (2) |
| C25B | 1.0652 (12)  | 0.1121 (9)   | 0.3762 (9)   | 0.0353 (5) | 0.118 (2) |
| H25C | 1.0289       | 0.0682       | 0.3684       | 0.042*     | 0.118 (2) |
| H25D | 1.1039       | 0.1155       | 0.3402       | 0.042*     | 0.118 (2) |
| C26A | 1.12007 (17) | 0.12617 (13) | 0.45869 (11) | 0.0387 (6) | 0.882 (2) |
| H26A | 1.1338       | 0.1669       | 0.4856       | 0.046*     | 0.882 (2) |
| C27B | 1.1535 (18)  | 0.0528 (12)  | 0.4818 (13)  | 0.0400 (6) | 0.118 (2) |
| H27C | 1.1240       | 0.0105       | 0.4646       | 0.048*     | 0.118 (2) |
| H27D | 1.1976       | 0.0541       | 0.5254       | 0.048*     | 0.118 (2) |

X-ray crystallographic data for compound **25**:

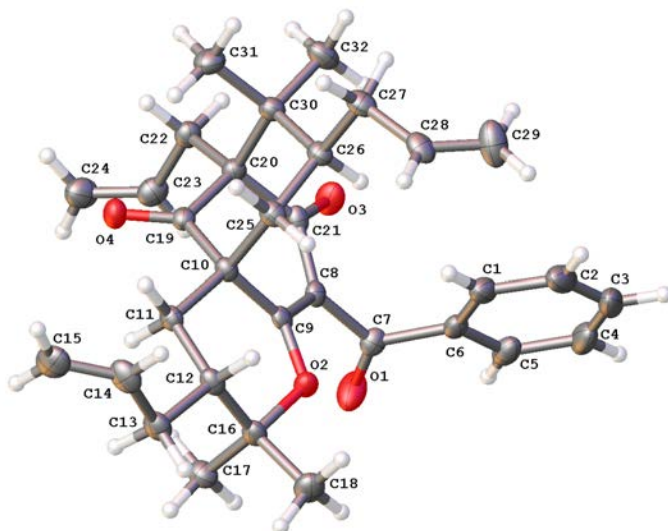

Crystals of compound **25** suitable for X-ray analysis were obtained by slow evaporation from isooctane. Crystallographic data have been deposited with the Cambridge Crystallographic Data Centre (CCDC # 1508479). Copies of the data can be obtained free of charge on application to the CCDC, 12 Union Road, Cambridge CB21EZ, UK (fax: (+44)-1223-336-033; e-mail: [deposit@ccdc.cam.ac.uk](mailto:deposit@ccdc.cam.ac.uk) ).

### Crystal data

|                                  |                                                         |
|----------------------------------|---------------------------------------------------------|
| $C_{32}H_{38}O_4$                | $F(000) = 1048$                                         |
| $M_r = 486.62$                   | $D_x = 1.172 \text{ Mg m}^{-3}$                         |
| Orthorhombic, $Pca2_1$           | Cu $K\alpha$ radiation, $\lambda = 1.54178 \text{ \AA}$ |
| Hall symbol: P 2c -2ac           | Cell parameters from 9398 reflections                   |
| $a = 23.1187 (4) \text{ \AA}$    | $\theta = 3.8\text{--}66.5^\circ$                       |
| $b = 7.8379 (2) \text{ \AA}$     | $\mu = 0.60 \text{ mm}^{-1}$                            |
| $c = 15.2175 (3) \text{ \AA}$    | $T = 100 \text{ K}$                                     |
| $V = 2757.44 (10) \text{ \AA}^3$ | Prism, colorless                                        |
| $Z = 4$                          | $0.19 \times 0.14 \times 0.08 \text{ mm}$               |

## Data collection

|                                                                      |                                                                        |
|----------------------------------------------------------------------|------------------------------------------------------------------------|
| Bruker Proteum-R diffractometer                                      | 4823 independent reflections                                           |
| Radiation source: rotating anode                                     | 4762 reflections with $I > 2\sigma(I)$                                 |
| Montel                                                               | $R_{\text{int}} = 0.049$                                               |
| $\omega$ and $\phi$ scans                                            | $\theta_{\text{max}} = 66.7^\circ$ , $\theta_{\text{min}} = 3.8^\circ$ |
| Absorption correction: multi-scan<br><i>SADABS</i> (Sheldrick, 2015) | $h = -27 \rightarrow 27$                                               |
| $T_{\text{min}} = 0.793$ , $T_{\text{max}} = 0.864$                  | $k = -9 \rightarrow 9$                                                 |
| 71181 measured reflections                                           | $l = -18 \rightarrow 17$                                               |

## Refinement

|                                 |                                                                                   |
|---------------------------------|-----------------------------------------------------------------------------------|
| Refinement on $F^2$             | Hydrogen site location: inferred from neighbouring sites                          |
| Least-squares matrix: full      | H-atom parameters constrained                                                     |
| $R[F^2 > 2\sigma(F^2)] = 0.029$ | $w = 1/[\sigma^2(F_o^2) + (0.039P)^2 + 0.691P]$<br>where $P = (F_o^2 + 2F_c^2)/3$ |
| $wR(F^2) = 0.077$               | $(\Delta/\sigma)_{\text{max}} < 0.001$                                            |
| $S = 1.04$                      | $\Delta_{\text{max}} = 0.19 \text{ e } \text{\AA}^{-3}$                           |
| 4823 reflections                | $\Delta_{\text{min}} = -0.13 \text{ e } \text{\AA}^{-3}$                          |
| 330 parameters                  | Absolute structure: Refined as an inversion twin.                                 |
| 1 restraint                     | Flack parameter: 0.49 (19)                                                        |

## Special details

**Geometry.** All esds (except the esd in the dihedral angle between two l.s. planes) are estimated using the full covariance matrix. The cell esds are taken into account individually in the estimation of esds in distances, angles and torsion angles; correlations between esds in cell parameters are only used when they are defined by crystal symmetry. An approximate (isotropic) treatment of cell esds is used for estimating esds involving l.s. planes.

**Refinement.** Refined as a 2-component inversion twin.

CheckCIF Alert and Discussion:

Alert level C STRVA01\_ALERT\_4\_C Flack test results are ambiguous. From the CIF: `_refine_ls_abs_structure_Flack` 0.490 From the CIF: `_refine_ls_abs_structure_Flack_su` 0.190



Discussion: Since the structure is composed of only light atoms, the anomalous dispersion 'signal' is weak, resulting in the relatively large s.u. for the Flack parameter. Nonetheless, refinement of the structure as an inversion twin significantly improved all of the relevant metrics for model quality including R1, wR2 and the GOOF. Despite high s.u.'s, the Flack parameter, the Hooft  $\gamma$  and the refined twin fraction all agree fairly well. Since the structure is racemic, identification of the absolute structure has no relevance to the results.

### Fractional atomic coordinates and isotropic or equivalent isotropic displacement parameters ( $\text{\AA}^2$ )

|      | <i>x</i>    | <i>y</i>     | <i>z</i>     | $U_{\text{iso}}^*/U_{\text{eq}}$ |
|------|-------------|--------------|--------------|----------------------------------|
| O2   | 0.41587 (6) | 0.57164 (18) | 0.63038 (9)  | 0.0228 (3)                       |
| O4   | 0.26372 (5) | 0.55694 (18) | 0.44008 (10) | 0.0276 (3)                       |
| O3   | 0.41522 (6) | 0.19463 (18) | 0.39632 (11) | 0.0306 (3)                       |
| O1   | 0.43755 (7) | 0.1629 (2)   | 0.61676 (13) | 0.0416 (4)                       |
| C10  | 0.35369 (8) | 0.6453 (2)   | 0.50397 (13) | 0.0189 (4)                       |
| C19  | 0.31561 (8) | 0.5411 (2)   | 0.44236 (13) | 0.0197 (4)                       |
| C9   | 0.39375 (7) | 0.5256 (2)   | 0.55223 (13) | 0.0189 (4)                       |
| C21  | 0.39550 (8) | 0.3256 (2)   | 0.42847 (14) | 0.0213 (4)                       |
| C8   | 0.41377 (7) | 0.3805 (2)   | 0.51564 (13) | 0.0194 (4)                       |
| C26  | 0.42174 (8) | 0.6715 (2)   | 0.36698 (13) | 0.0217 (4)                       |
| H26  | 0.4508      | 0.5930       | 0.3940       | 0.026*                           |
| C7   | 0.45546 (8) | 0.2645 (2)   | 0.56343 (13) | 0.0230 (4)                       |
| C16  | 0.38173 (8) | 0.6750 (3)   | 0.69382 (13) | 0.0238 (4)                       |
| C6   | 0.51833 (8) | 0.2759 (3)   | 0.54256 (13) | 0.0254 (4)                       |
| C12  | 0.35278 (9) | 0.8211 (3)   | 0.64295 (14) | 0.0228 (4)                       |
| H12  | 0.3843      | 0.8925       | 0.6169       | 0.027*                           |
| C25  | 0.39072 (8) | 0.7628 (2)   | 0.44318 (13) | 0.0225 (4)                       |
| H25A | 0.3652      | 0.8519       | 0.4182       | 0.027*                           |
| H25B | 0.4202      | 0.8210       | 0.4797       | 0.027*                           |
| C11  | 0.31685 (8) | 0.7515 (2)   | 0.56749 (13) | 0.0213 (4)                       |
| H11A | 0.2990      | 0.8476       | 0.5351       | 0.026*                           |
| H11B | 0.2853      | 0.6797       | 0.5913       | 0.026*                           |
| C20  | 0.34878 (8) | 0.4285 (2)   | 0.37886 (13) | 0.0207 (4)                       |
| C17  | 0.33976 (9) | 0.5523 (3)   | 0.73804 (15) | 0.0291 (5)                       |
| H17A | 0.3128      | 0.5071       | 0.6942       | 0.044*                           |
| H17B | 0.3181      | 0.6129       | 0.7838       | 0.044*                           |

|      |              |            |              |            |
|------|--------------|------------|--------------|------------|
| H17C | 0.3614       | 0.4580     | 0.7646       | 0.044*     |
| C13  | 0.31620 (9)  | 0.9380 (3) | 0.70229 (14) | 0.0283 (5) |
| H13A | 0.2826       | 0.8733     | 0.7249       | 0.034*     |
| H13B | 0.3397       | 0.9748     | 0.7532       | 0.034*     |
| C22  | 0.30803 (9)  | 0.3014 (3) | 0.33305 (14) | 0.0250 (4) |
| H22A | 0.2779       | 0.3660     | 0.3011       | 0.030*     |
| H22B | 0.3304       | 0.2355     | 0.2892       | 0.030*     |
| C23  | 0.27924 (10) | 0.1793 (3) | 0.39519 (15) | 0.0292 (5) |
| H23  | 0.3032       | 0.1185     | 0.4351       | 0.035*     |
| C14  | 0.29518 (10) | 1.0924 (3) | 0.65330 (15) | 0.0326 (5) |
| H14  | 0.3236       | 1.1666     | 0.6292       | 0.039*     |
| C28  | 0.50541 (9)  | 0.8776 (3) | 0.36545 (15) | 0.0286 (5) |
| H28  | 0.4967       | 0.9610     | 0.4087       | 0.034*     |
| C30  | 0.37978 (9)  | 0.5584 (3) | 0.31189 (14) | 0.0239 (4) |
| C5   | 0.55341 (9)  | 0.1354 (3) | 0.56228 (15) | 0.0342 (5) |
| H5   | 0.5370       | 0.0359     | 0.5878       | 0.041*     |
| C1   | 0.54274 (9)  | 0.4214 (3) | 0.50662 (14) | 0.0334 (5) |
| H1   | 0.5192       | 0.5173     | 0.4931       | 0.040*     |
| C27  | 0.45603 (10) | 0.8054 (3) | 0.31318 (14) | 0.0275 (5) |
| H27A | 0.4712       | 0.7515     | 0.2591       | 0.033*     |
| H27B | 0.4297       | 0.8990     | 0.2955       | 0.033*     |
| C31  | 0.33416 (10) | 0.6675 (3) | 0.26447 (15) | 0.0319 (5) |
| H31A | 0.3110       | 0.7295     | 0.3080       | 0.048*     |
| H31B | 0.3089       | 0.5934     | 0.2296       | 0.048*     |
| H31C | 0.3535       | 0.7492     | 0.2256       | 0.048*     |
| C32  | 0.41365 (10) | 0.4580 (3) | 0.24271 (15) | 0.0328 (5) |
| H32A | 0.4321       | 0.5376     | 0.2017       | 0.049*     |
| H32B | 0.3872       | 0.3830     | 0.2105       | 0.049*     |
| H32C | 0.4434       | 0.3890     | 0.2717       | 0.049*     |
| C18  | 0.42750 (10) | 0.7368 (3) | 0.75764 (15) | 0.0332 (5) |
| H18A | 0.4494       | 0.6389     | 0.7799       | 0.050*     |
| H18B | 0.4089       | 0.7959     | 0.8068       | 0.050*     |
| H18C | 0.4538       | 0.8154     | 0.7274       | 0.050*     |
| C15  | 0.24075 (11) | 1.1329 (3) | 0.64120 (16) | 0.0389 (6) |
| H15A | 0.2111       | 1.0620     | 0.6643       | 0.047*     |
| H15B | 0.2310       | 1.2331     | 0.6094       | 0.047*     |
| C24  | 0.22383 (10) | 0.1505 (3) | 0.39844 (17) | 0.0372 (5) |

|      |              |            |              |            |
|------|--------------|------------|--------------|------------|
| H24A | 0.1985       | 0.2090     | 0.3596       | 0.045*     |
| H24B | 0.2087       | 0.0712     | 0.4397       | 0.045*     |
| C4   | 0.61223 (10) | 0.1417 (4) | 0.54450 (17) | 0.0475 (7) |
| H4   | 0.6360       | 0.0457     | 0.5569       | 0.057*     |
| C29  | 0.55912 (11) | 0.8339 (3) | 0.3556 (2)   | 0.0468 (7) |
| H29A | 0.5694       | 0.7508     | 0.3129       | 0.056*     |
| H29B | 0.5882       | 0.8850     | 0.3911       | 0.056*     |
| C2   | 0.60231 (11) | 0.4264 (4) | 0.49030 (17) | 0.0467 (7) |
| H2   | 0.6193       | 0.5264     | 0.4663       | 0.056*     |
| C3   | 0.63625 (11) | 0.2871 (5) | 0.50889 (17) | 0.0525 (8) |
| H3   | 0.6766       | 0.2910     | 0.4971       | 0.063*     |

X-ray crystallographic data for compound (+/-)-**22**:

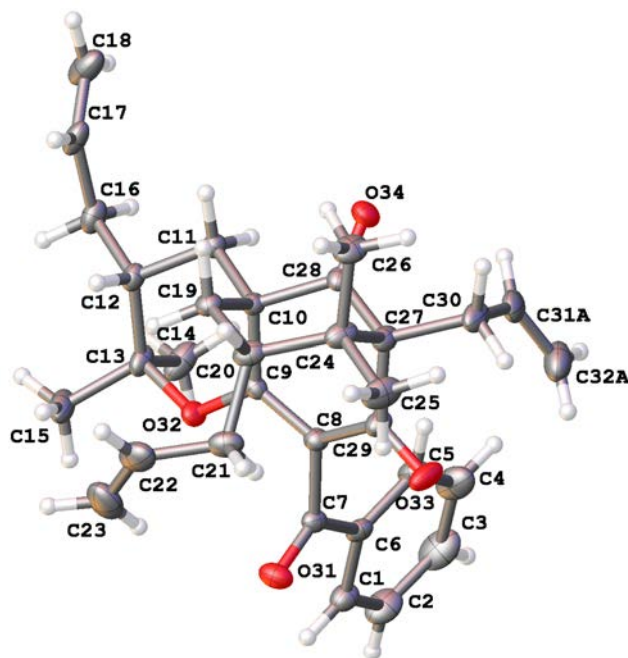

Crystals of compound (+/-)-**22** suitable for X-ray analysis were obtained by slow evaporation from isooctane. Crystallographic data have been deposited with the Cambridge Crystallographic Data Centre (CCDC # 1508480). Copies of the data can be obtained free of charge on application to the CCDC, 12 Union Road, Cambridge CB21EZ, UK (fax: (+44)-1223-336-033; e-mail: [deposit@ccdc.cam.ac.uk](mailto:deposit@ccdc.cam.ac.uk) ).

### Crystal data

|                                                |                                |
|------------------------------------------------|--------------------------------|
| C <sub>32</sub> H <sub>38</sub> O <sub>4</sub> | V = 2727.8 (4) Å <sup>3</sup>  |
| Mr = 486.62                                    | Z = 4                          |
| Monoclinic, P2 <sub>1</sub> /n                 | Cu Kα radiation, λ = 1.54178 Å |
| a = 10.9732 (10) Å                             | m = 0.60 mm <sup>-1</sup>      |
| b = 16.0101 (14) Å                             | T = 100 K                      |
| c = 15.5863 (14) Å                             | 0.4 × 0.3 × 0.25 mm            |
| β = 94.993 (3)°                                |                                |

### Data collection

|                                                               |                                 |
|---------------------------------------------------------------|---------------------------------|
| Bruker Proteum-R diffractometer                               | 4803 independent reflections    |
| Absorption correction: multi-scan<br>SADABS (Sheldrick, 2015) | 4745 reflections with I > 2σ(I) |
| T <sub>min</sub> = 0.829, T <sub>max</sub> = 0.861            | R <sub>int</sub> = 0.049        |
| 88704 measured reflections                                    |                                 |

### Refinement

|                                                 |                                             |
|-------------------------------------------------|---------------------------------------------|
| R[F <sub>2</sub> > 2σ(F <sub>2</sub> )] = 0.039 | 0 restraints                                |
| wR(F <sub>2</sub> ) = 0.096                     | H-atom parameters constrained               |
| S = 1.05                                        | D <sub>pmax</sub> = 0.25 e Å <sup>-3</sup>  |
| 4803 reflections                                | D <sub>pmin</sub> = -0.22 e Å <sup>-3</sup> |
| 348 parameters                                  |                                             |

Data collection: APEX2 (Bruker, 2006); cell refinement: SAINT (Bruker, 2006); data reduction: SAINT (Bruker, 2006); program(s) used to solve structure: SHELXT (Sheldrick, 2015); program(s) used to refine structure: SHELXL2014/7 (Sheldrick, 2014); molecular graphics: Olex2 (Dolomanov et al., 2009); software used to prepare material for publication: Olex2 (Dolomanov et al., 2009).

### References

Sheldrick, G. M., et al. (2015). Comparison of silver and molybdenum microfocus X-ray sources for single-crystal structure determination. *J. Appl. Cryst.* 48, 3-10 (2015).  
Sheldrick, G. M. (2008). A Brief History of SHELX. *Acta Cryst.* A64, 112-122 (2008).  
Sheldrick, G. M. (2015). Crystal Structure Refinement with SHELXL. *Acta Cryst.* C71, 3-8 (2015).  
Sheldrick, G. M. (2015). *Acta Cryst.* C71, 3-8.  
Bruker (2006). SAINT. Bruker Analytical X-ray Instruments Inc., Madison, Wisconsin, USA.  
Bruker (2006). APEX2. Bruker Analytical X-ray Instruments Inc., Madison, Wisconsin, USA.  
Bruker (2006). SADABS. Bruker Analytical X-ray Instruments Inc., Madison, Wisconsin, USA.  
Dolmanov, O. V., et al. (2009). OLEX2: A complete structure solution, refinement and analysis program. *J. Appl. Cryst.* 42, 339-341 (2009).  
Document origin: publCIF [Westrip, S. P. (2010). *J. Apply. Cryst.*, 43, 920-925].

supporting information

S1. Introduction

S2. Experimental

S2.1. Synthesis and crystallization

S2.2. Refinement

Crystal data, data collection and structure refinement details are summarized in Table 1.

S3. Results and discussion

(boyce6\_0m)

### Crystal data

|                               |                                                |
|-------------------------------|------------------------------------------------|
| C32H38O4                      | F(000) = 1048                                  |
| Mr = 486.62                   | Dx = 1.185 Mg m <sup>-3</sup>                  |
| Monoclinic, P21/n             | Cu K $\alpha$ radiation, $\lambda$ = 1.54178 Å |
| a = 10.9732 (10) Å            | Cell parameters from 9577 reflections          |
| b = 16.0101 (14) Å            | $q = 2.8\text{--}66.3^\circ$                   |
| c = 15.5863 (14) Å            | $m = 0.60\text{ mm}^{-1}$                      |
| $\beta = 94.993 (3)^\circ$    | T = 100 K                                      |
| V = 2727.8 (4) Å <sup>3</sup> | Prism, colorless                               |
| Z = 4                         | 0.4 × 0.3 × 0.25 mm                            |

### Data collection

|                                                               |                                                |
|---------------------------------------------------------------|------------------------------------------------|
| Bruker Proteum-R diffractometer                               | 4803 independent reflections                   |
| Radiation source: rotating anode                              | 4745 reflections with $I > 2s(I)$              |
| Montel monochromator                                          | $R_{int} = 0.049$                              |
| $\omega$ and $\phi$ scans                                     | $q_{max} = 66.7^\circ$ , $q_{min} = 4.9^\circ$ |
| Absorption correction: multi-scan<br>SADABS (Sheldrick, 2015) | $h = -13\text{--}13$                           |
| $T_{min} = 0.829$ , $T_{max} = 0.861$                         | $k = -17\text{--}18$                           |
| 88704 measured reflections                                    | $l = -18\text{--}18$                           |

### Refinement

|                              |                                                                              |
|------------------------------|------------------------------------------------------------------------------|
| Refinement on F <sup>2</sup> | 0 restraints                                                                 |
| Least-squares matrix: full   | Hydrogen site location: inferred from neighbouring sites                     |
| $R[F_2 > 2s(F_2)] = 0.039$   | H-atom parameters constrained                                                |
| $wR(F_2) = 0.096$            | $w = 1/[s^2(F_o^2) + (0.042P)^2 + 1.182P]$<br>where $P = (F_o^2 + 2F_c^2)/3$ |
| S = 1.05                     | (D/s) <sub>max</sub> = 0.001                                                 |
| 4803 reflections             | $D_{pmax} = 0.25\text{ e \AA}^{-3}$                                          |
| 348 parameters               | $D_{pmin} = -0.22\text{ e \AA}^{-3}$                                         |

### Special details

Geometry. All esds (except the esd in the dihedral angle between two l.s. planes) are

estimated using the full covariance matrix. The cell esds are taken into account individually in the estimation of esds in distances, angles and torsion angles; correlations between esds in cell parameters are only used when they are defined by crystal symmetry. An approximate (isotropic) treatment of cell esds is used for estimating esds involving l.s. planes.

Refinement. CheckCIF Alert and Discussion:

PLAT230\_ALERT\_2\_C Hirshfeld Test Diff for C2 – C3 .. 5.4 s.u.

Discussion: The disorder at C31—C32 most likely creates two slightly different orientations of the phenyl ring containing C2—C3. Refinement of this disorder would only increase the number of parameters without any significant effect on either model quality or on the structural information needed for this study.

Fractional atomic coordinates and isotropic or equivalent isotropic displacement parameters ( $\text{\AA}^2$ ) for (boyce6\_0m)

|      | x            | y           | z           | Uiso*/Ueq    | Occ. (<1) |
|------|--------------|-------------|-------------|--------------|-----------|
| O32  | 0.40162 (7)  | 0.61725 (5) | 0.75037 (5) | 0.02160 (19) |           |
| O34  | 0.20176 (8)  | 0.61749 (5) | 0.48014 (5) | 0.0258 (2)   |           |
| O31  | 0.33969 (8)  | 0.78687 (6) | 0.83505 (5) | 0.0263 (2)   |           |
| O33  | 0.14828 (8)  | 0.83476 (5) | 0.66303 (6) | 0.0326 (2)   |           |
| C9   | 0.31575 (9)  | 0.64635 (7) | 0.69214 (7) | 0.0162 (2)   |           |
| C10  | 0.24796 (10) | 0.58712 (7) | 0.62971 (7) | 0.0165 (2)   |           |
| C28  | 0.19072 (10) | 0.63780 (7) | 0.55396 (7) | 0.0187 (2)   |           |
| C7   | 0.36261 (10) | 0.78331 (7) | 0.76035 (7) | 0.0180 (2)   |           |
| C11  | 0.33705 (10) | 0.52147 (7) | 0.60060 (7) | 0.0187 (2)   |           |
| H11A | 0.2907       | 0.4783      | 0.5659      | 0.022*       |           |
| H11B | 0.3945       | 0.5484      | 0.5635      | 0.022*       |           |
| C8   | 0.28892 (10) | 0.72829 (7) | 0.69641 (7) | 0.0177 (2)   |           |
| C6   | 0.46616 (10) | 0.83072 (7) | 0.72841 (7) | 0.0191 (2)   |           |
| C12  | 0.40968 (10) | 0.47981 (7) | 0.67707 (7) | 0.0201 (2)   |           |
| H12  | 0.3497       | 0.4513      | 0.7120      | 0.024*       |           |
| C19  | 0.13752 (10) | 0.54612 (7) | 0.67000 (7) | 0.0196 (2)   |           |
| H19A | 0.1021       | 0.5030      | 0.6296      | 0.024*       |           |
| H19B | 0.1687       | 0.5172      | 0.7236      | 0.024*       |           |
| C29  | 0.18159 (11) | 0.76347 (7) | 0.64889 (8) | 0.0223 (3)   |           |
| C1   | 0.55286      | 0.86663 (8) | 0.78825 (8) | 0.0248 (3)   |           |

|      |                  |             |                 |            |           |
|------|------------------|-------------|-----------------|------------|-----------|
|      | (11)             |             |                 |            |           |
| H1   | 0.5437           | 0.8620      | 0.8481          | 0.030*     |           |
| C27  | 0.11072<br>(11)  | 0.70999 (7) | 0.57876 (8)     | 0.0222 (3) |           |
| C13  | 0.47956<br>(11)  | 0.54418 (7) | 0.73566 (8)     | 0.0237 (3) |           |
| C20  | 0.03386<br>(10)  | 0.60604 (8) | 0.69144 (8)     | 0.0234 (3) |           |
| H20  | -0.0386          | 0.5688      | 0.6955          | 0.028*     |           |
| C24  | -0.00591<br>(10) | 0.66690 (8) | 0.61546 (8)     | 0.0252 (3) |           |
| C5   | 0.47908<br>(12)  | 0.83864 (8) | 0.64078 (8)     | 0.0267 (3) |           |
| H5   | 0.4209           | 0.8137      | 0.5998          | 0.032*     |           |
| C16  | 0.49586<br>(11)  | 0.41234 (8) | 0.64639 (9)     | 0.0263 (3) |           |
| H16A | 0.5530           | 0.4384      | 0.6085          | 0.032*     |           |
| H16B | 0.5449           | 0.3887      | 0.6969          | 0.032*     |           |
| C17  | 0.42798<br>(12)  | 0.34324 (7) | 0.59842 (8)     | 0.0273 (3) |           |
| H17  | 0.3547           | 0.3240      | 0.6202          | 0.033*     |           |
| C30  | 0.07728<br>(12)  | 0.76840 (8) | 0.50066 (9)     | 0.0303 (3) |           |
| H30A | 0.0205           | 0.7387      | 0.4583          | 0.036*     | 0.691 (6) |
| H30B | 0.0341           | 0.8181      | 0.5206          | 0.036*     | 0.691 (6) |
| H30C | 0.0539           | 0.7339      | 0.4491          | 0.036*     | 0.309 (6) |
| H30D | 0.0057           | 0.8028      | 0.5124          | 0.036*     | 0.309 (6) |
| C26  | -0.07497<br>(11) | 0.61515 (8) | 0.54294 (9)     | 0.0305 (3) |           |
| H26A | -0.1055          | 0.6524      | 0.4960          | 0.046*     |           |
| H26B | -0.1440          | 0.5862      | 0.5657          | 0.046*     |           |
| H26C | -0.0192          | 0.5740      | 0.5211          | 0.046*     |           |
| C21  | 0.05471<br>(11)  | 0.64684 (8) | 0.78203 (8)     | 0.0275 (3) |           |
| H21A | 0.1166           | 0.6916      | 0.7803          | 0.033*     |           |
| H21B | -0.0226          | 0.6728      | 0.7968          | 0.033*     |           |
| C2   | 0.65170<br>(12)  | 0.90870 (9) | 0.76059<br>(10) | 0.0357 (3) |           |
| H2   | 0.7118           | 0.9318      | 0.8014          | 0.043*     |           |
| C14  | 0.59189<br>(12)  | 0.58149 (8) | 0.69945<br>(10) | 0.0344 (3) |           |
| H14A | 0.5700           | 0.6012      | 0.6406          | 0.052*     |           |
| H14B | 0.6558           | 0.5388      | 0.6989          | 0.052*     |           |
| H14C | 0.6221           | 0.6285      | 0.7355          | 0.052*     |           |

|      |                  |                 |                 |             |           |
|------|------------------|-----------------|-----------------|-------------|-----------|
| C4   | 0.57699<br>(14)  | 0.88291 (9)     | 0.61335<br>(10) | 0.0386 (3)  |           |
| H4   | 0.5848           | 0.8896          | 0.5535          | 0.046*      |           |
| C15  | 0.50789<br>(14)  | 0.51033 (8)     | 0.82657 (9)     | 0.0356 (3)  |           |
| H15A | 0.5505           | 0.5532          | 0.8627          | 0.053*      |           |
| H15B | 0.5600           | 0.4608          | 0.8247          | 0.053*      |           |
| H15C | 0.4314           | 0.4952          | 0.8508          | 0.053*      |           |
| C22  | 0.09661<br>(14)  | 0.58548 (9)     | 0.85049 (9)     | 0.0366 (3)  |           |
| H22  | 0.0464           | 0.5381          | 0.8579          | 0.044*      |           |
| C25  | -0.09582<br>(12) | 0.73319 (9)     | 0.64336<br>(10) | 0.0364 (3)  |           |
| H25A | -0.0528          | 0.7715          | 0.6846          | 0.055*      |           |
| H25B | -0.1625          | 0.7057          | 0.6705          | 0.055*      |           |
| H25C | -0.1295          | 0.7646          | 0.5928          | 0.055*      |           |
| C3   | 0.66347<br>(13)  | 0.91739 (9)     | 0.67319<br>(11) | 0.0425 (4)  |           |
| H3   | 0.7311           | 0.9471          | 0.6542          | 0.051*      |           |
| C23  | 0.19857<br>(16)  | 0.59254<br>(11) | 0.90143 (9)     | 0.0453 (4)  |           |
| H23A | 0.2509           | 0.6391          | 0.8958          | 0.054*      |           |
| H23B | 0.2196           | 0.5511          | 0.9437          | 0.054*      |           |
| C18  | 0.46165<br>(15)  | 0.30709 (9)     | 0.52873<br>(10) | 0.0405 (4)  |           |
| H18A | 0.5343           | 0.3245          | 0.5050          | 0.049*      |           |
| H18B | 0.4133           | 0.2635          | 0.5020          | 0.049*      |           |
| C31A | 0.1896 (4)       | 0.7971 (2)      | 0.4562 (2)      | 0.0323 (9)  | 0.691 (6) |
| H31A | 0.2245           | 0.7592          | 0.4183          | 0.039*      | 0.691 (6) |
| C32A | 0.2403 (3)       | 0.87139<br>(16) | 0.46782<br>(16) | 0.0446 (9)  | 0.691 (6) |
| H32A | 0.2074           | 0.9105          | 0.5054          | 0.054*      | 0.691 (6) |
| H32B | 0.3098           | 0.8858          | 0.4386          | 0.054*      | 0.691 (6) |
| C32B | 0.2431 (6)       | 0.8101 (3)      | 0.4155 (5)      | 0.0420 (18) | 0.309 (6) |
| H32C | 0.2235           | 0.7639          | 0.3786          | 0.050*      | 0.309 (6) |
| H32D | 0.3085           | 0.8463          | 0.4045          | 0.050*      | 0.309 (6) |
| C31B | 0.1792 (8)       | 0.8239 (5)      | 0.4825 (5)      | 0.032 (2)   | 0.309 (6) |
| H31B | 0.1993           | 0.8702          | 0.5192          | 0.038*      | 0.309 (6) |



## Section V: Select Spectra

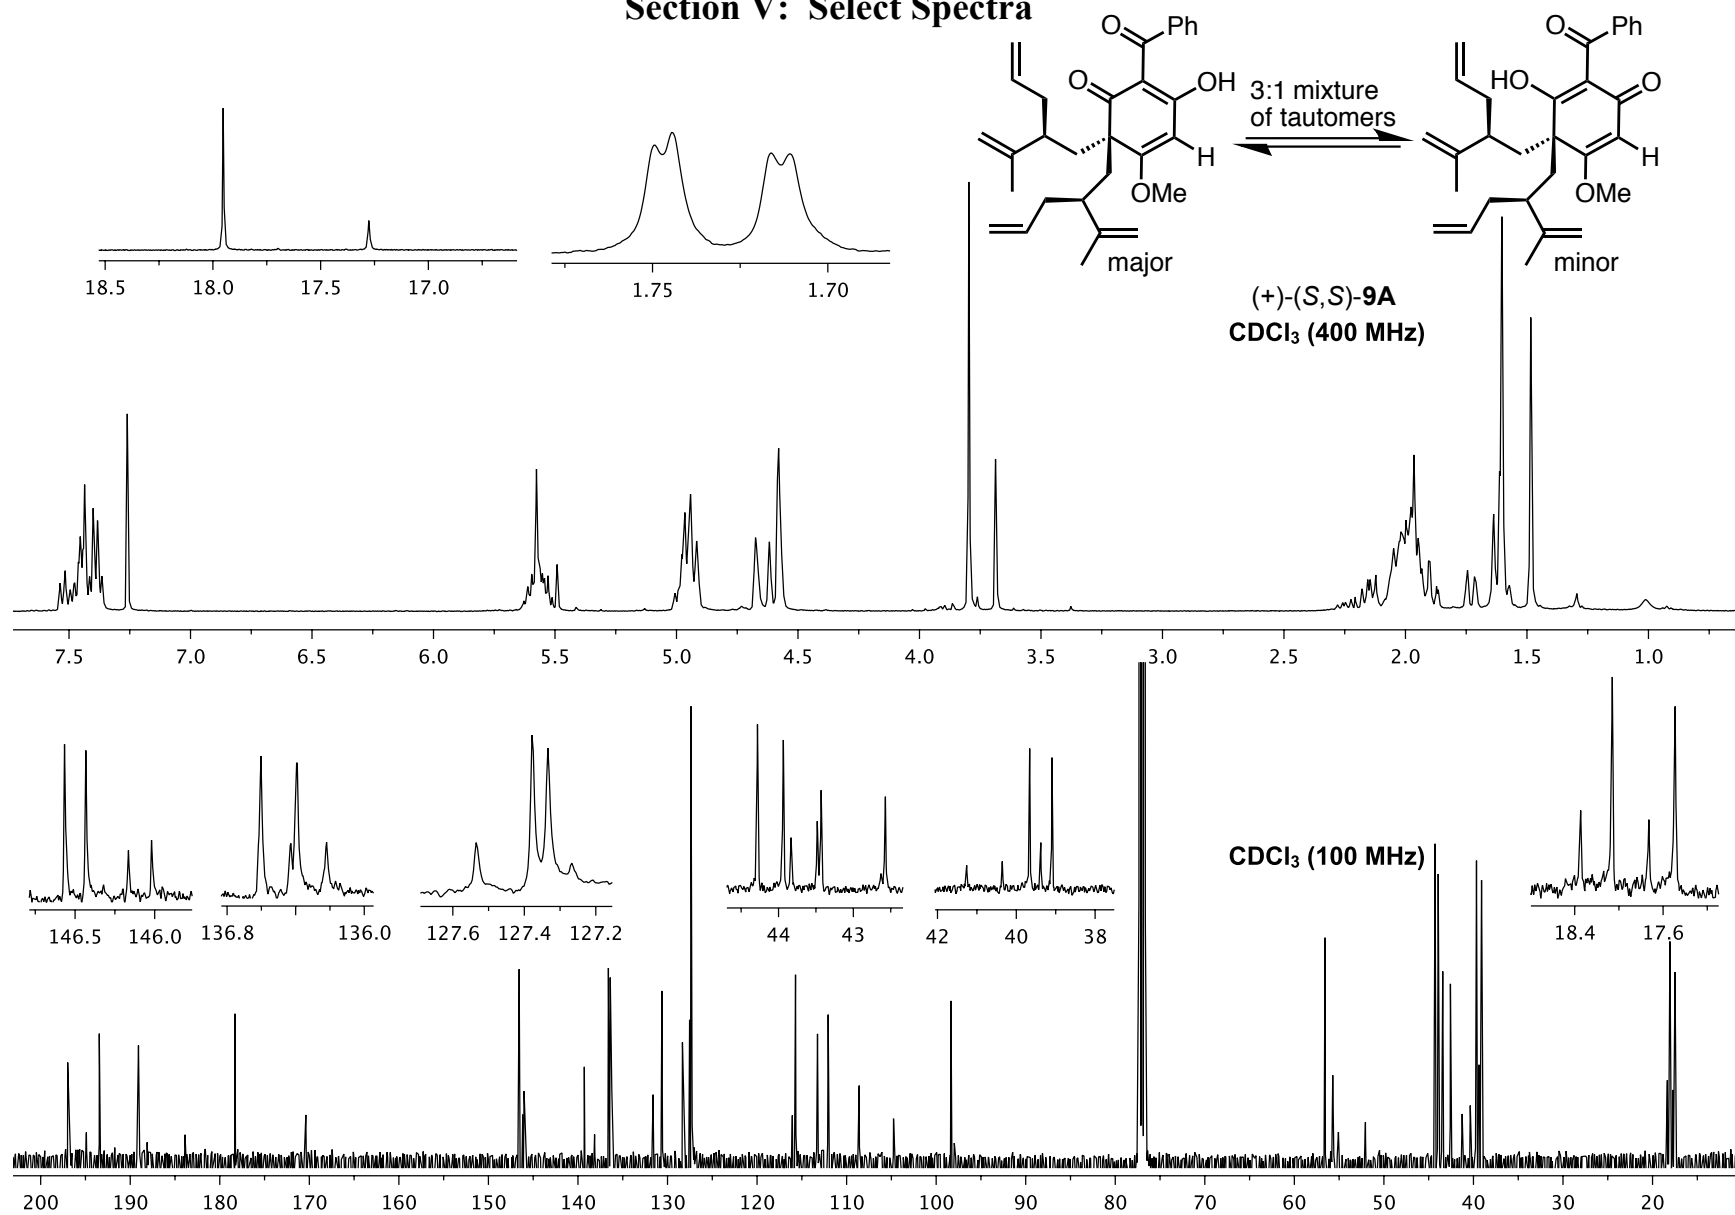

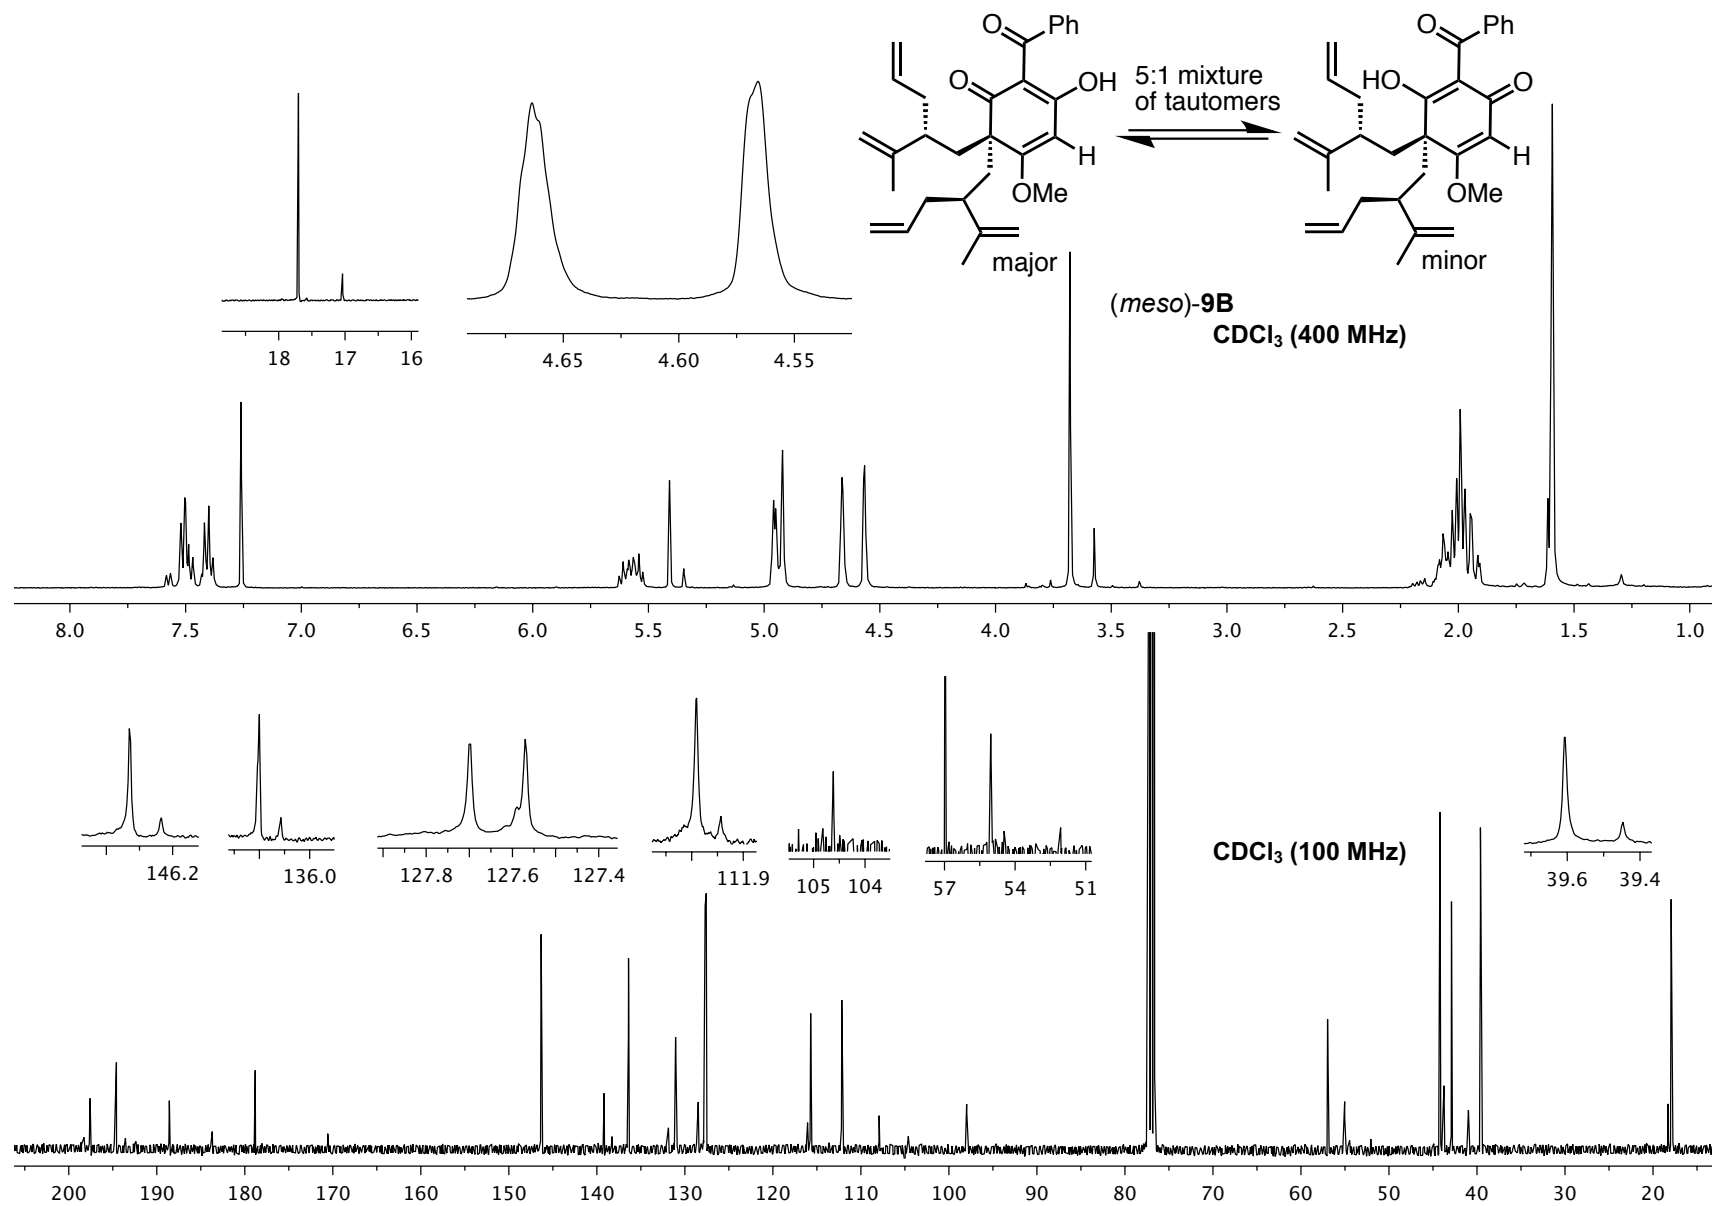

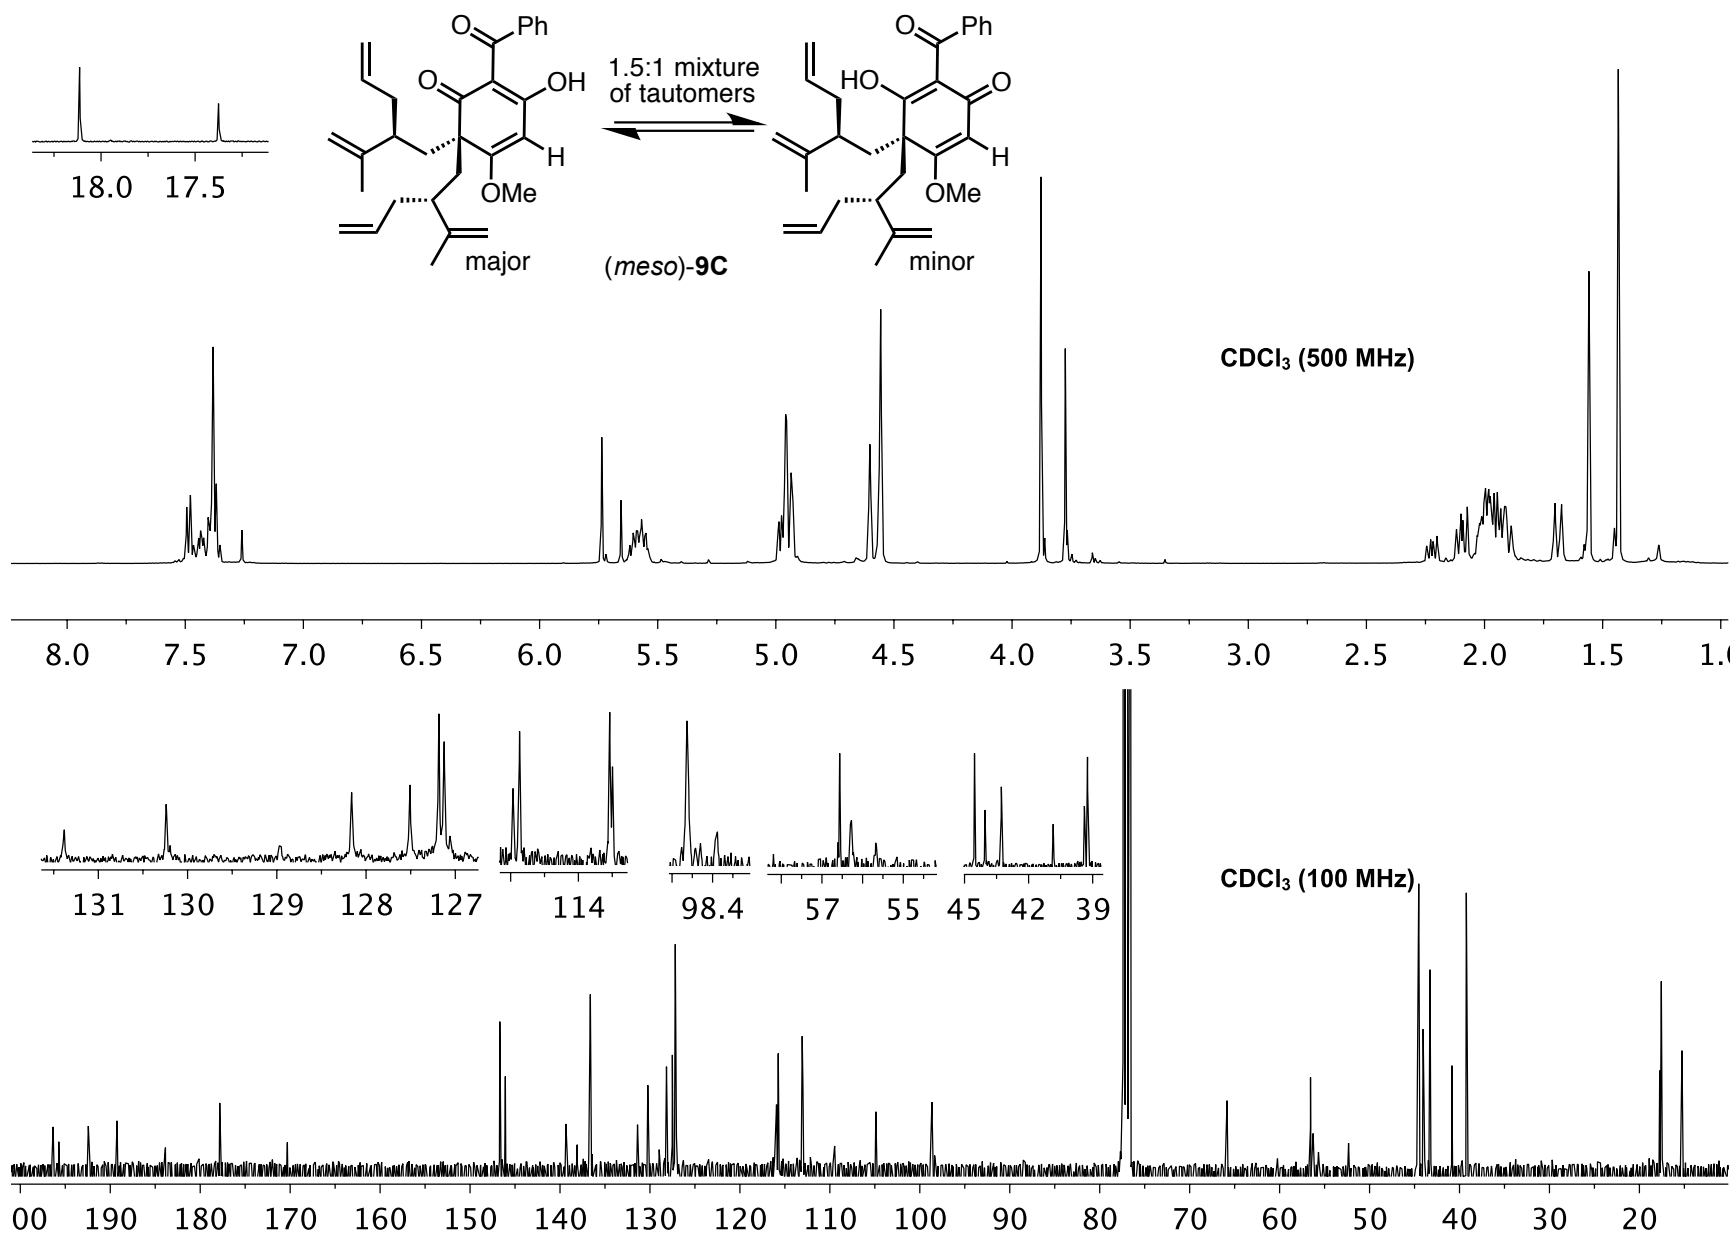

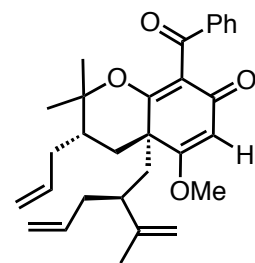

(-)-8  
CDCl<sub>3</sub> (500 MHz)

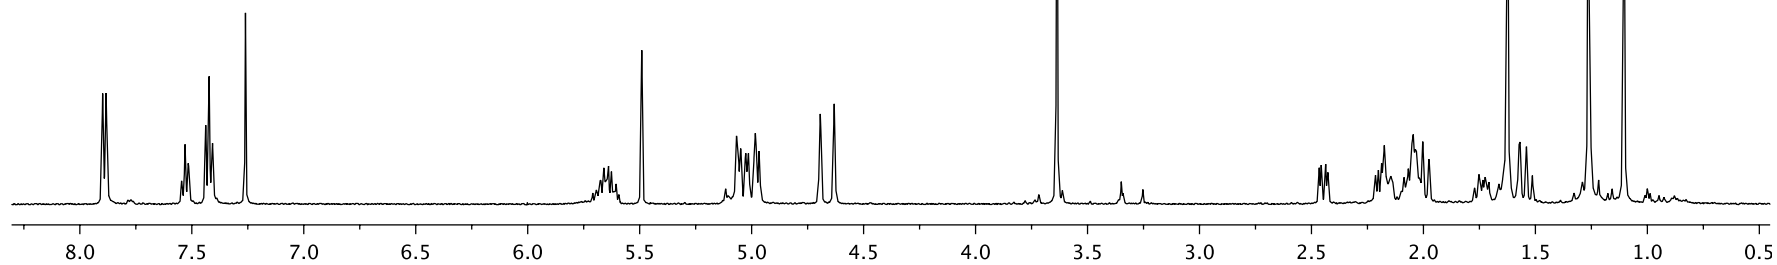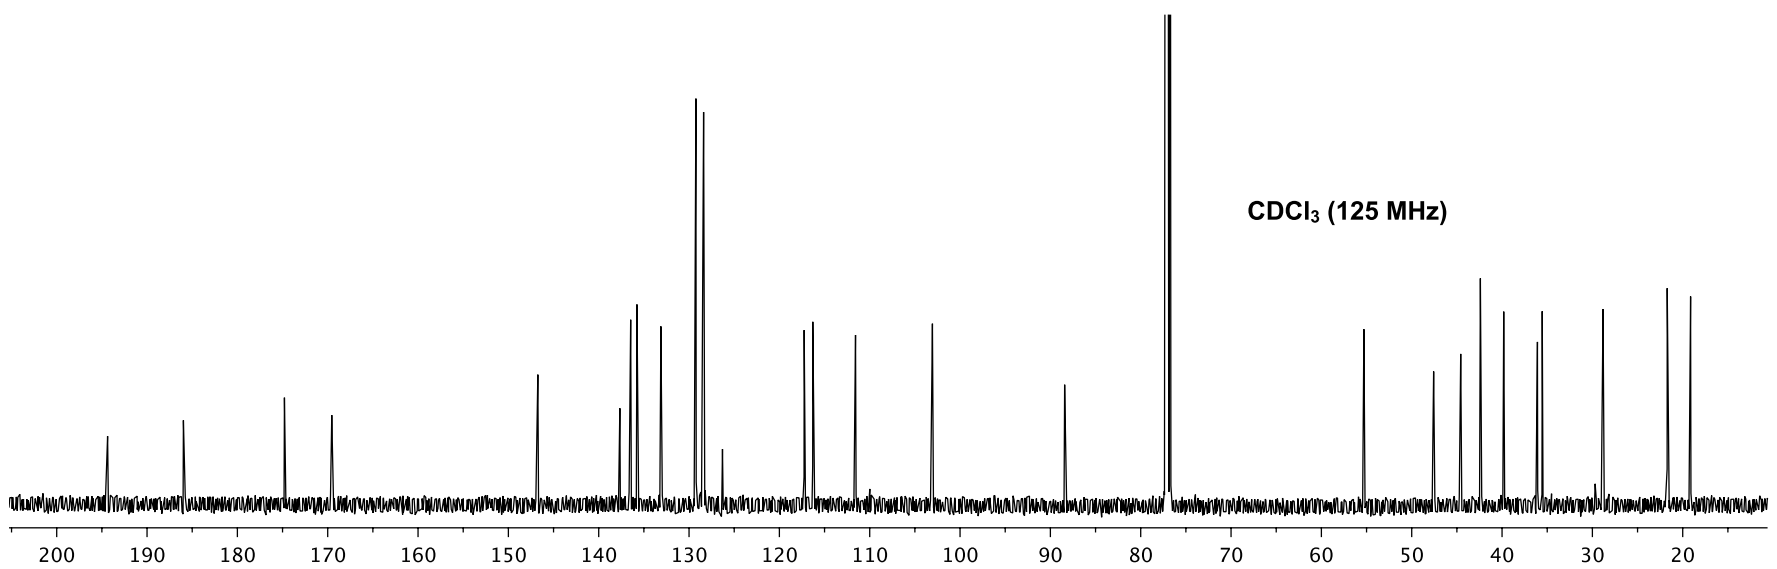

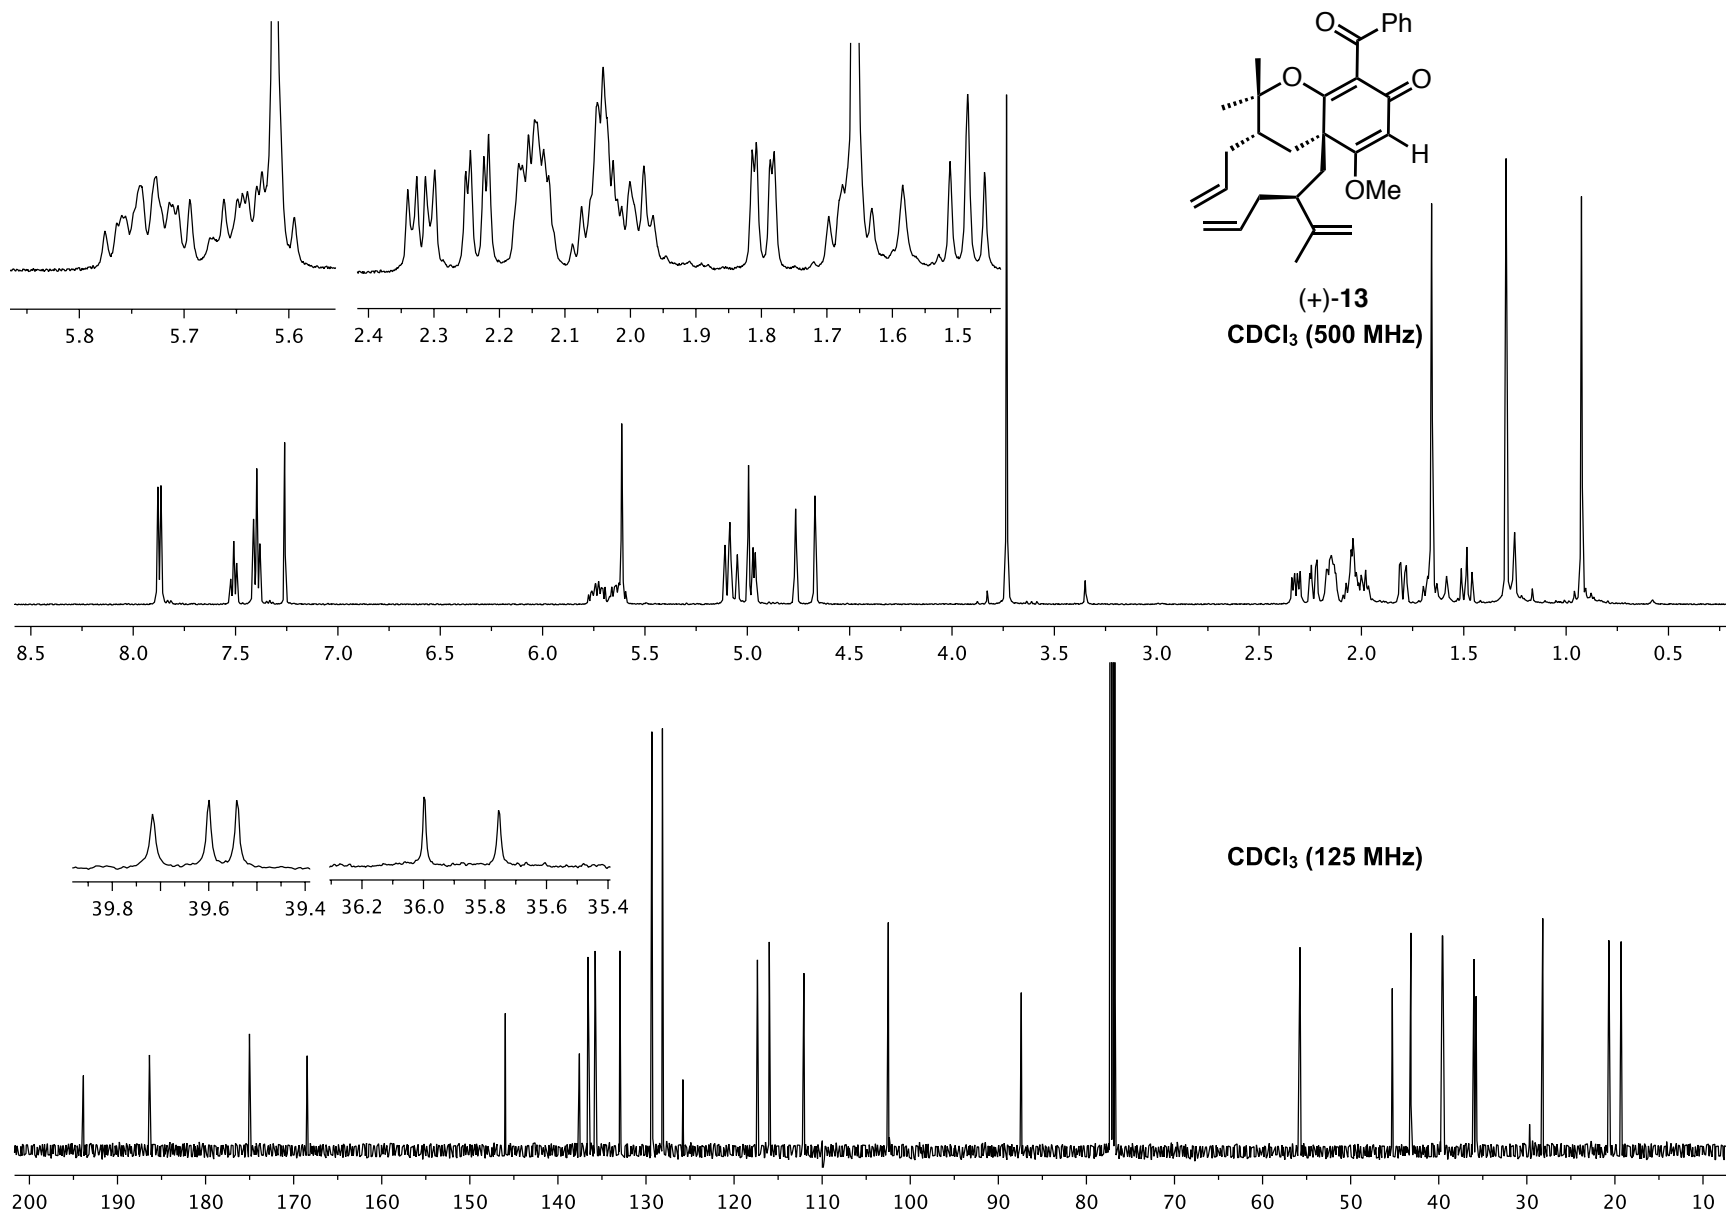

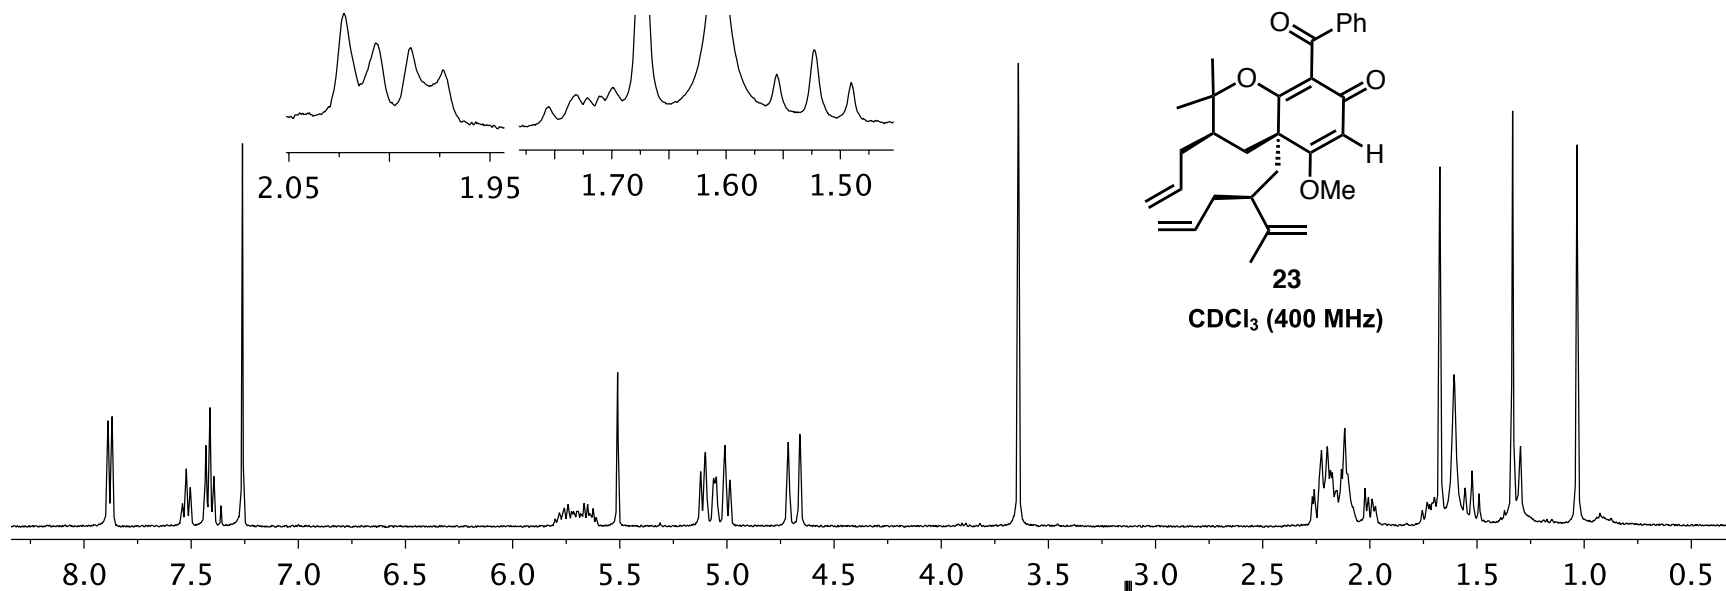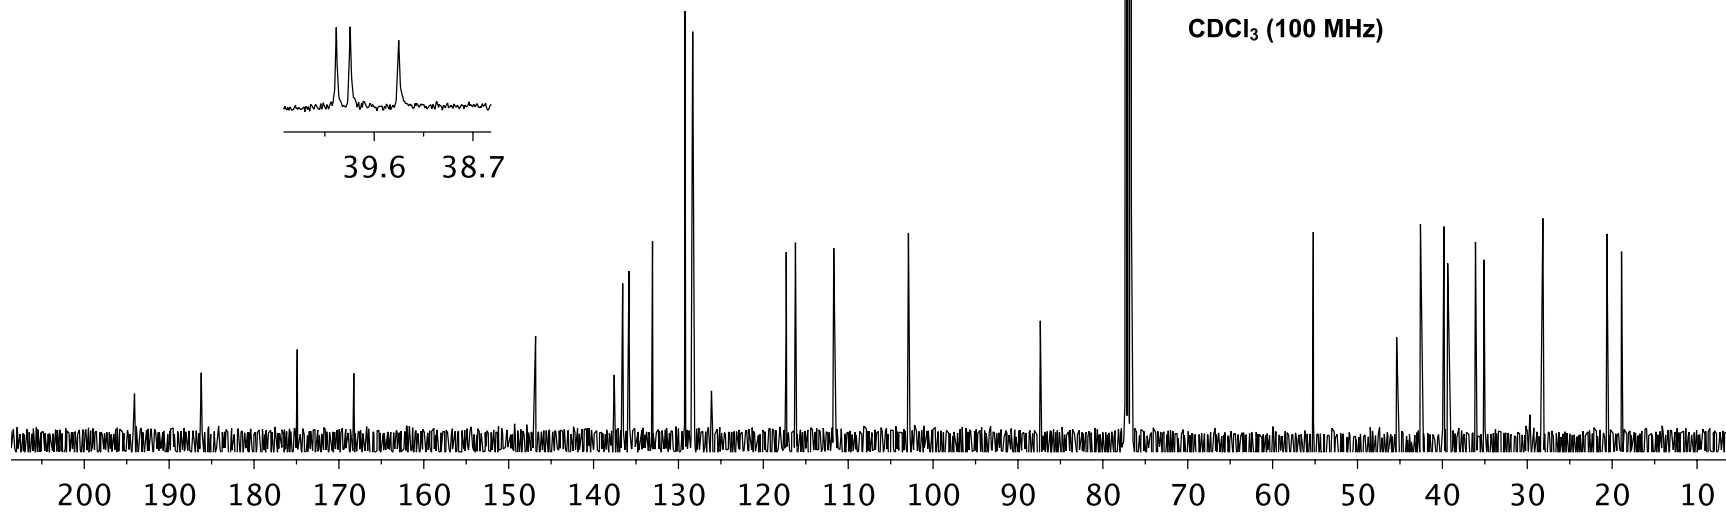

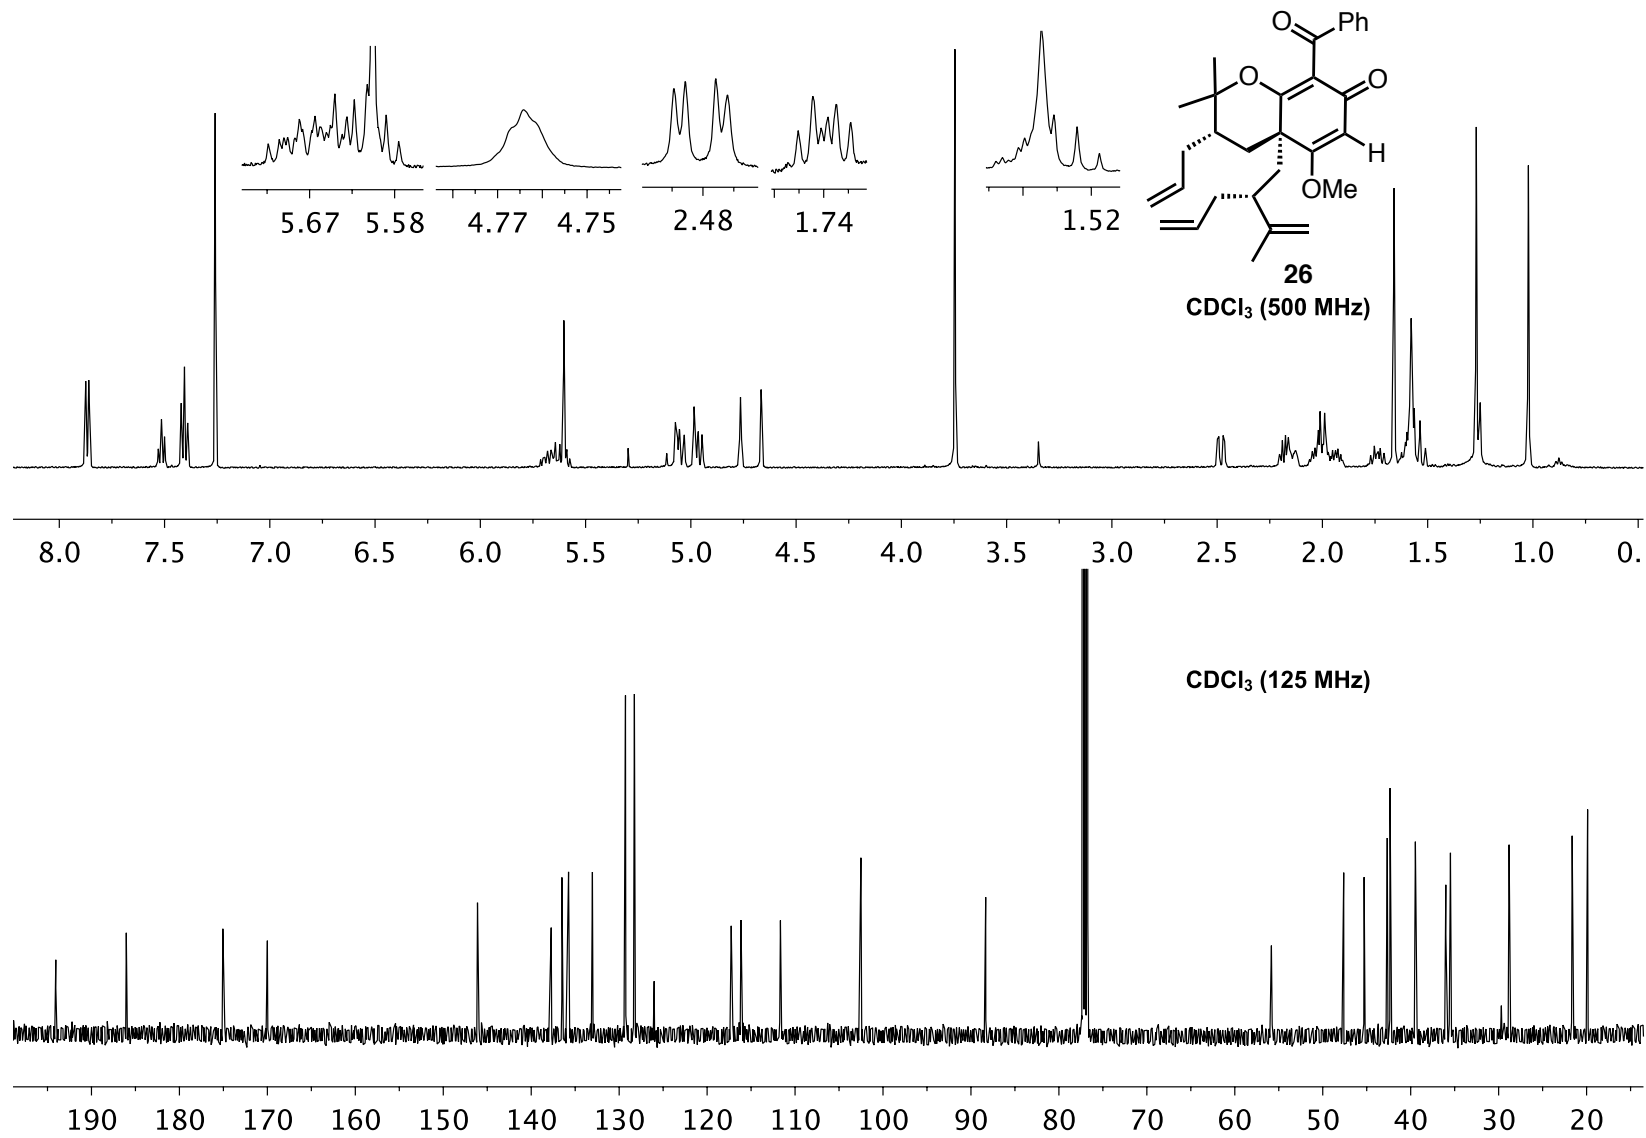

### COSY Correlations for Compound 26

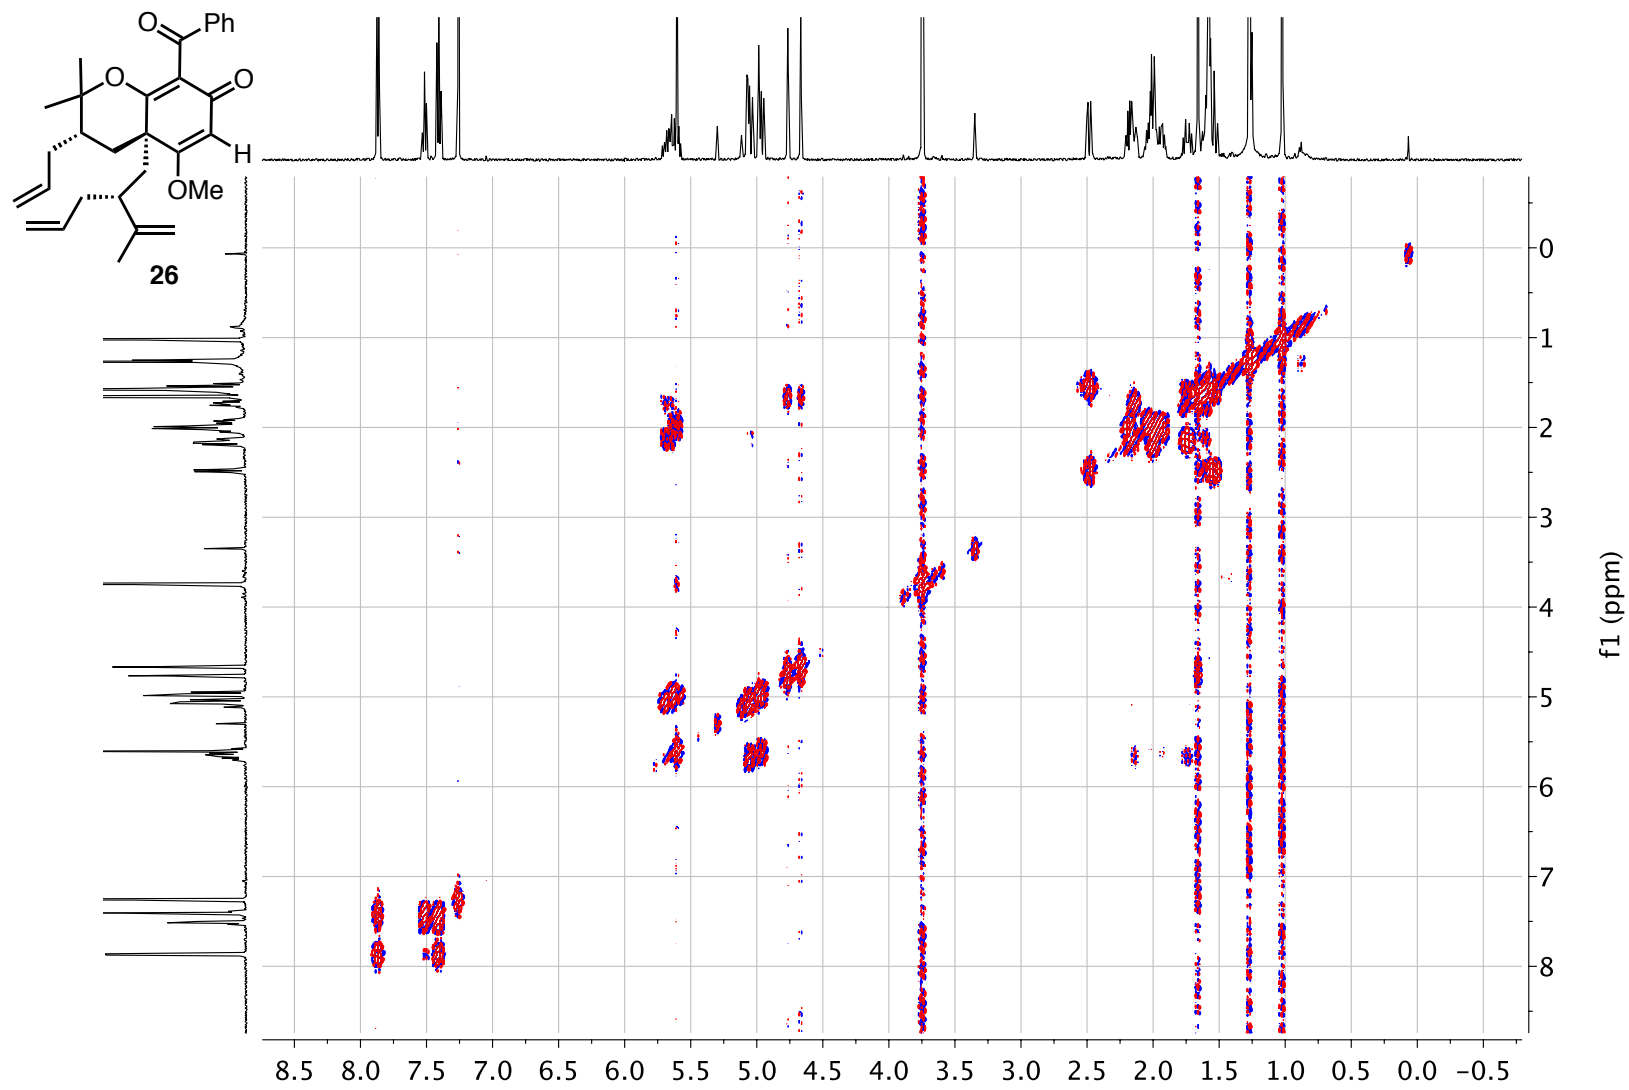



### COSY Correlations (H14-H14', H14-H11, H10-H11, H10-H10')

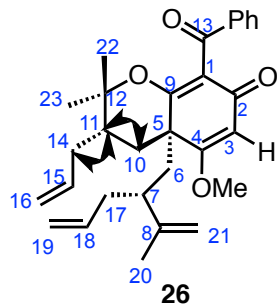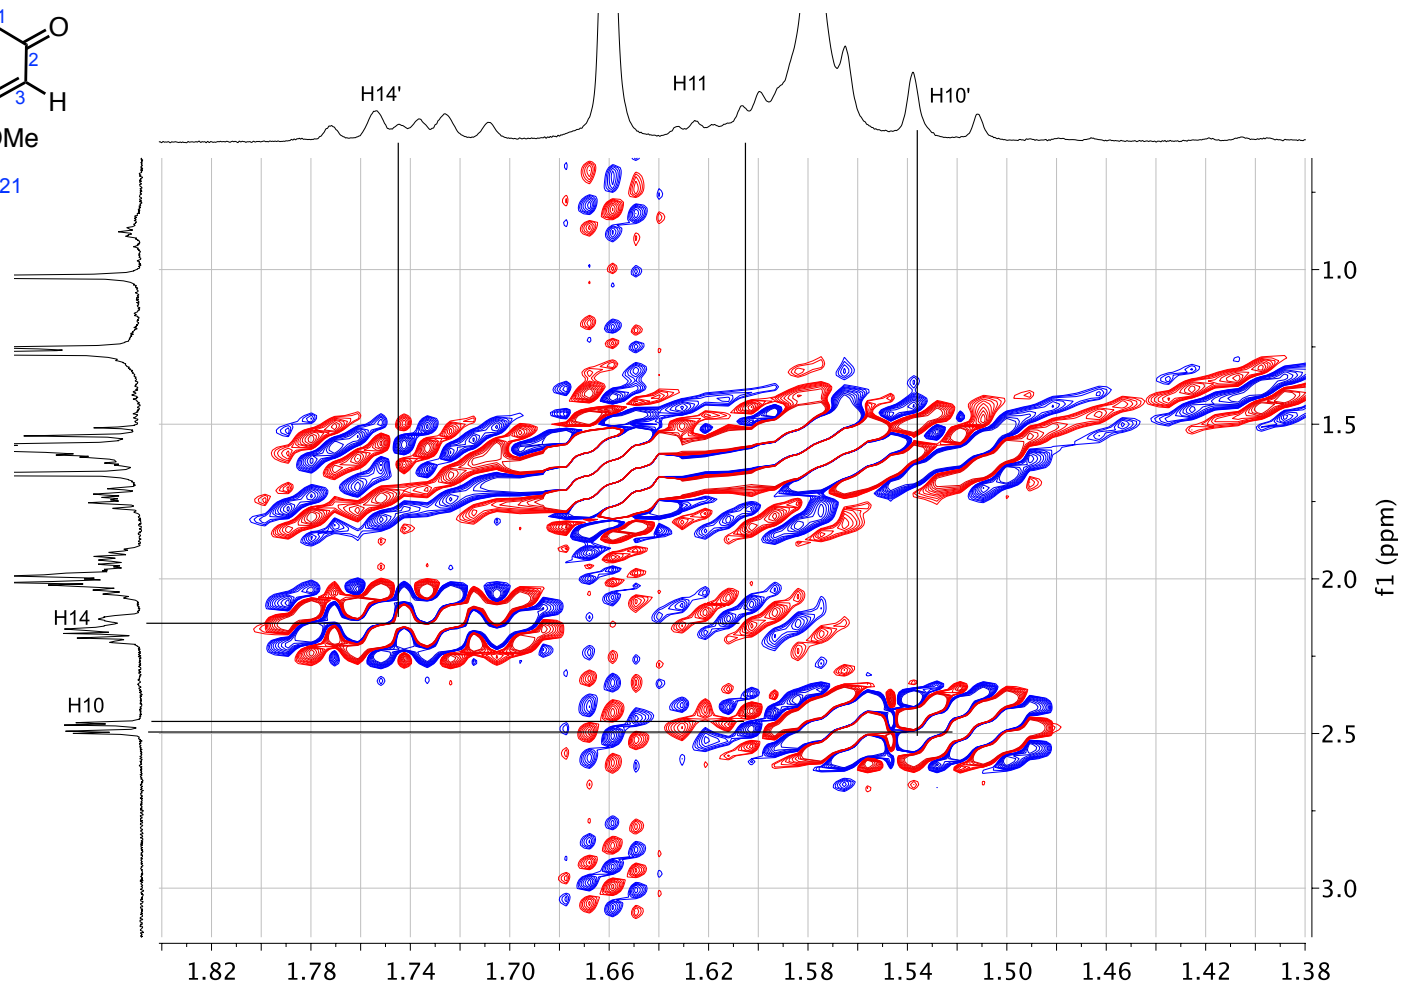

### COSY Correlations (H14'-H15, H17'-H18, H14-H15)

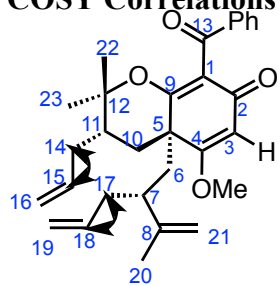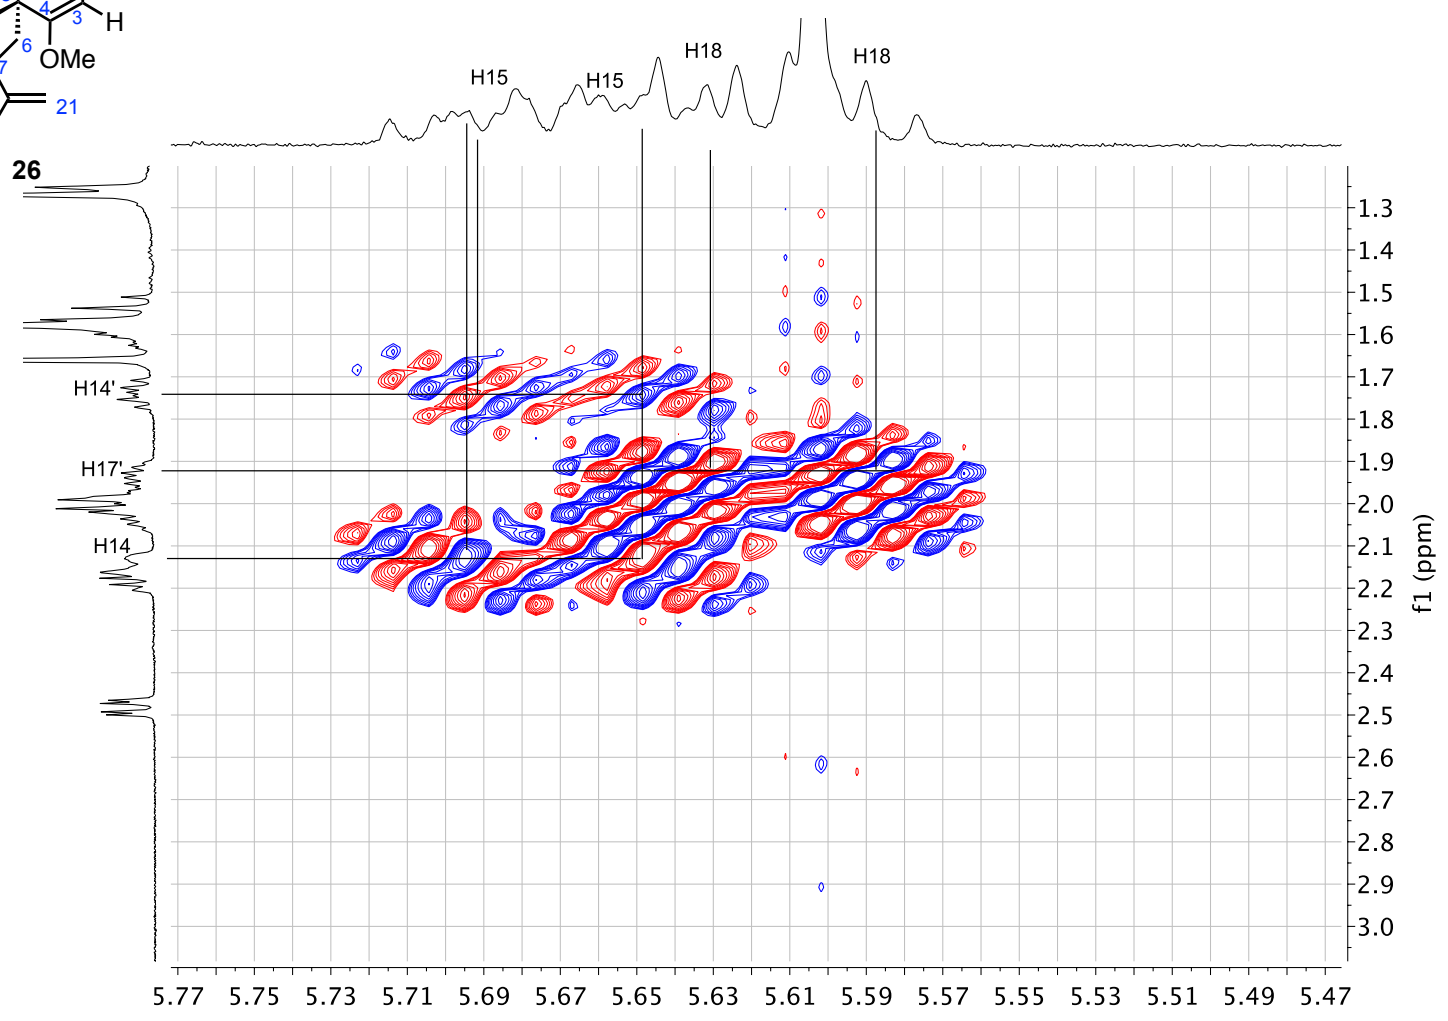

## NOESY Correlations for Compound 26

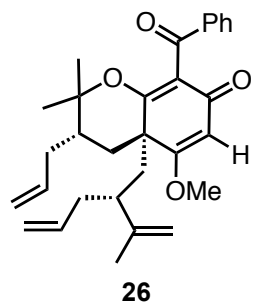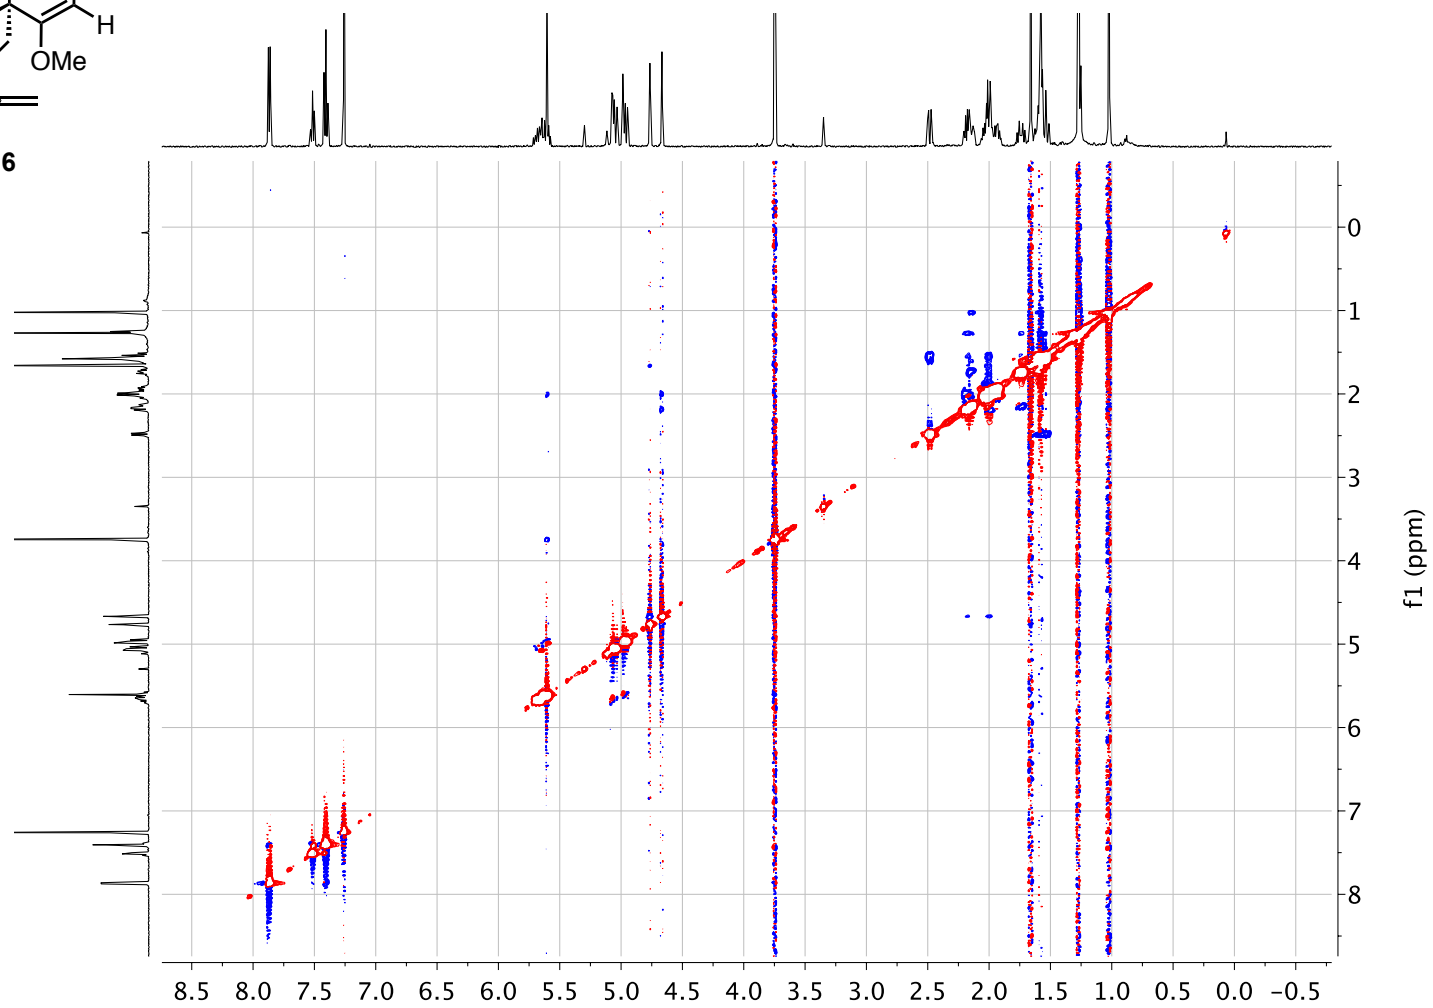

**NOESY Correlations (H22-H14, H22-H11 (orientation of H22), H23-H6 (orientation of H23), H23-H14, H14-H14')**

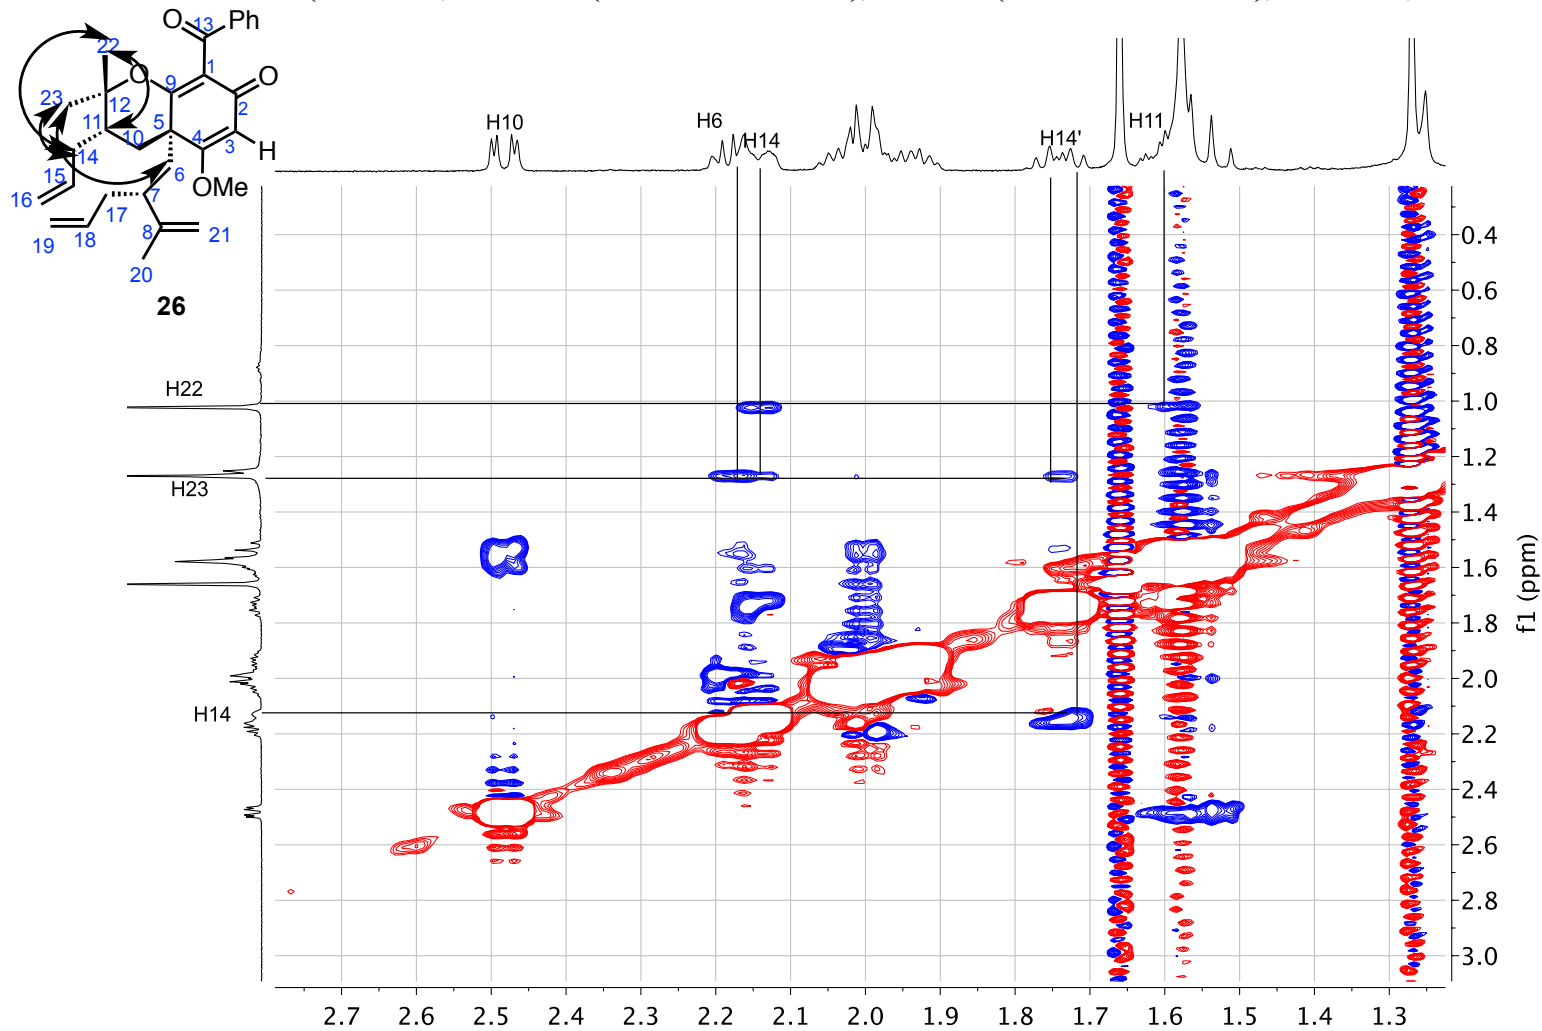

**Diagnostic Information: H11 does not come into proximity with H6.**

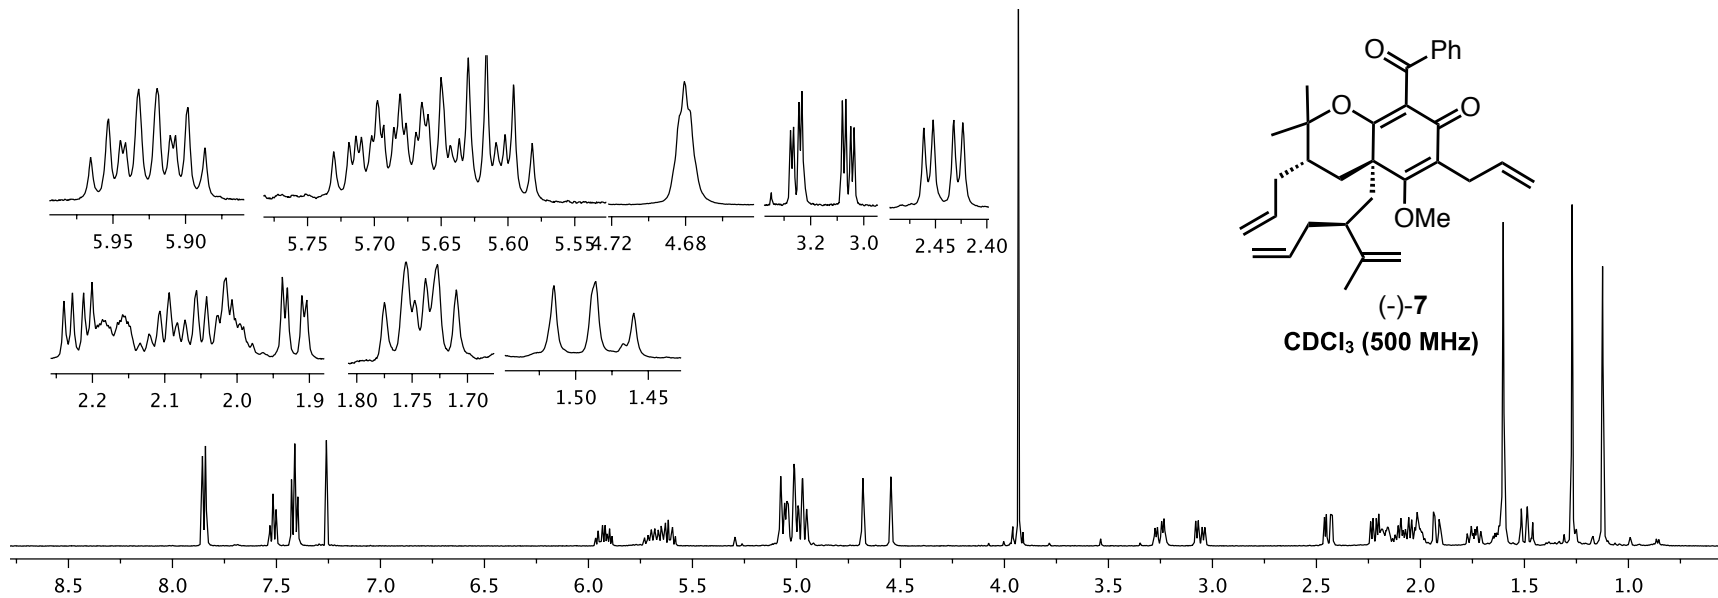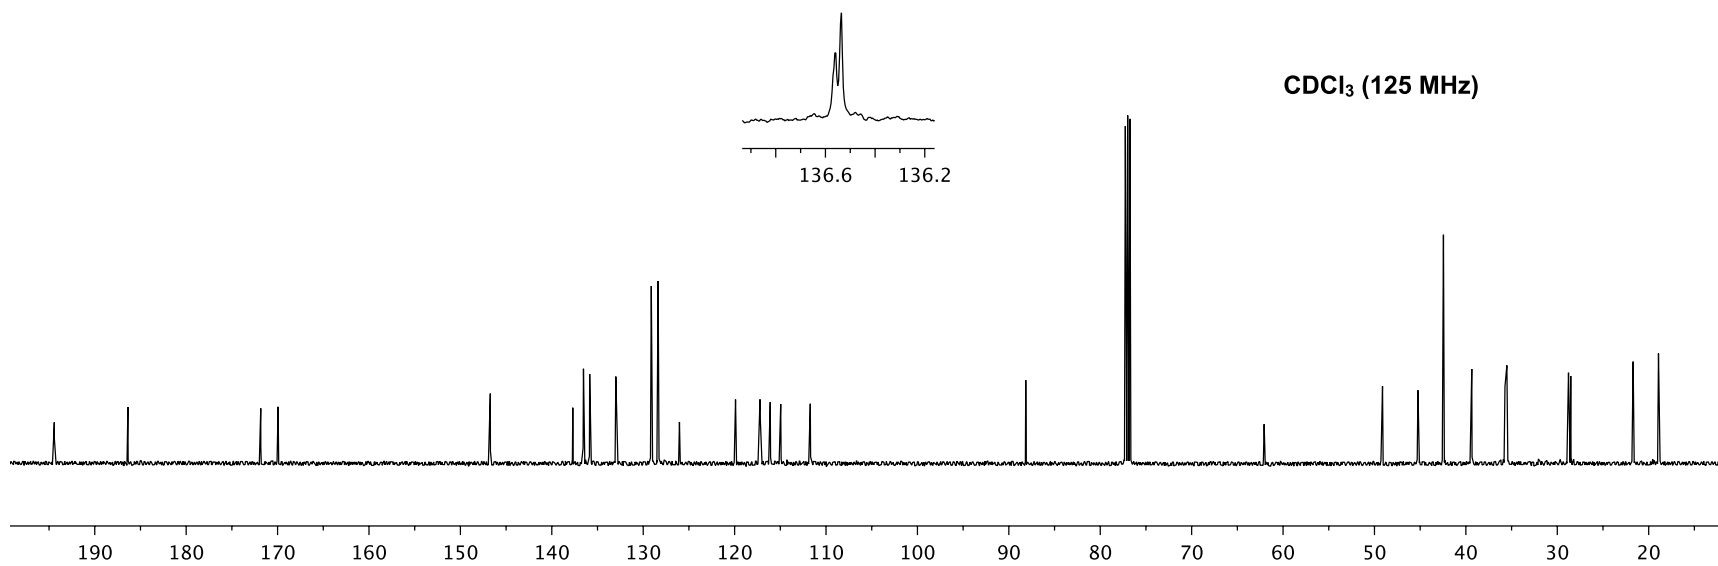

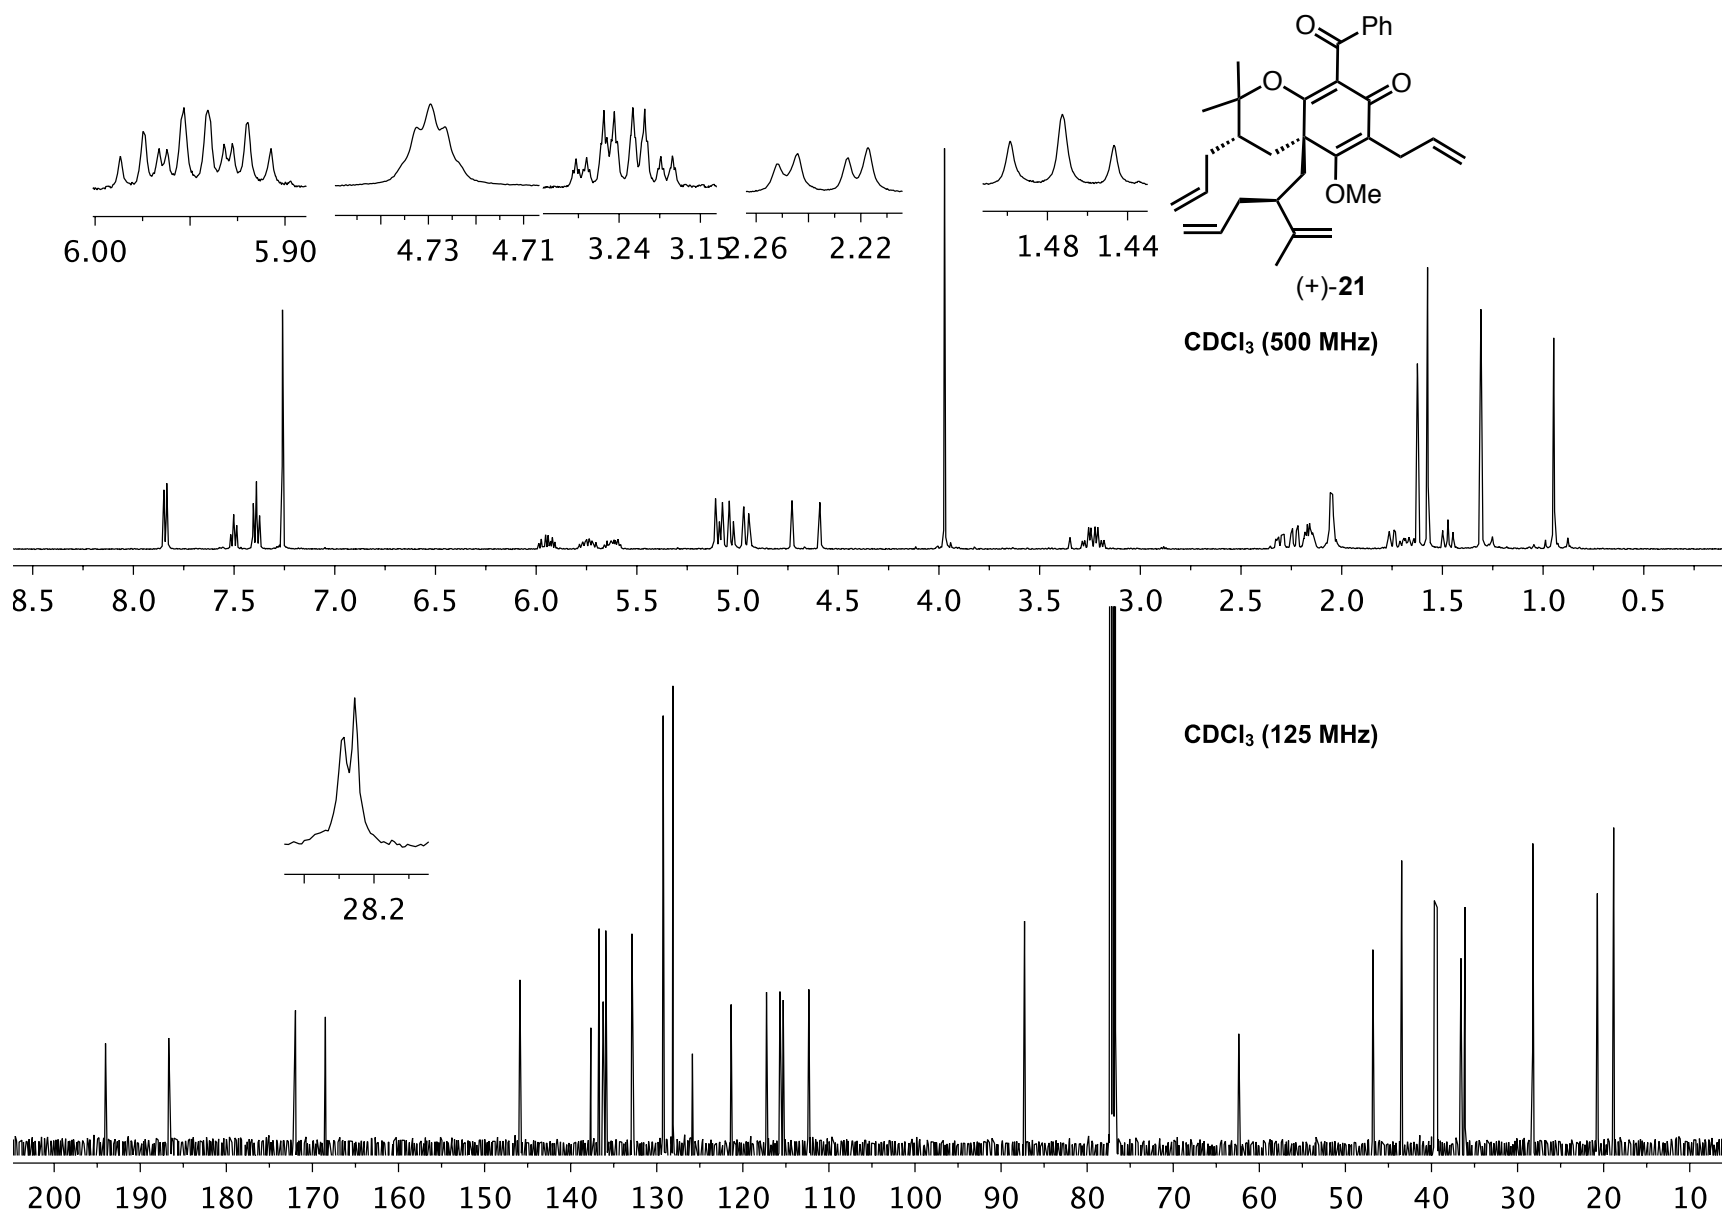

### COSY Correlations for Compound (+)-21

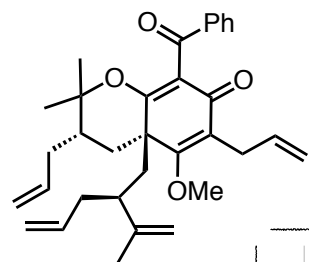

(+)-21

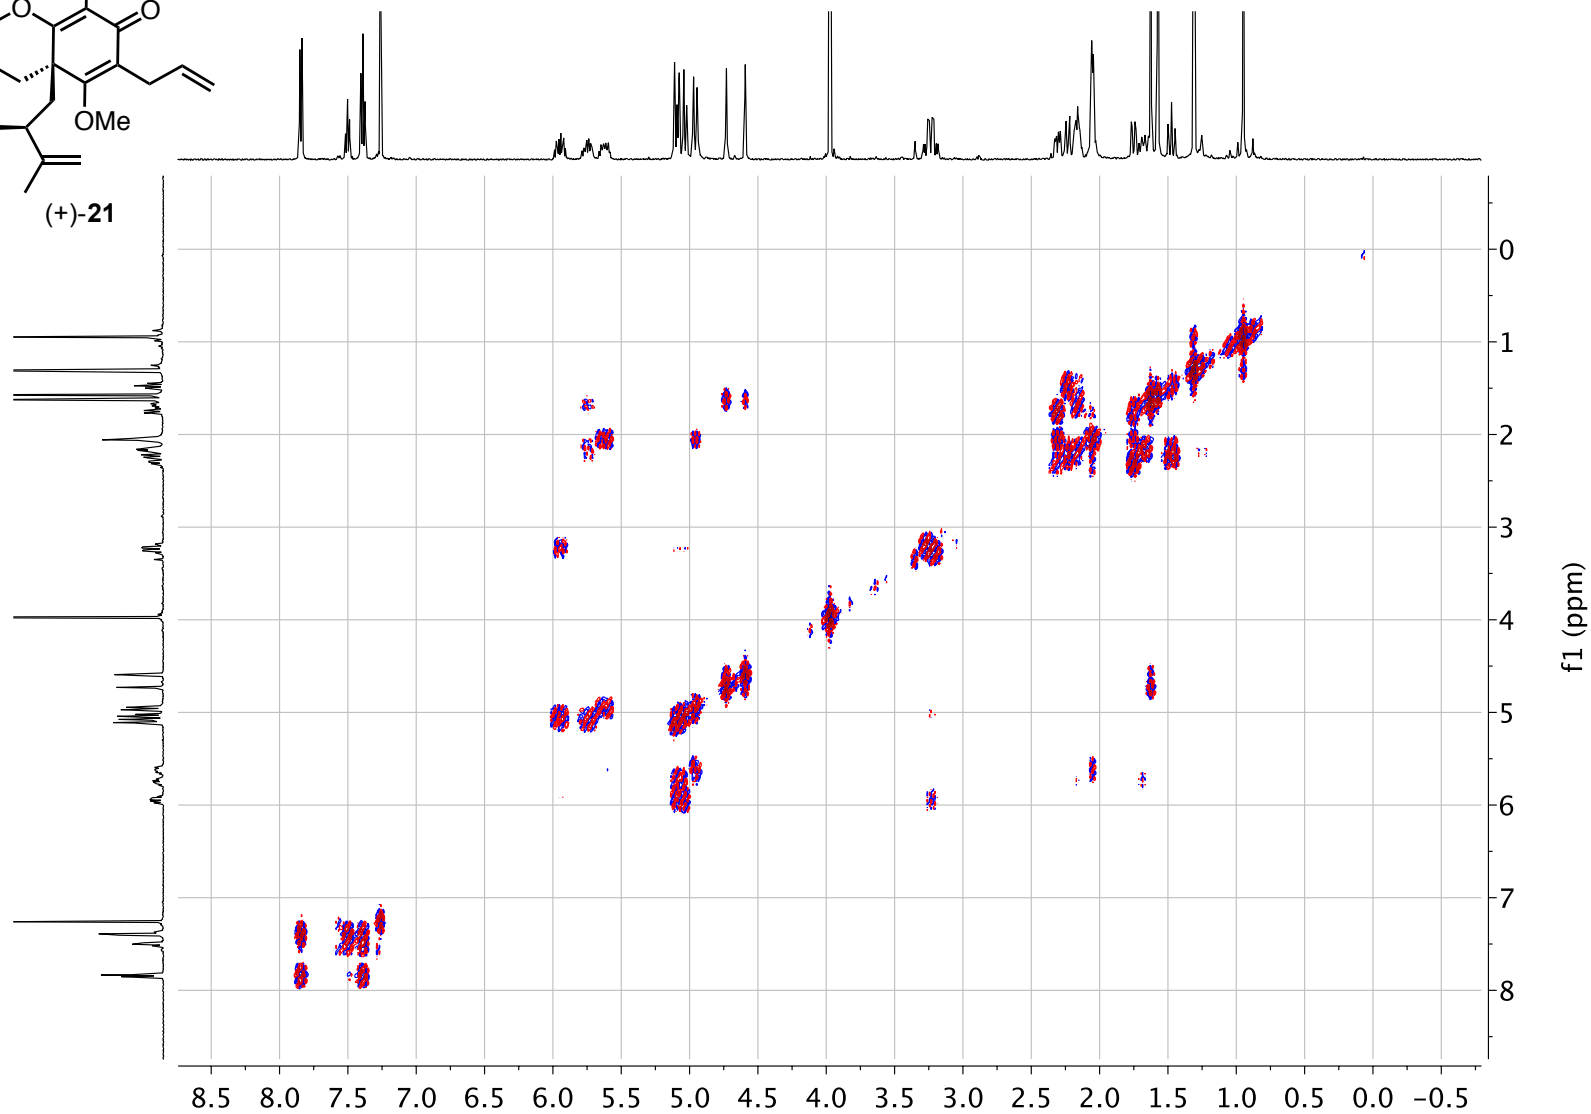

### COSY Correlations (H14'-H15, H17-H18, H14-H15, H28/28'-H29)

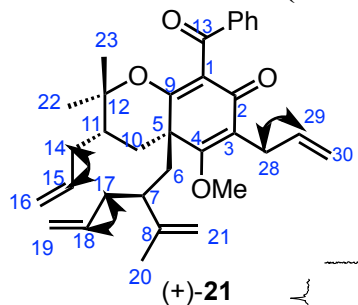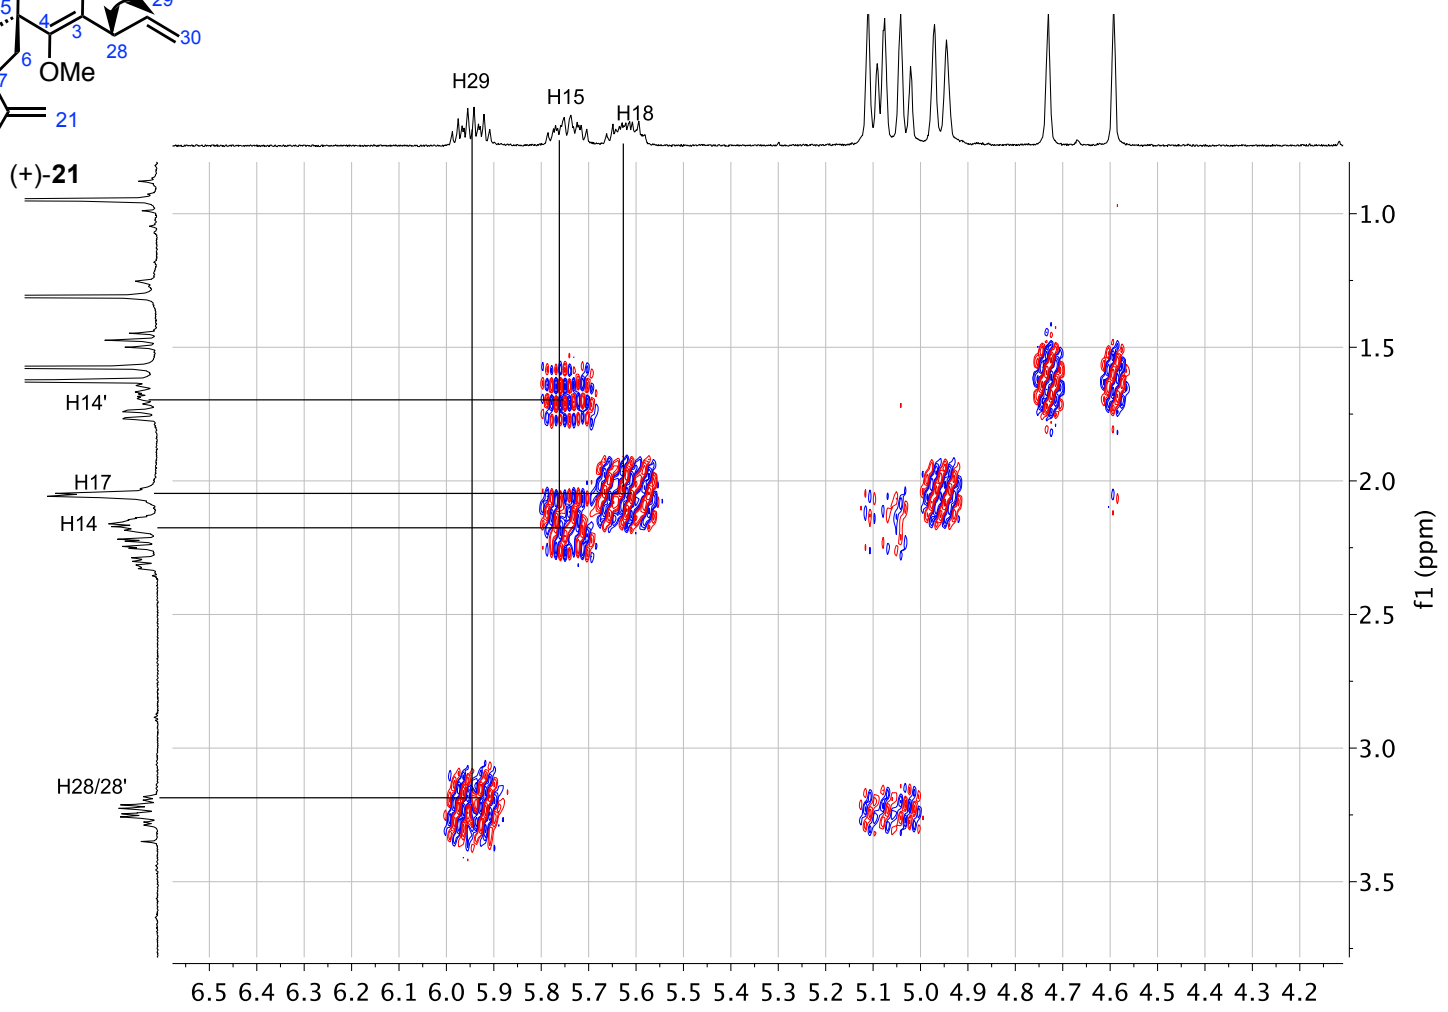



### COSY Correlations (H7-H6, H7-H6', H11-H10)

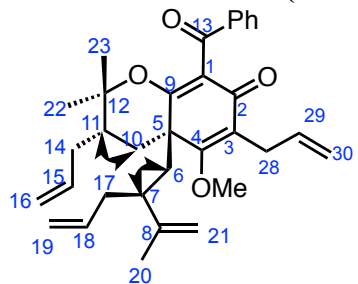

(+)-21

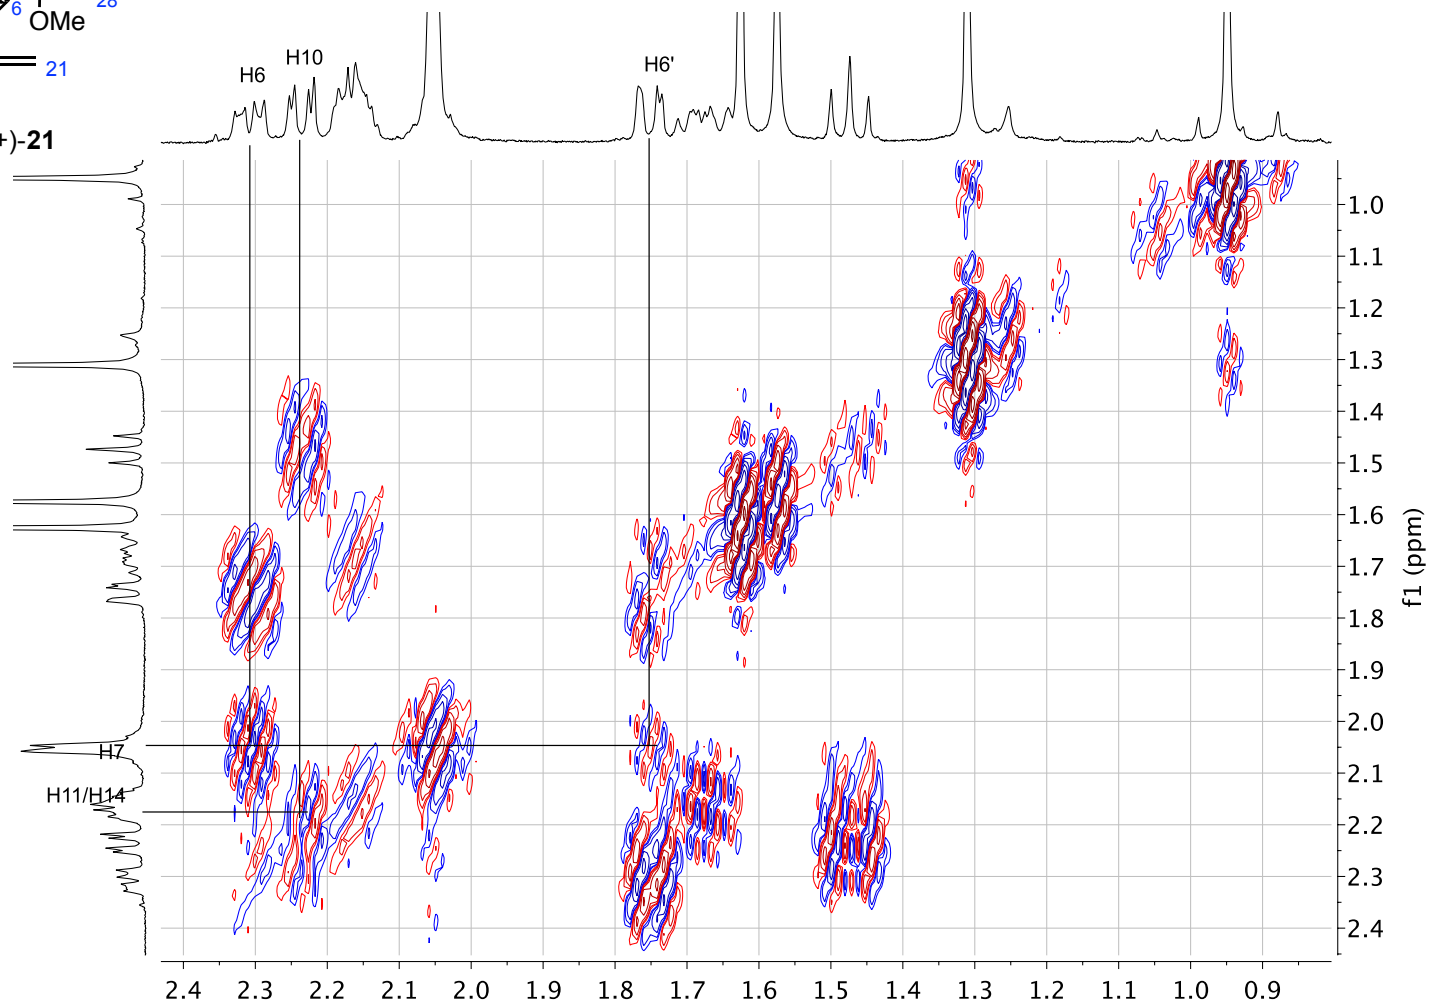

# NOESY Correlations for Compound (+)-21

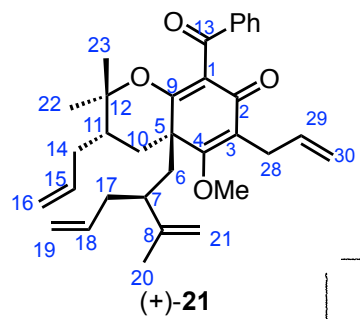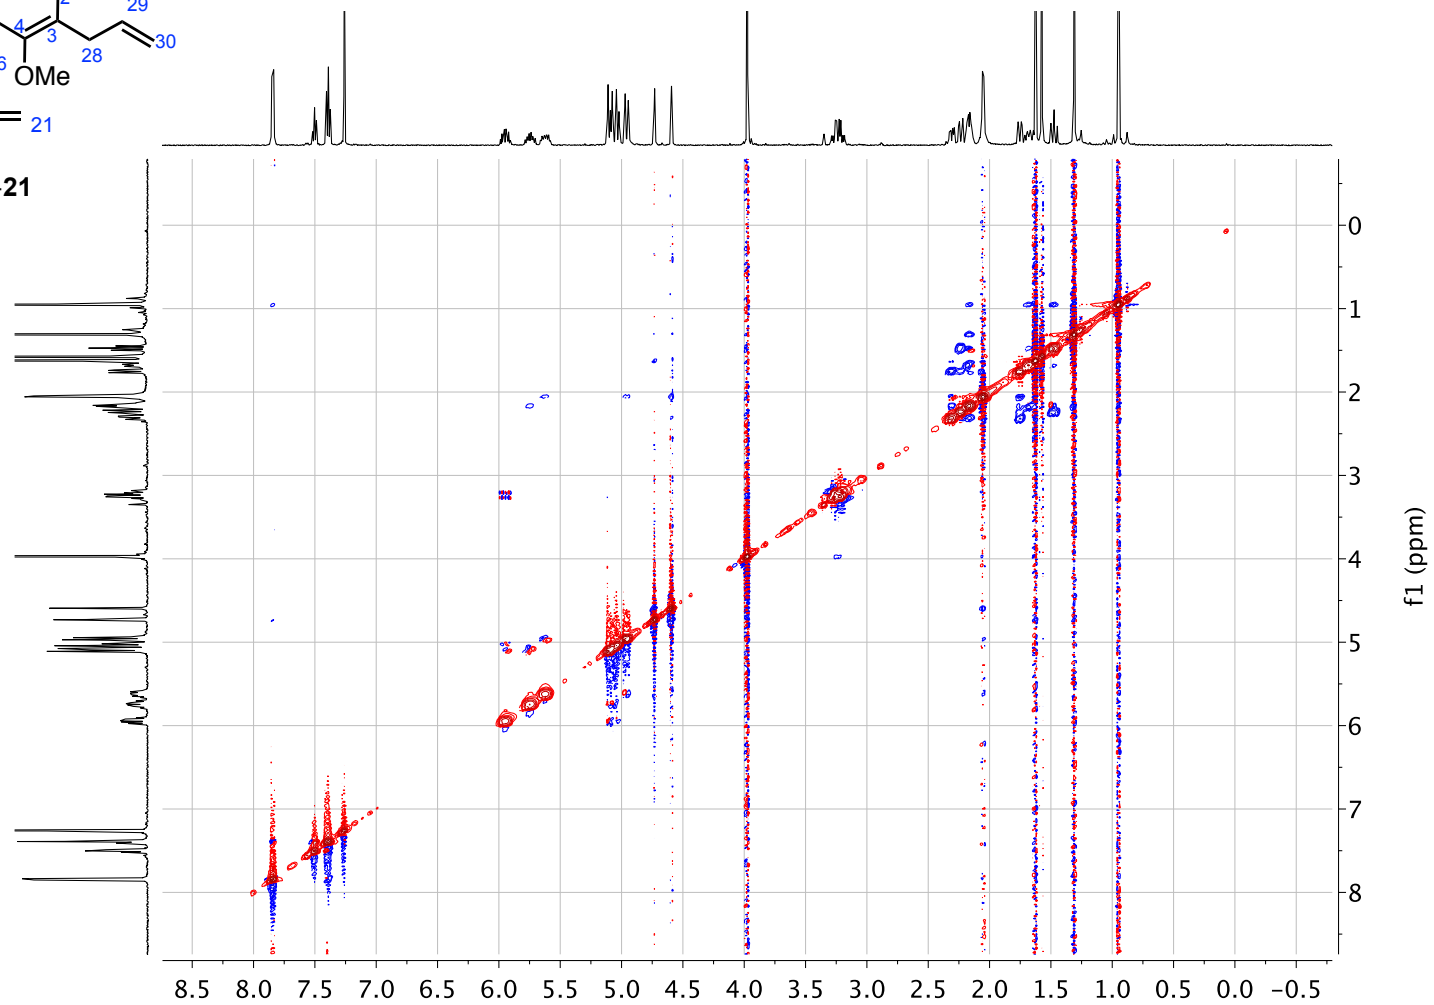

**NOESY Correlations (H22-H10', H10'-H14', H6'-H10)**

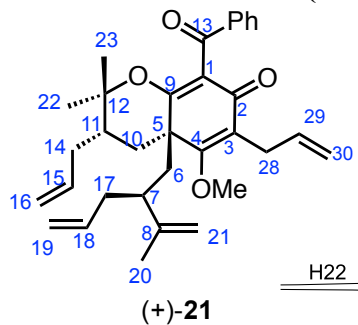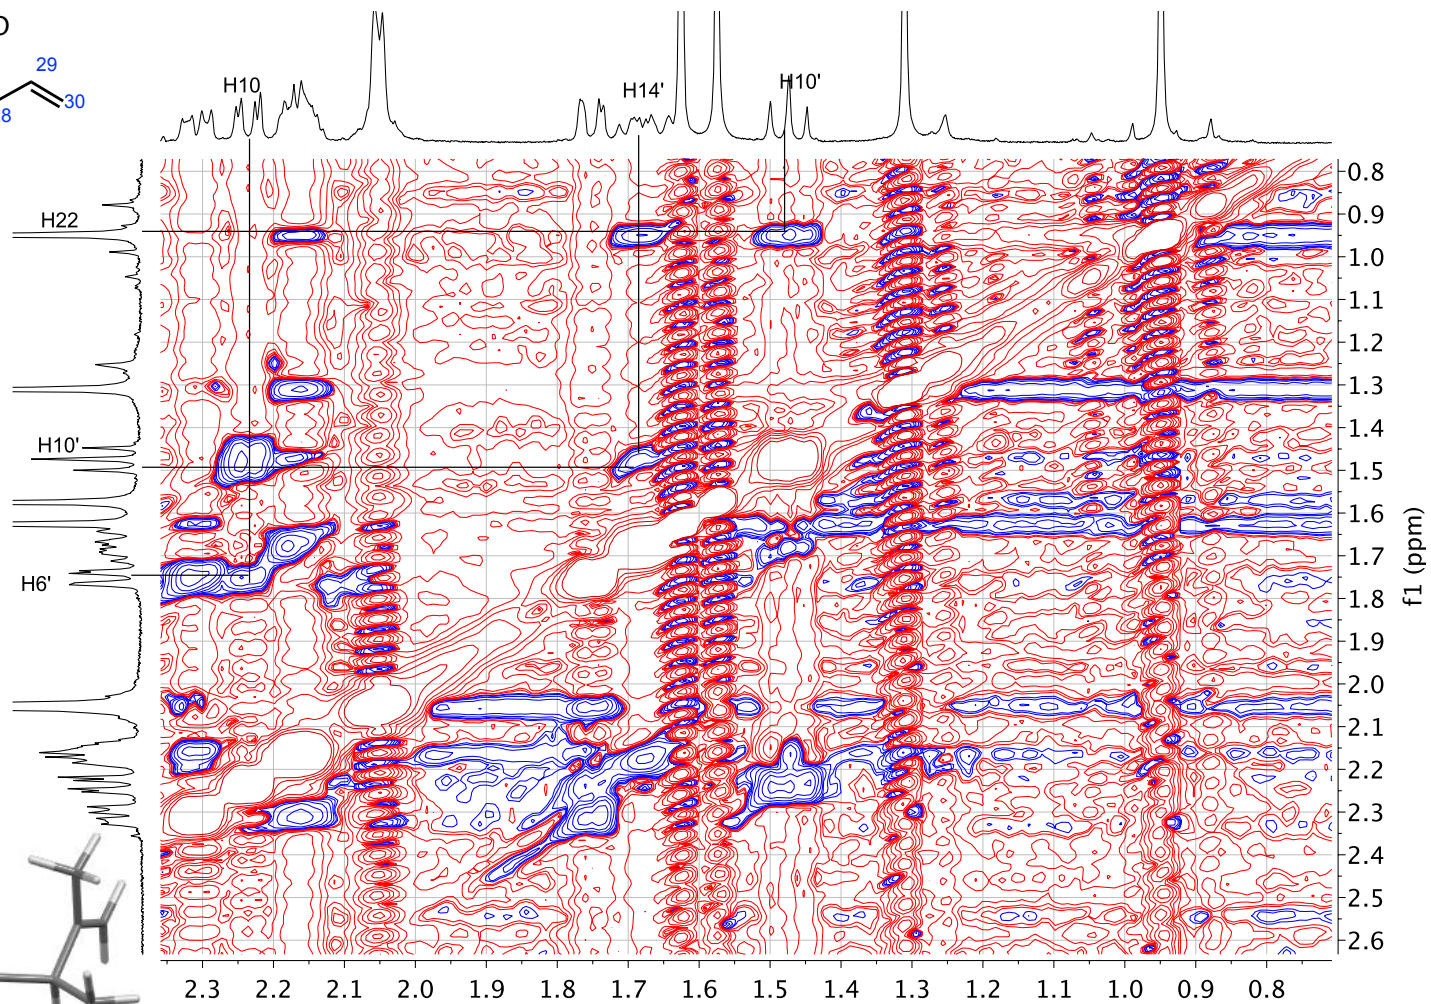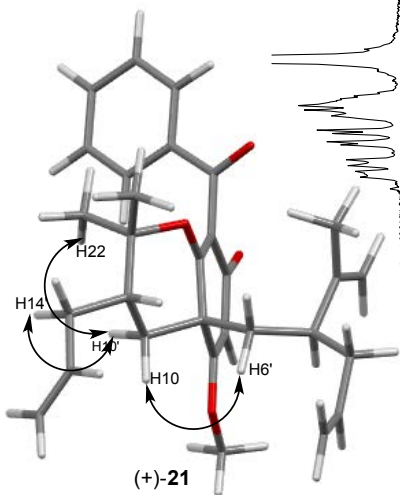

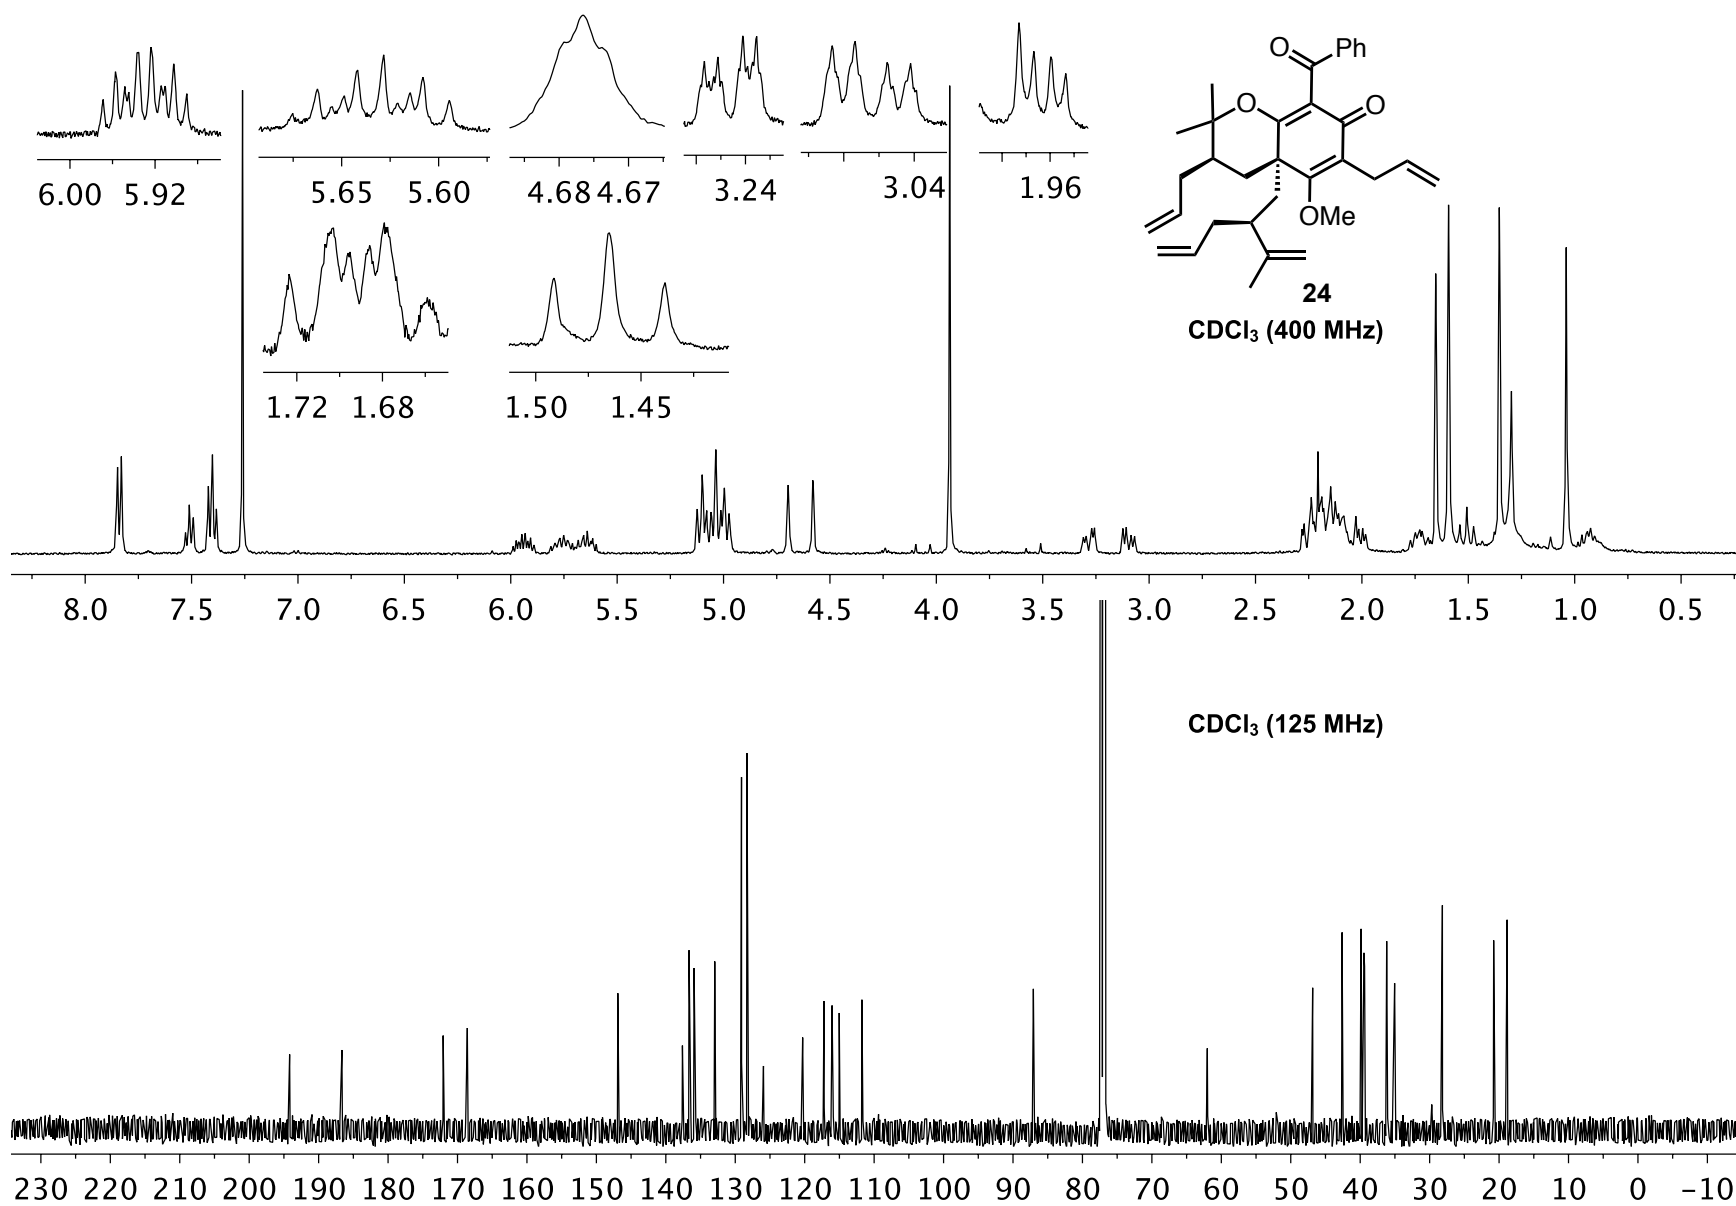

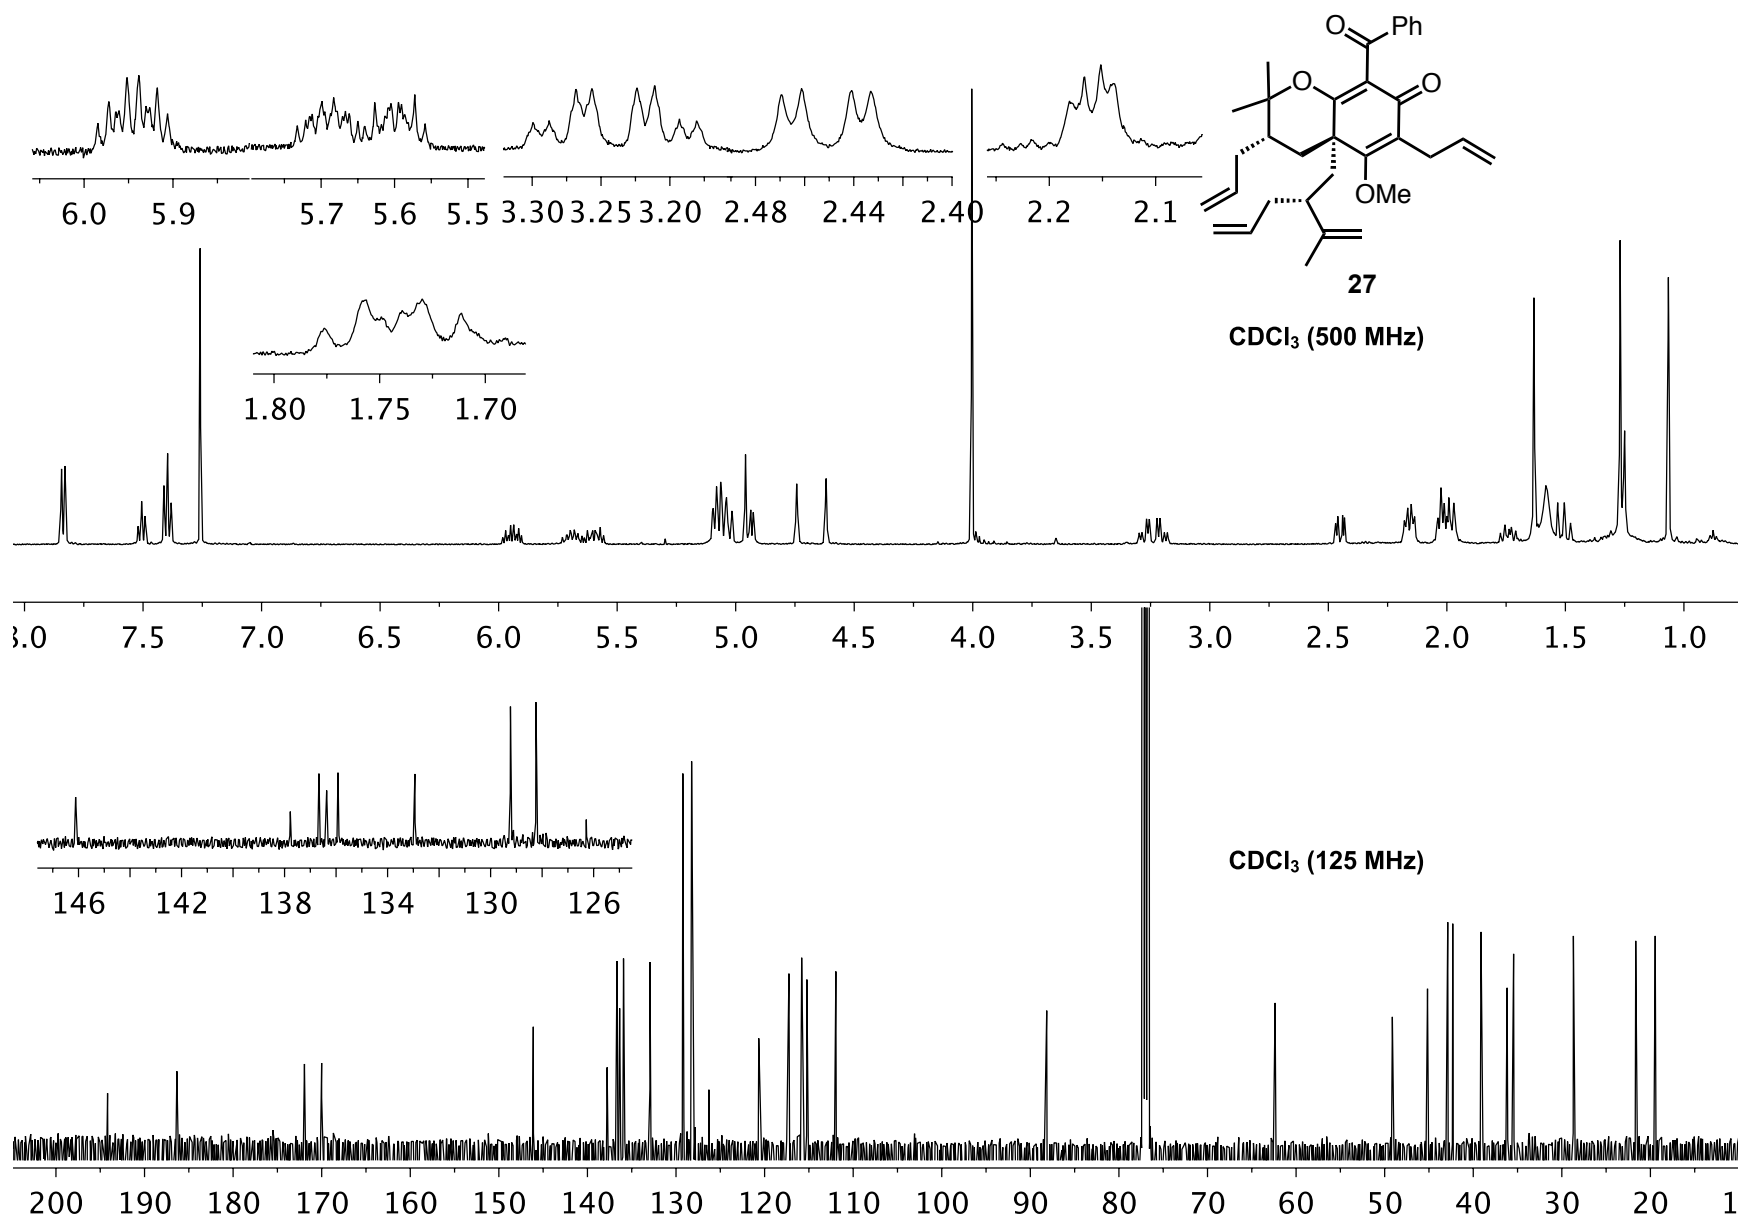

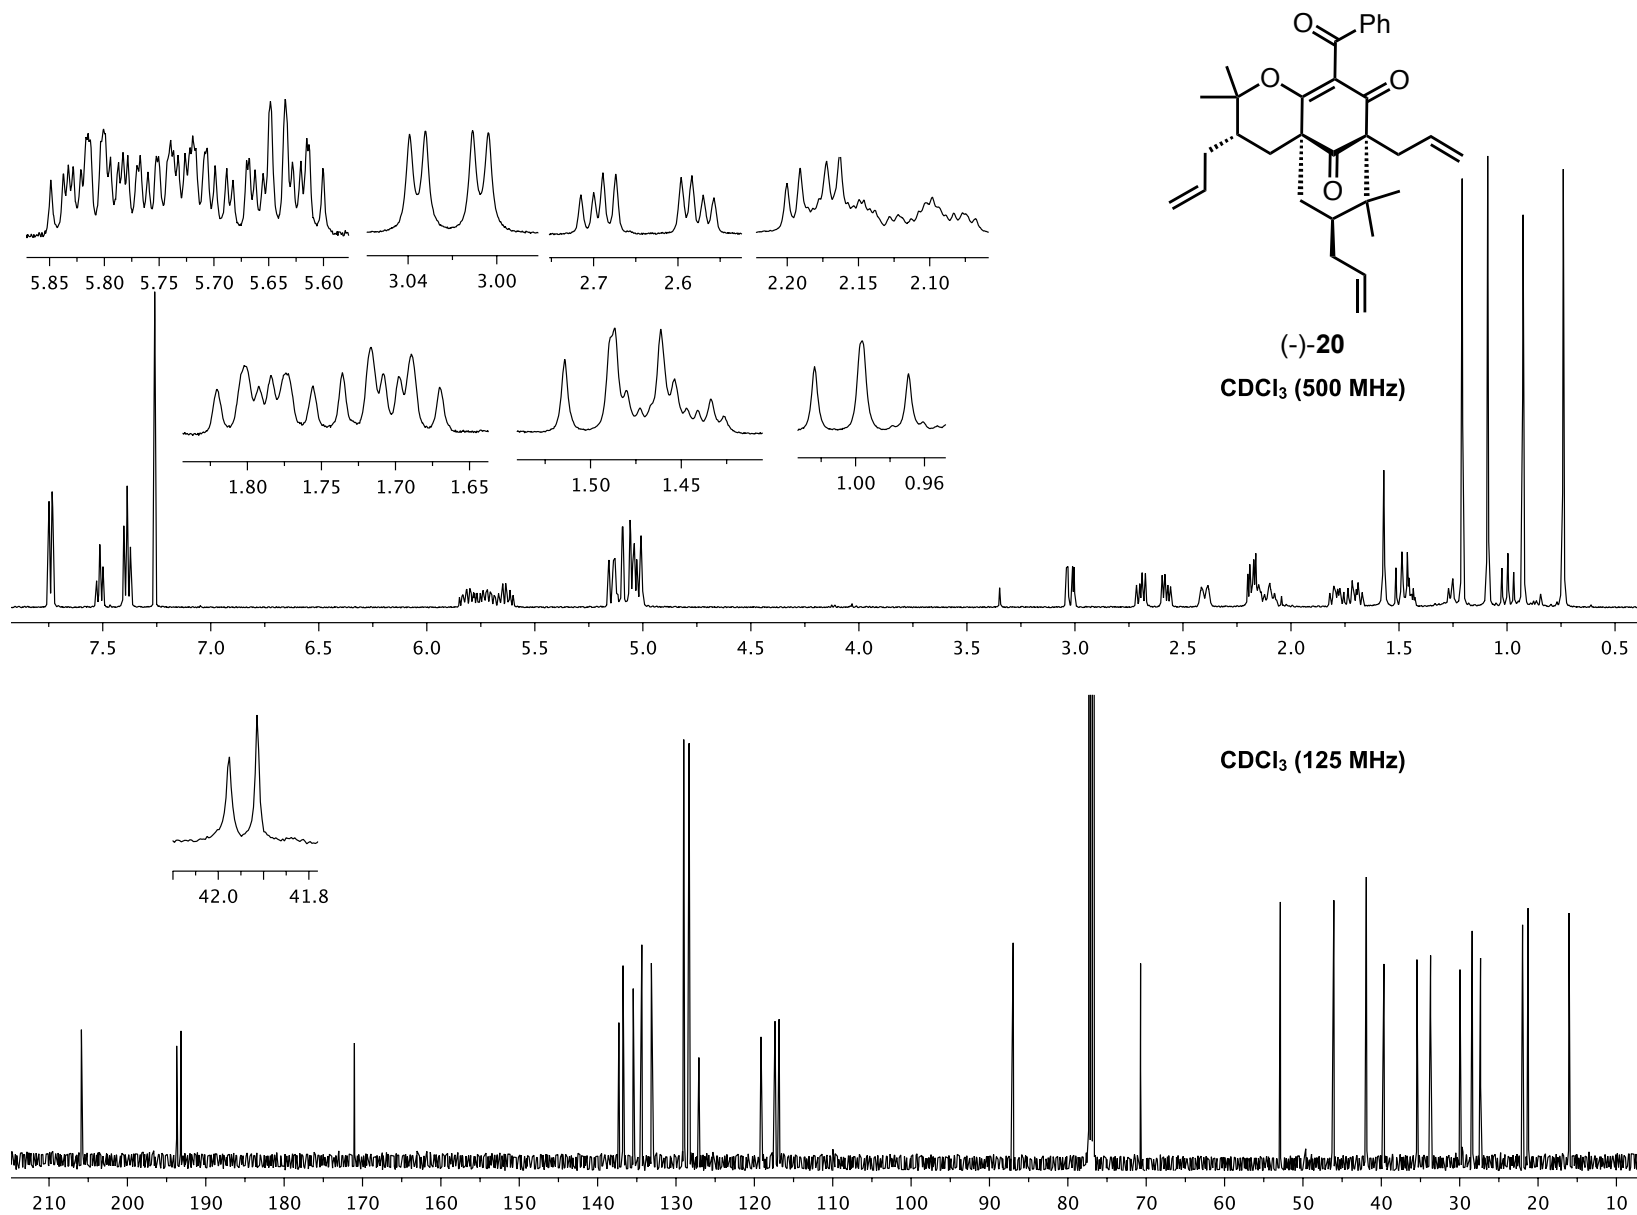

# COSY Correlations for Compound (-)-20

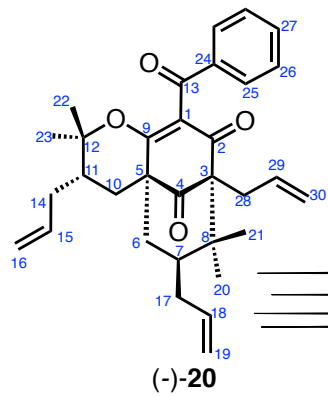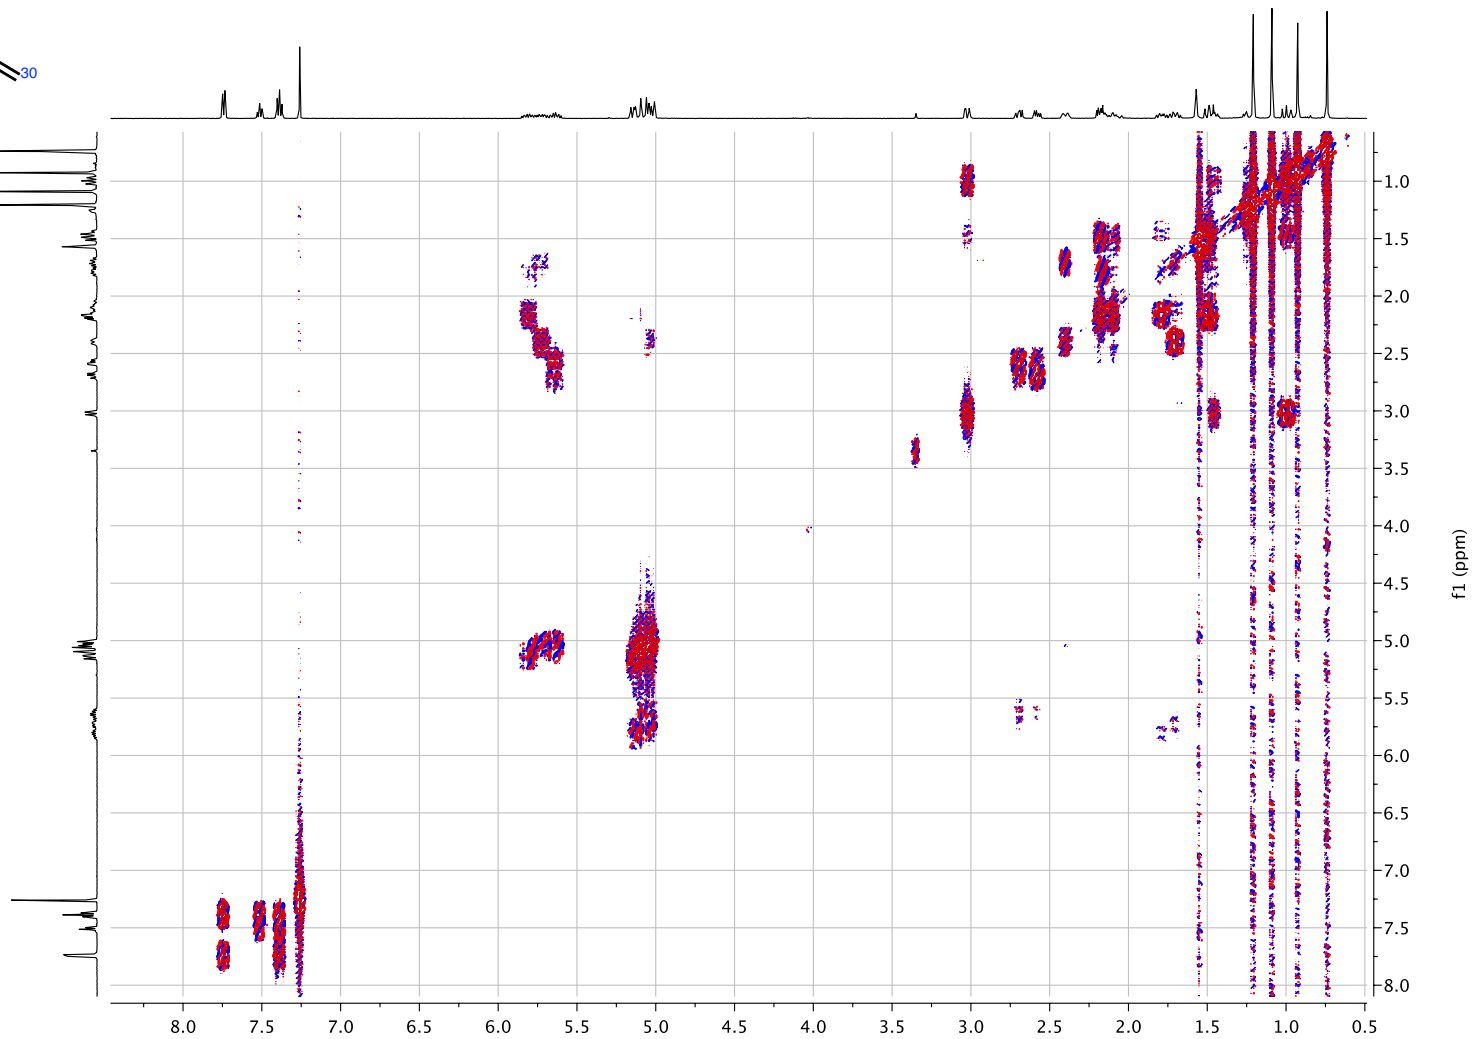

**COSY Correlations (H17'-H18, H14'-H15, H14-H15, H17-H18, H28'-H29, H28-H29)**

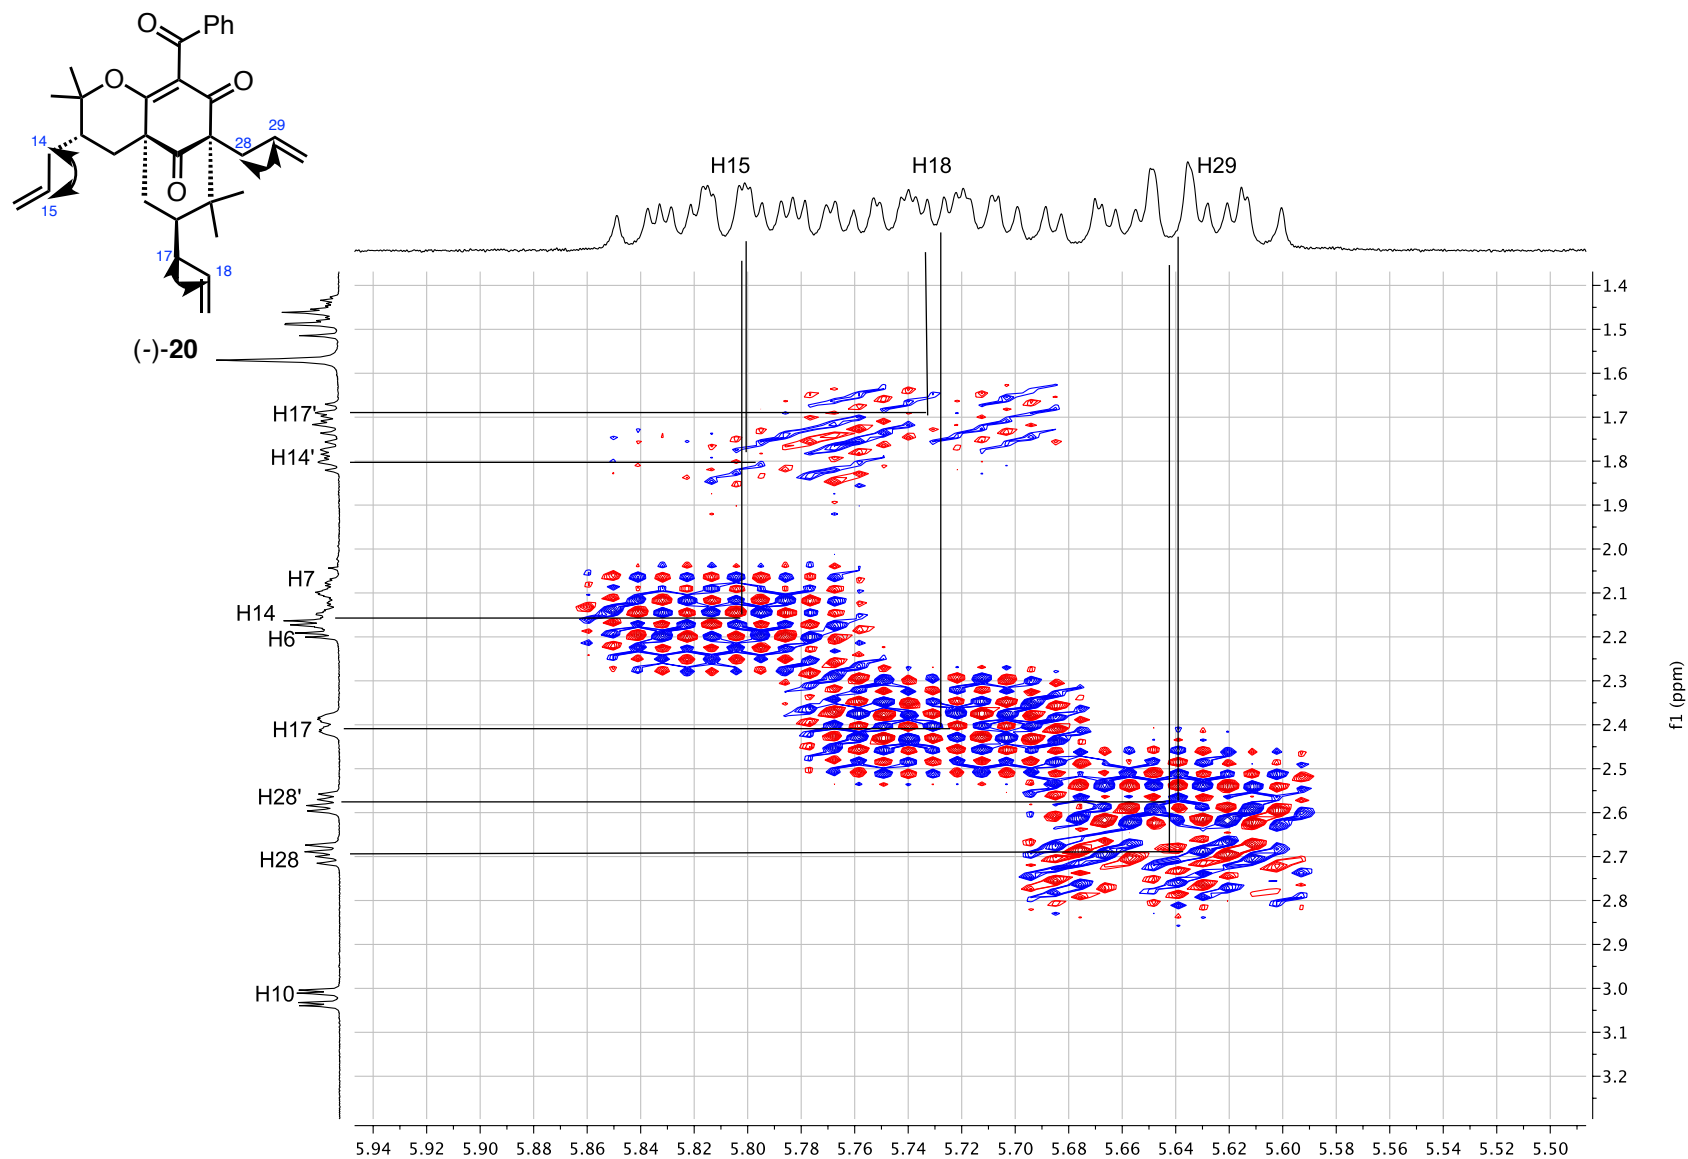



**COSY Correlations (H11-H14', H6'-H7, H7-H6, H7-H17', H10-H11)**

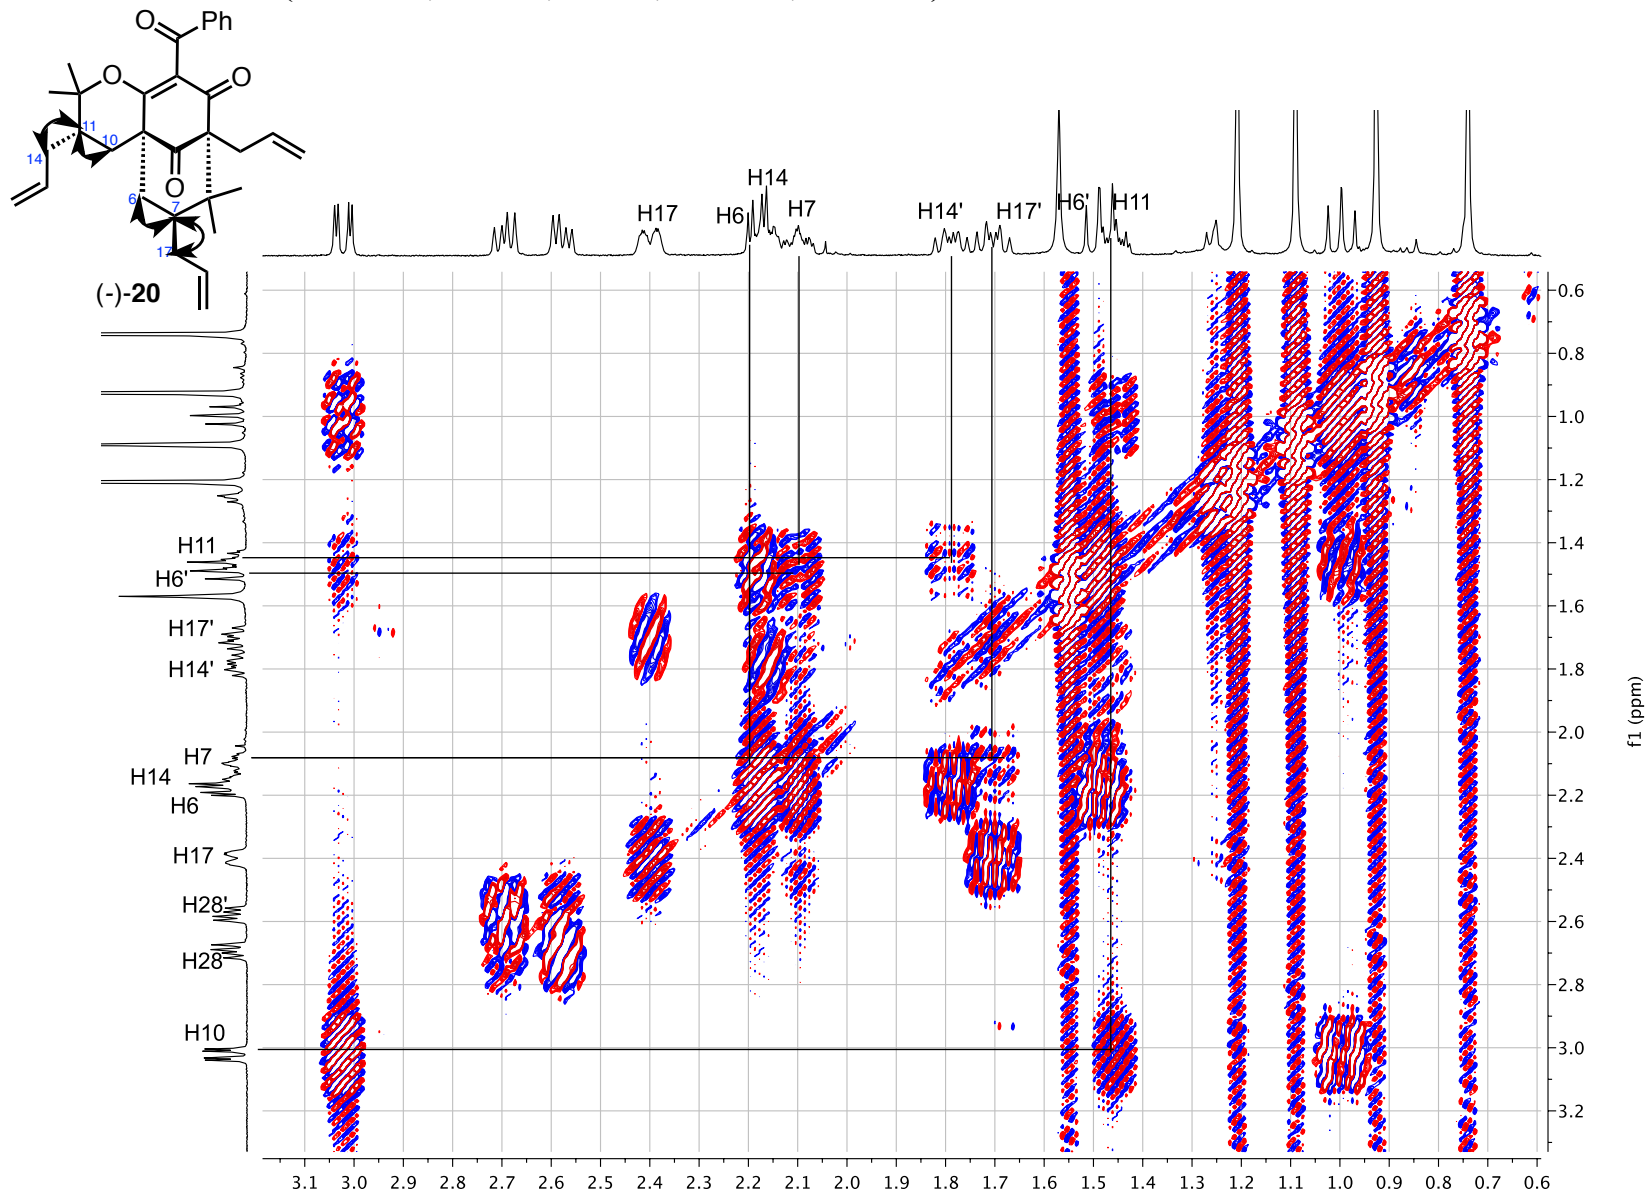

# HMBC Correlations for Compound (-)-20

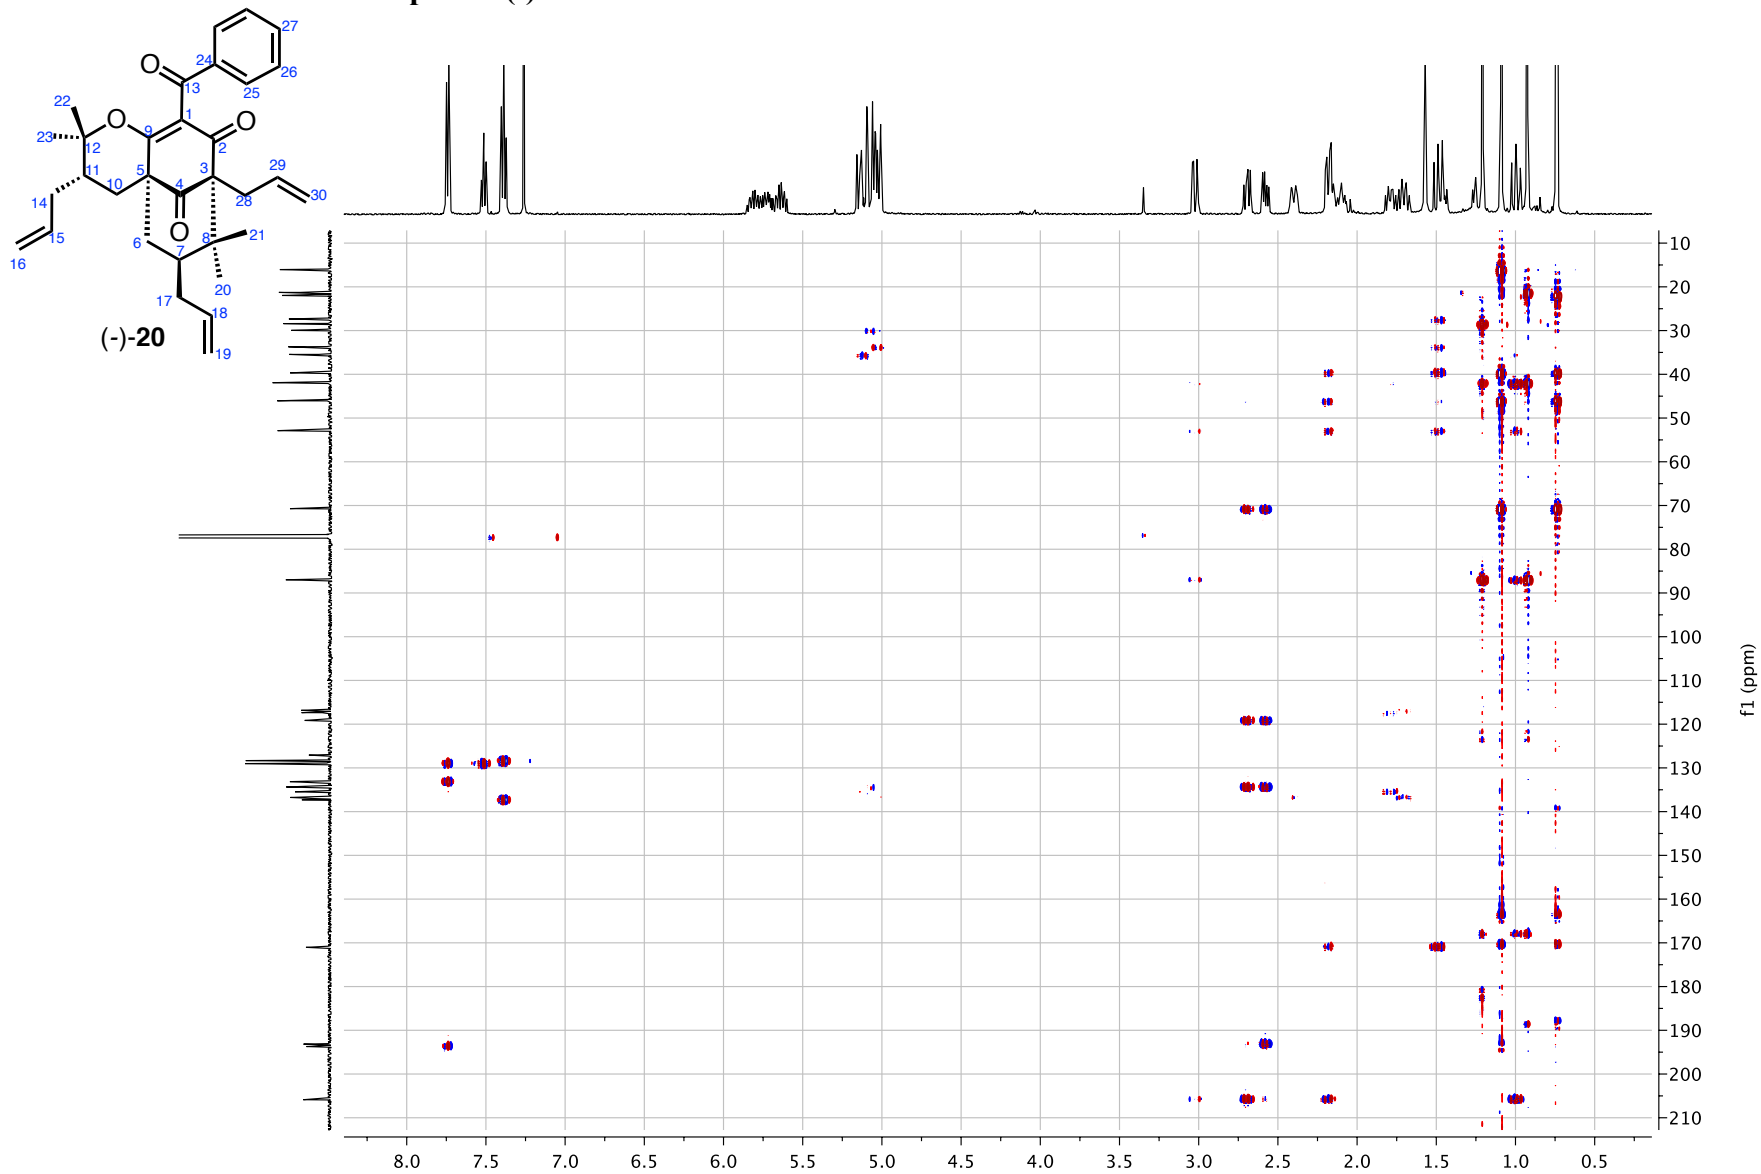

### HMBC Correlations (C3-H28, C3-H28', C12-H10)

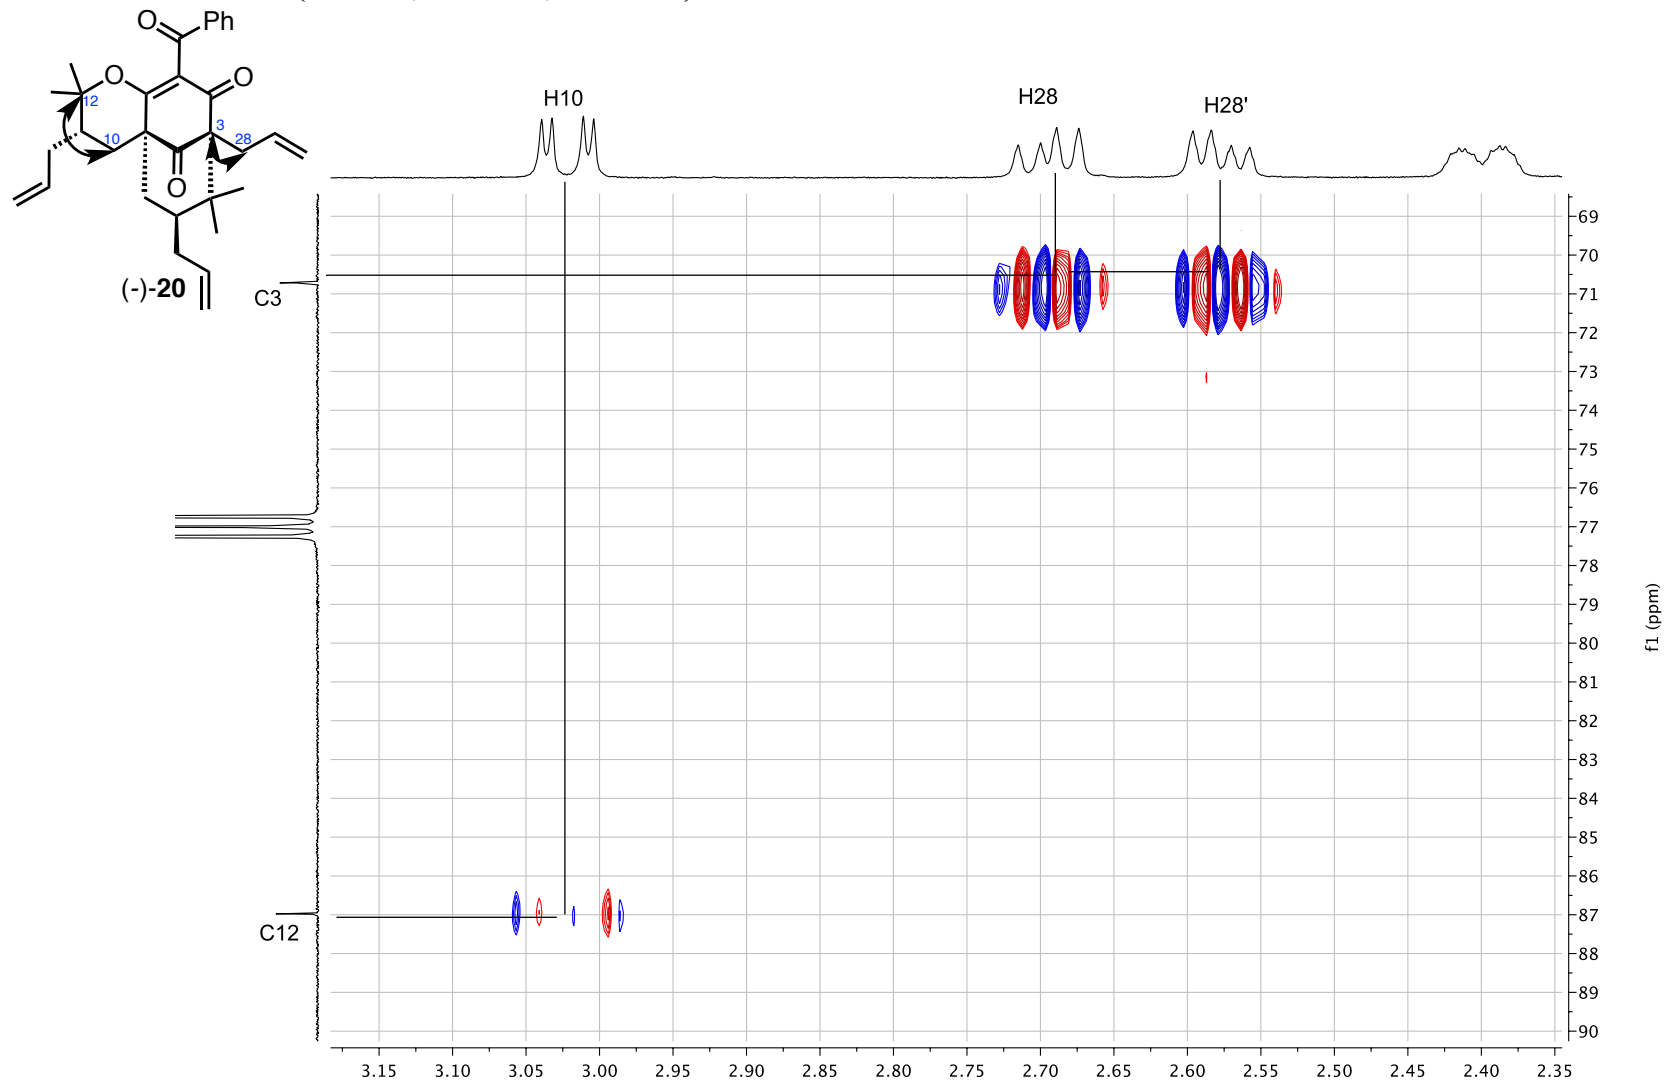

# NOESY Correlations for Compound (-)-20

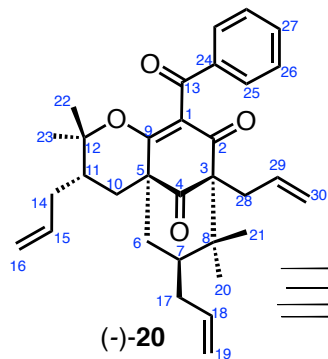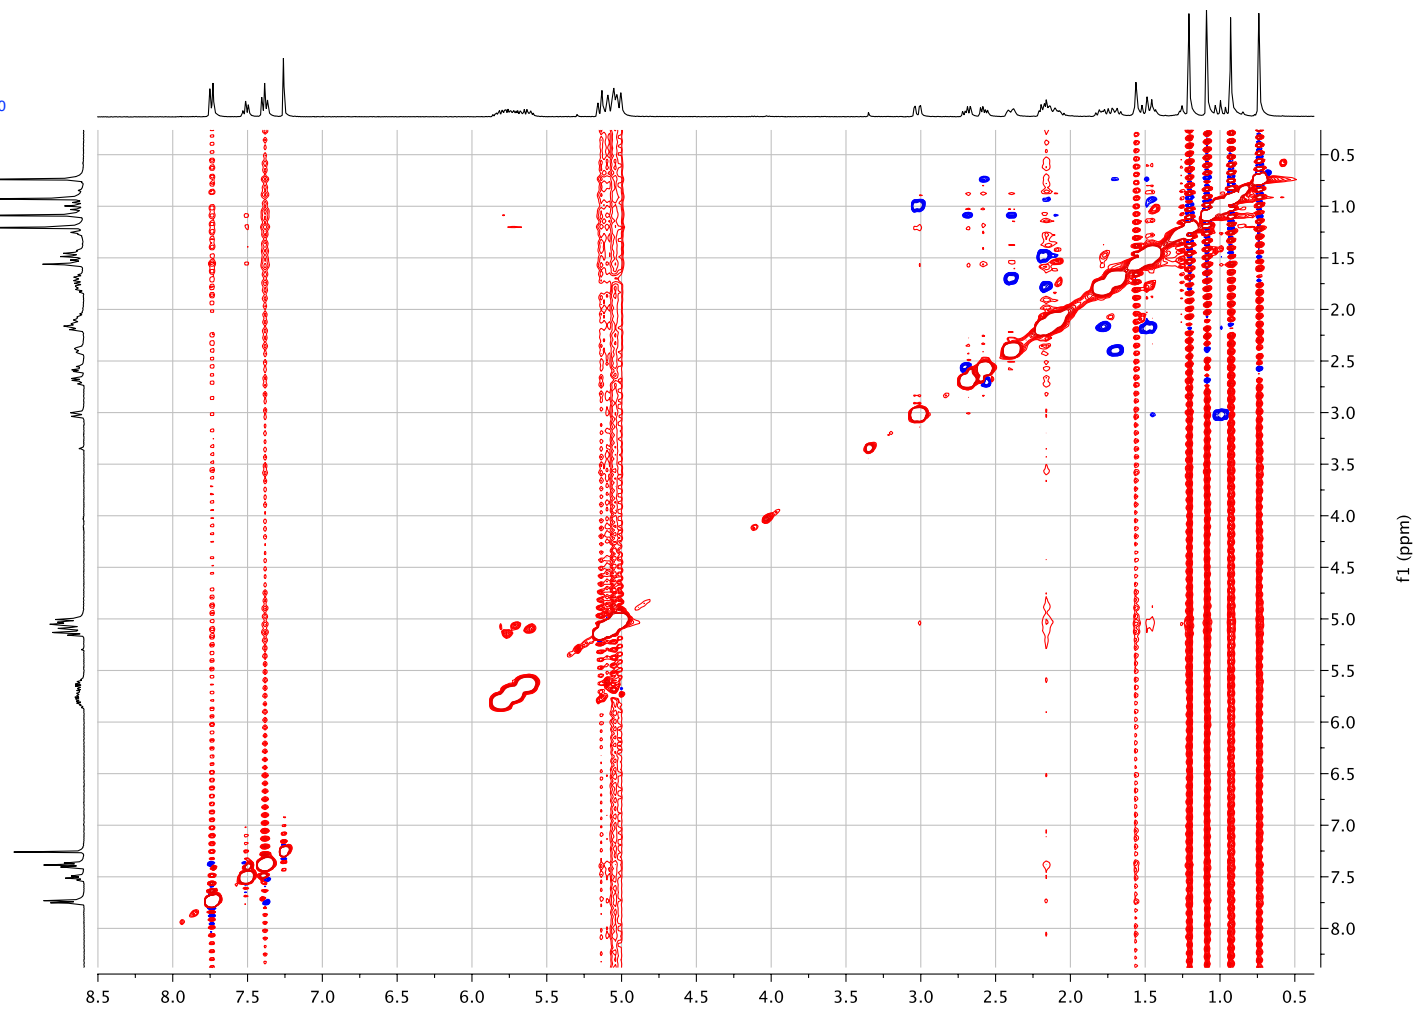

**NOESY Correlations (H21-H6', H22-H11, H10'-H6', H20-H7, H23-H10', H6-H10')**

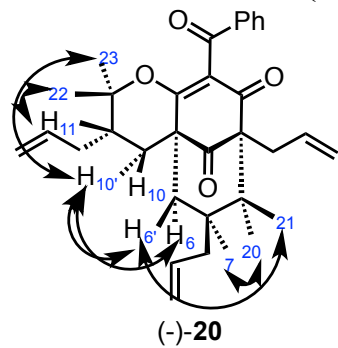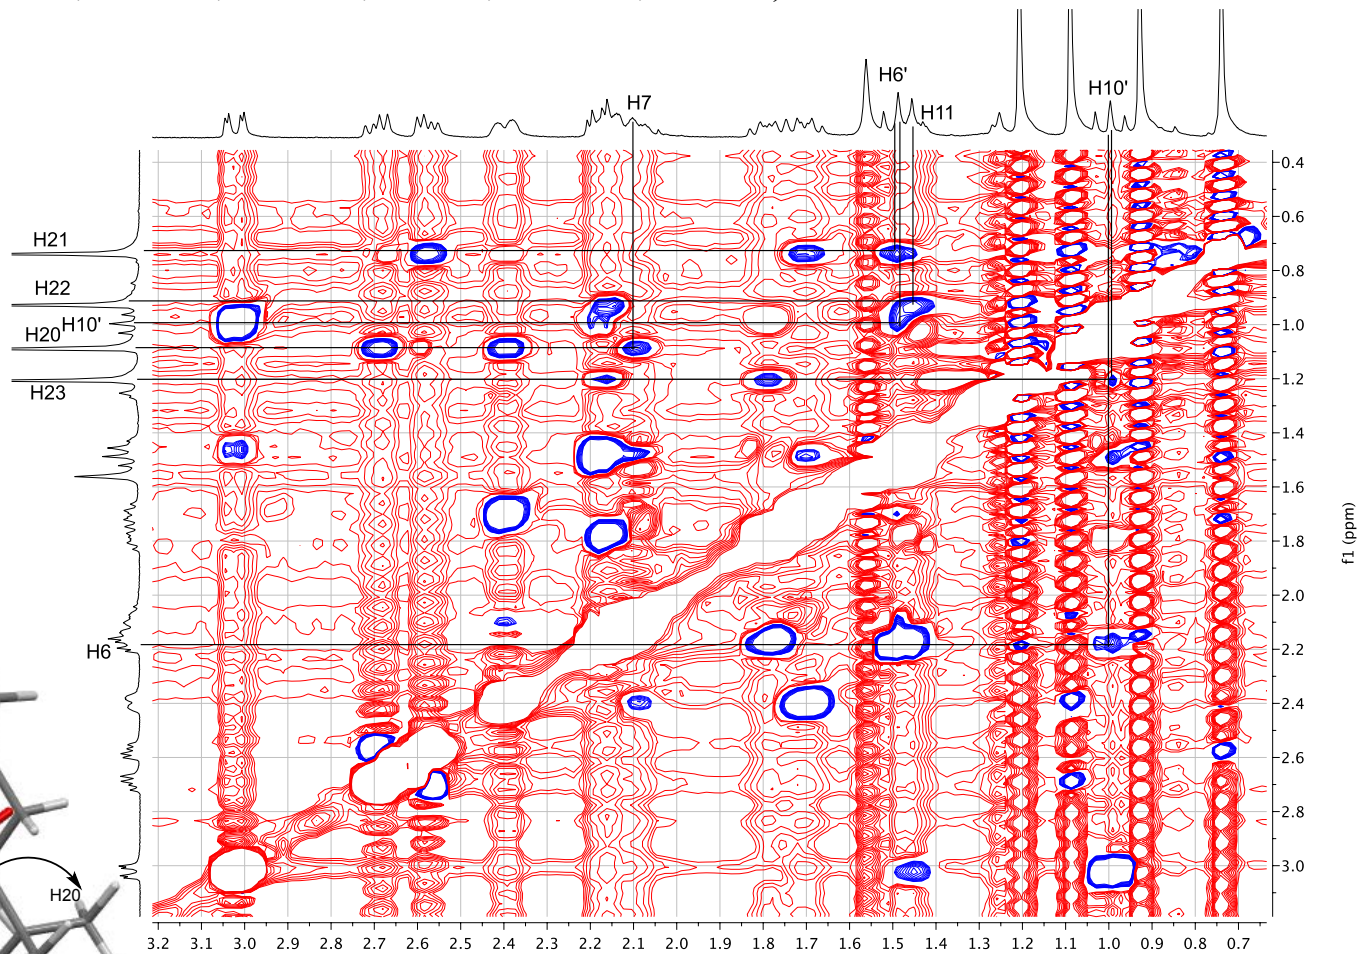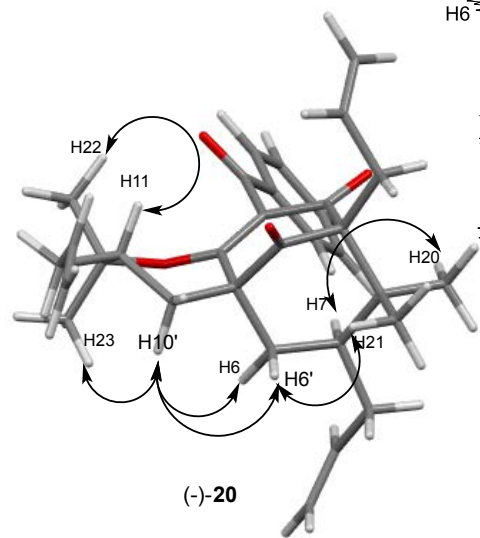

## NOESY Correlations (H10-H11, H28-H20, H28'-H21)

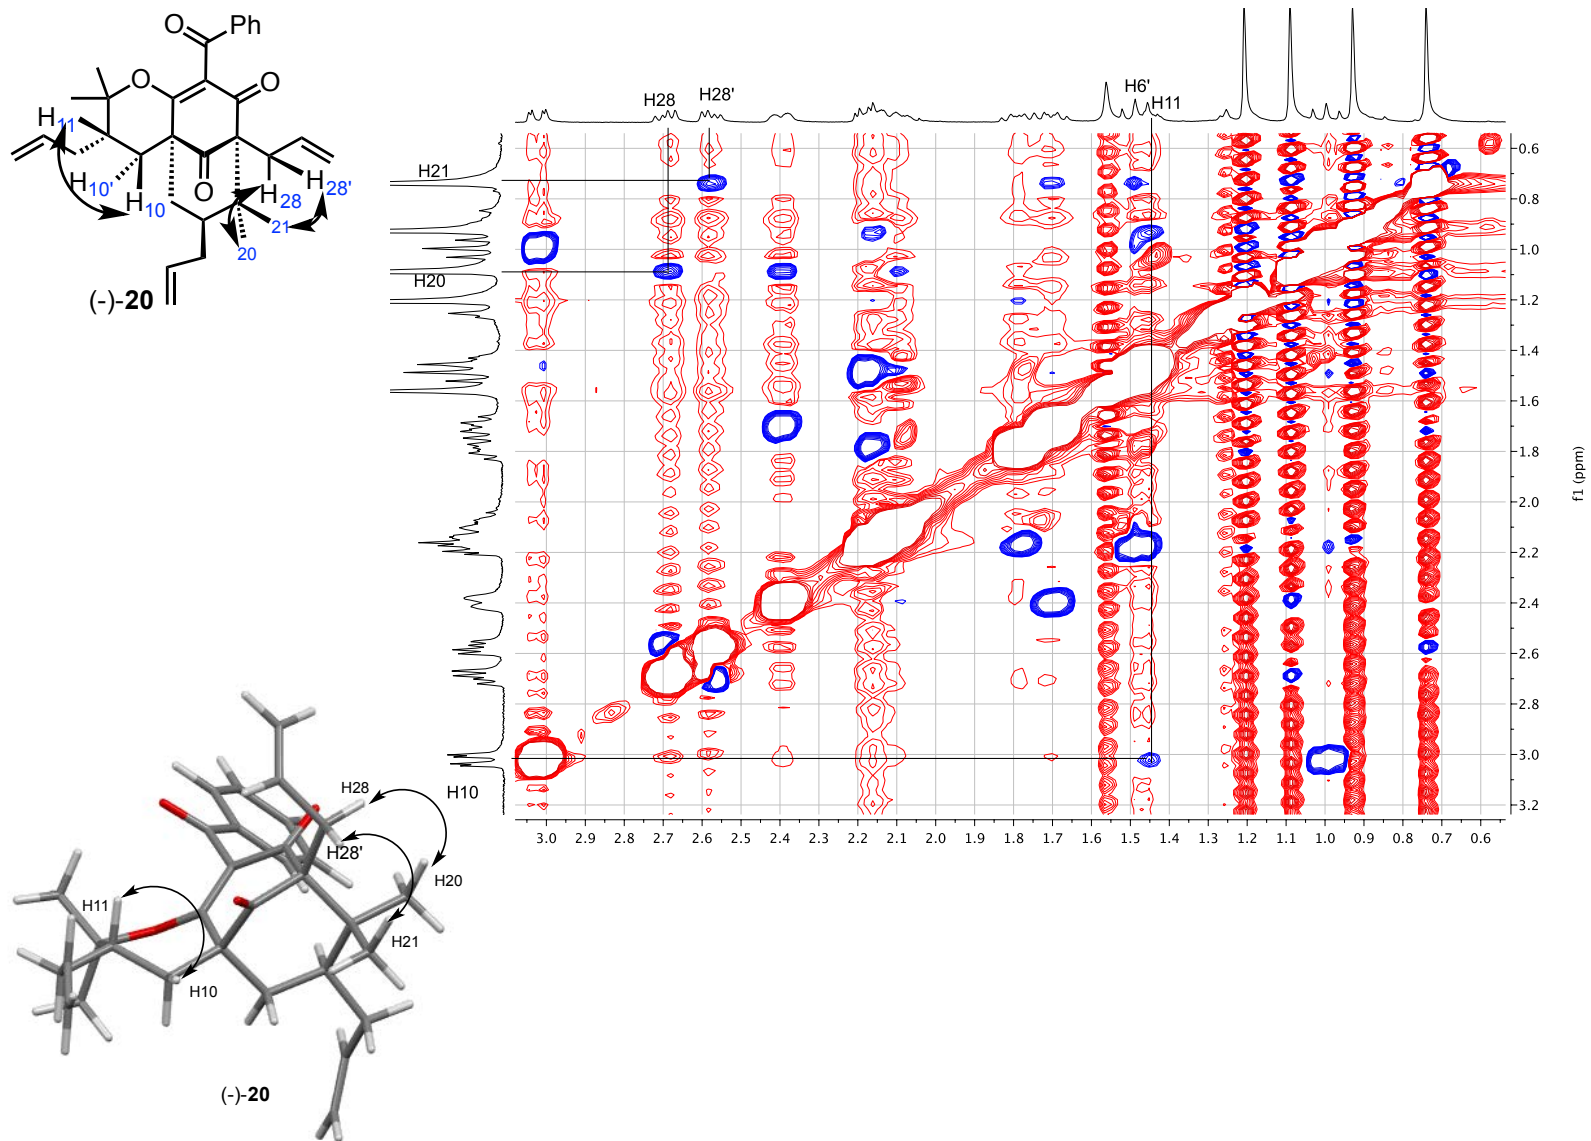

**NOESY Correlation (H7-H25)**  
**NOESY Correlation (H25-H7)**

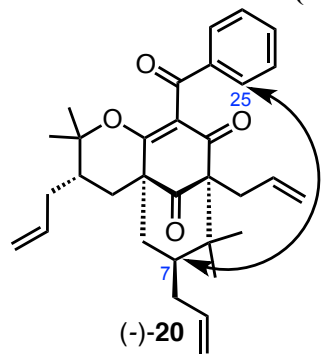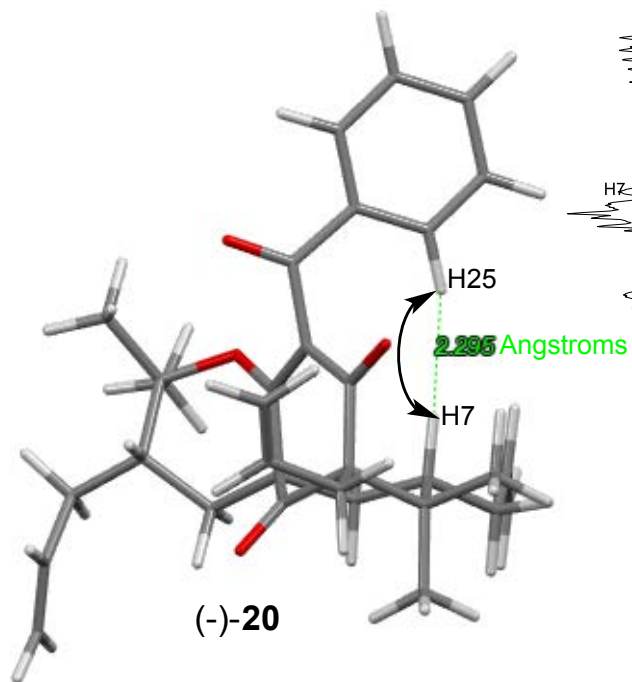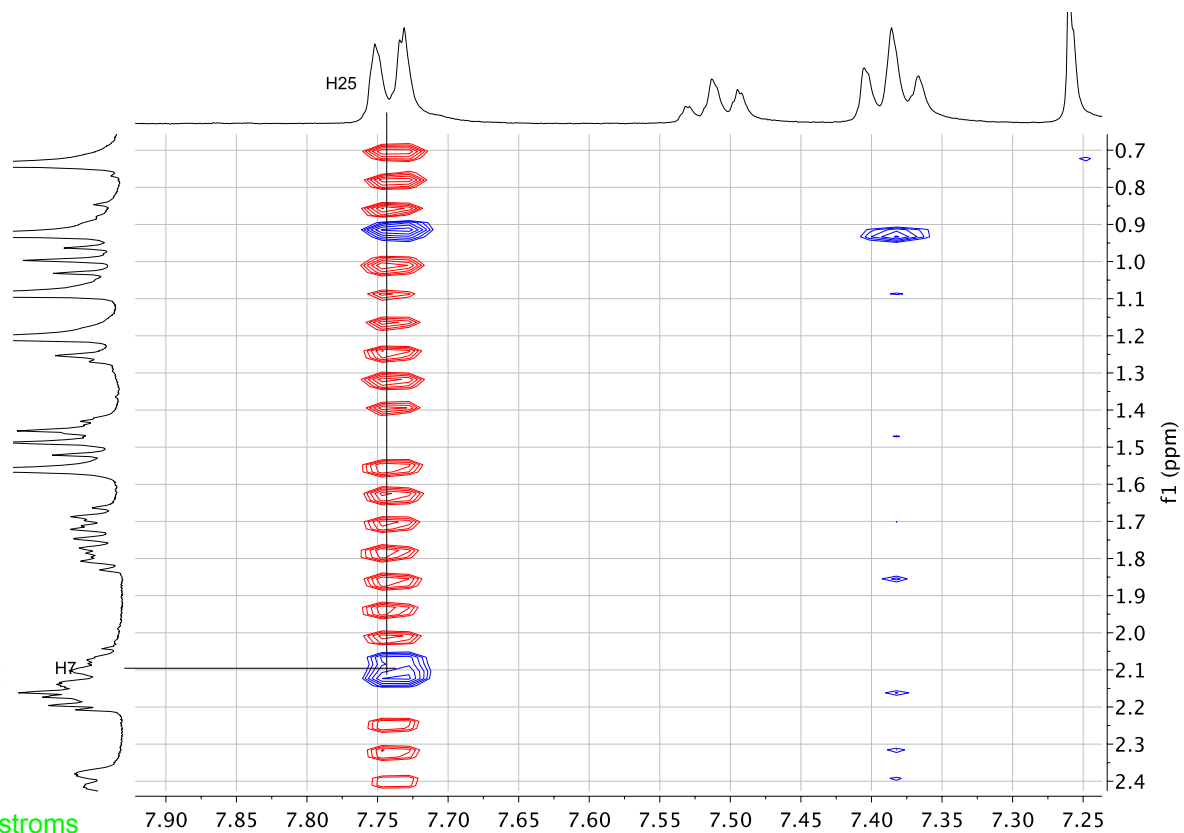

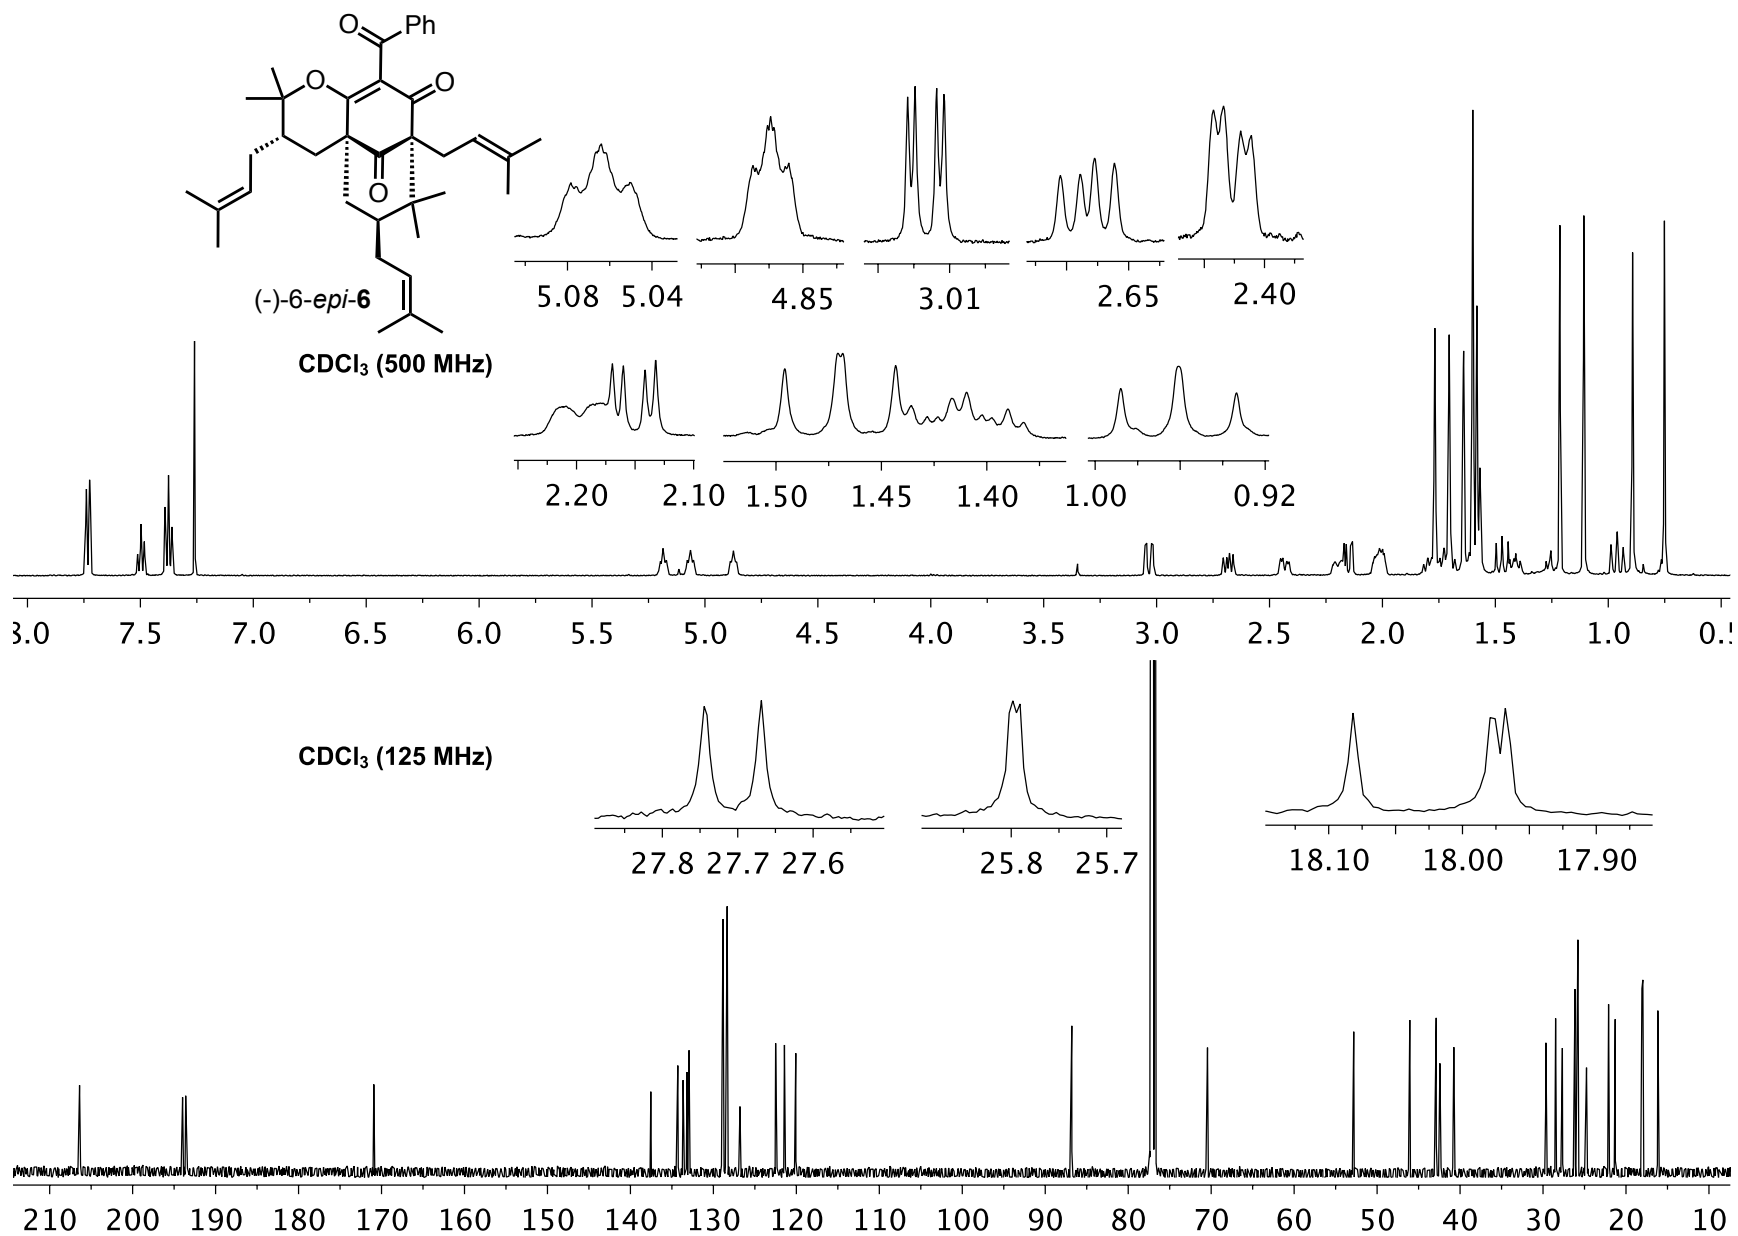



### COSY Correlations for Compound (-)-6-*epi*-6

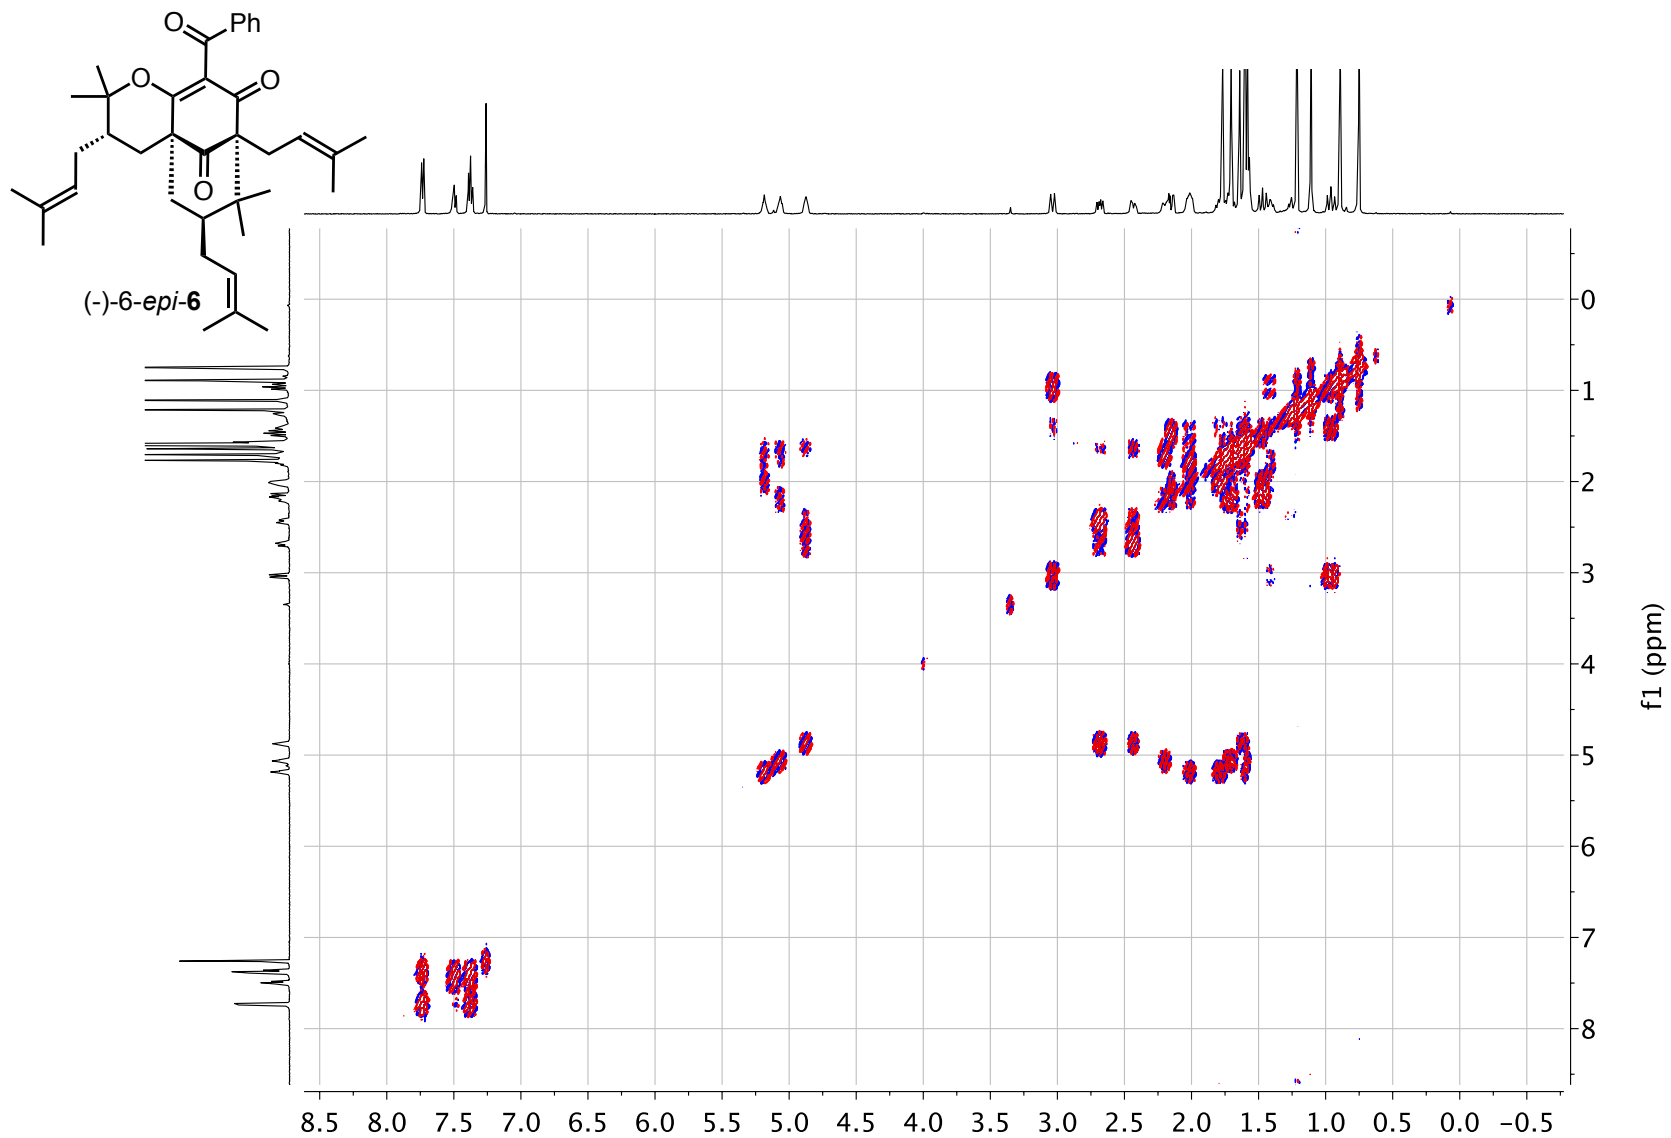

**COSY Correlations (H17'-H18, H14'-H15, H14-H15, H17-H18, H28'-H29, H28-H29)**

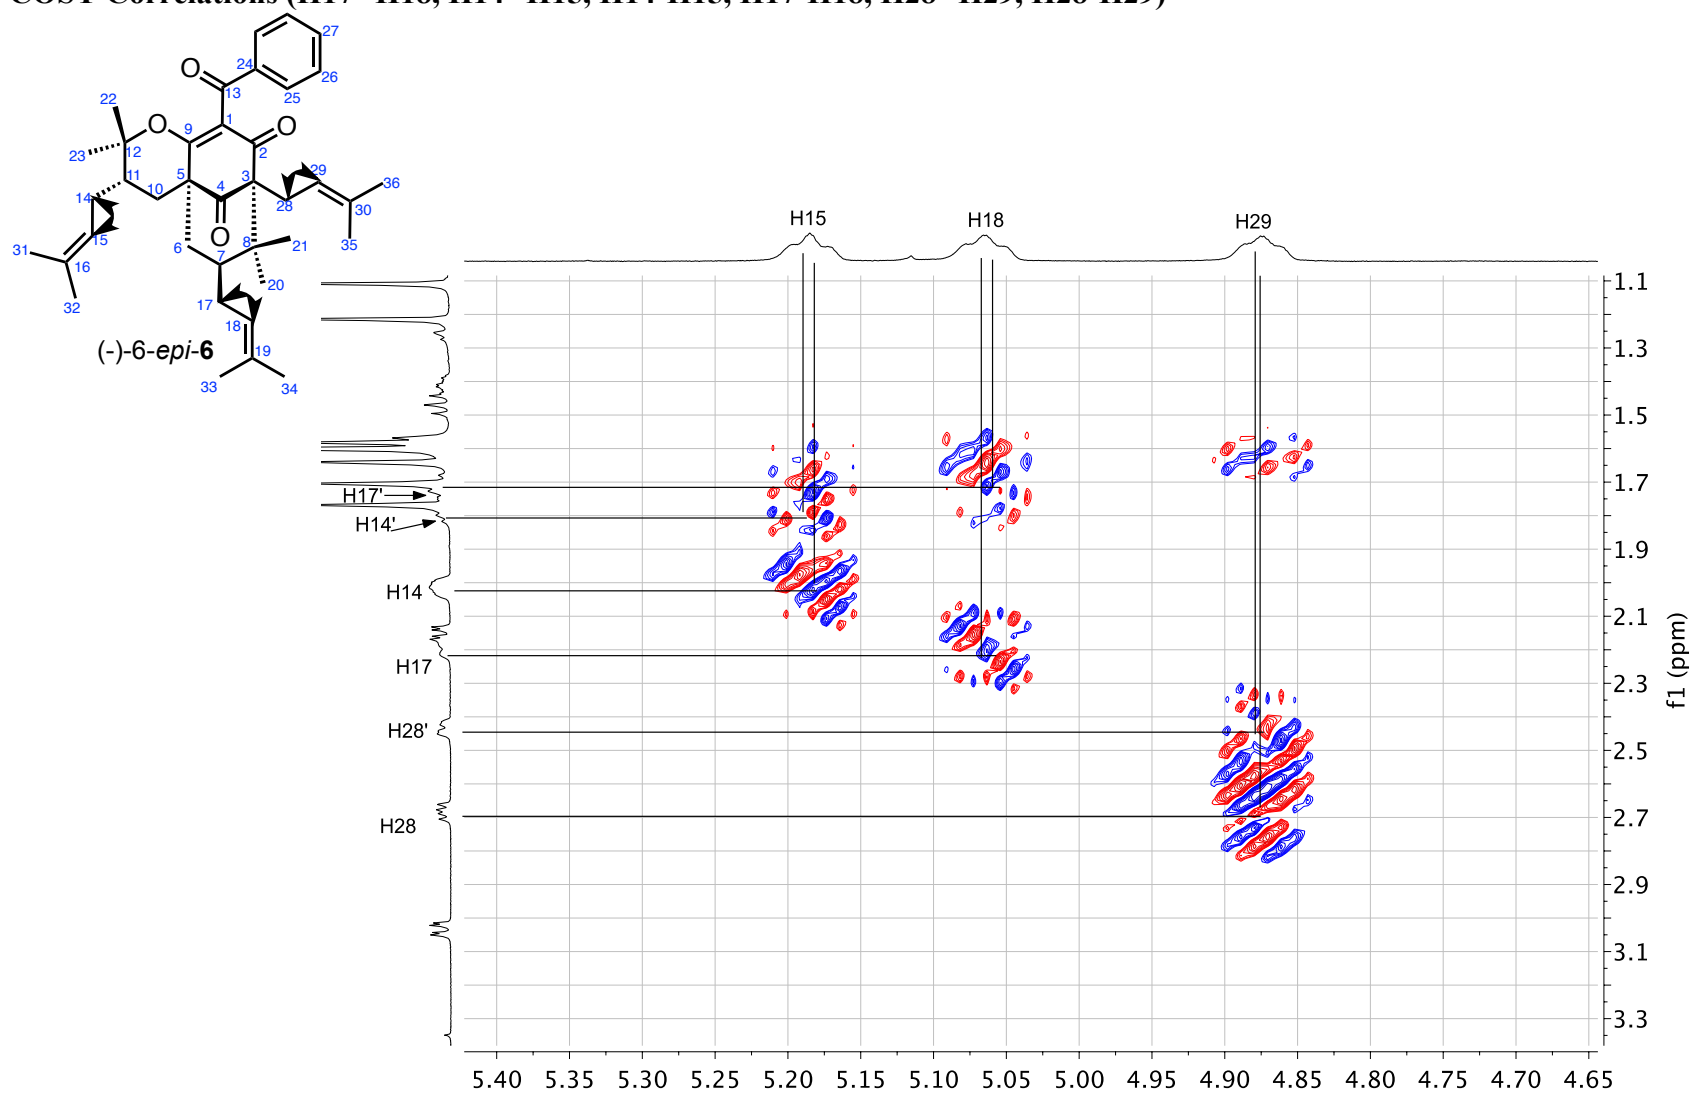

**COSY Correlations (H10'-H10, H10'-H11, H11-H10, H11-H14', H6'-H6, H6'-H7, H17'-H17, H14'-H14, H7-H6, H17-H7)**

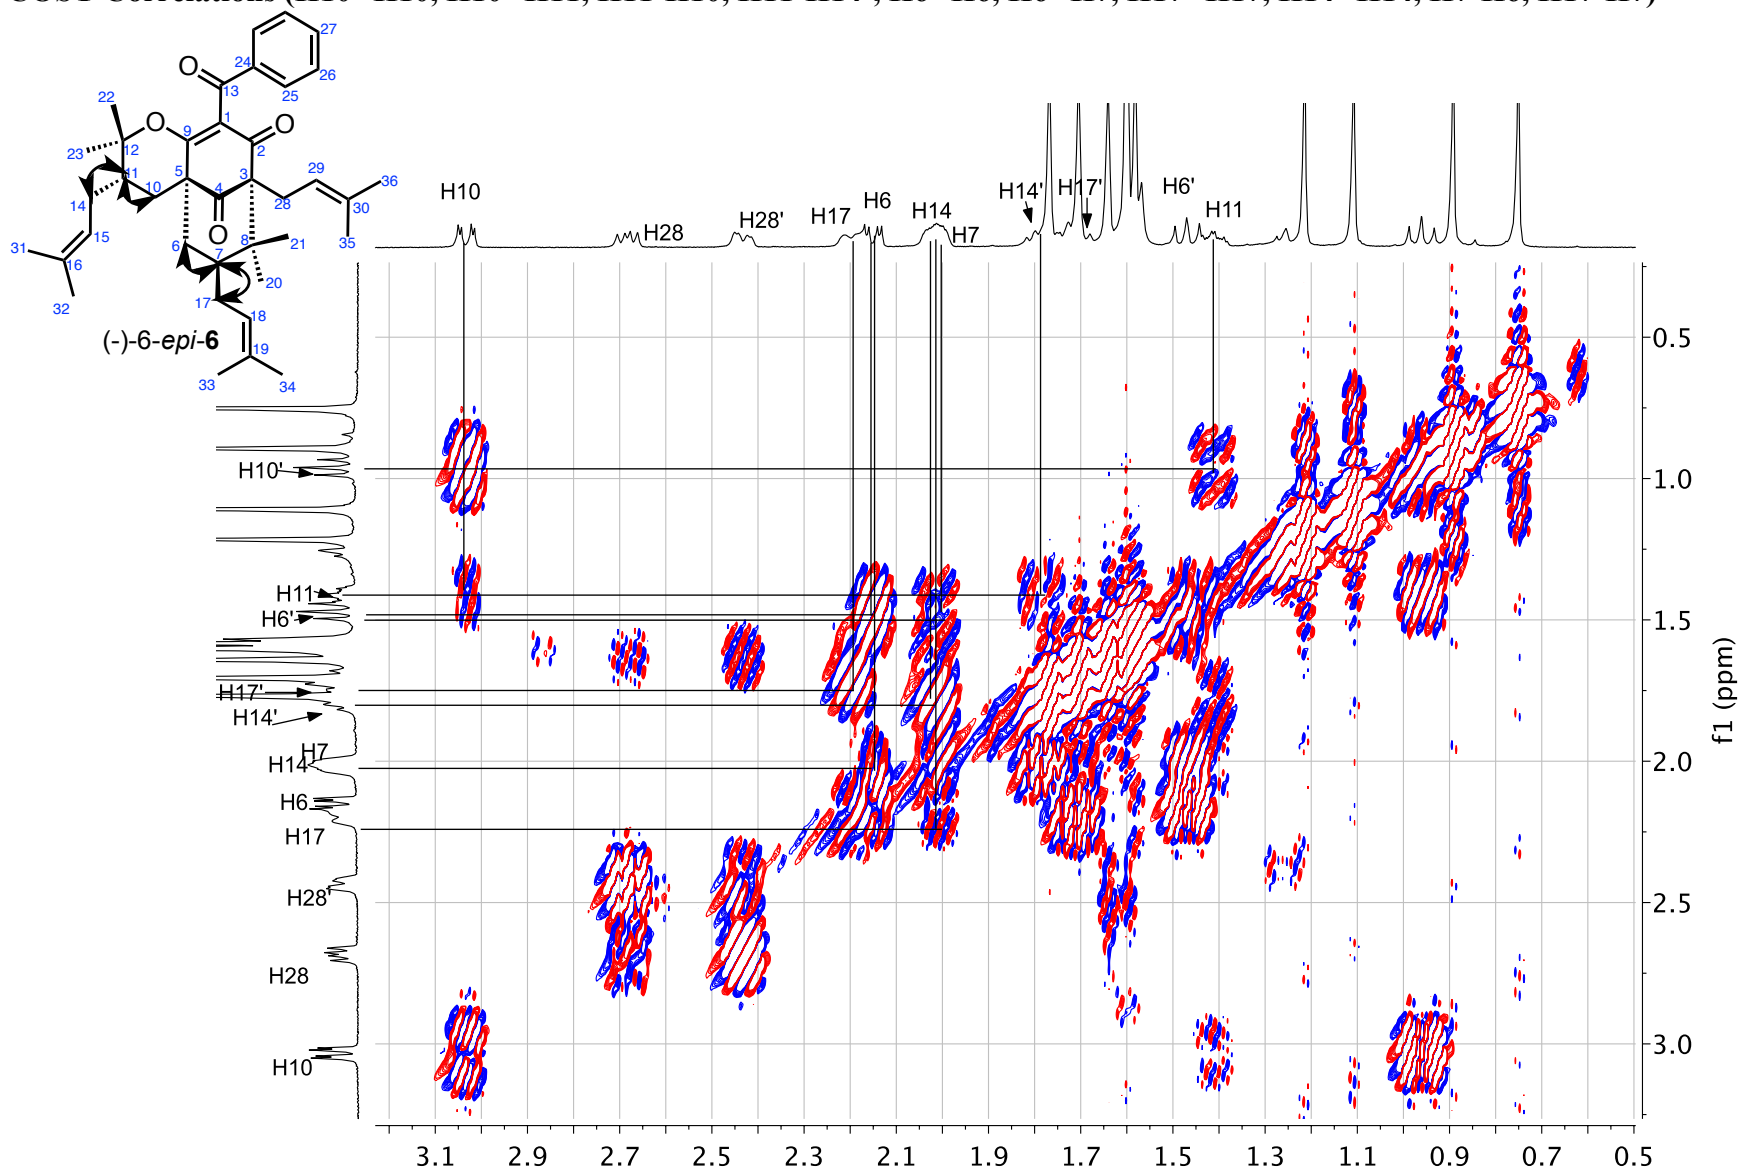

### HSQC Correlations for Compound (-)-6-*epi*-6

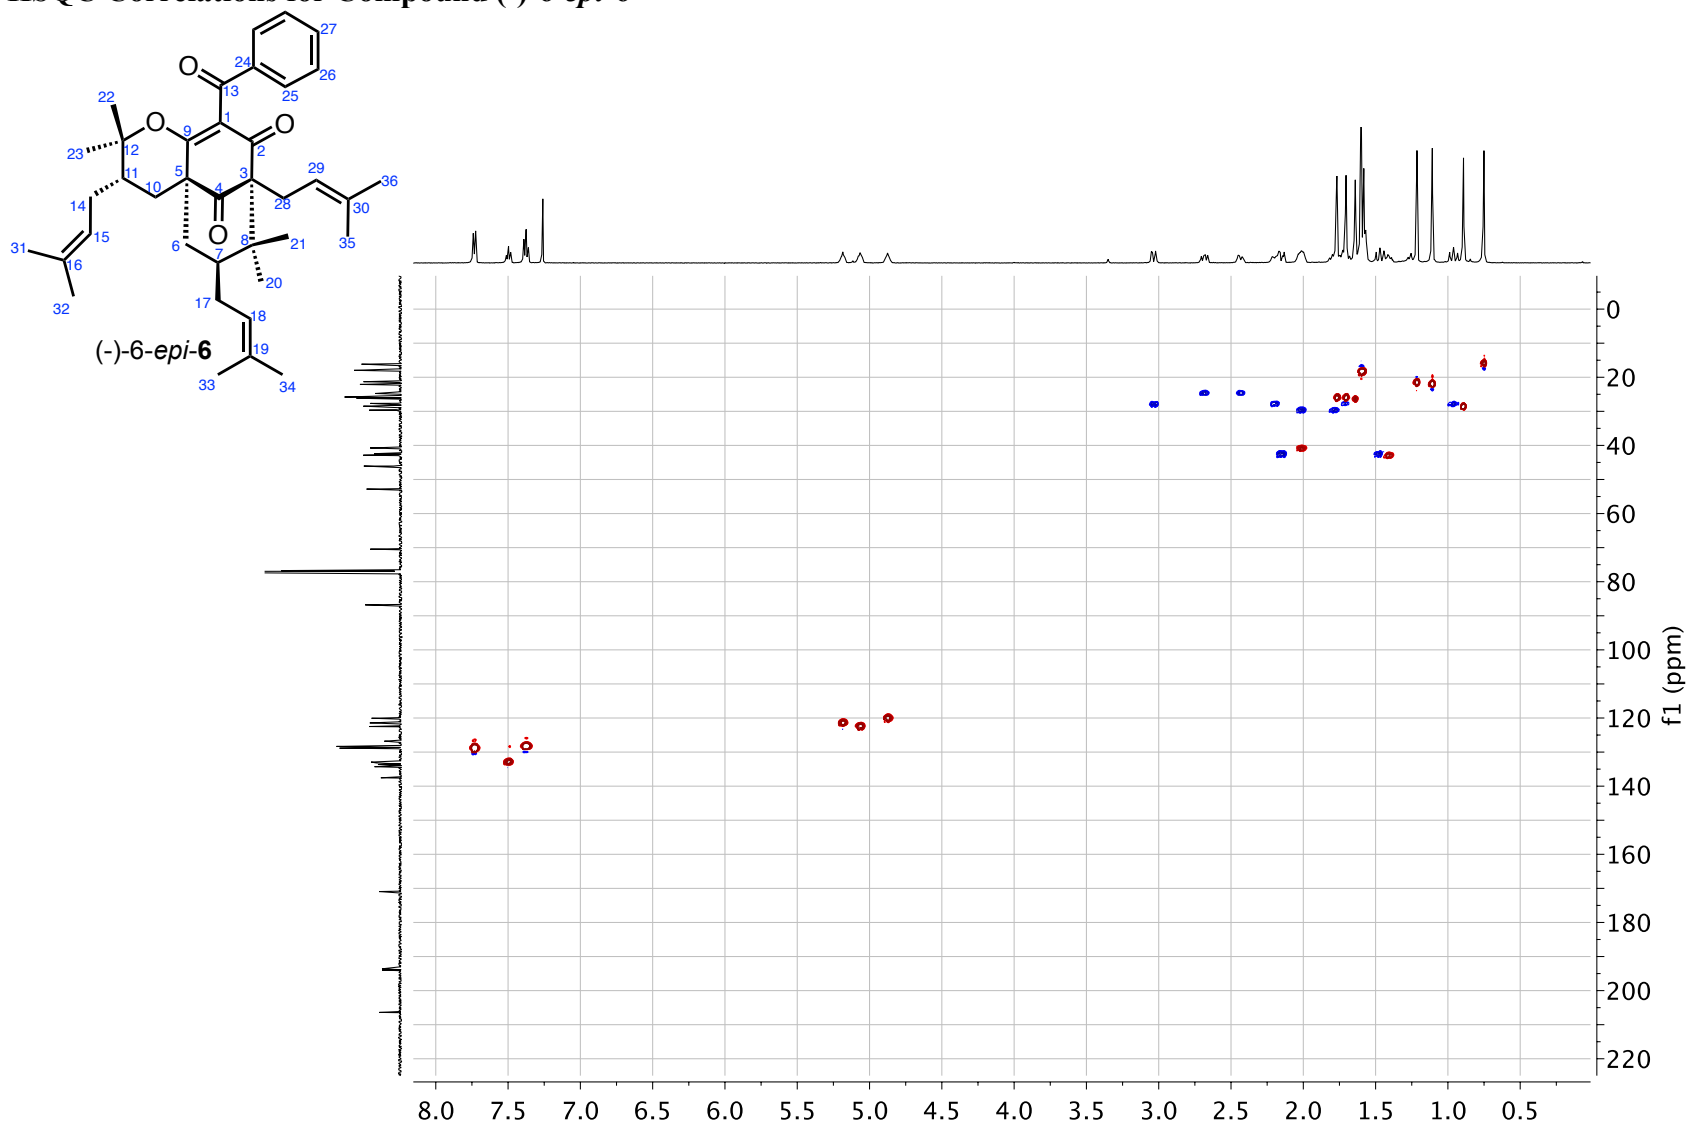

# HSQC Correlations (C7-H7, C6-H6, C11-H11)

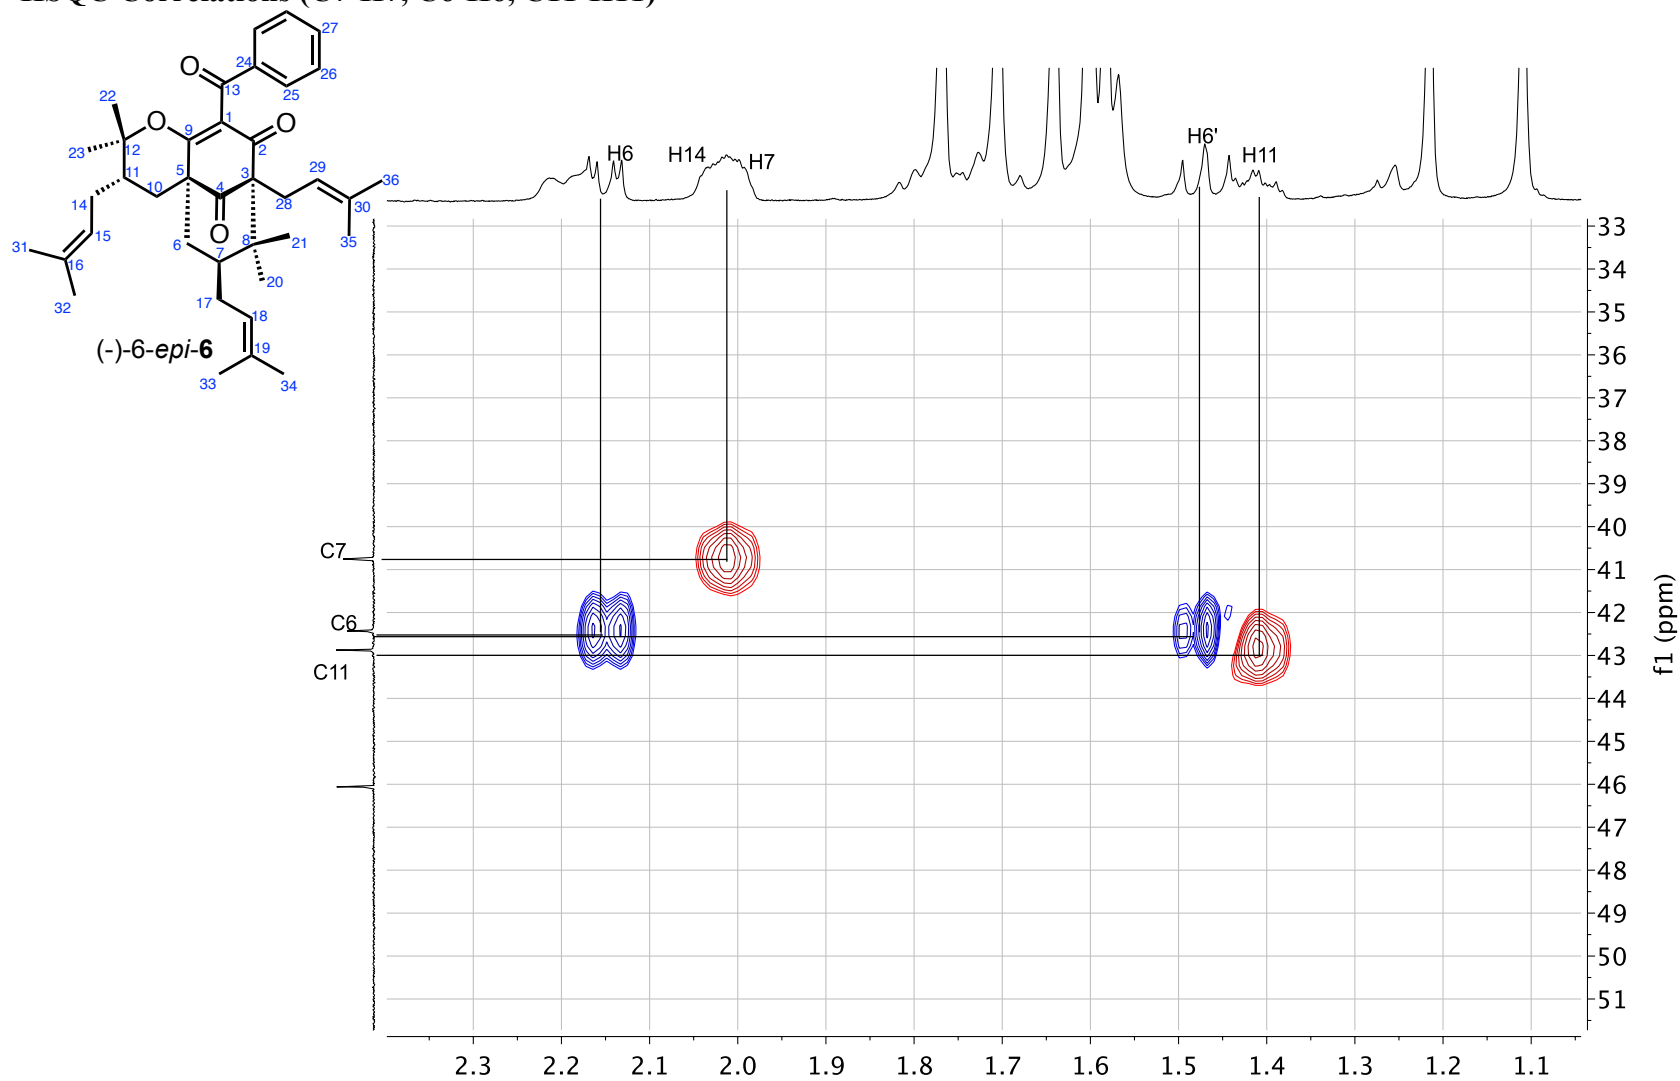

# HSQC Correlations (C21-H21, C23-H23, C20-H20, C22-H22)

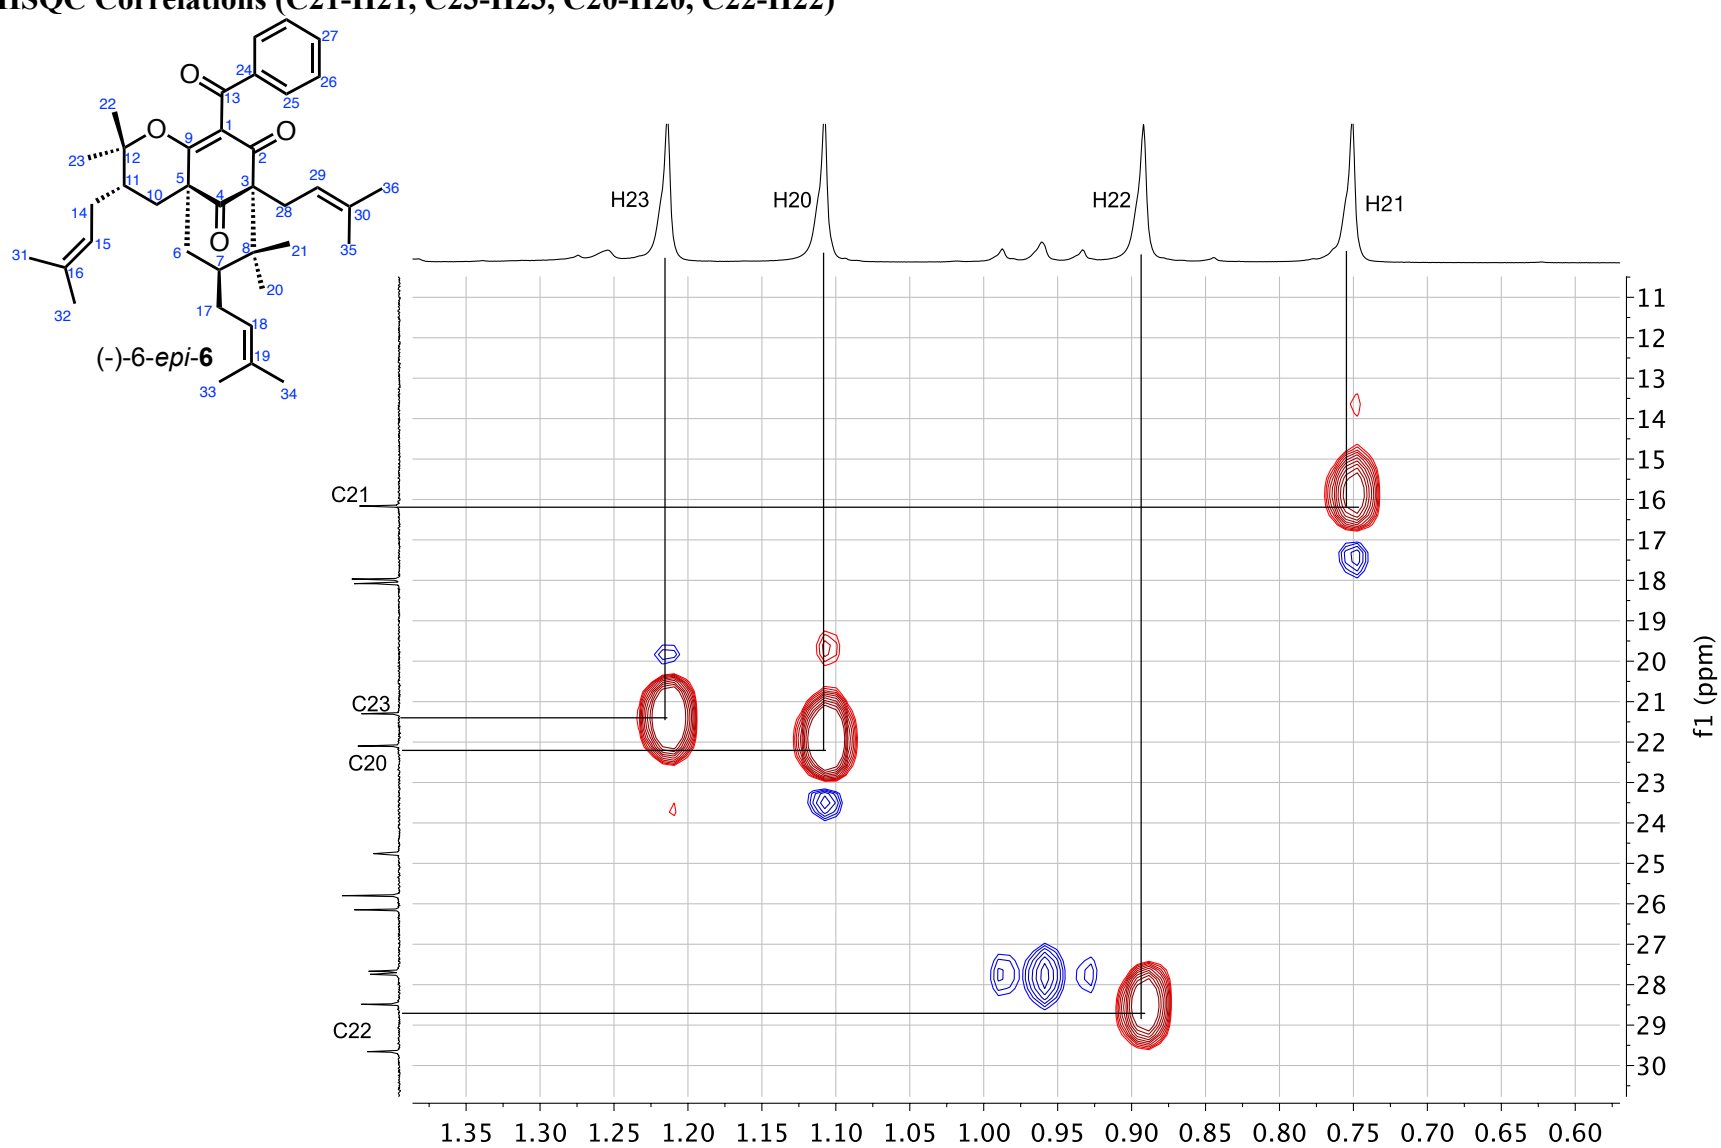

# HMBC Correlations for Compound (-)-6-*epi*-6

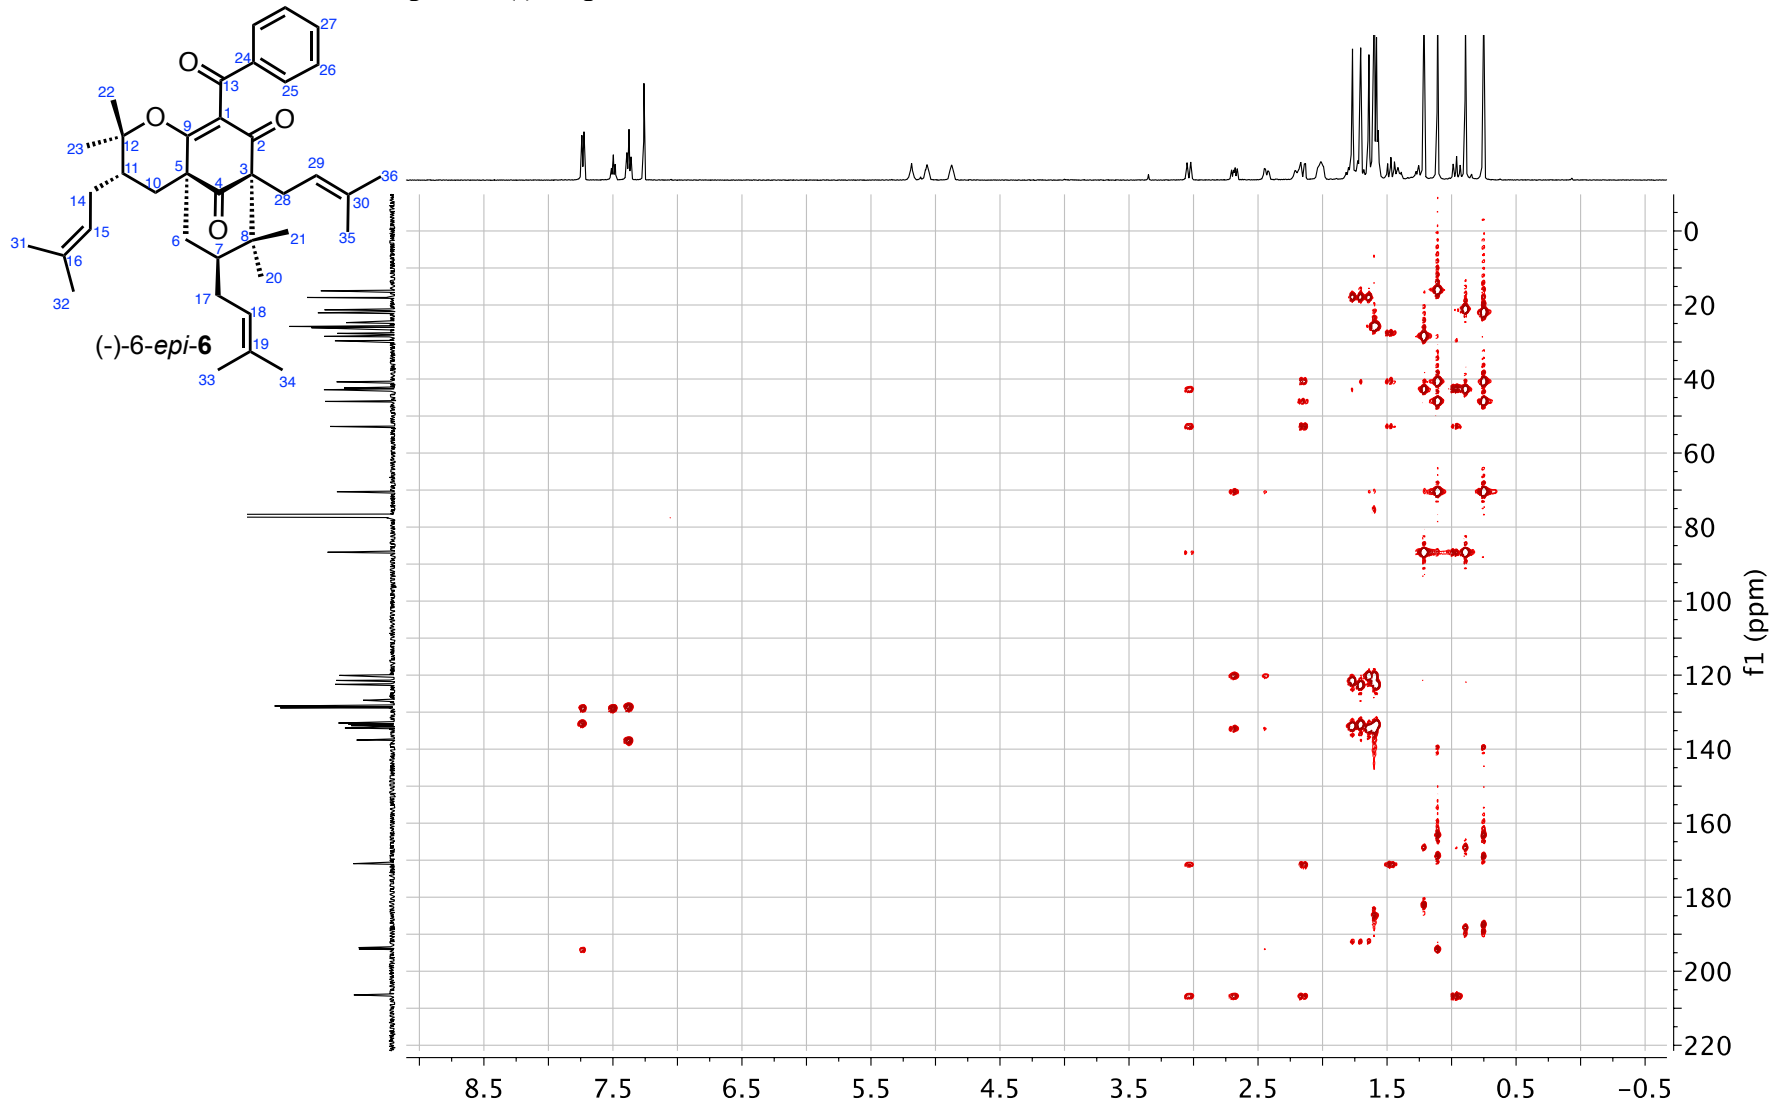

HMBC Correlations (C7-H20, C7-H21, C11-H23, C11-H10', C11-H22, C8-H20, C8-H21, C3-H20, C3-H21, C12-H23, C12-H22)

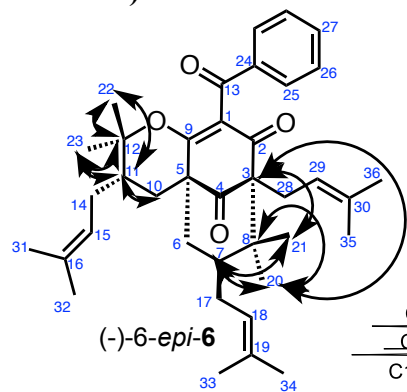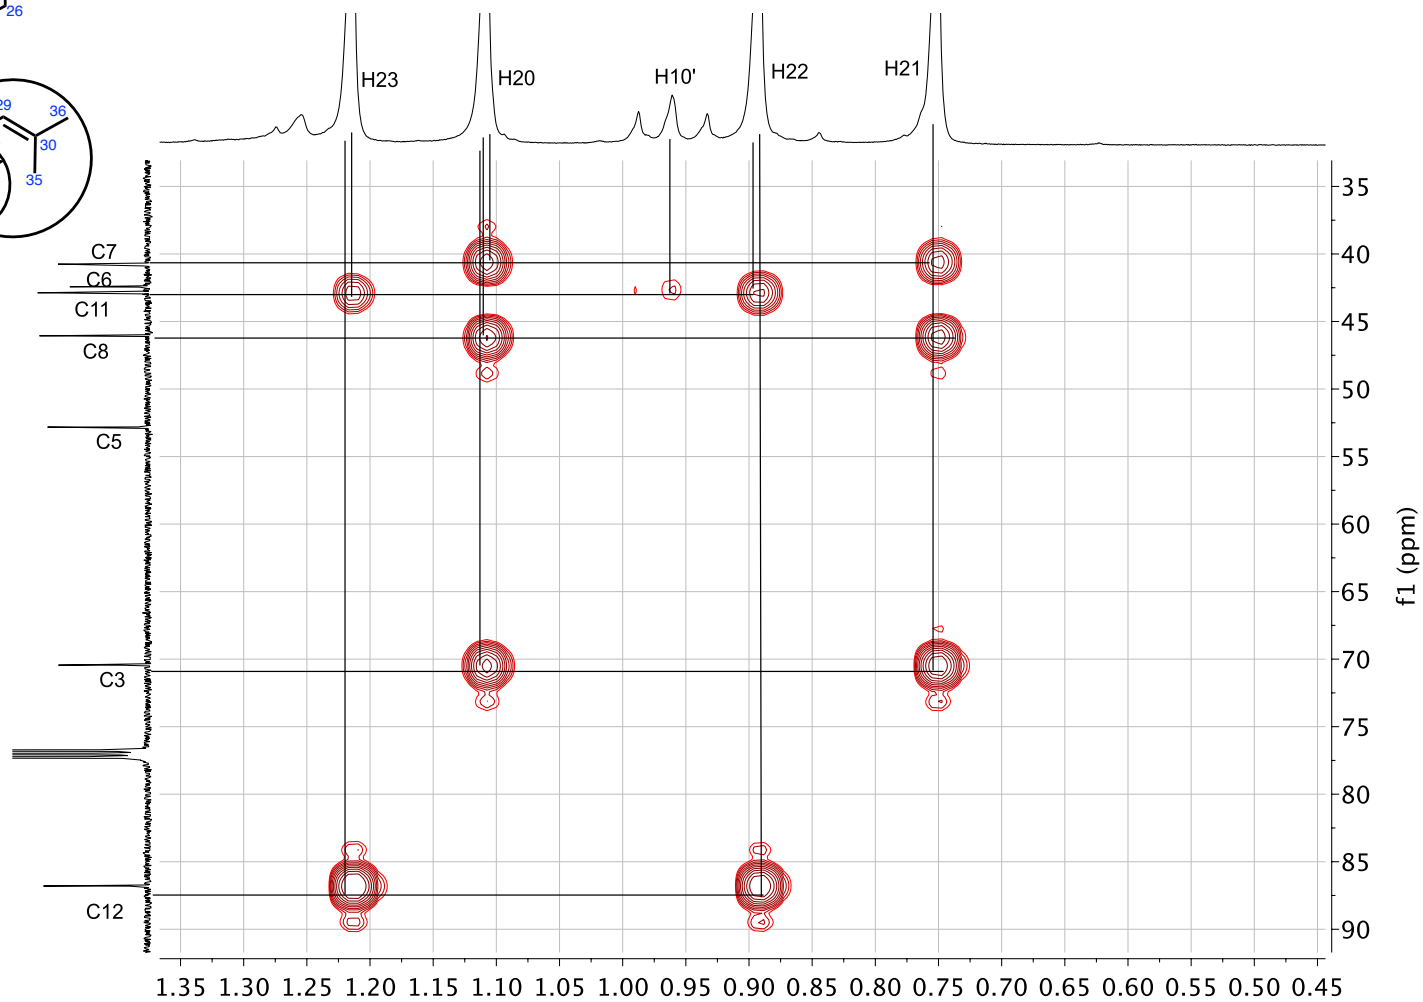



HMBC Correlations (C7-H6, C6-H7, C11-H10, C8-H28, C8-H6, C5-H10, C5-H6, C3-H28, C3-H28', C12-H10)

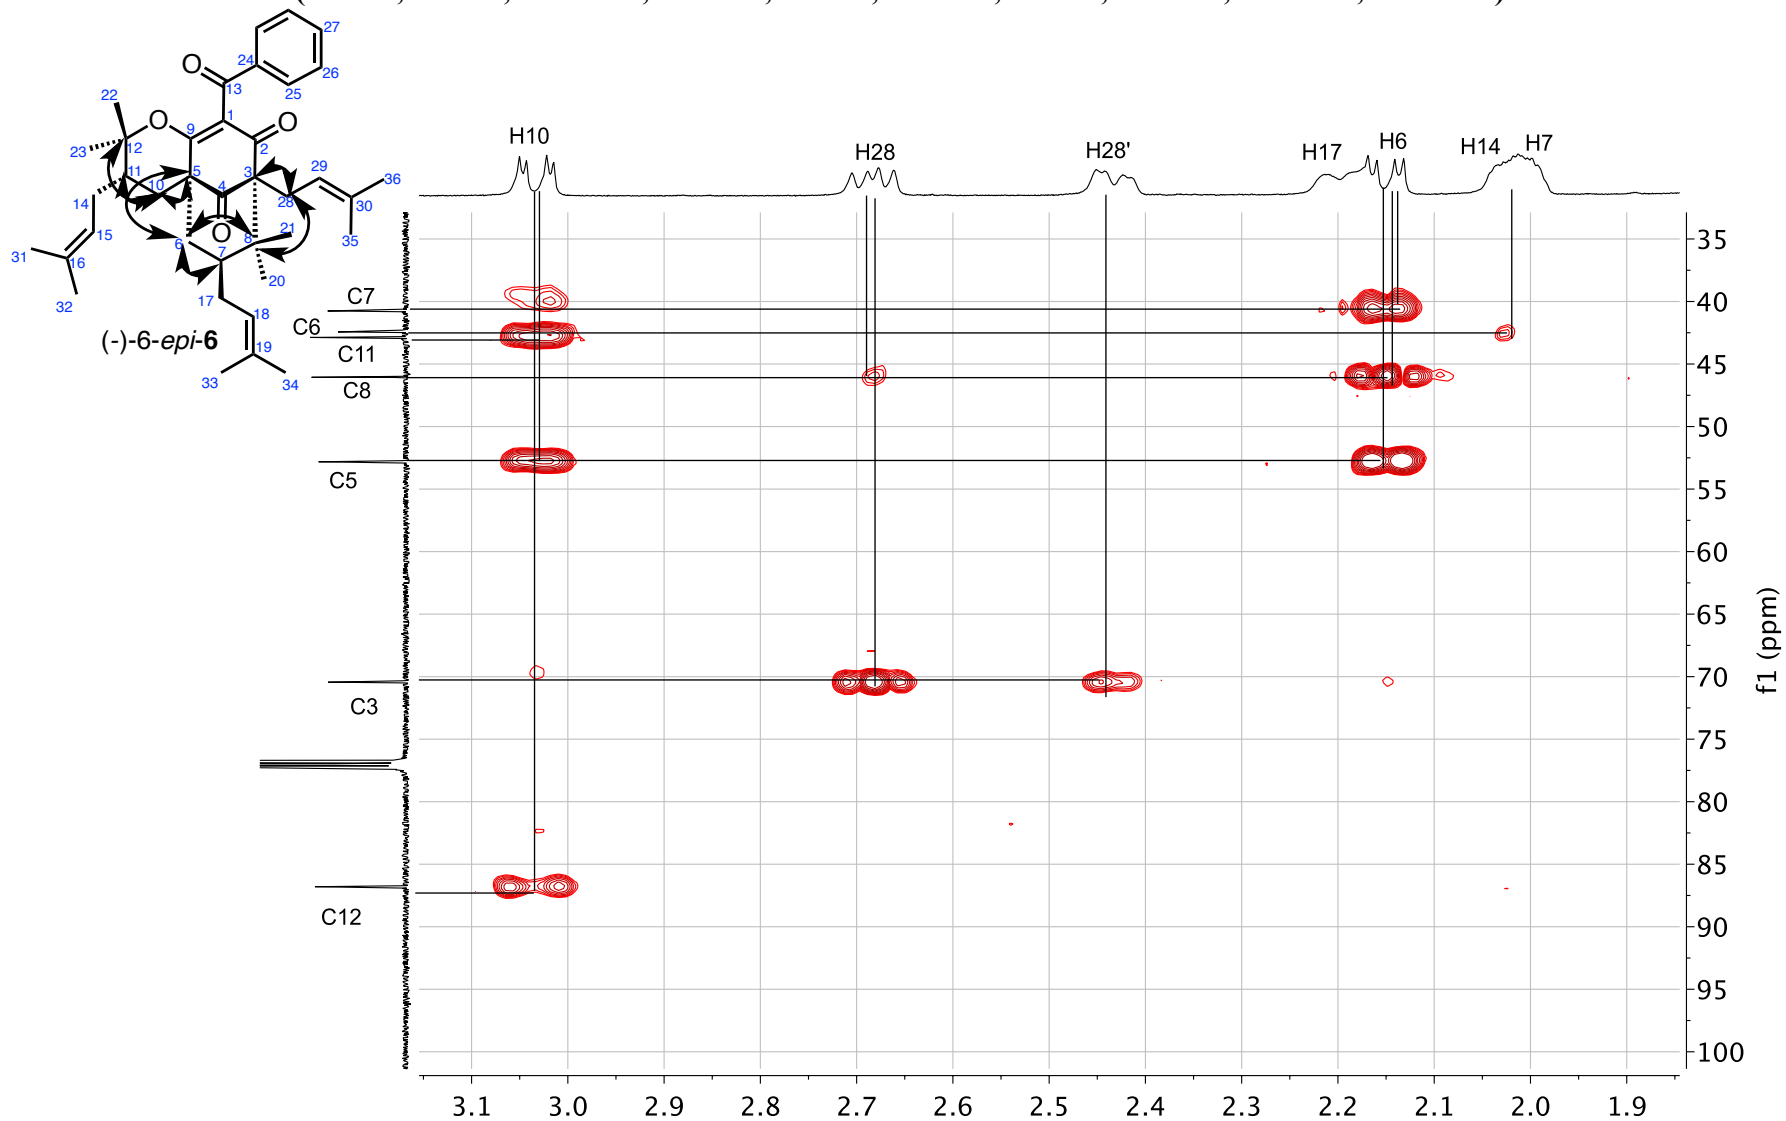

**HMBC Correlations (C29-H36, C29-H35, C15-H32, C15-H31, C18-H34, C18-H33, C19-H34, C19-H33, C16-H32, C16-H31, C30-H36)**

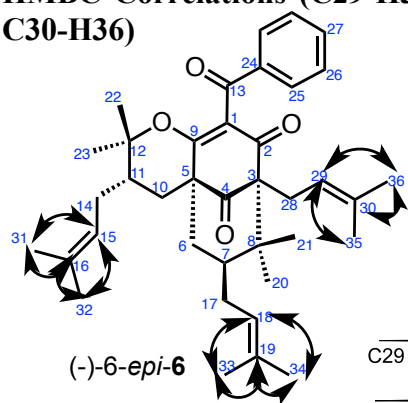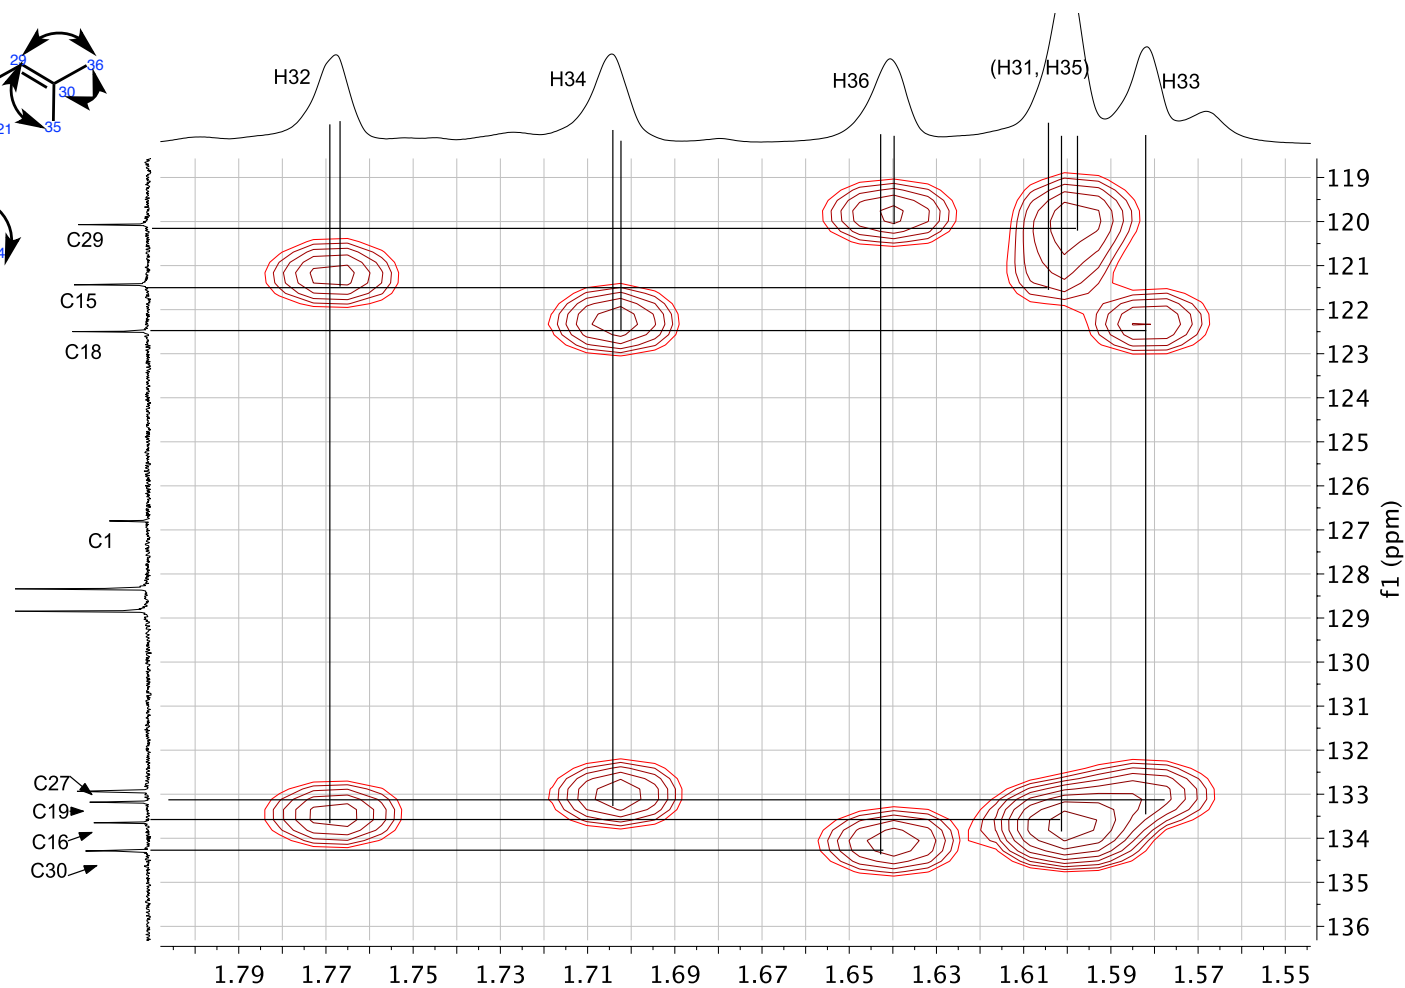

# NOESY Correlations for Compound (-)-6-*epi*-6

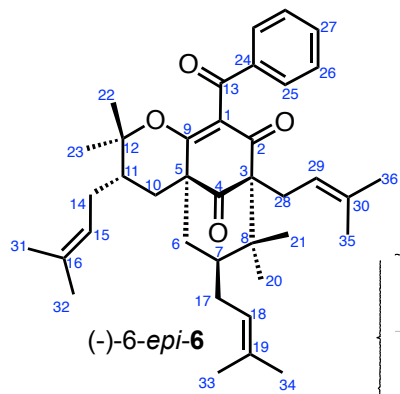

(-)-6-*epi*-6

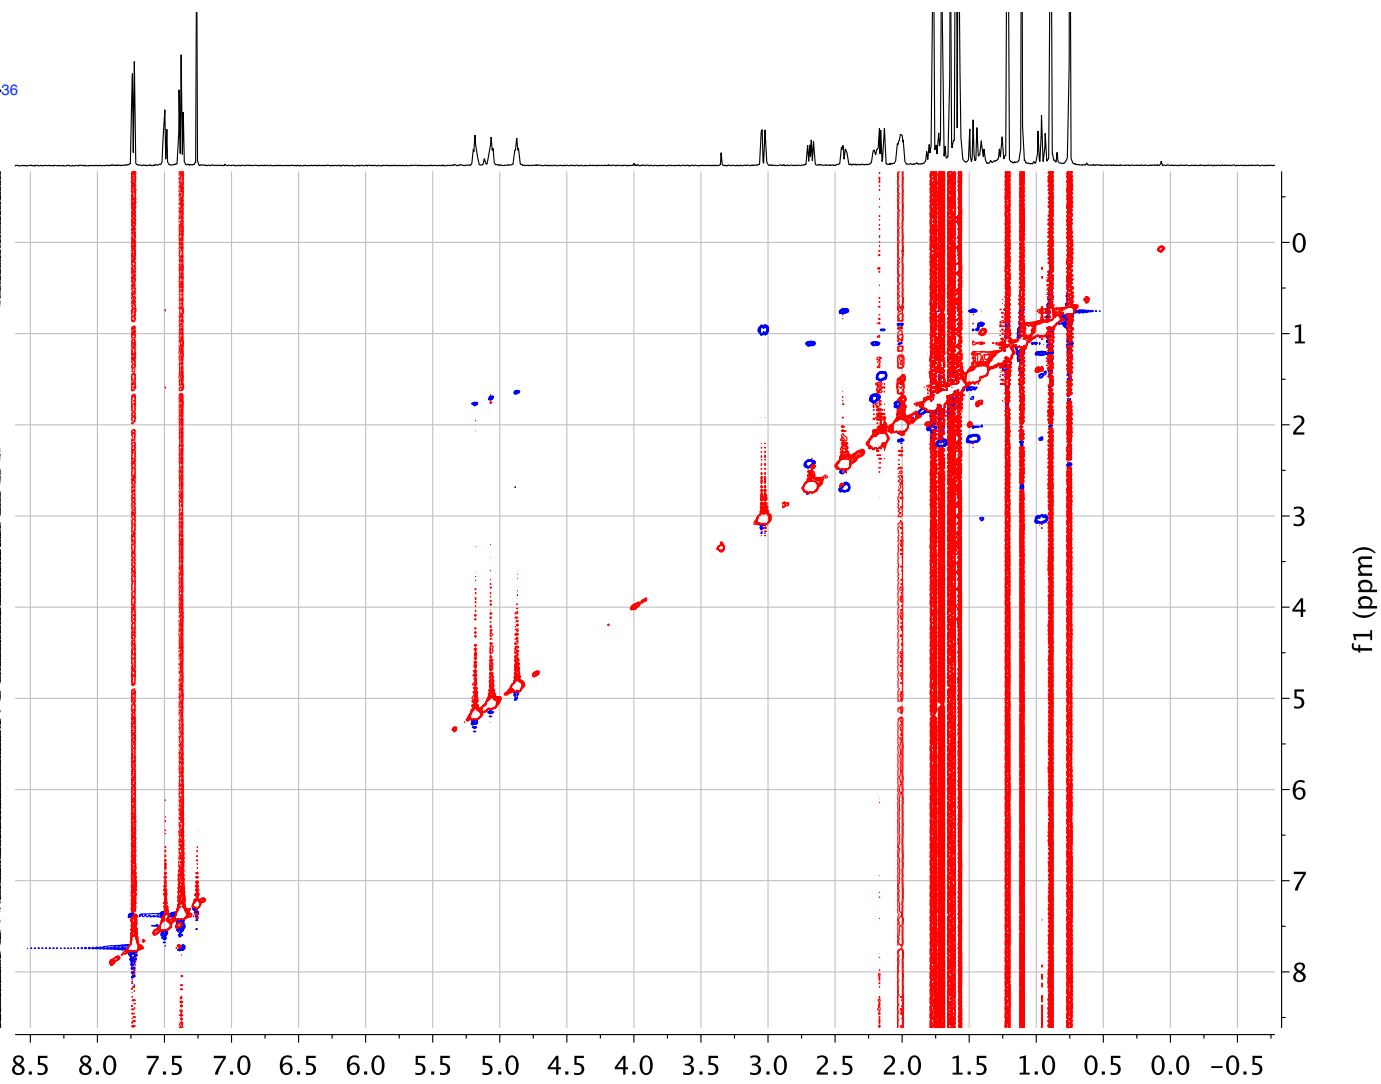

# NOESY Correlations (H36-H29, H34-H18, H32-H15)

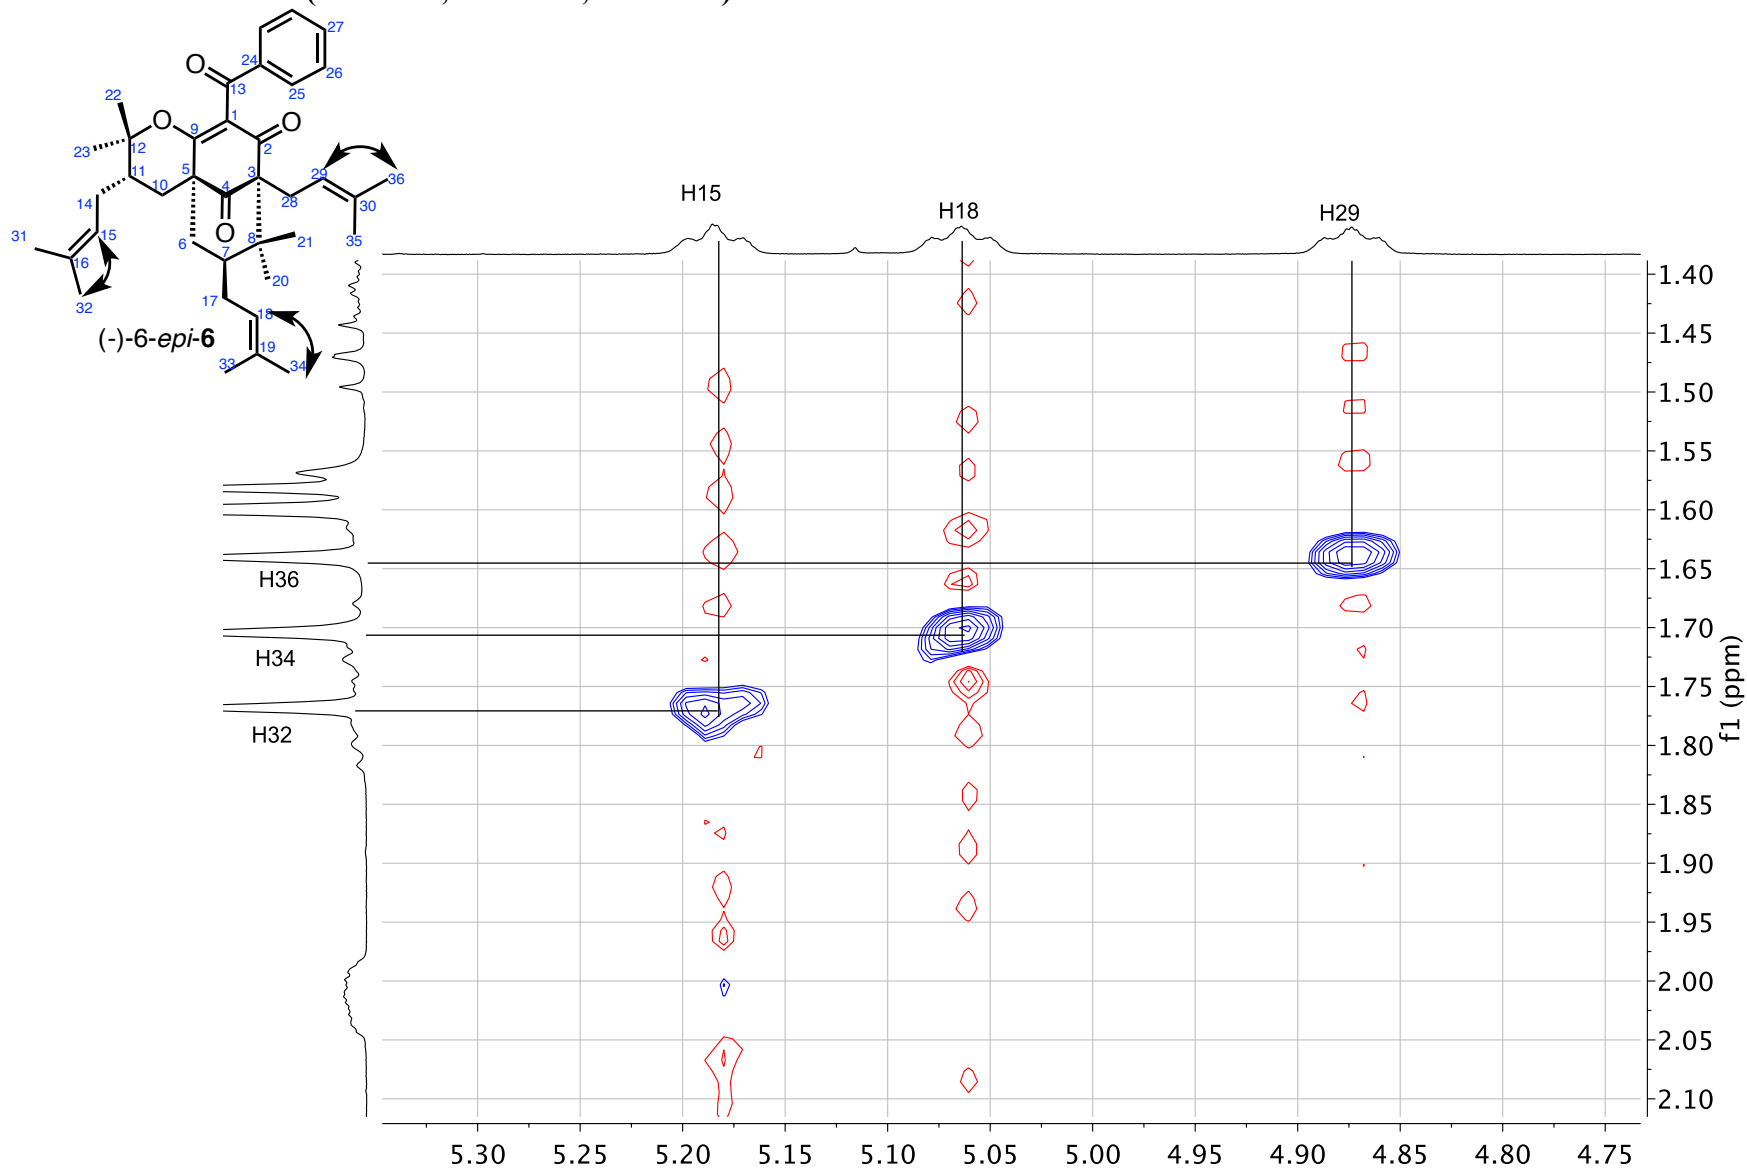

NOESY Correlations (H21-H28', H21-H17', H21-H6', H22-H11 (indicates orientation of H22), H22-H14, H10'-H6, H10'-H6', H20-H28, H20-H17, H20-H7 (directionality of H20), H23-H14', H23-H10' (indicates orientation of H10'), H10-H11 (indicates orientation of H10)).

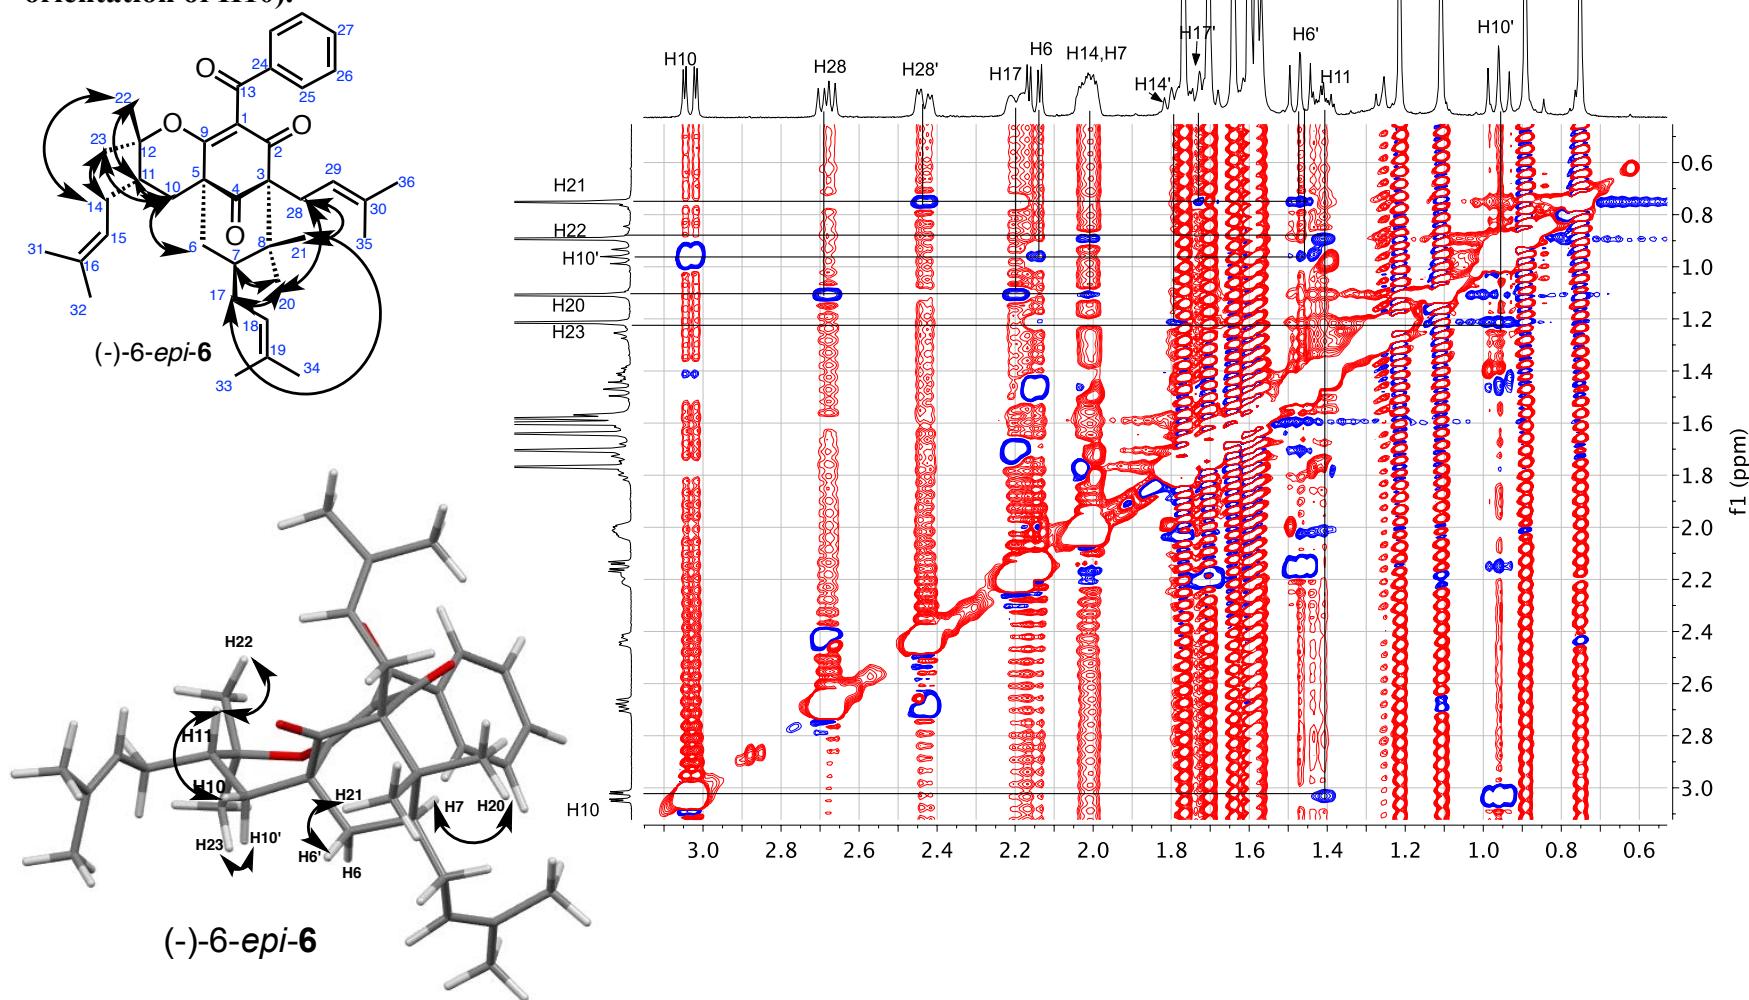

H22-H11, H23-H10', H10-H11, H20-H7, H21-H6'  
 Key Diagnostic Evidence: H11 does not come into proximity with H6.

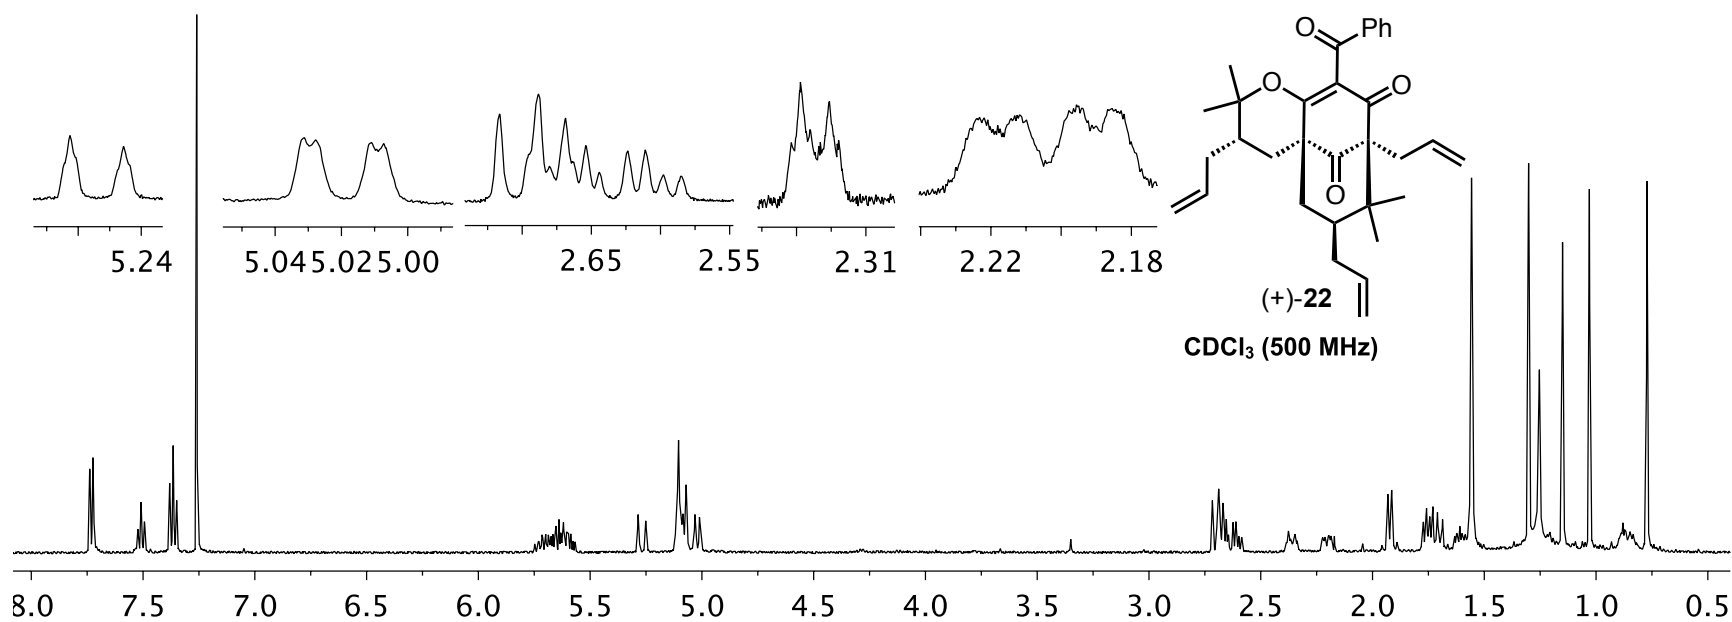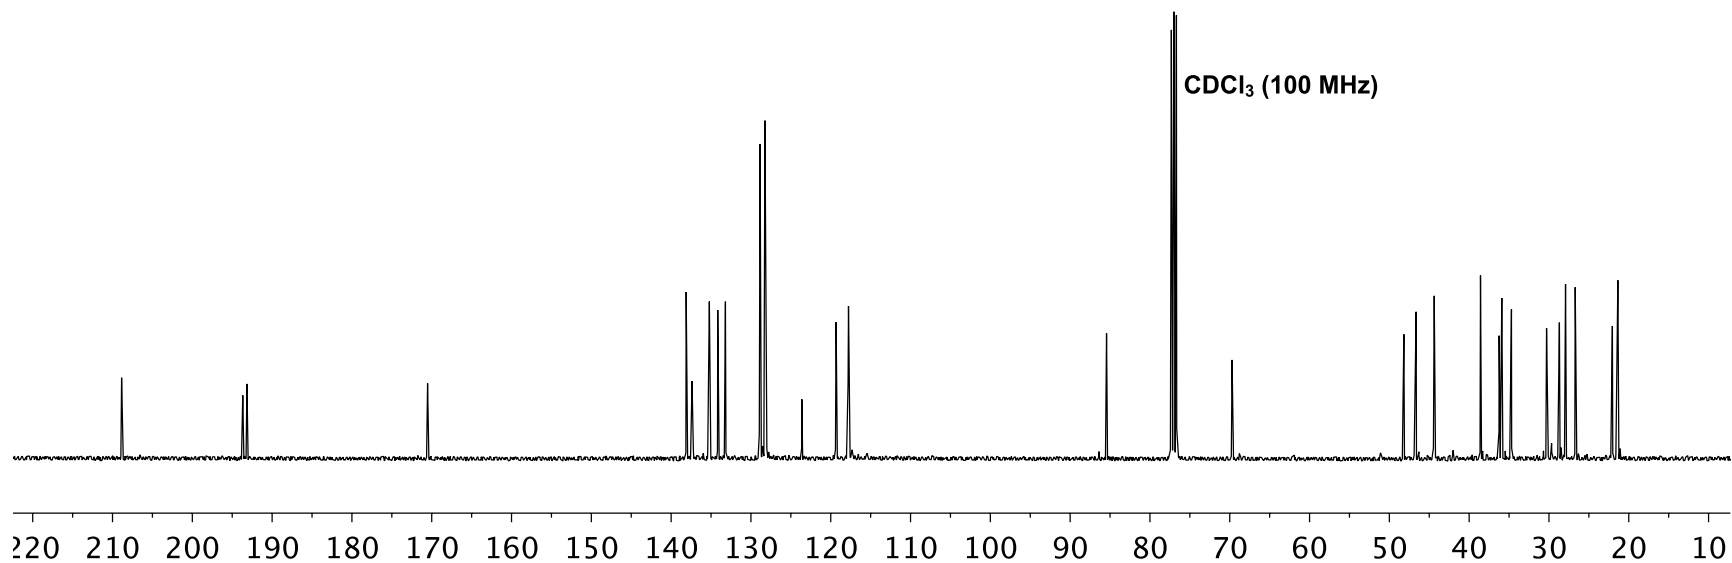

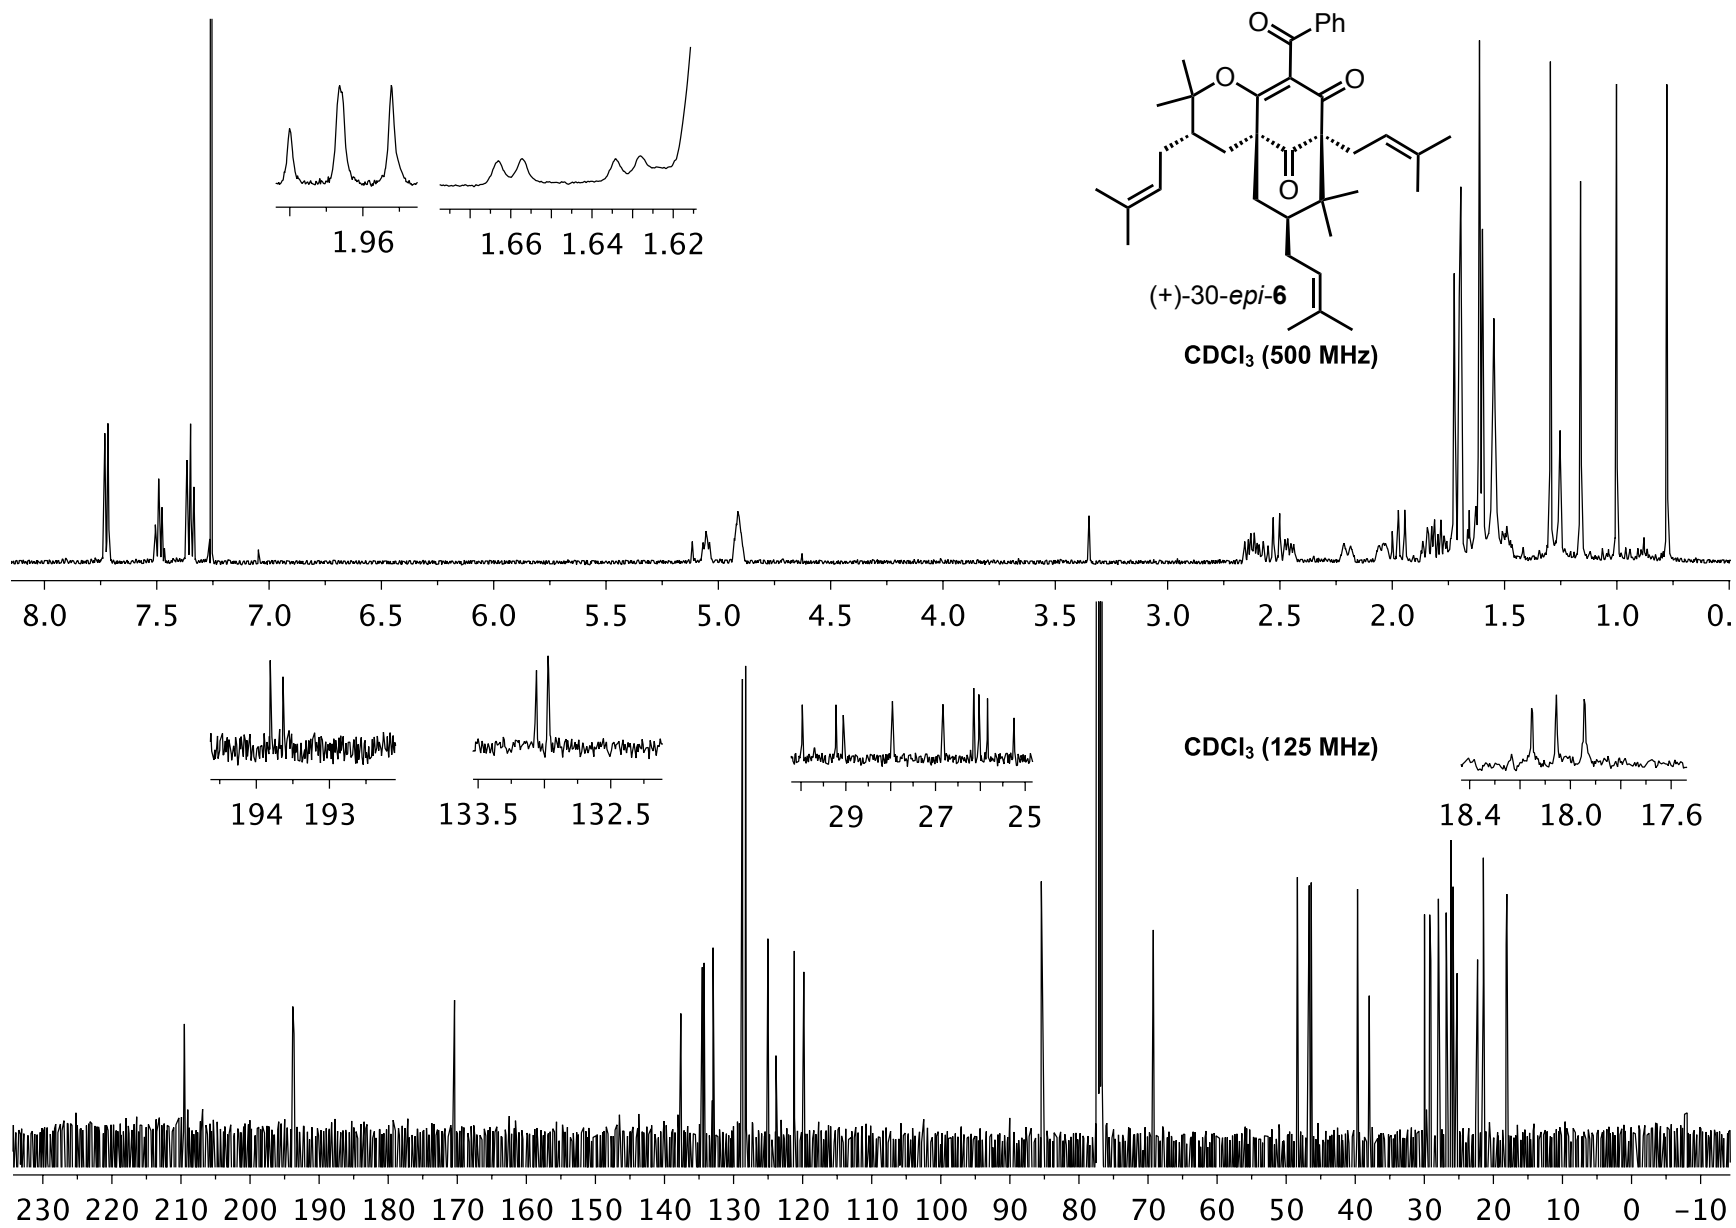

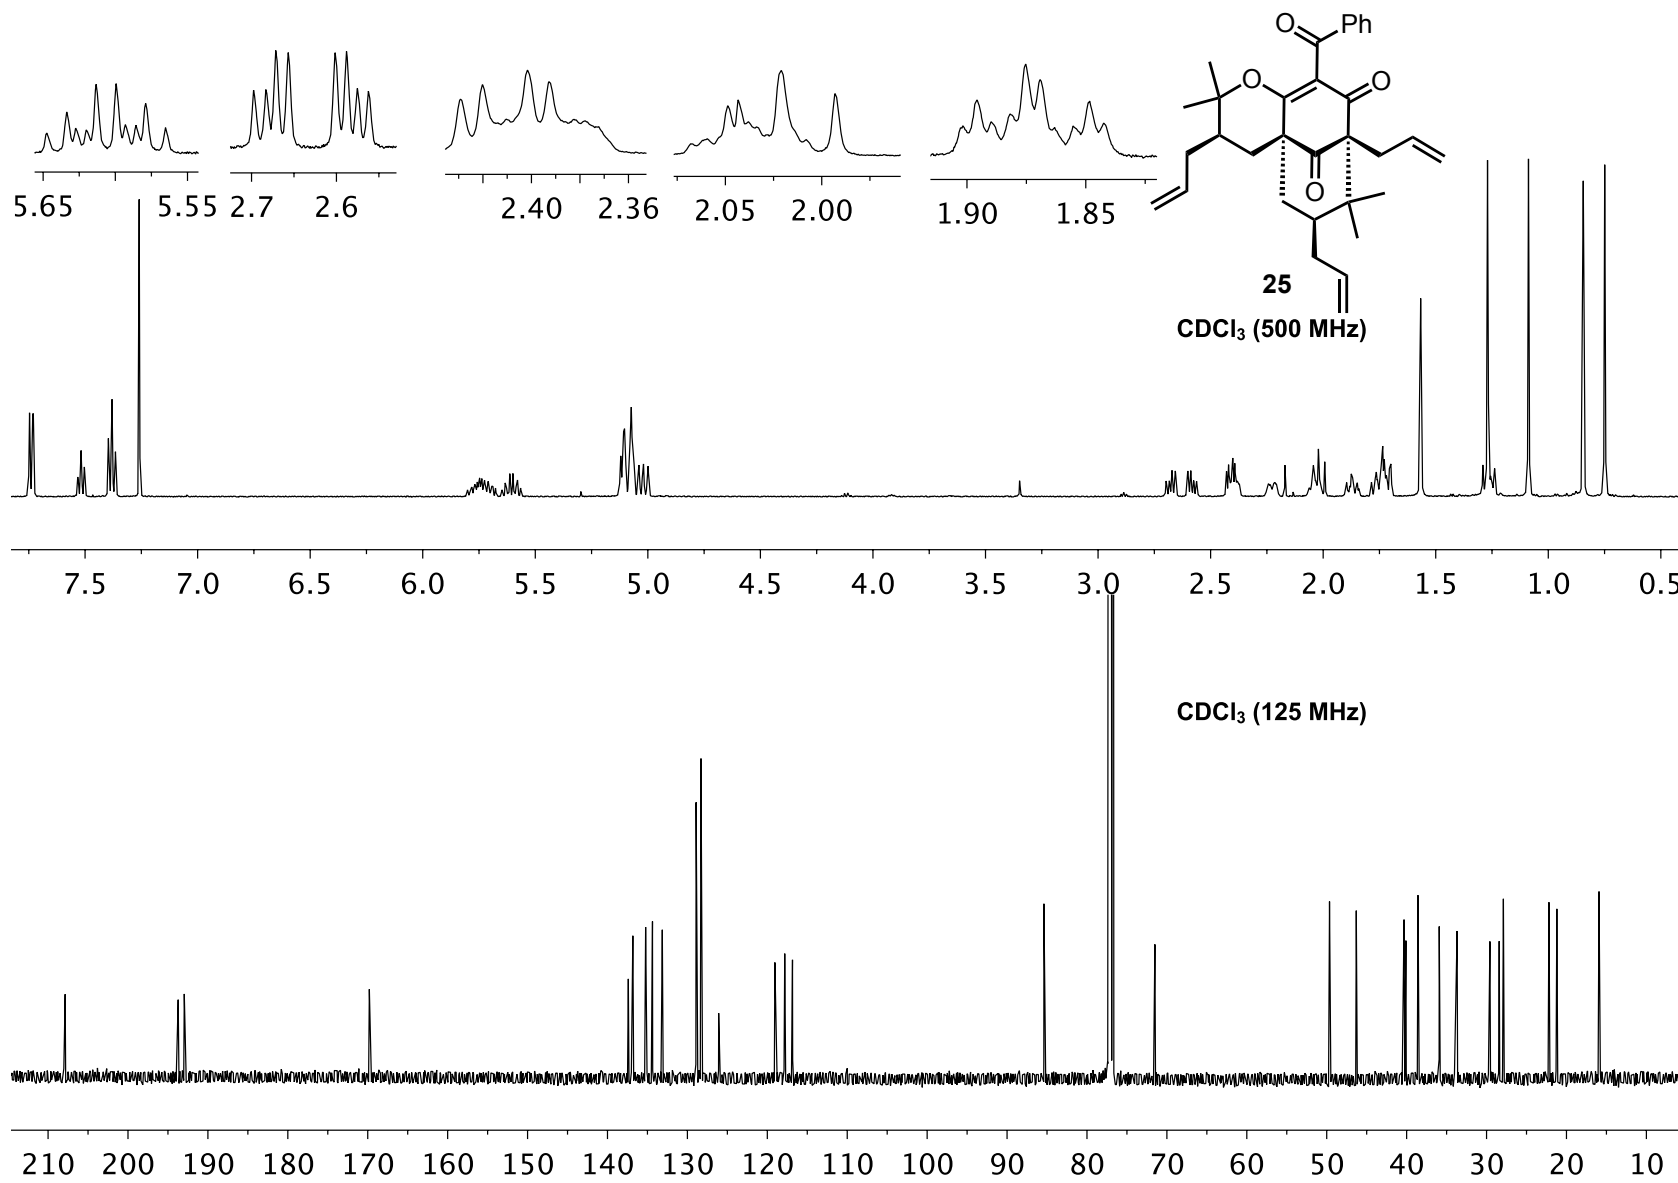



# COSY Correlations for Compound 25

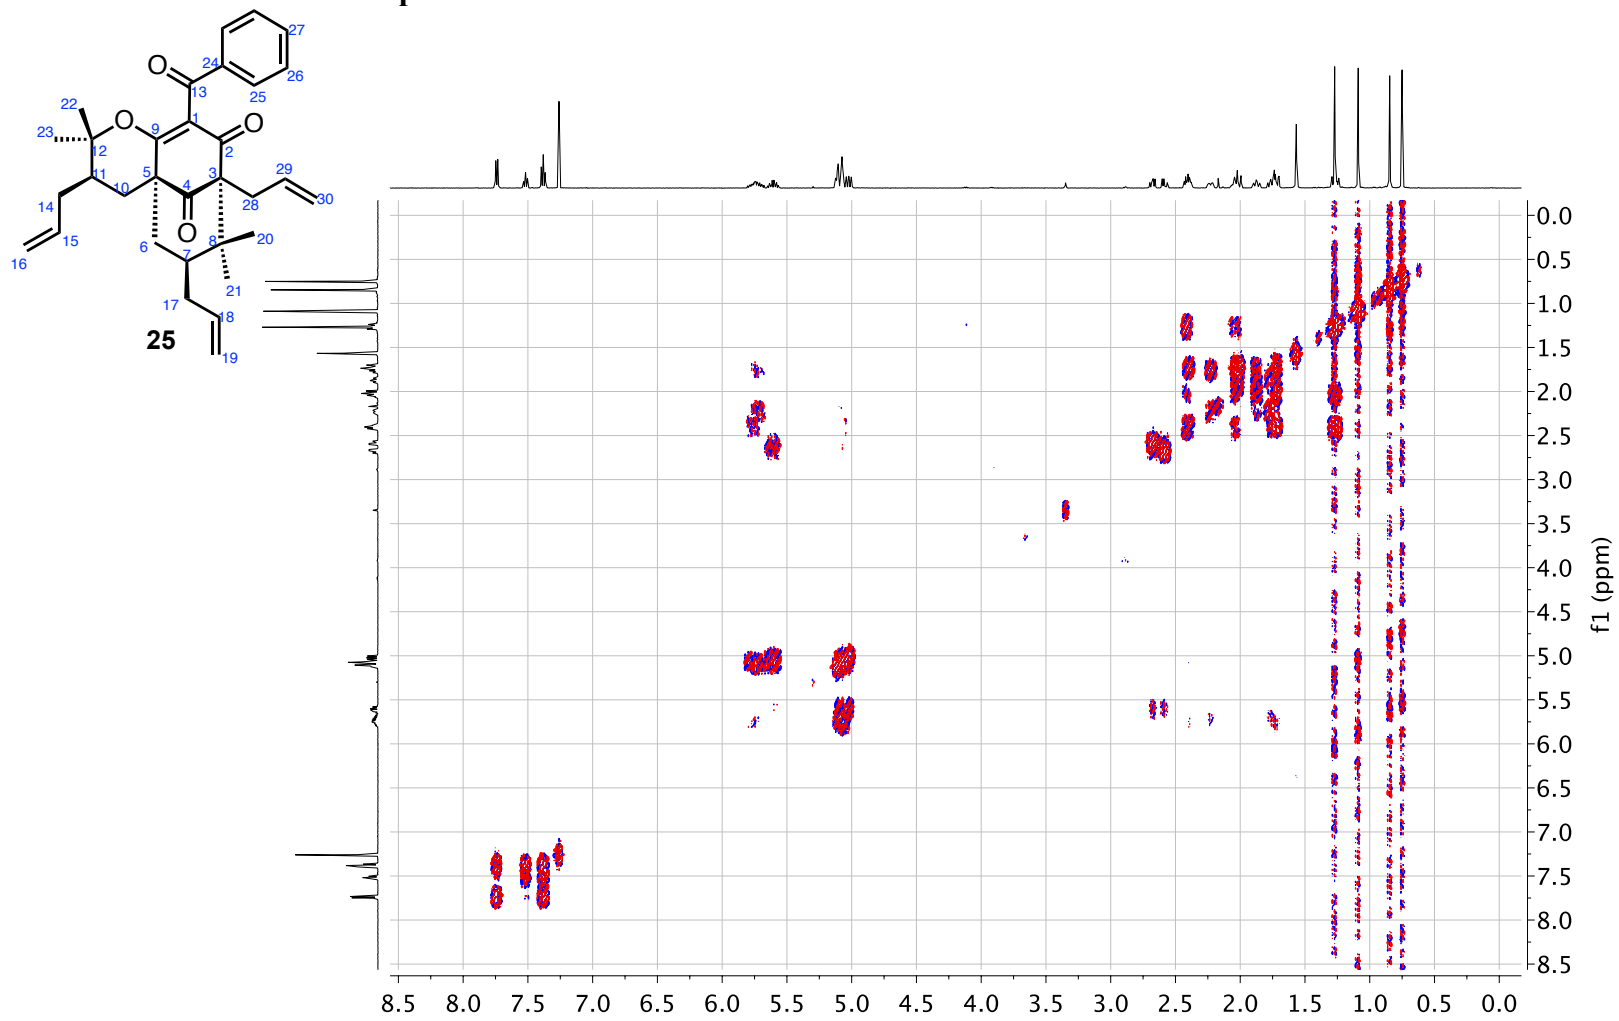

### COSY Correlations (H6'-H7, H11-H10, H14-H11)

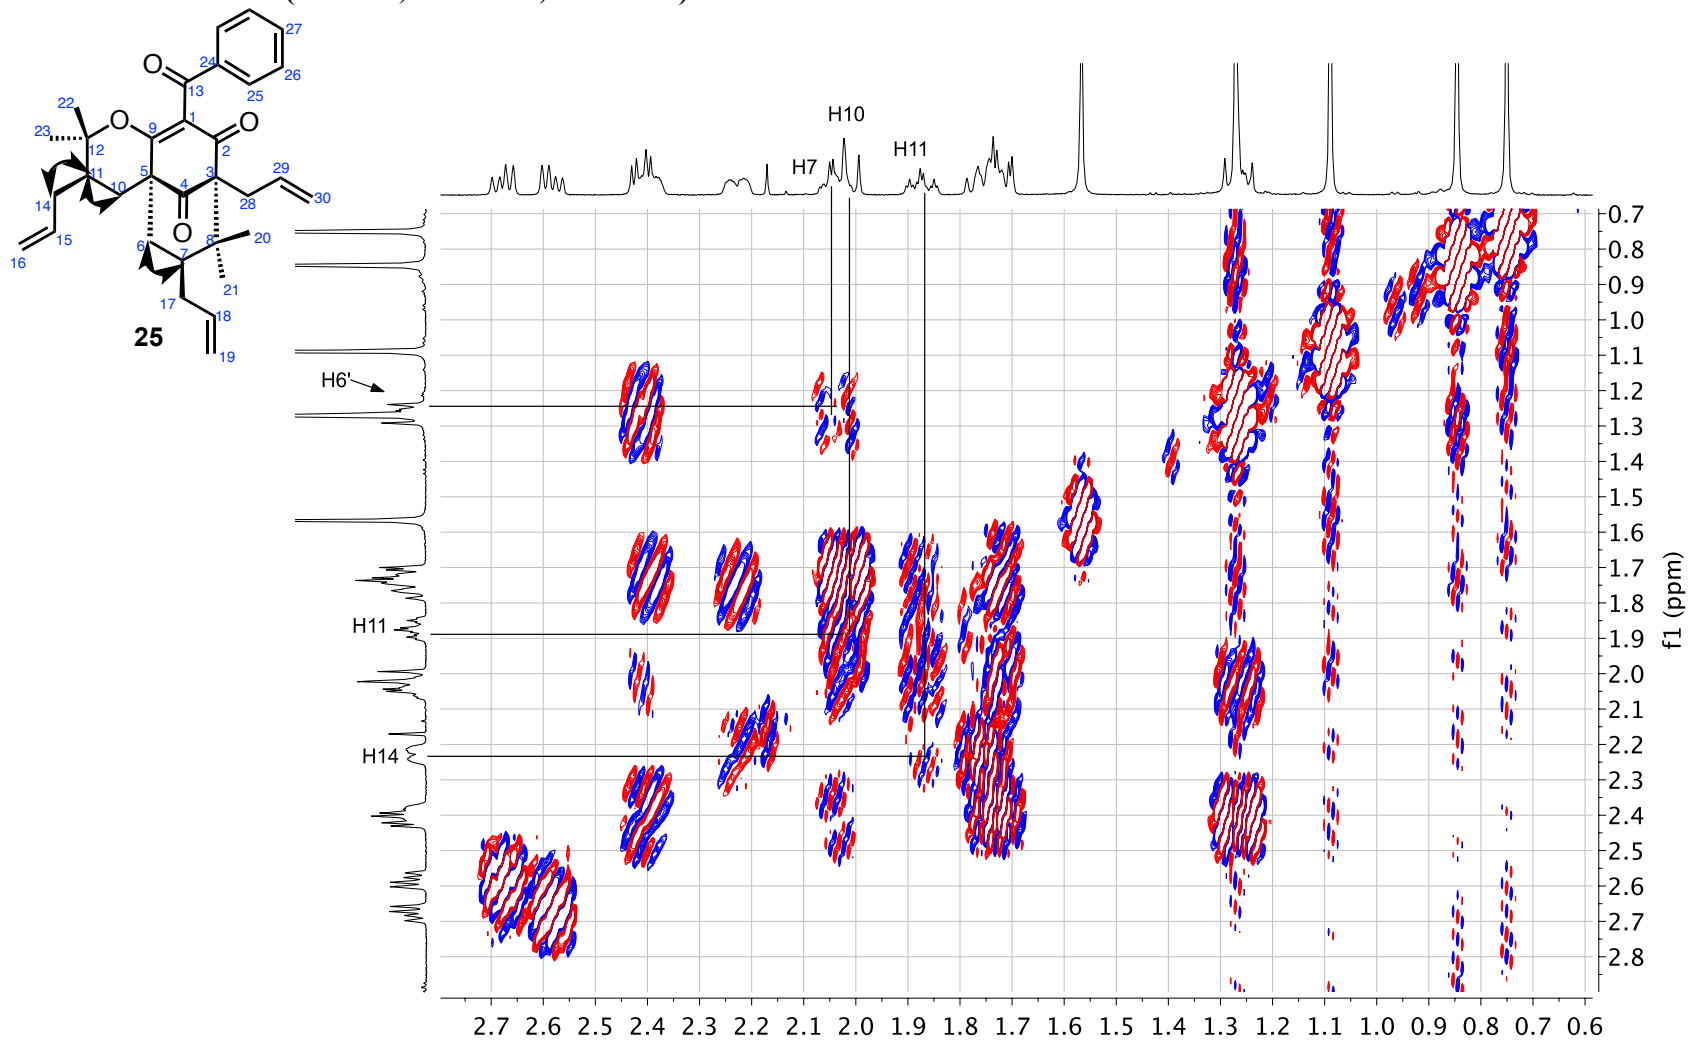

# HSQC Correlations for Compound 25

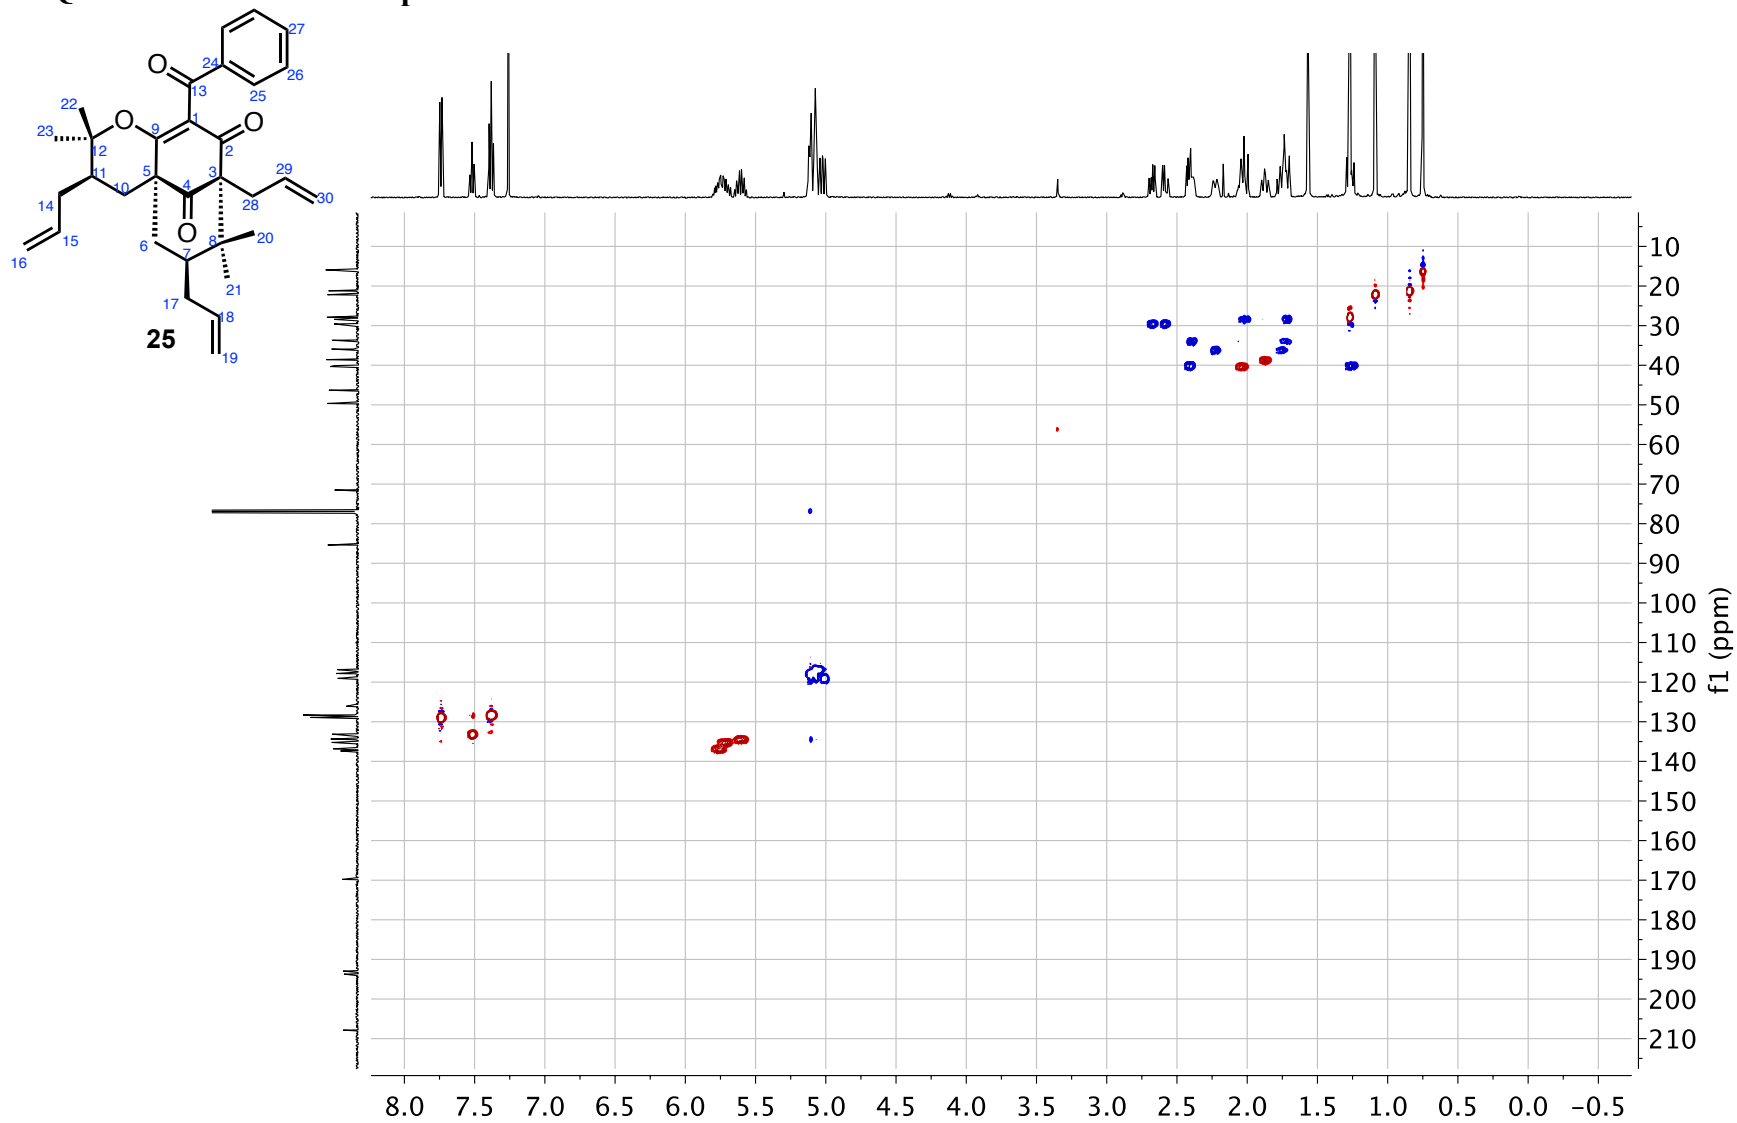

### HSQC Correlations (C7-H7, C11-H11, C14-H14)

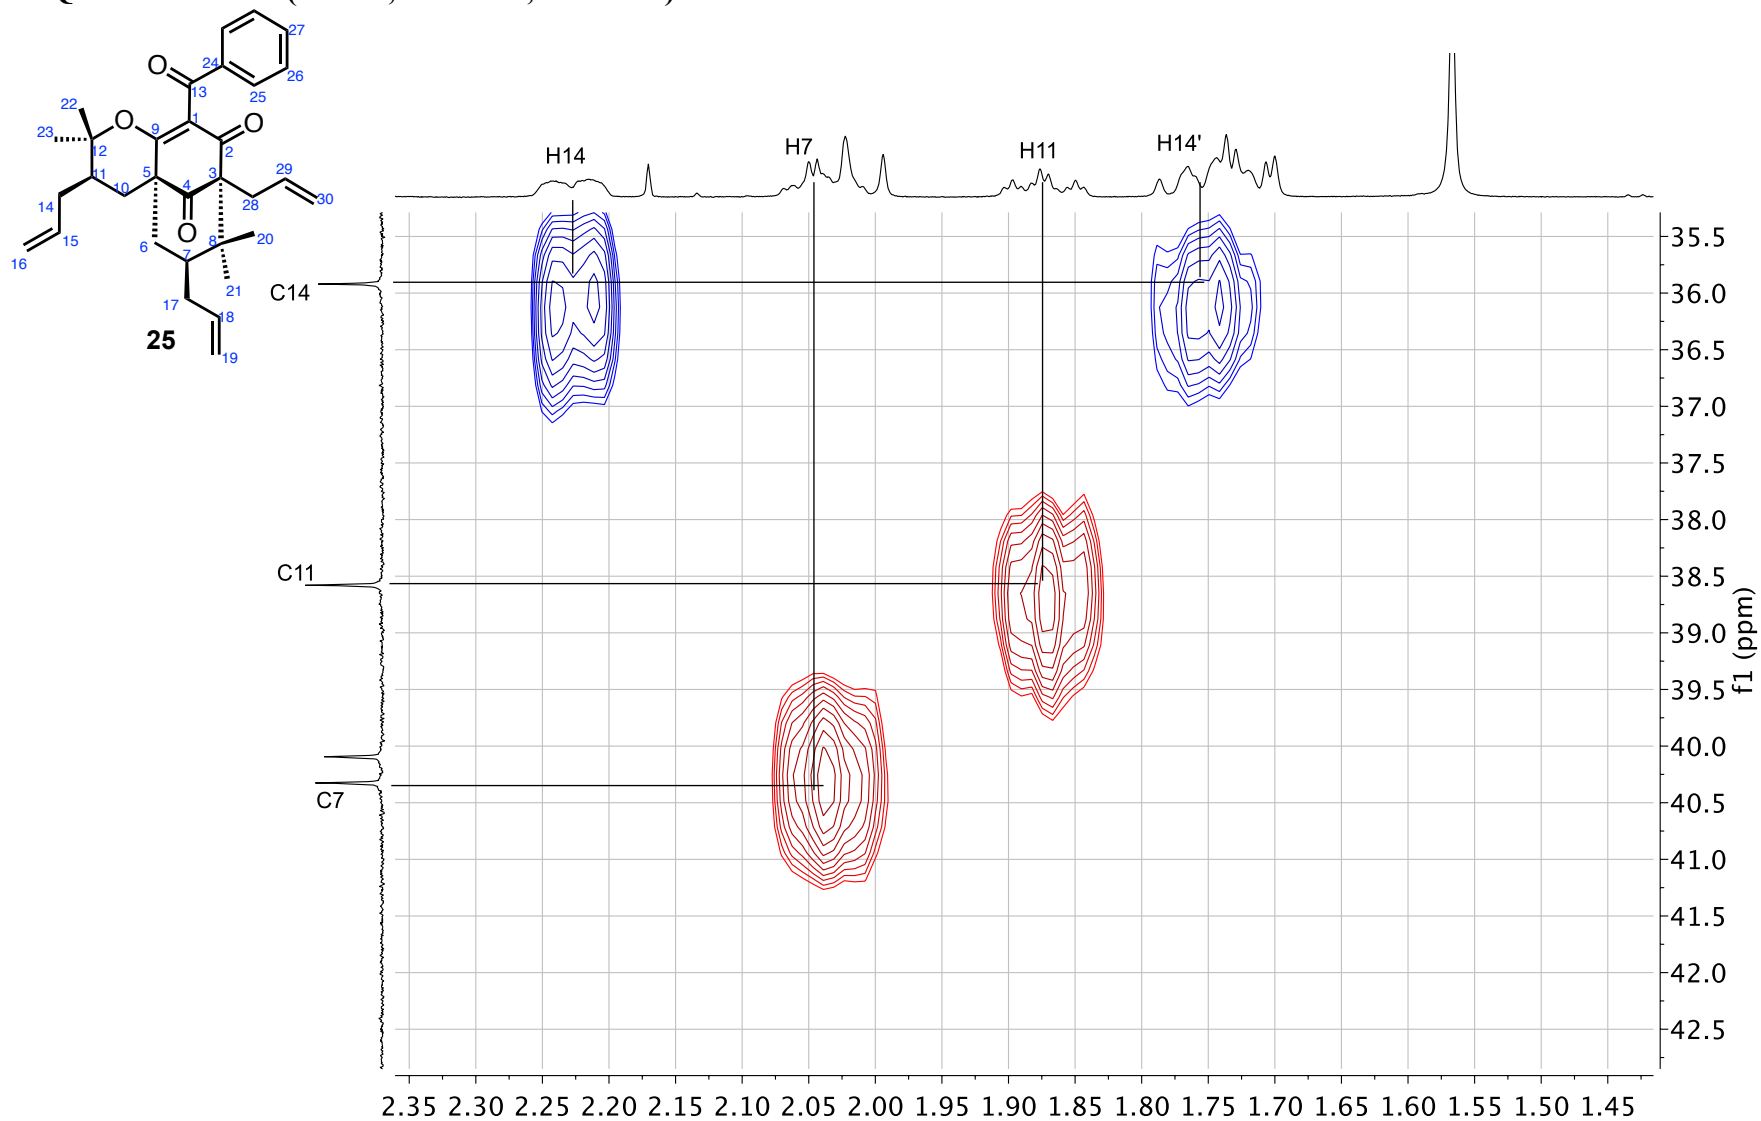

# HMBC Correlations for Compound 25

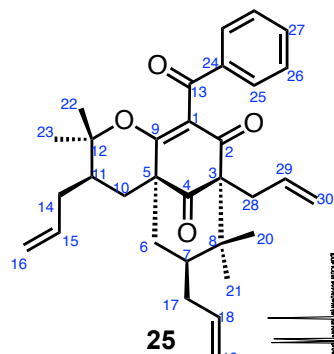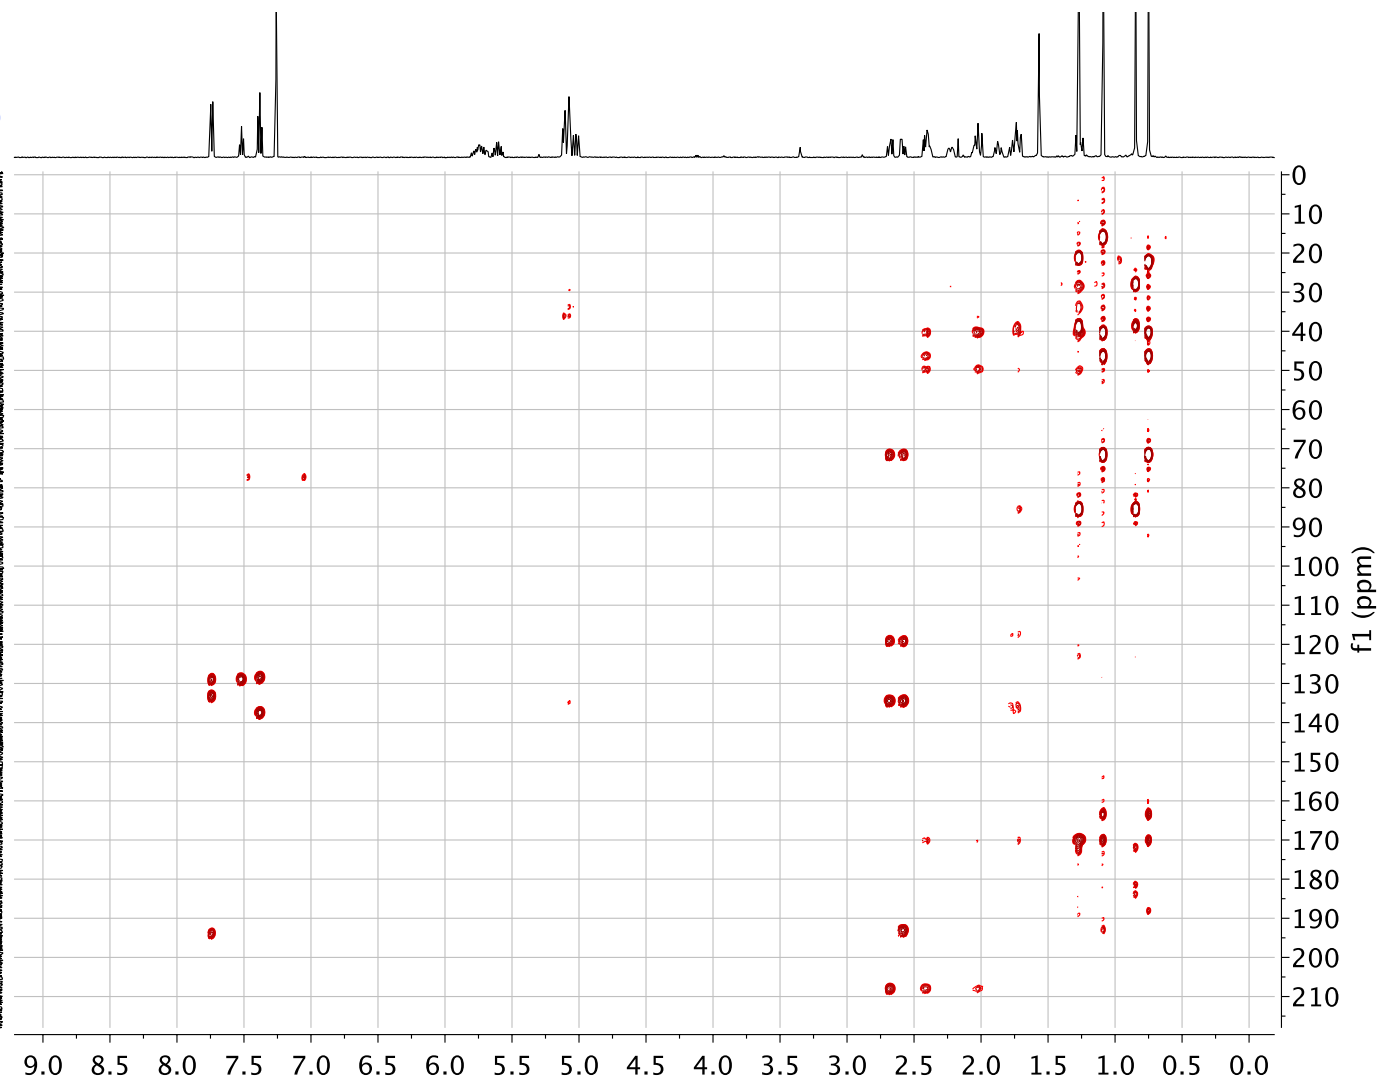

### HMBC Correlations (C11-H23/H22, C7-H21/H20)

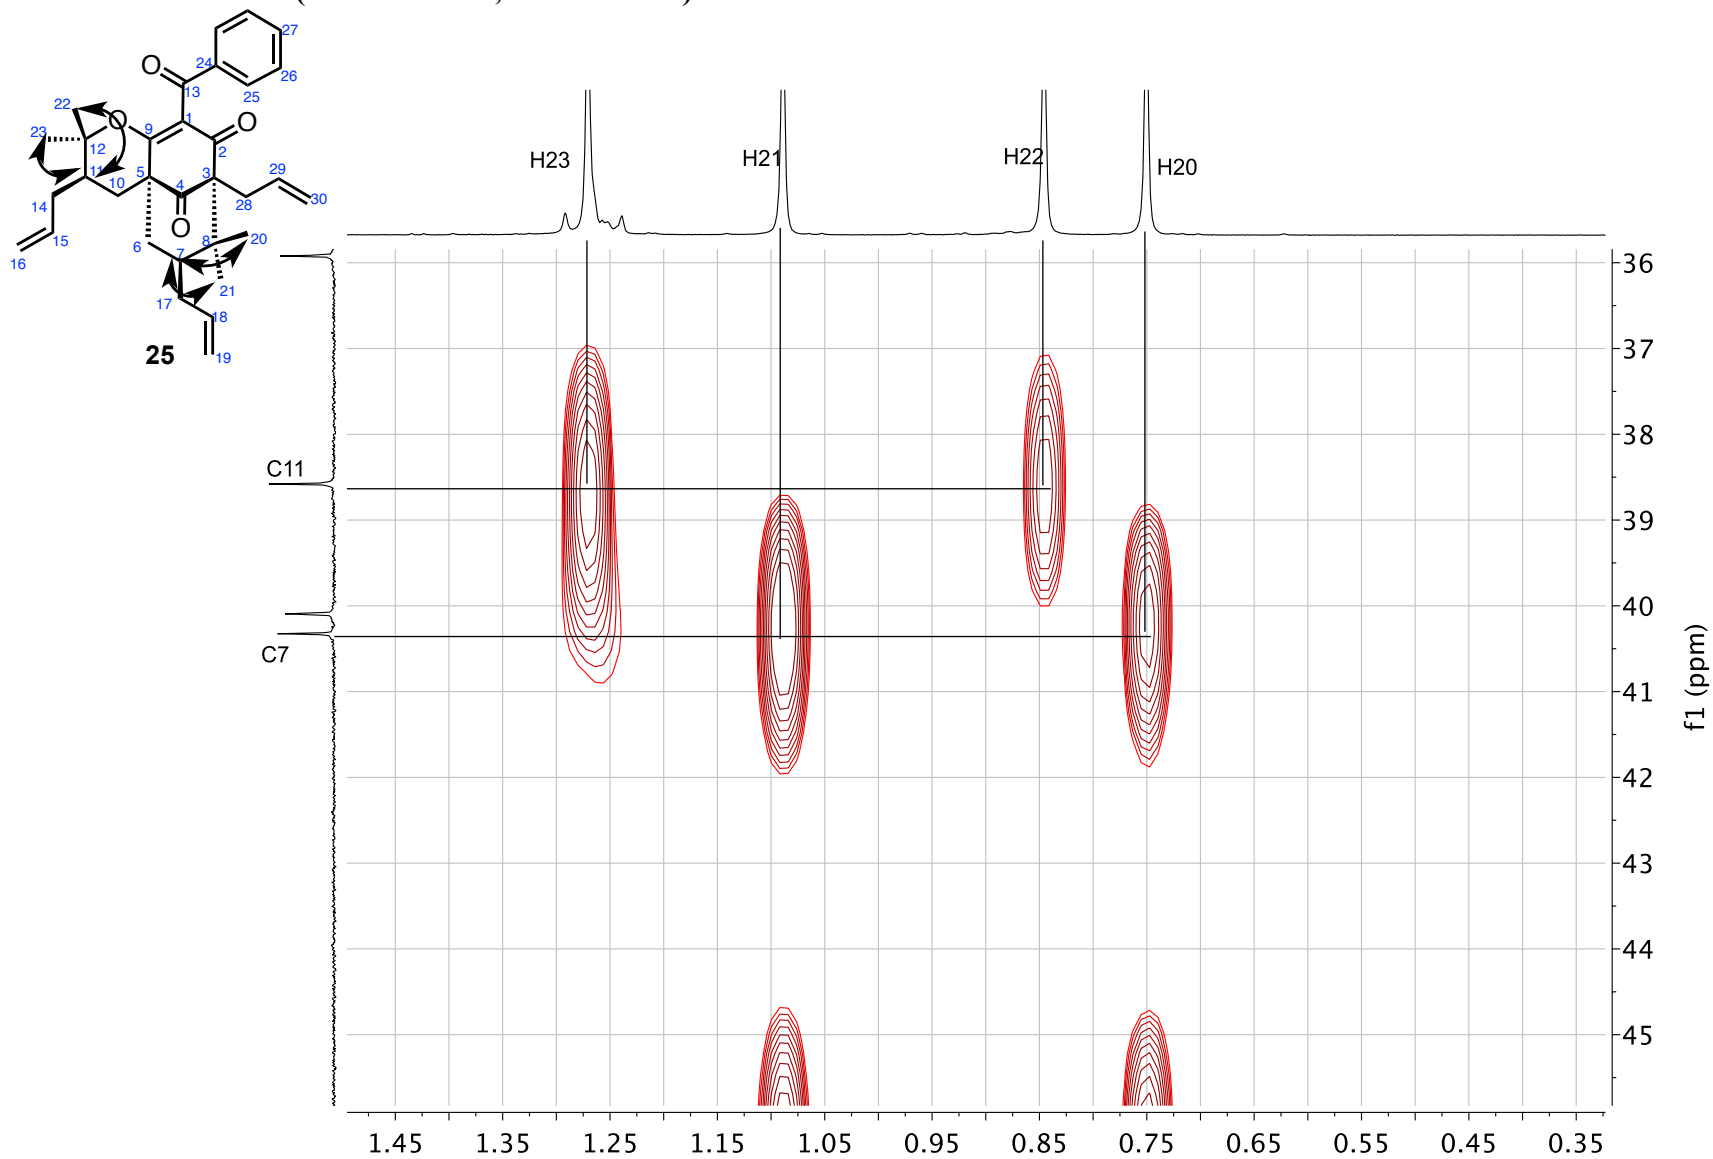

### HMBC Correlations (C8-H20/H21, C3-H20/H21, C12-H23/H22)

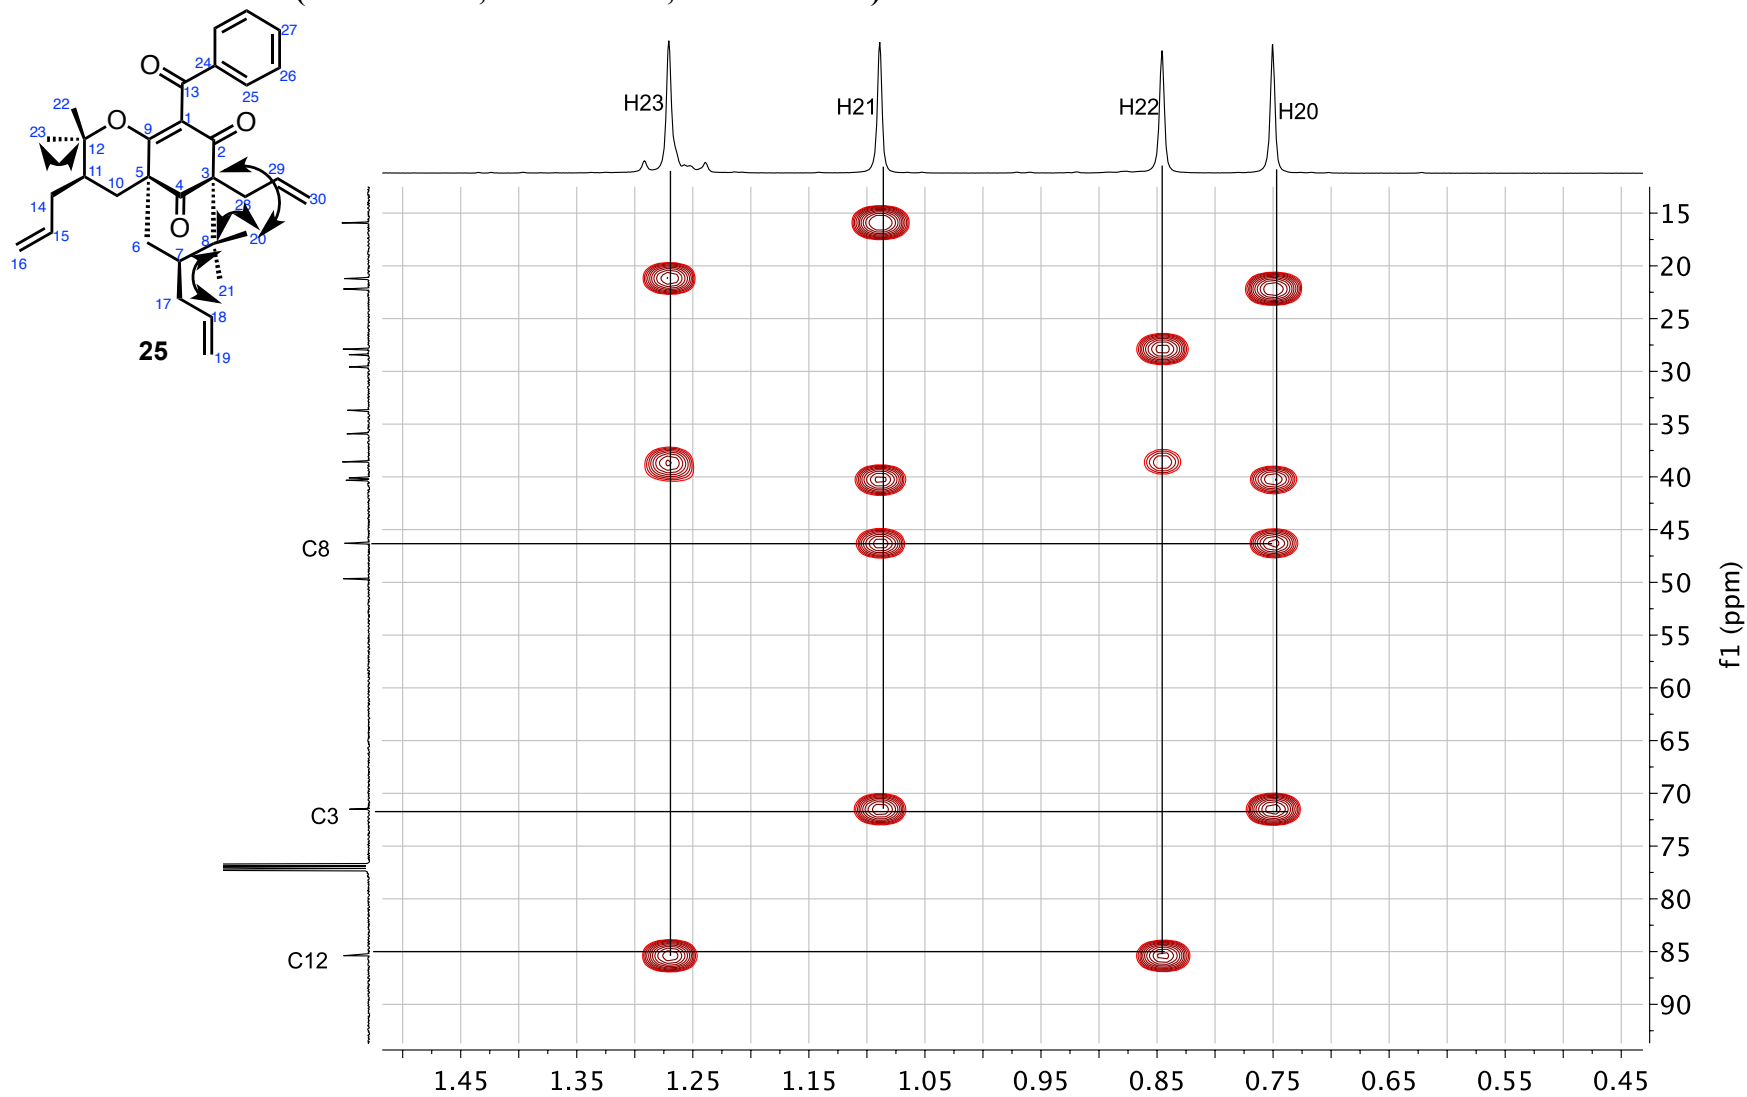

# NOESY Correlations for Compound 25

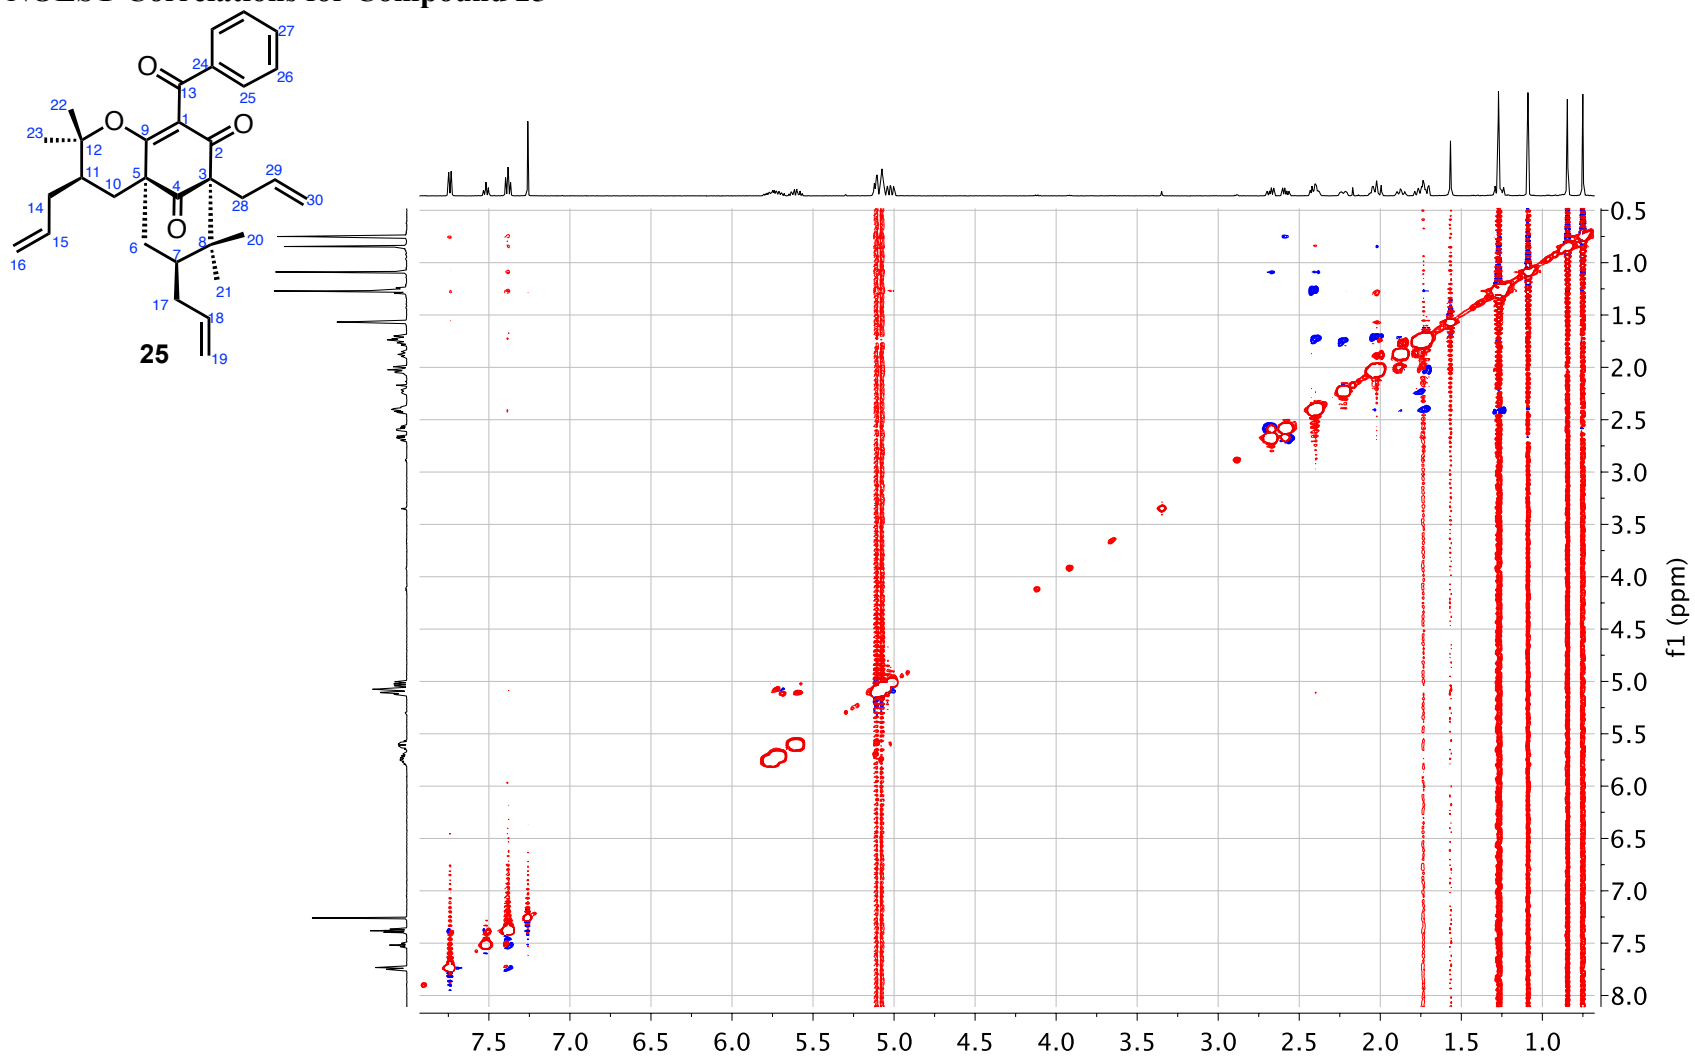



**NOESY Correlations (H20-H28', H22-H10, H21-H28, H21-H17, H21-H7 (indicates orientation of H21), H23-H14, H23-H11 (indicates orientation of H23))**

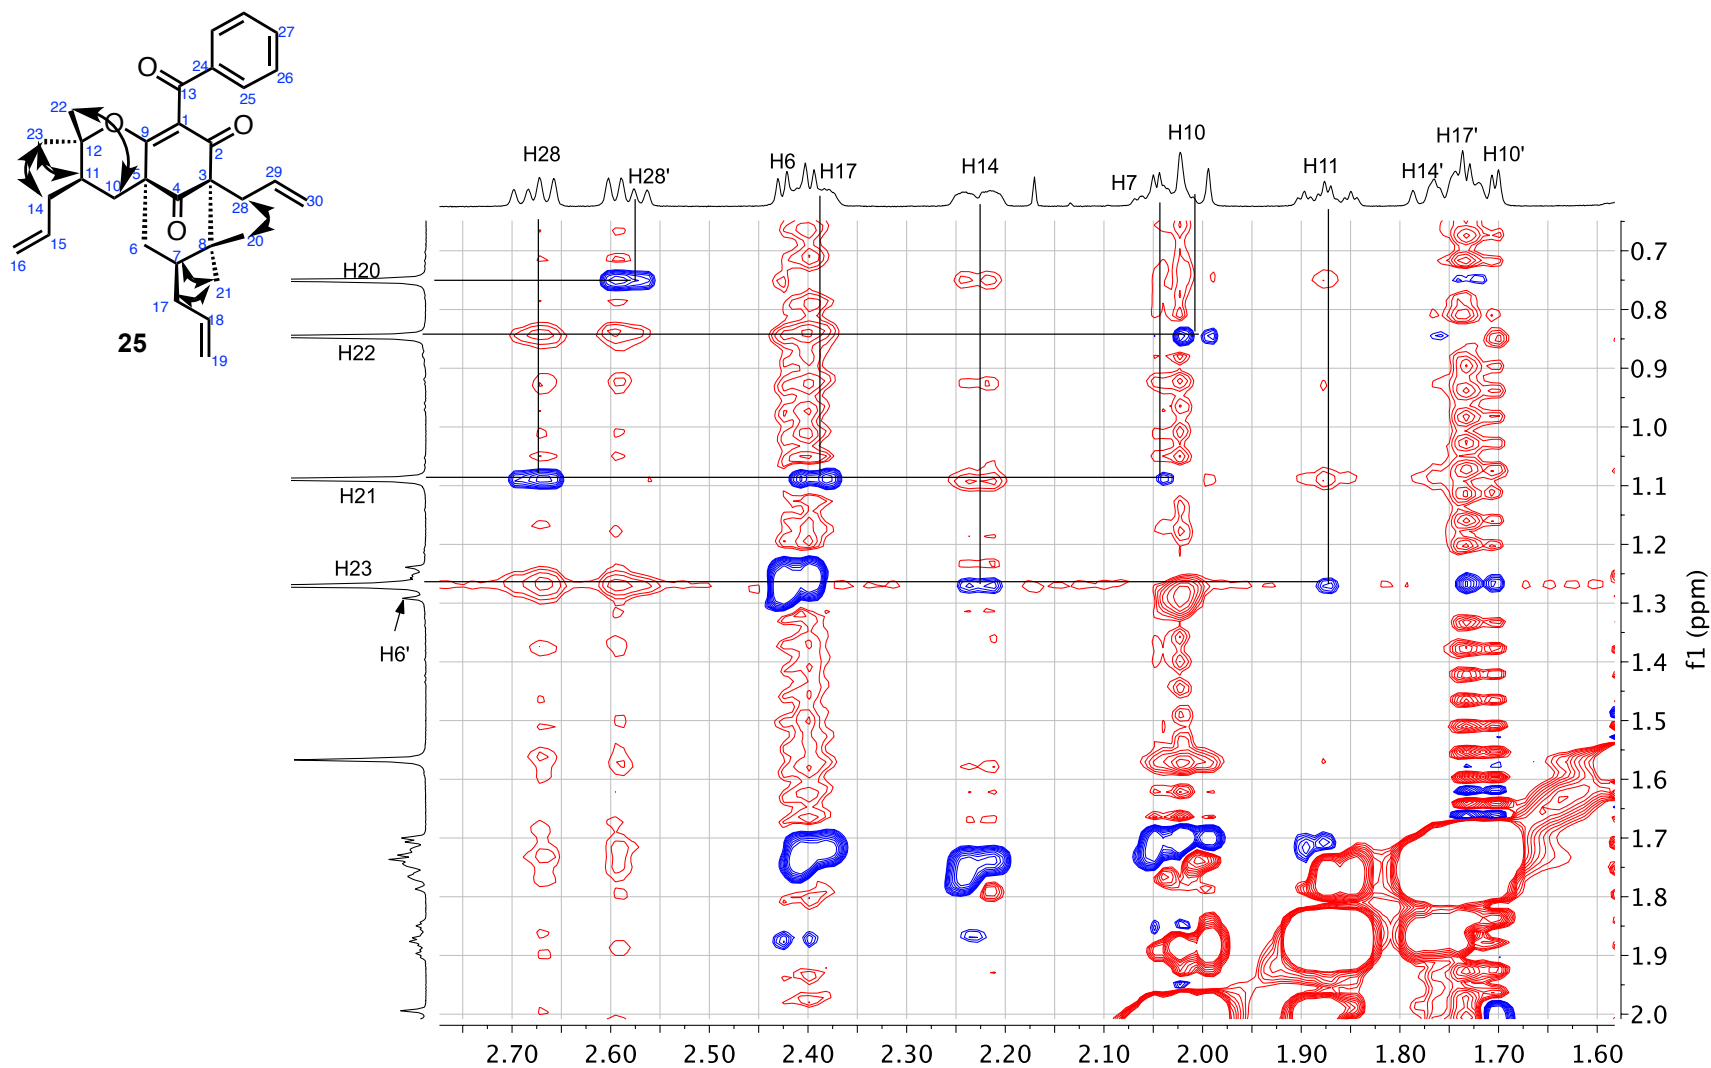

### NOESY Correlations (H6-H11 Diagnostic NOE)

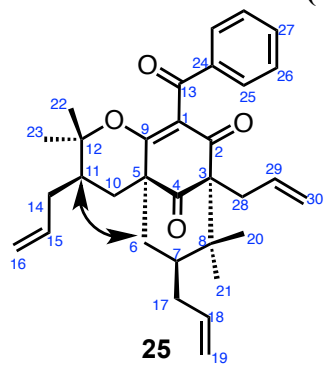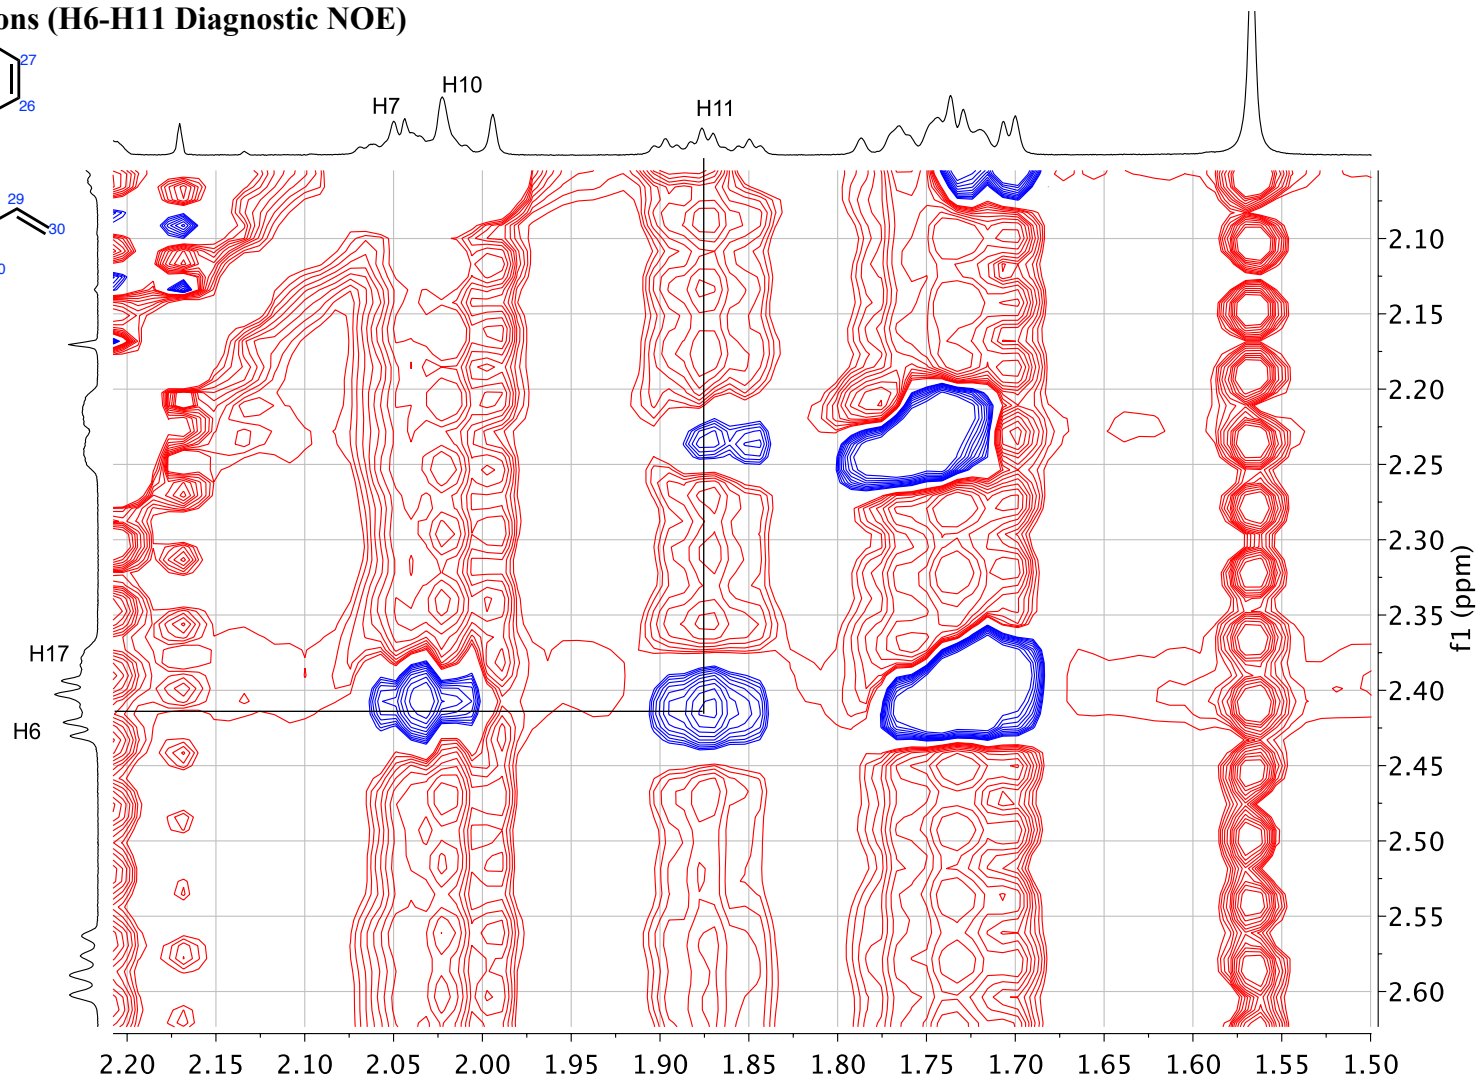

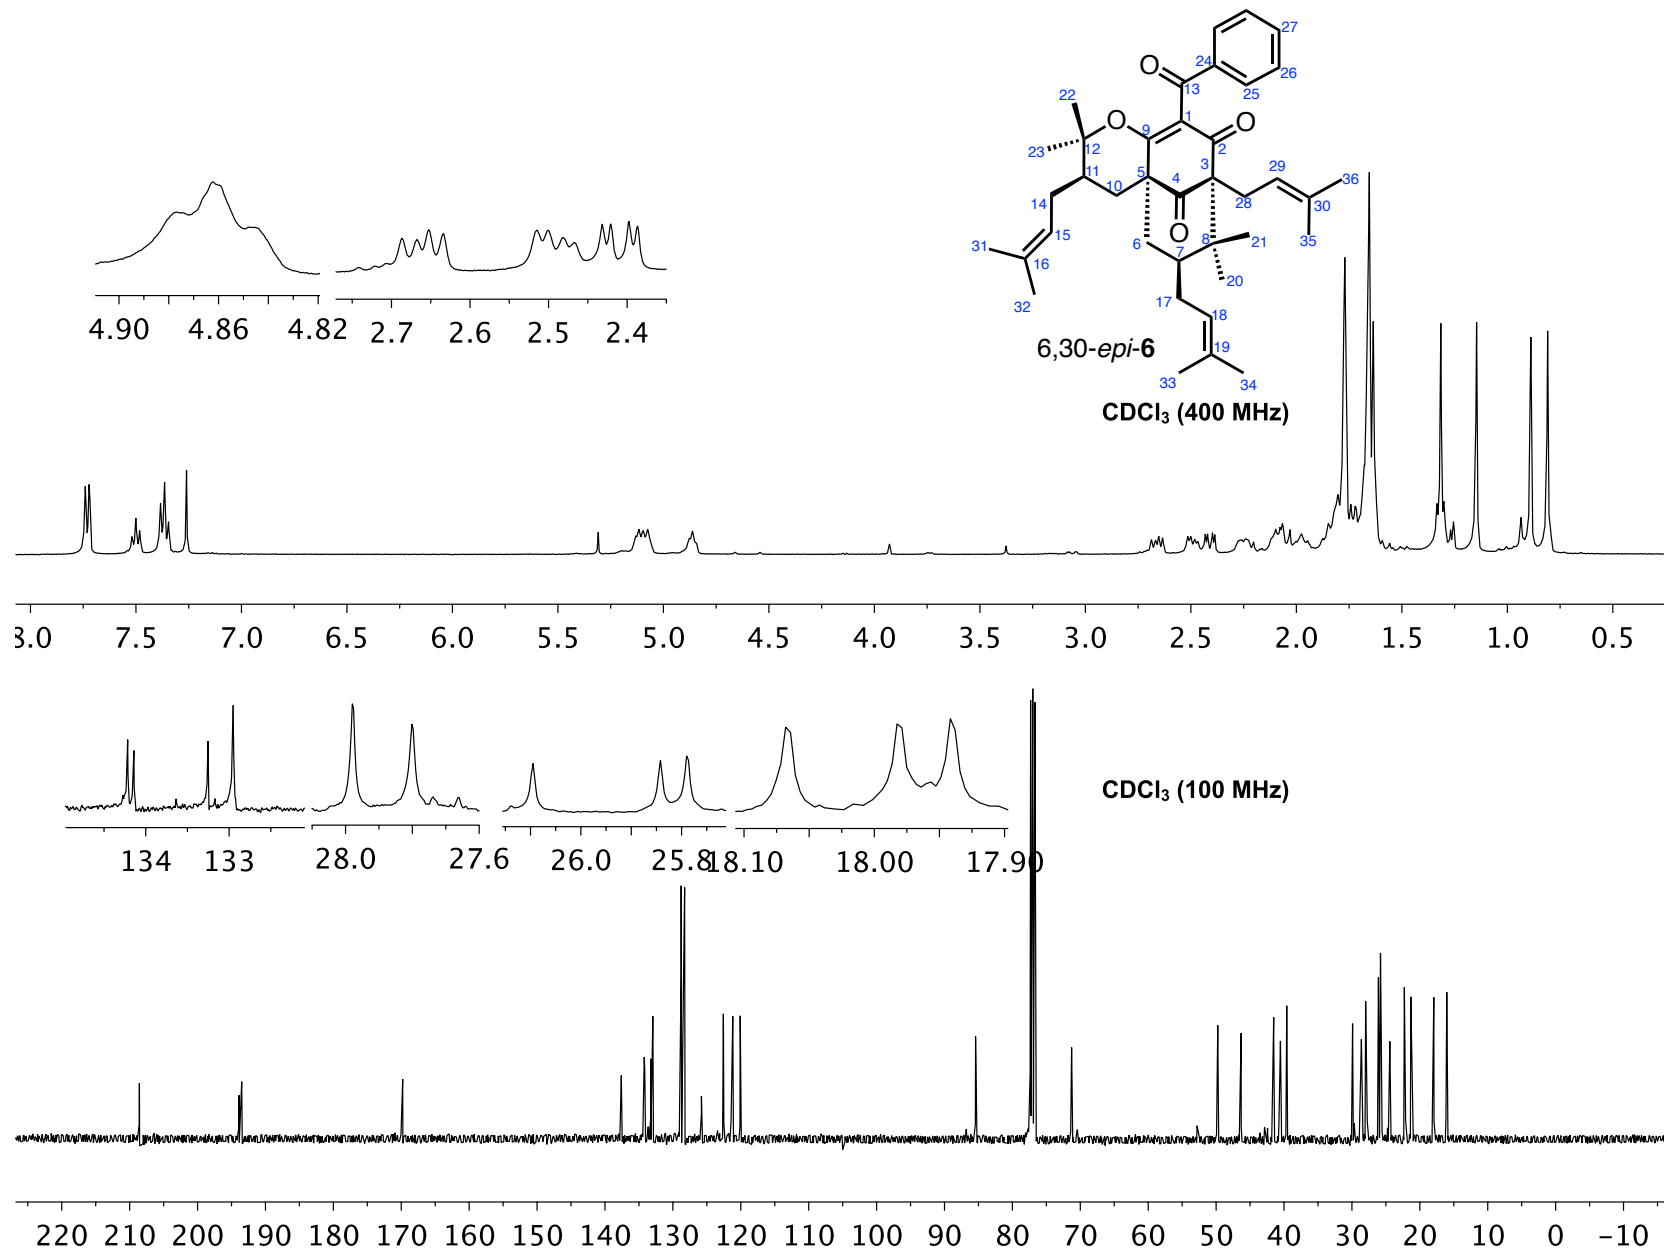

# COSY Correlations for Compound 6,30-*epi*-6

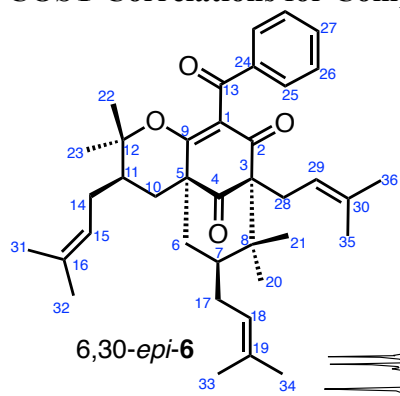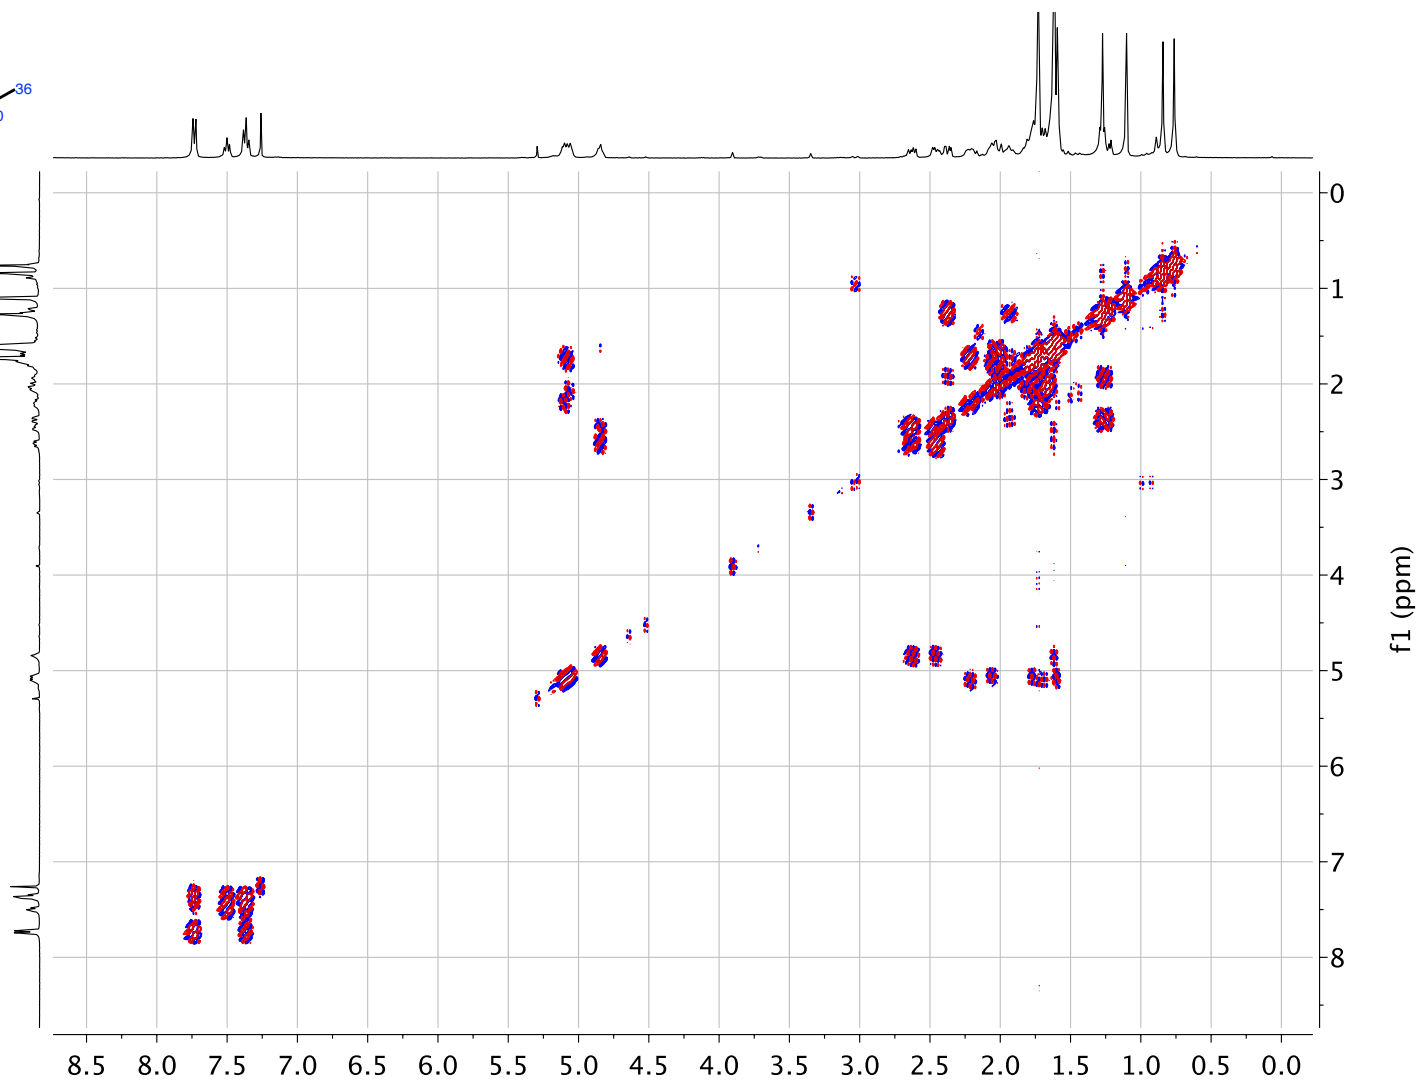

**COSY Correlations (H14'/H17'-H15/H18, H14-H15, H17-H18, H28-H29, H28'-H29)**

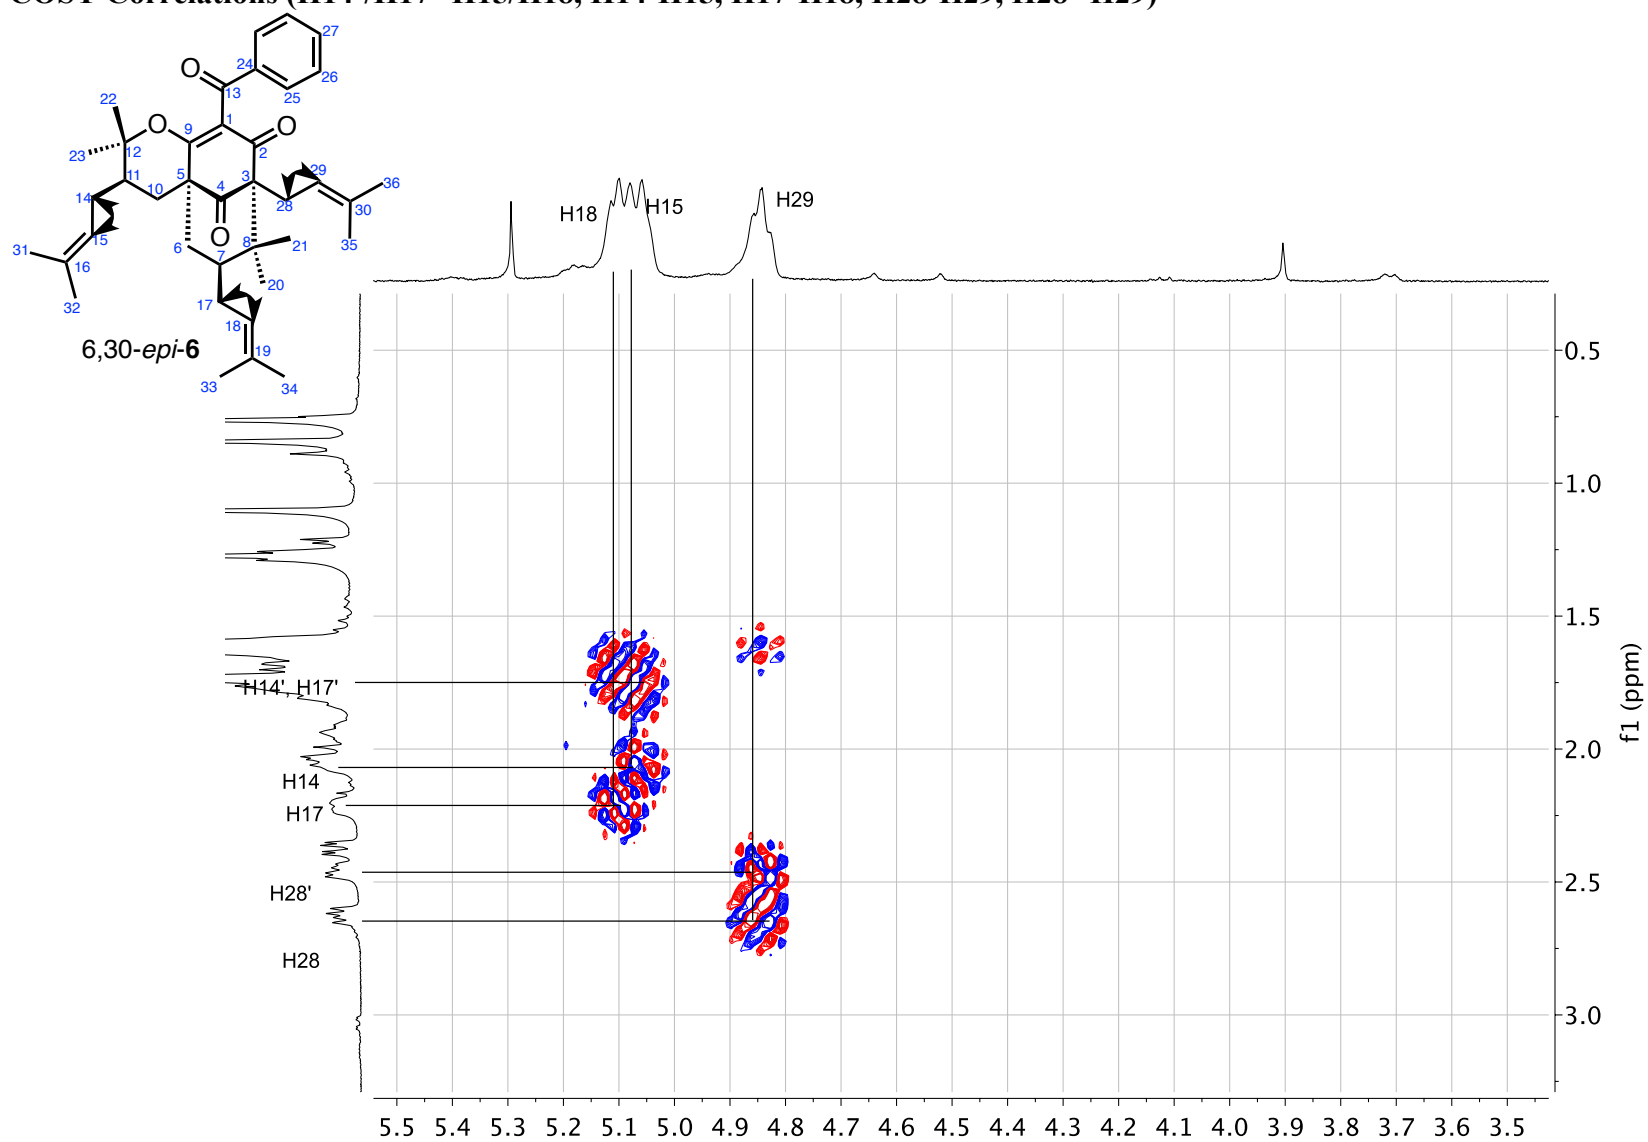

### COSY Correlations (H6'-H7, H6-H7)

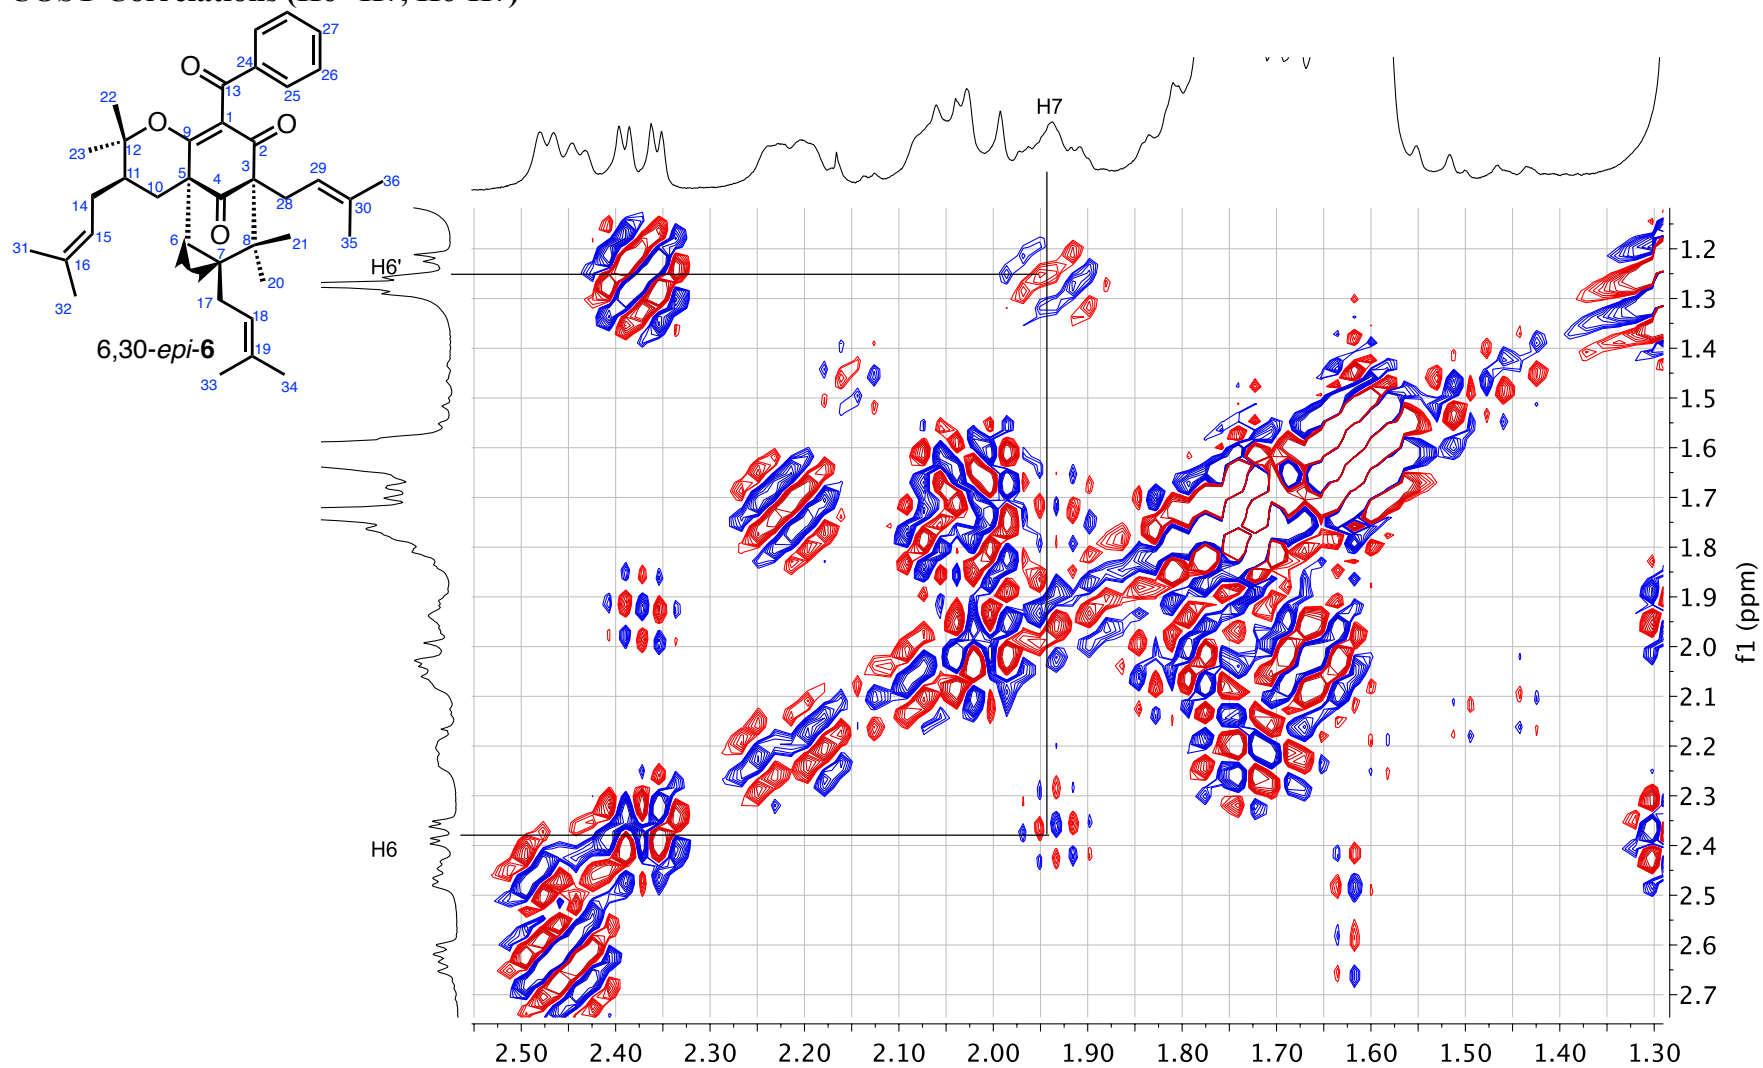

### HSQC Correlations for Compound 6,30-*epi*-6

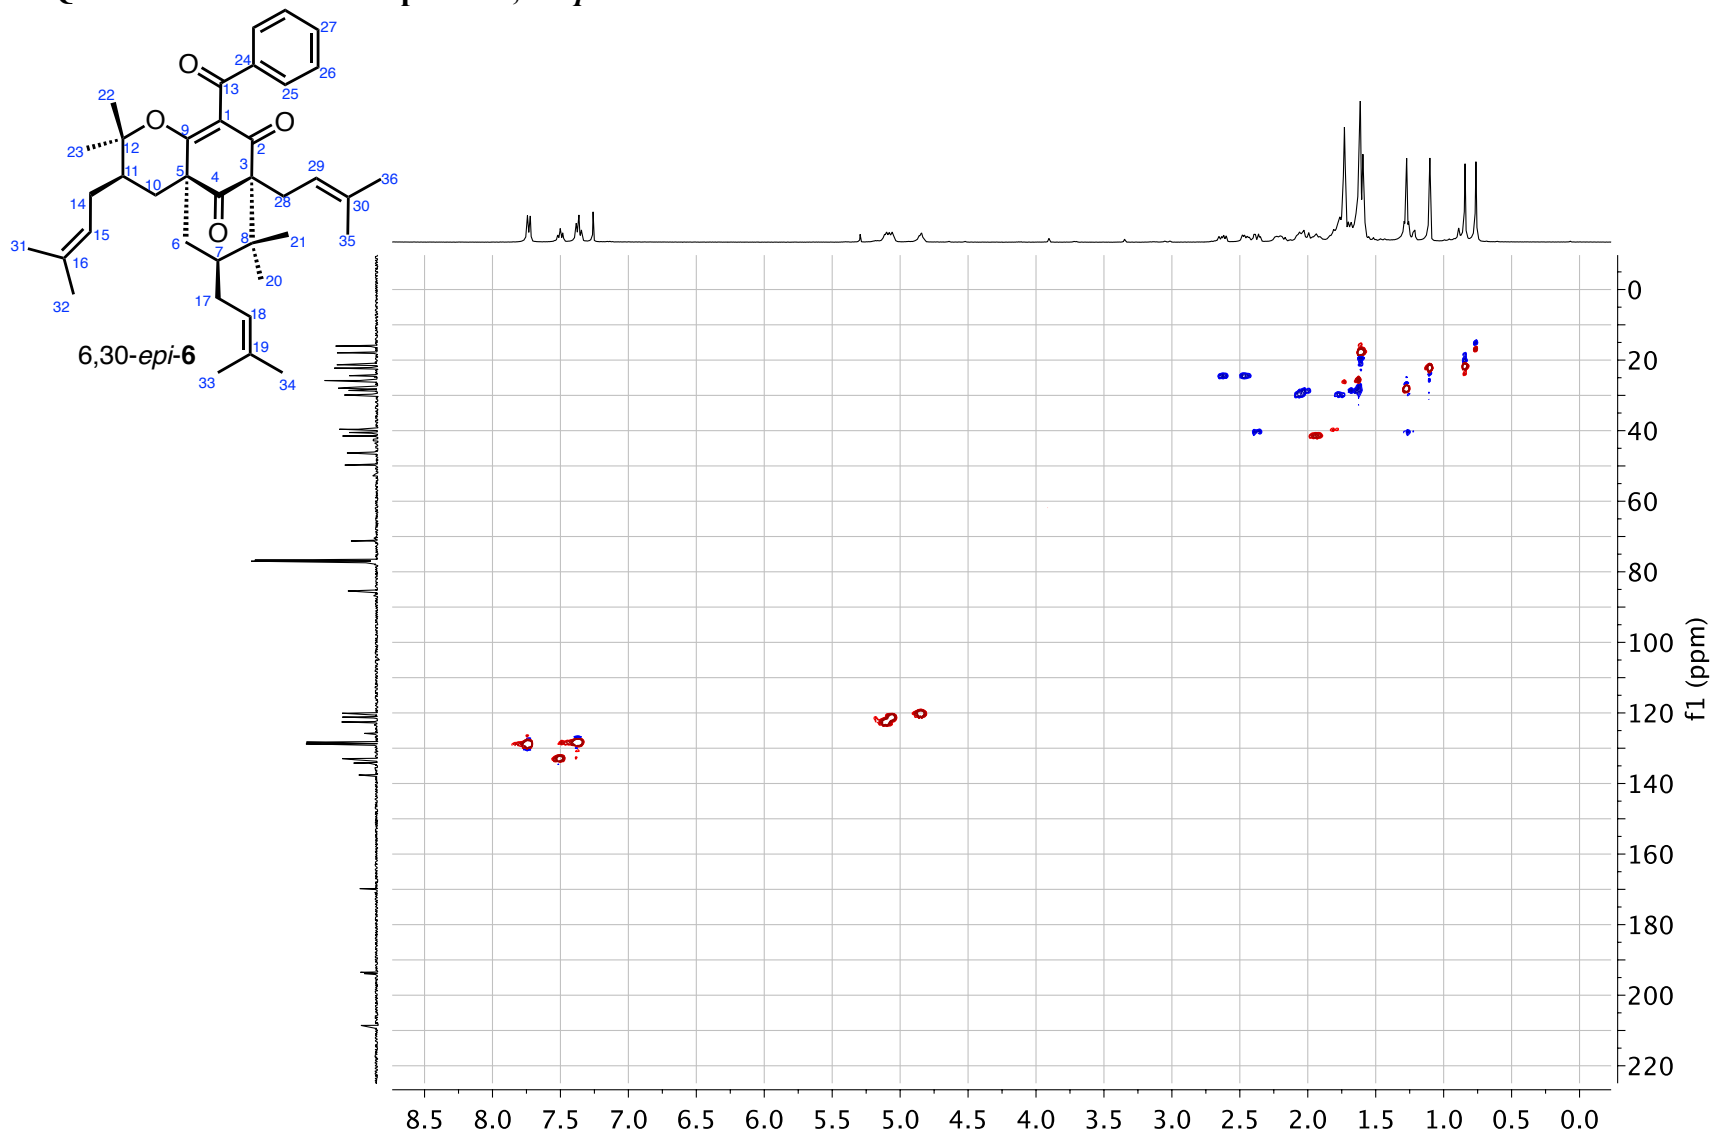

# HSQC Correlations (C11-H11, C6-H6/H6', C7-H7)

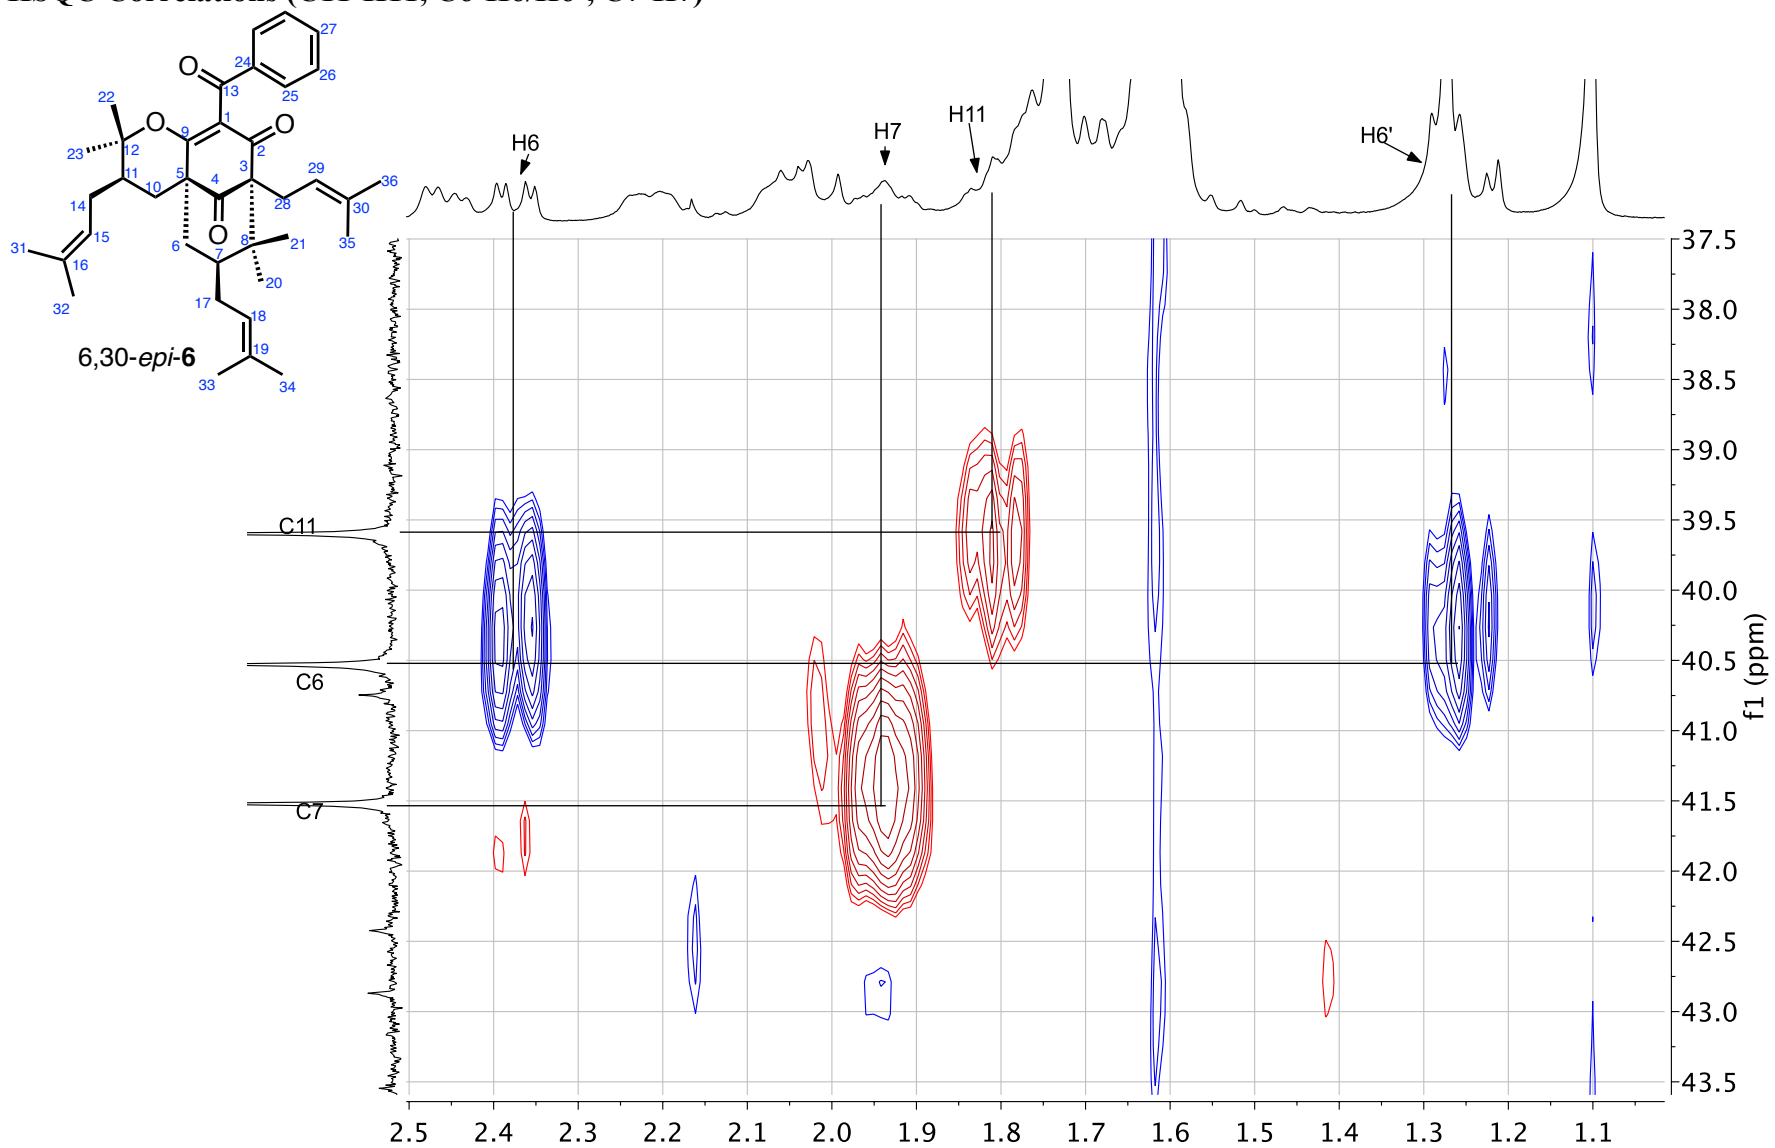



# HMBC Correlations for Compound 6,30-*epi*-6

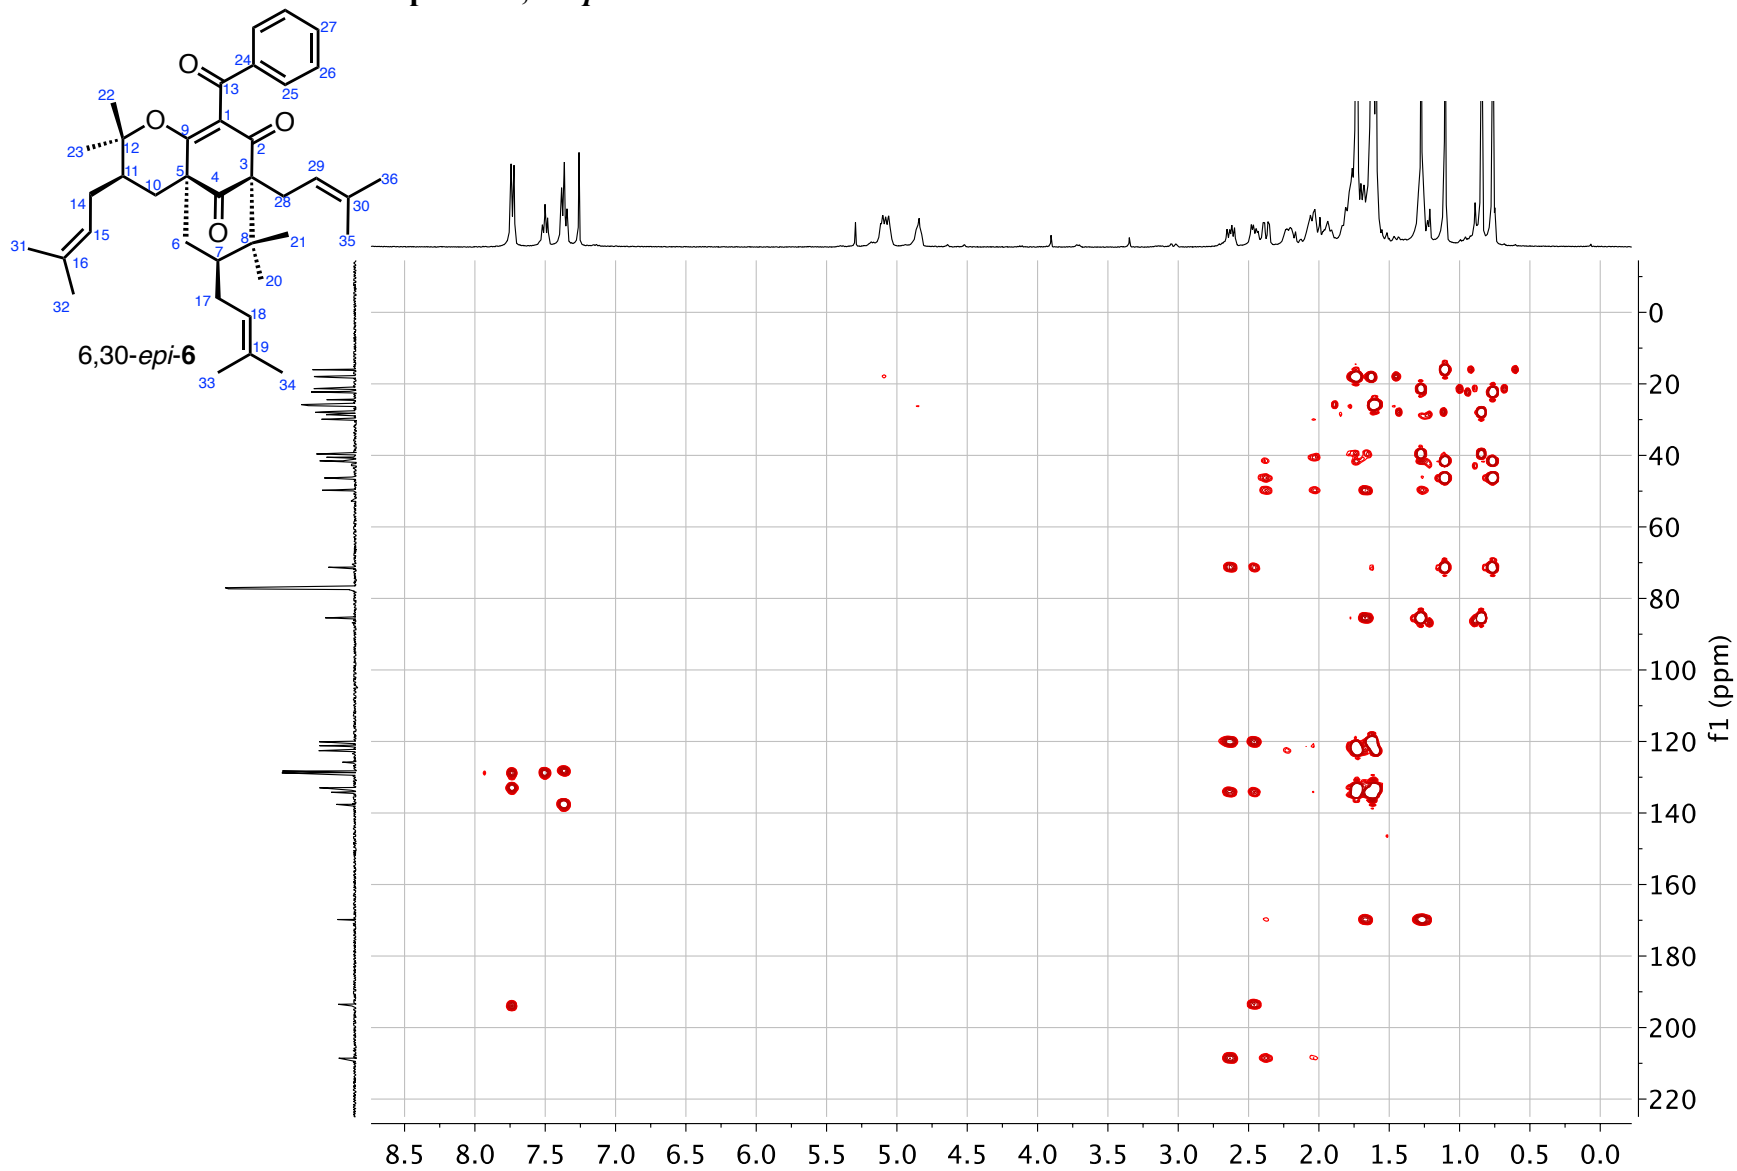

**HMBC Correlations (C11-H14', C11-H10', C11-H23, C11-H22, C7-H17', C7-H6', C7-H21, C7-H20, C8-H21, C8-H20, C5-H10', C5-H6', C3-H21, C3-H20, C12-H10', C12-H23, C12-H22)**

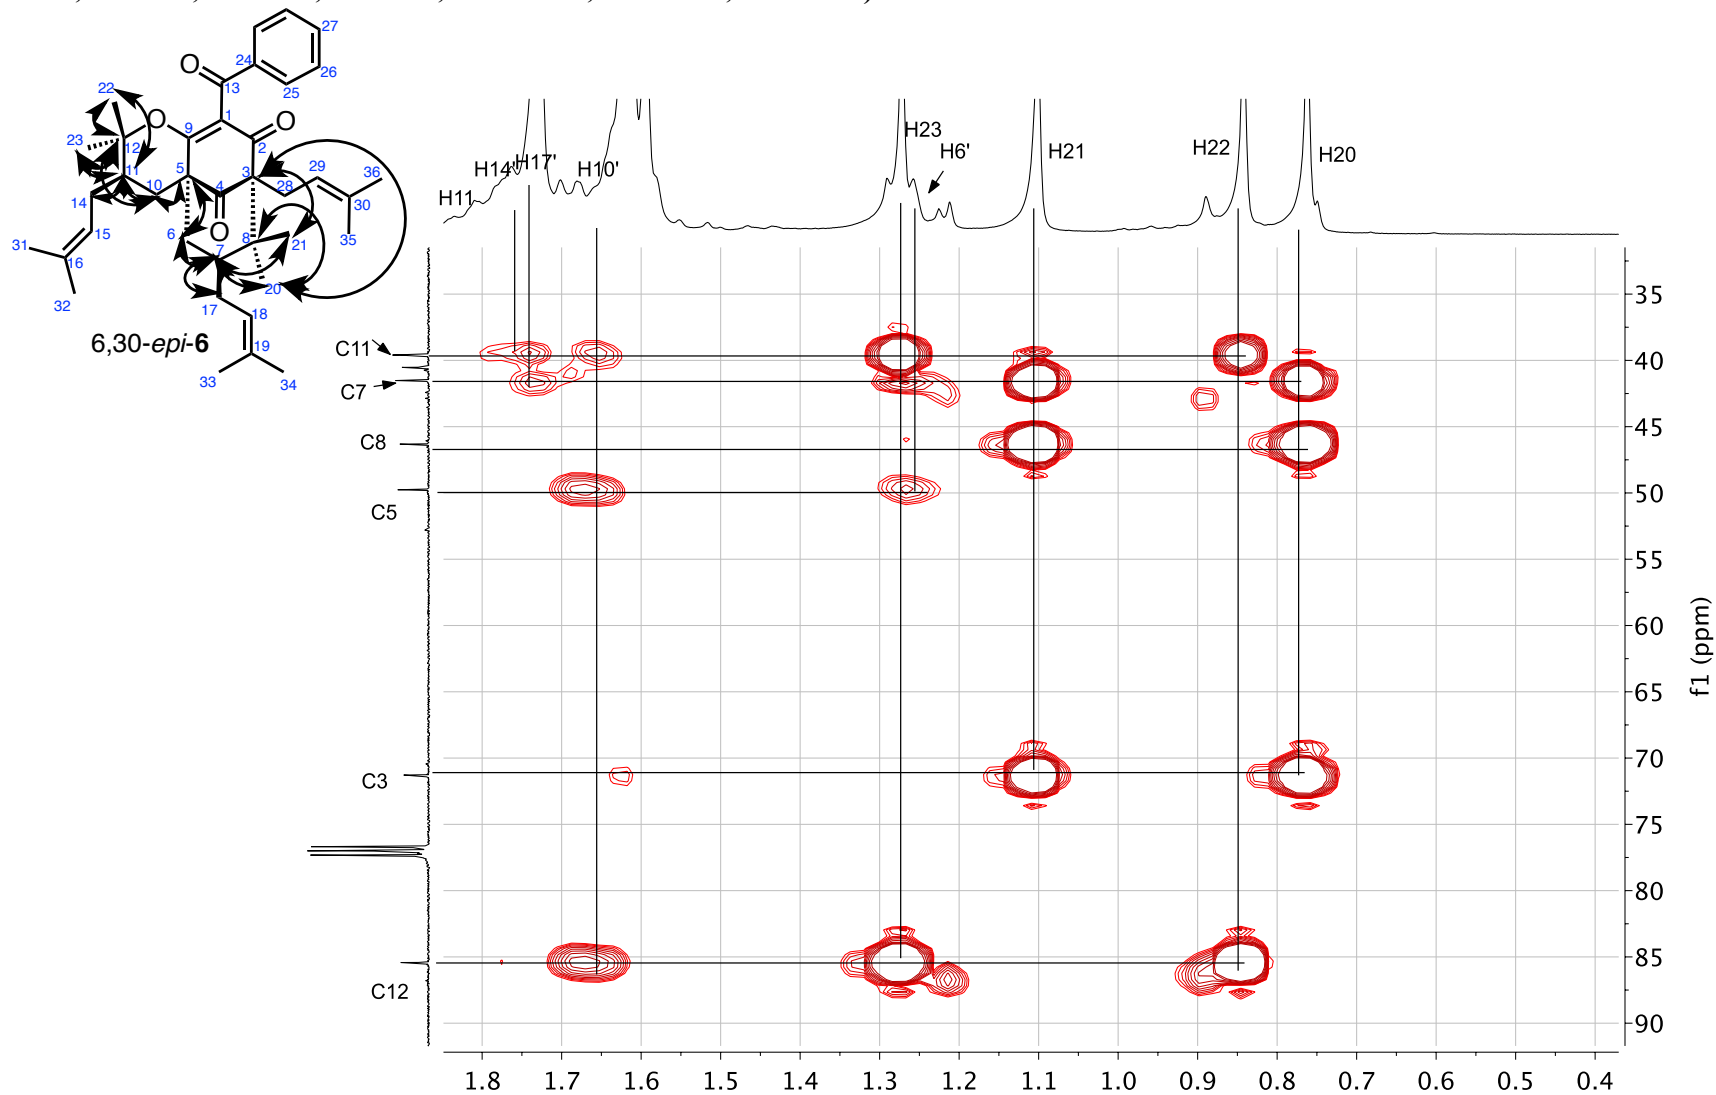

# NOESY Correlations for Compound 6,30-*epi*-6

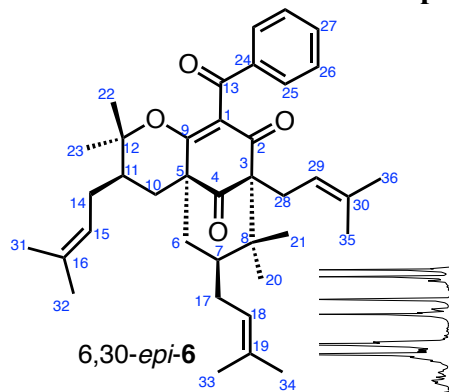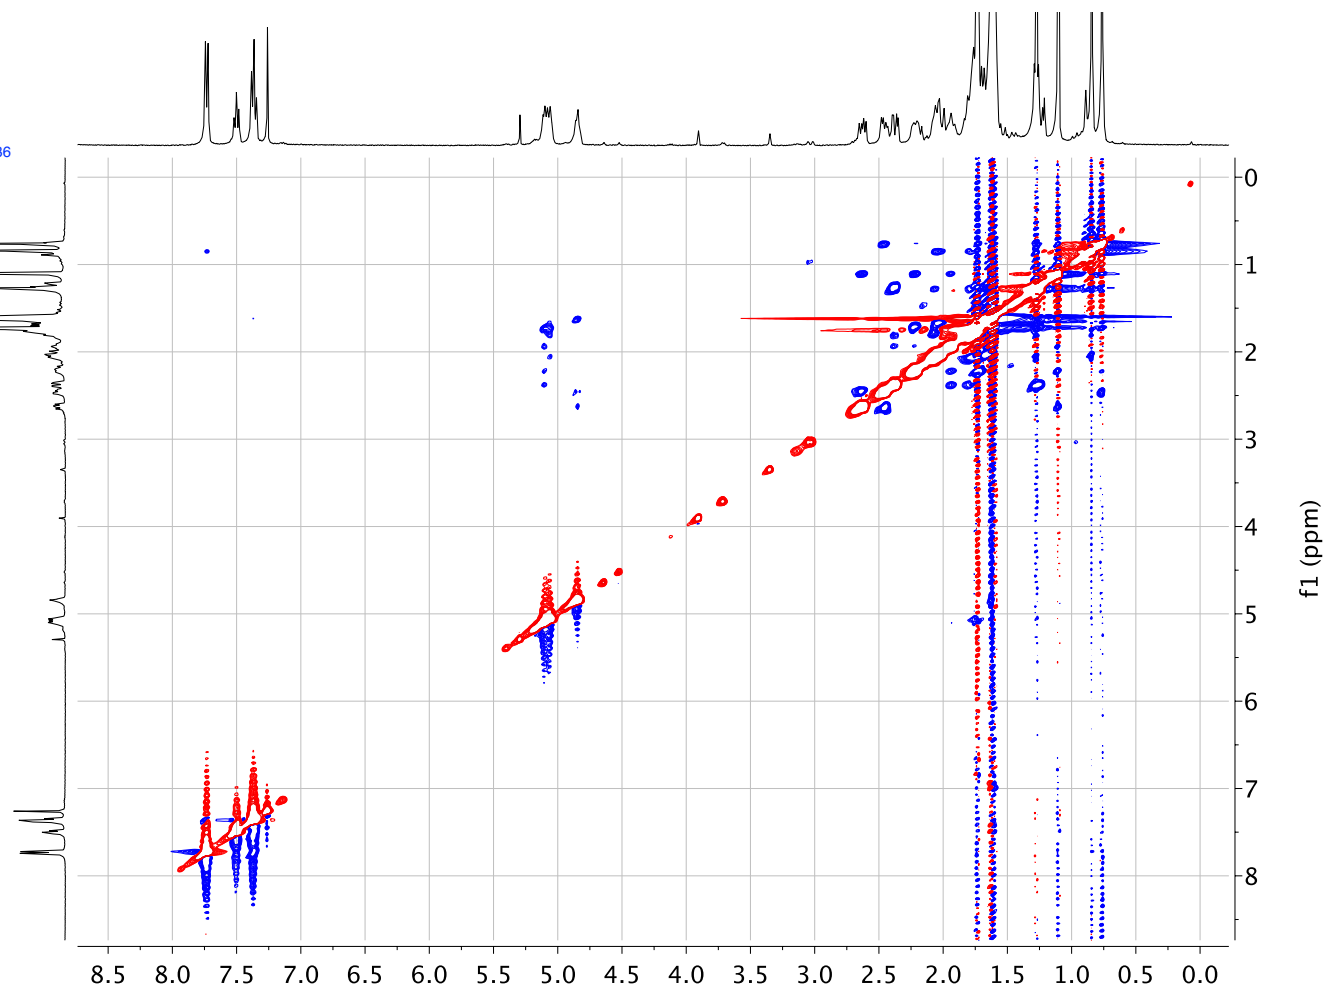

**NOESY Correlations (H20-H28', H22-H14, H21-H28, H11-H6 Diagnostic NOE, H6-H11 Diagnostic NOE, H6-H7)**

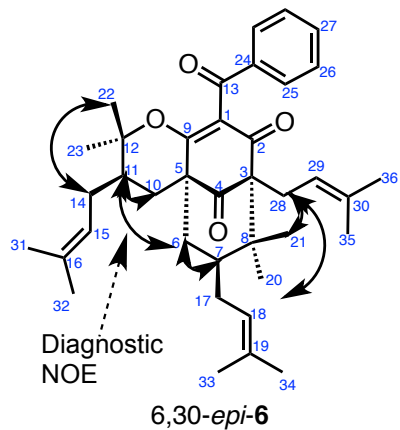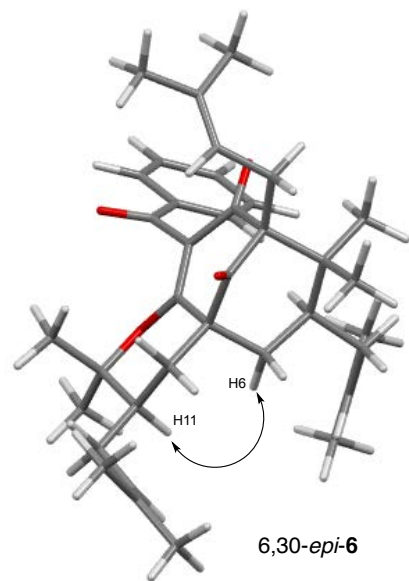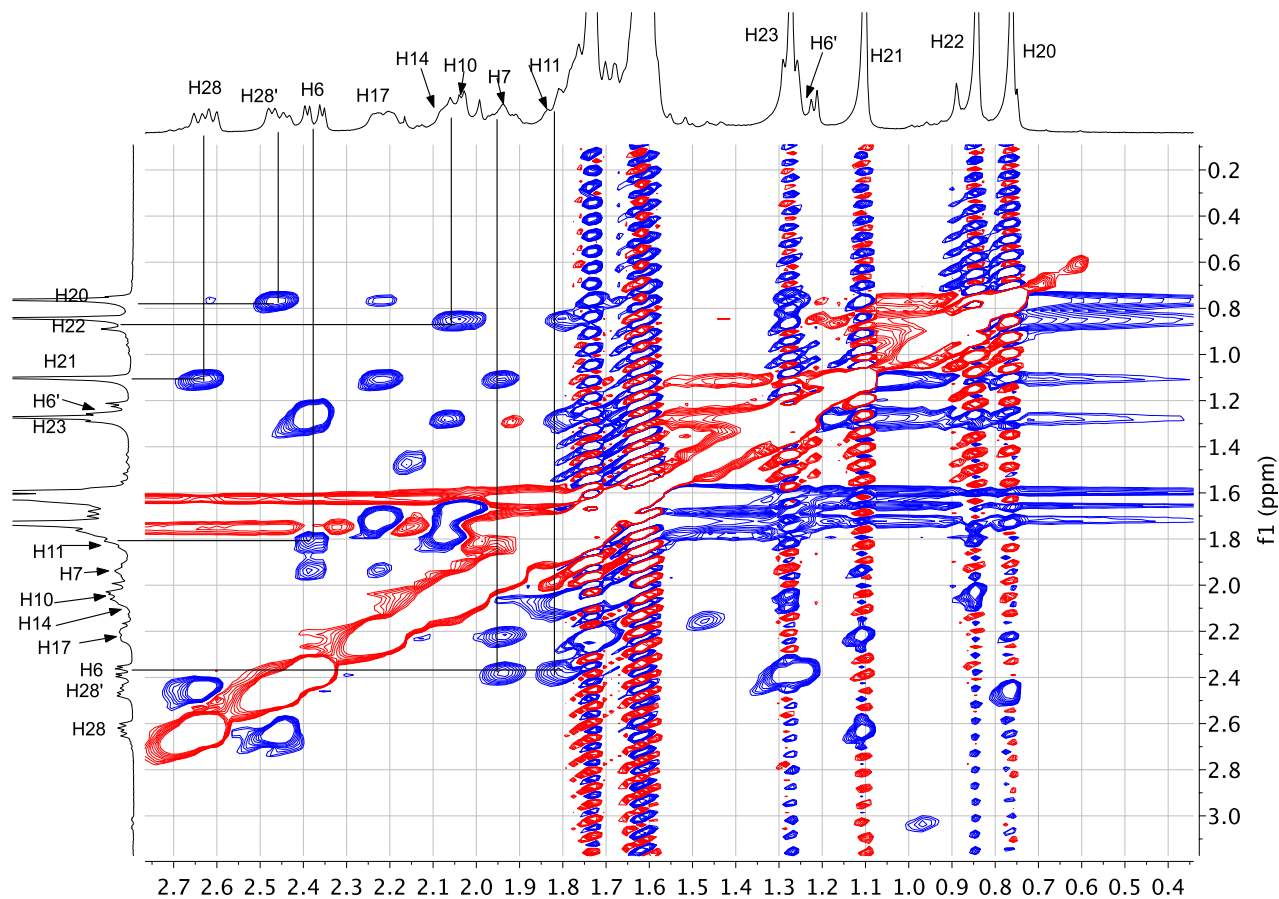

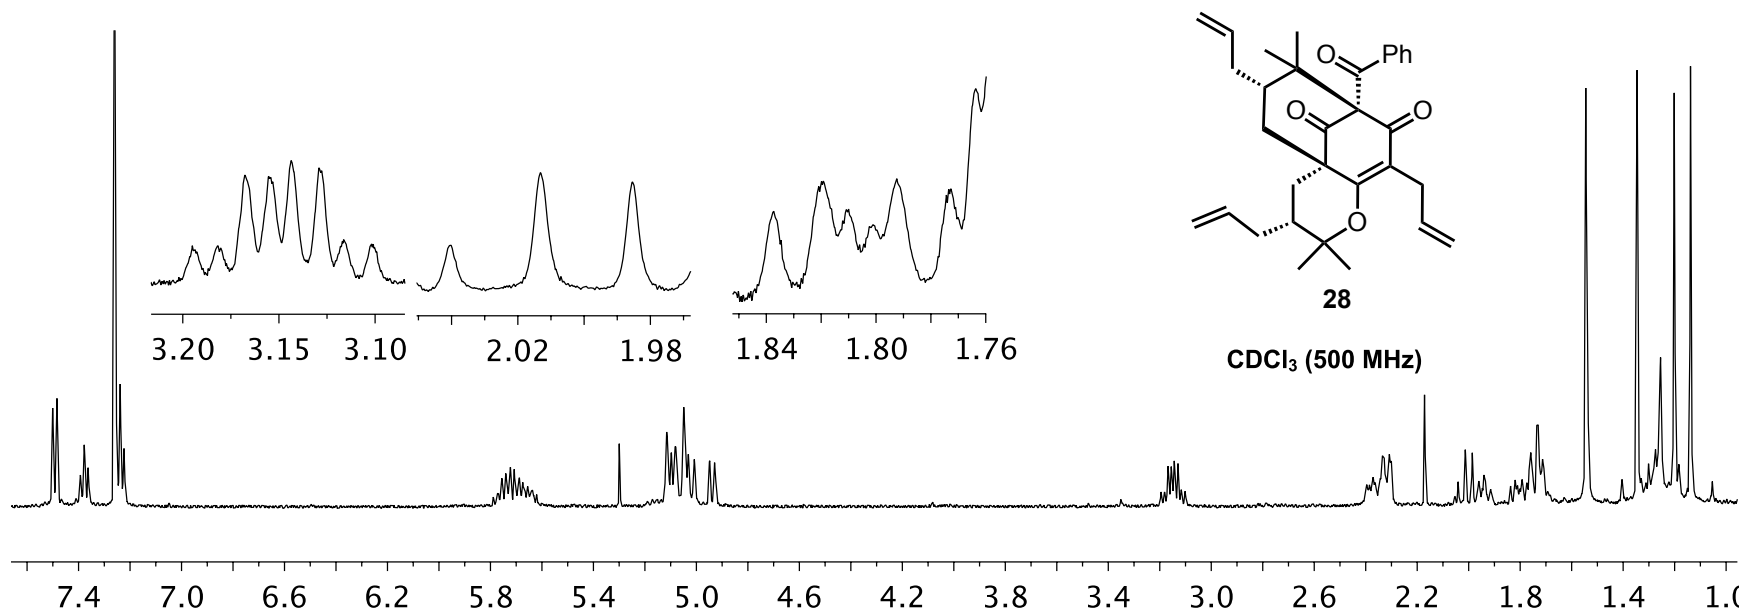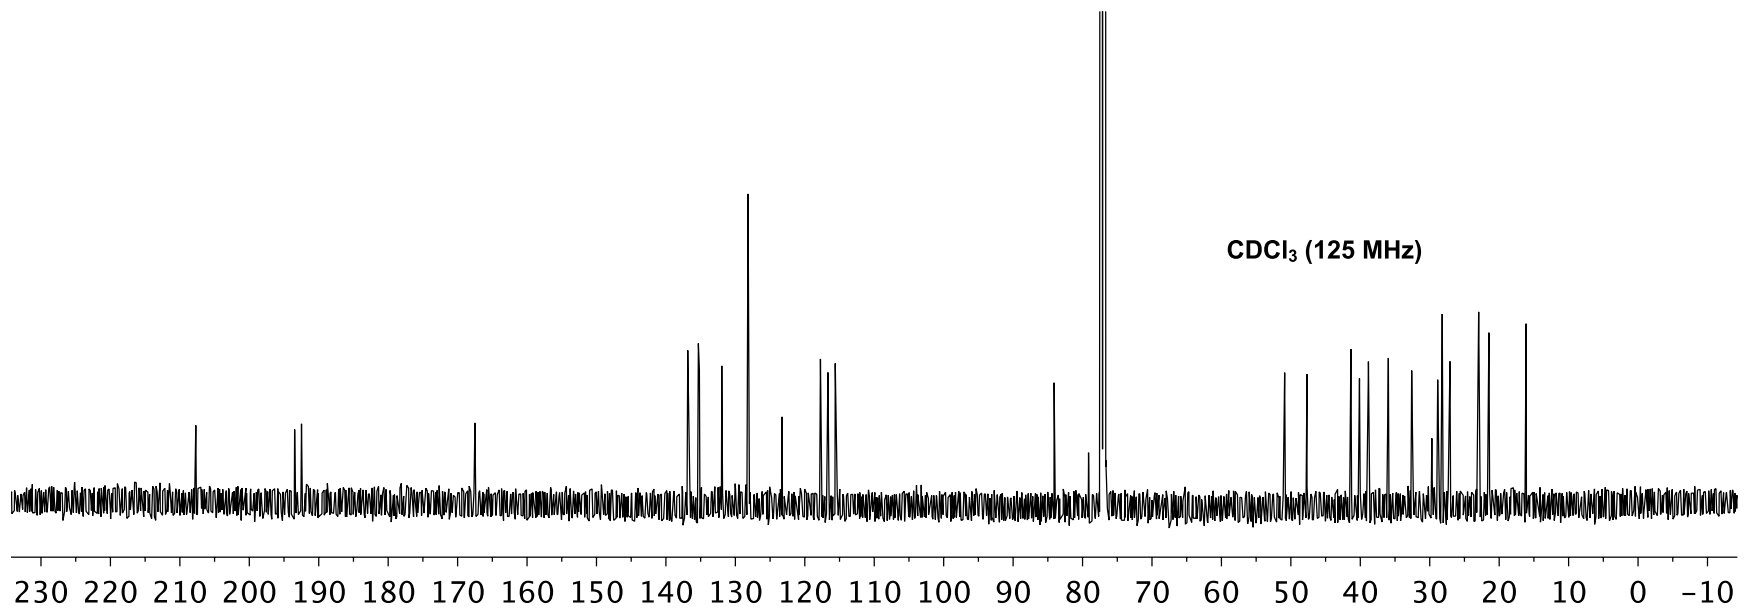

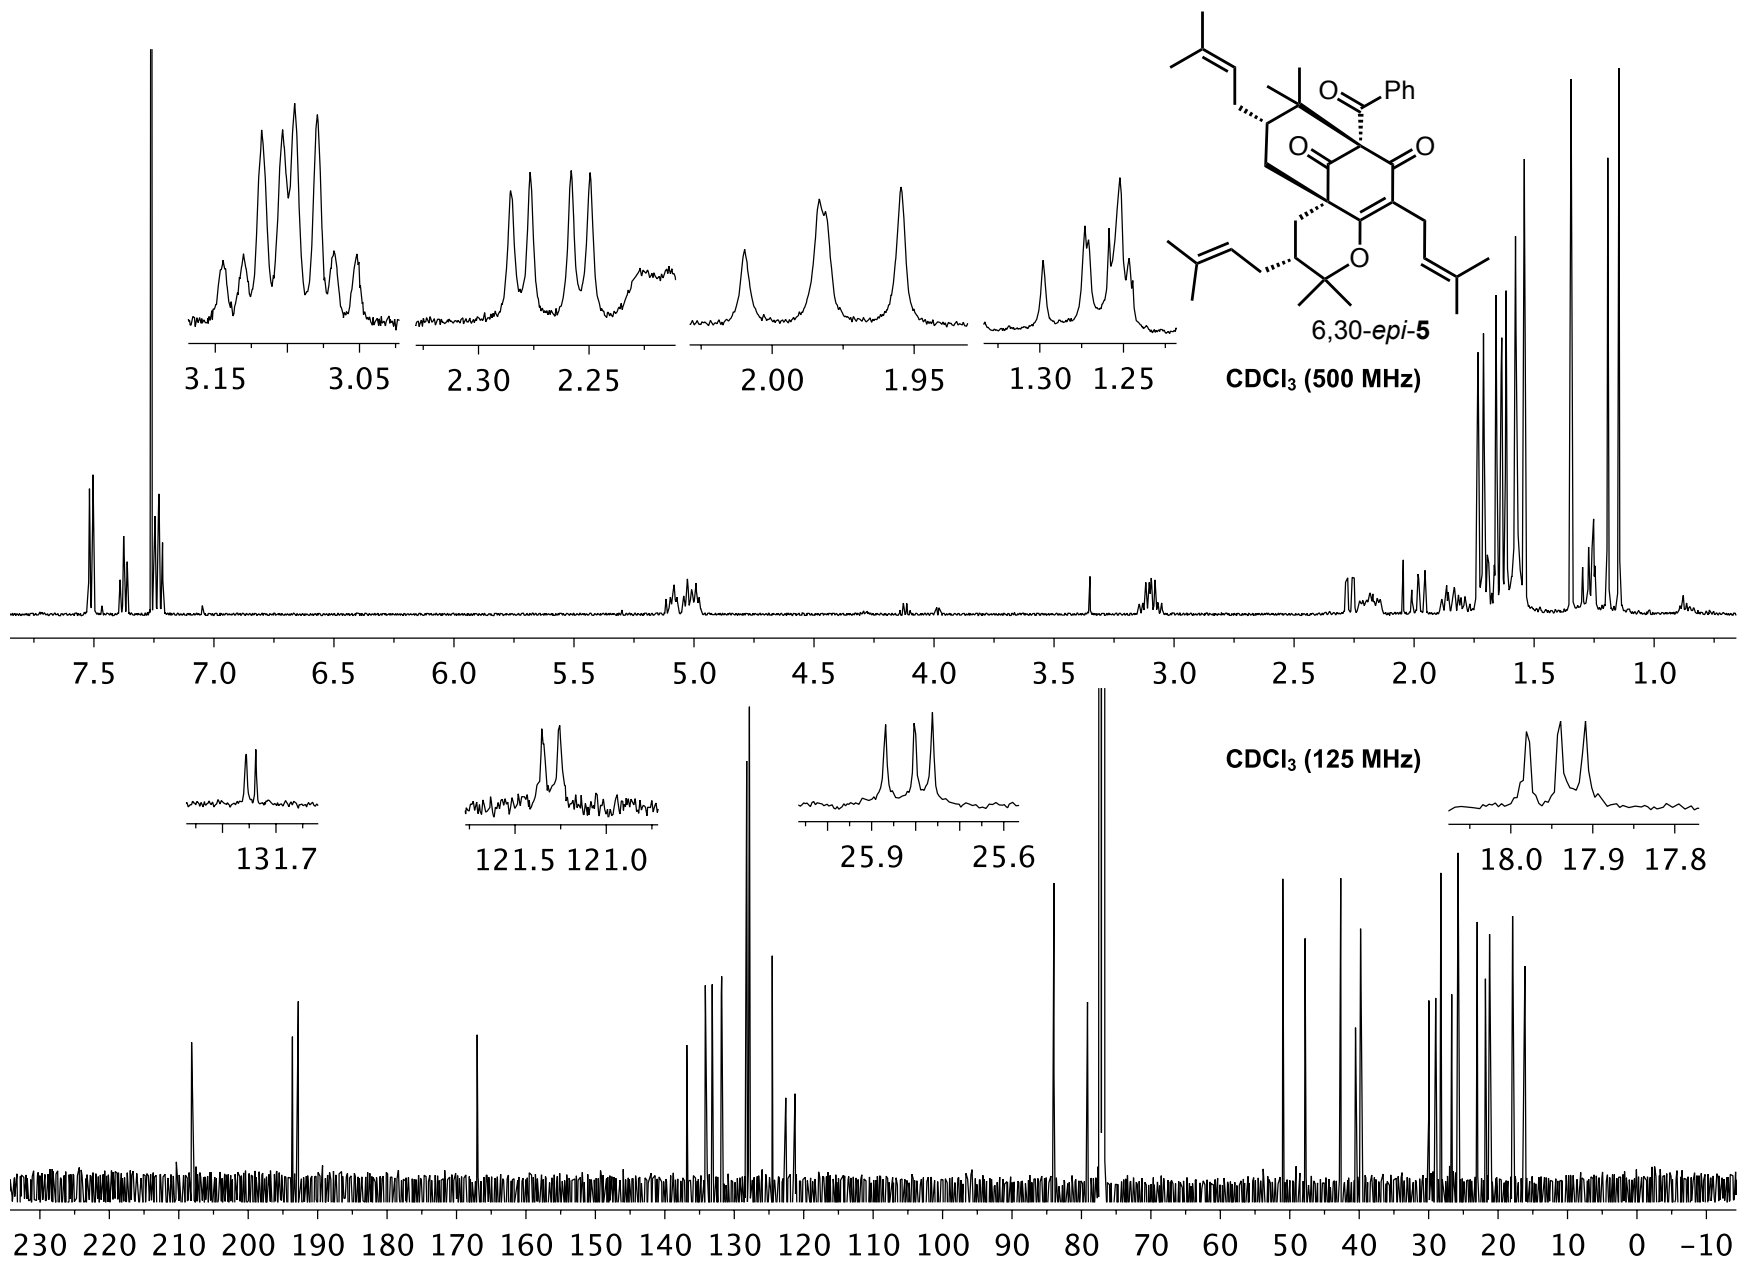

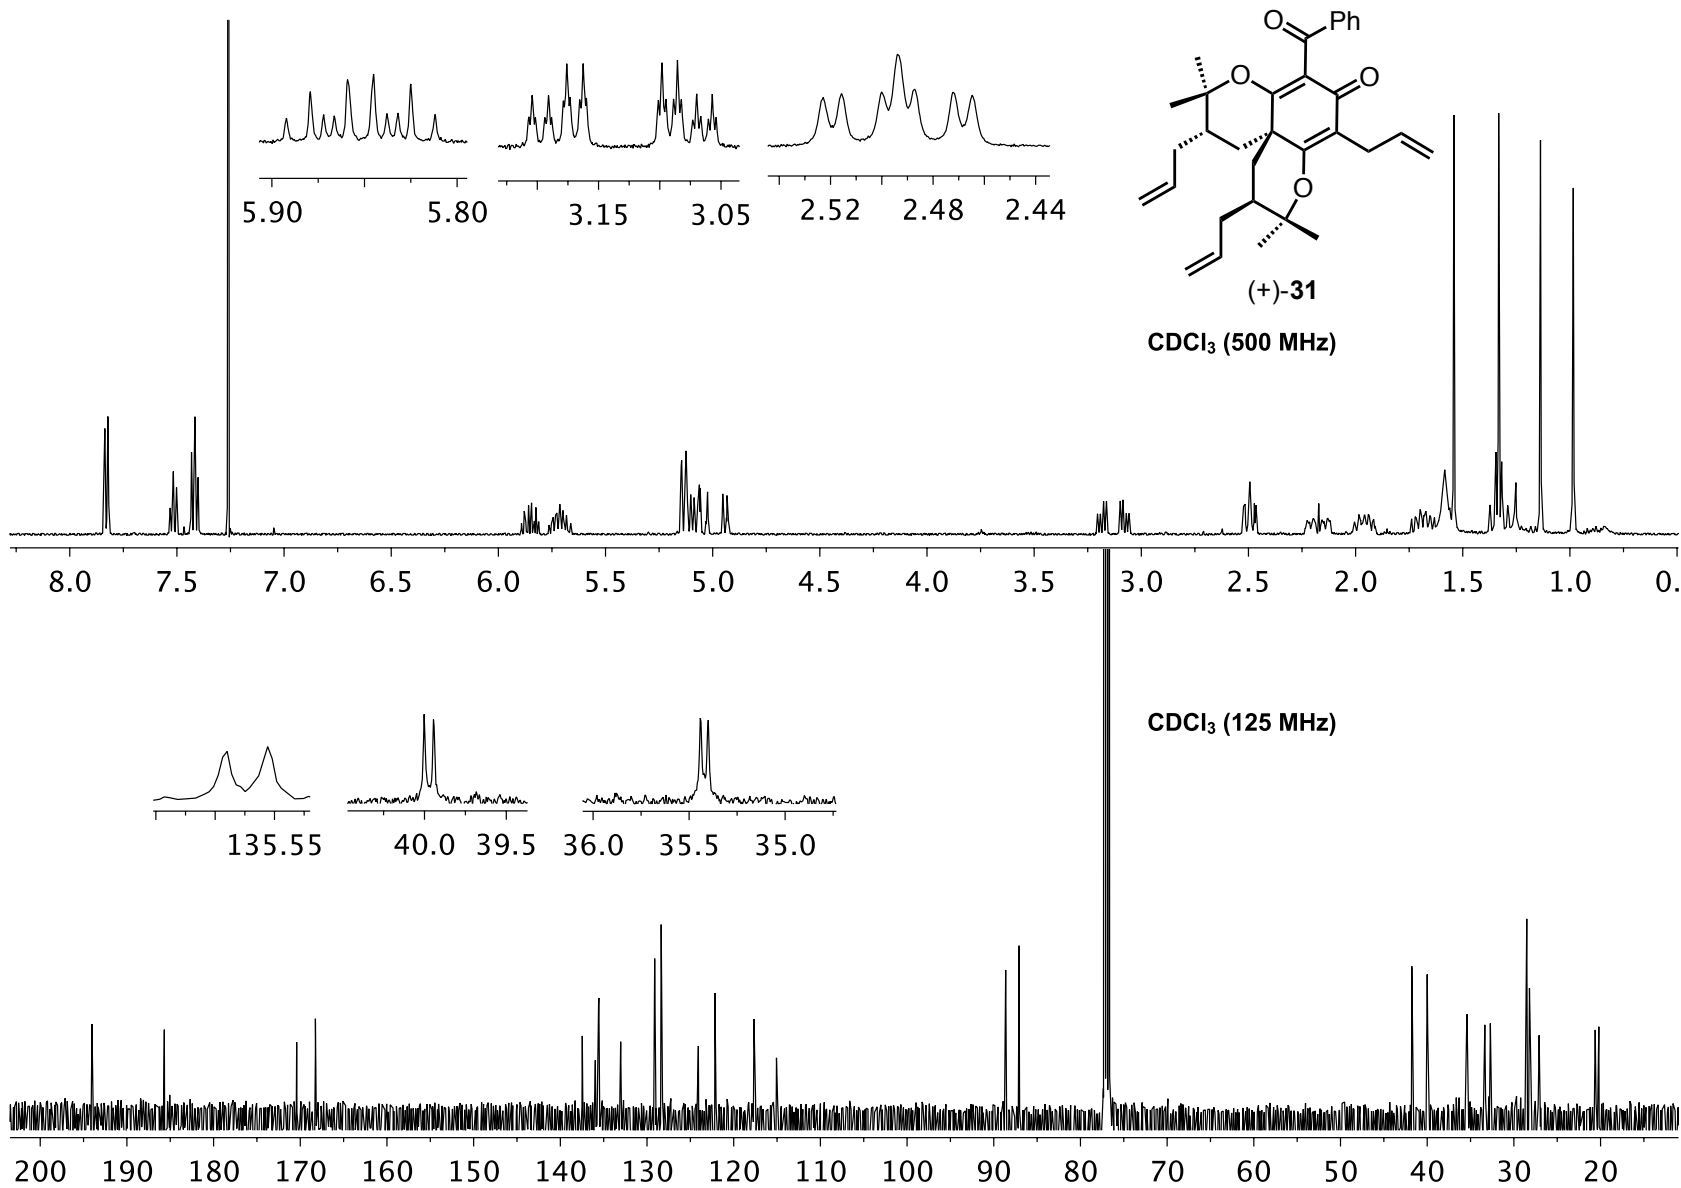

# COSY Correlations for Compound (+)-31

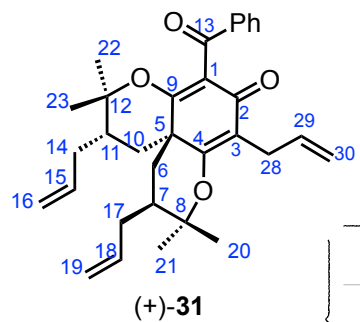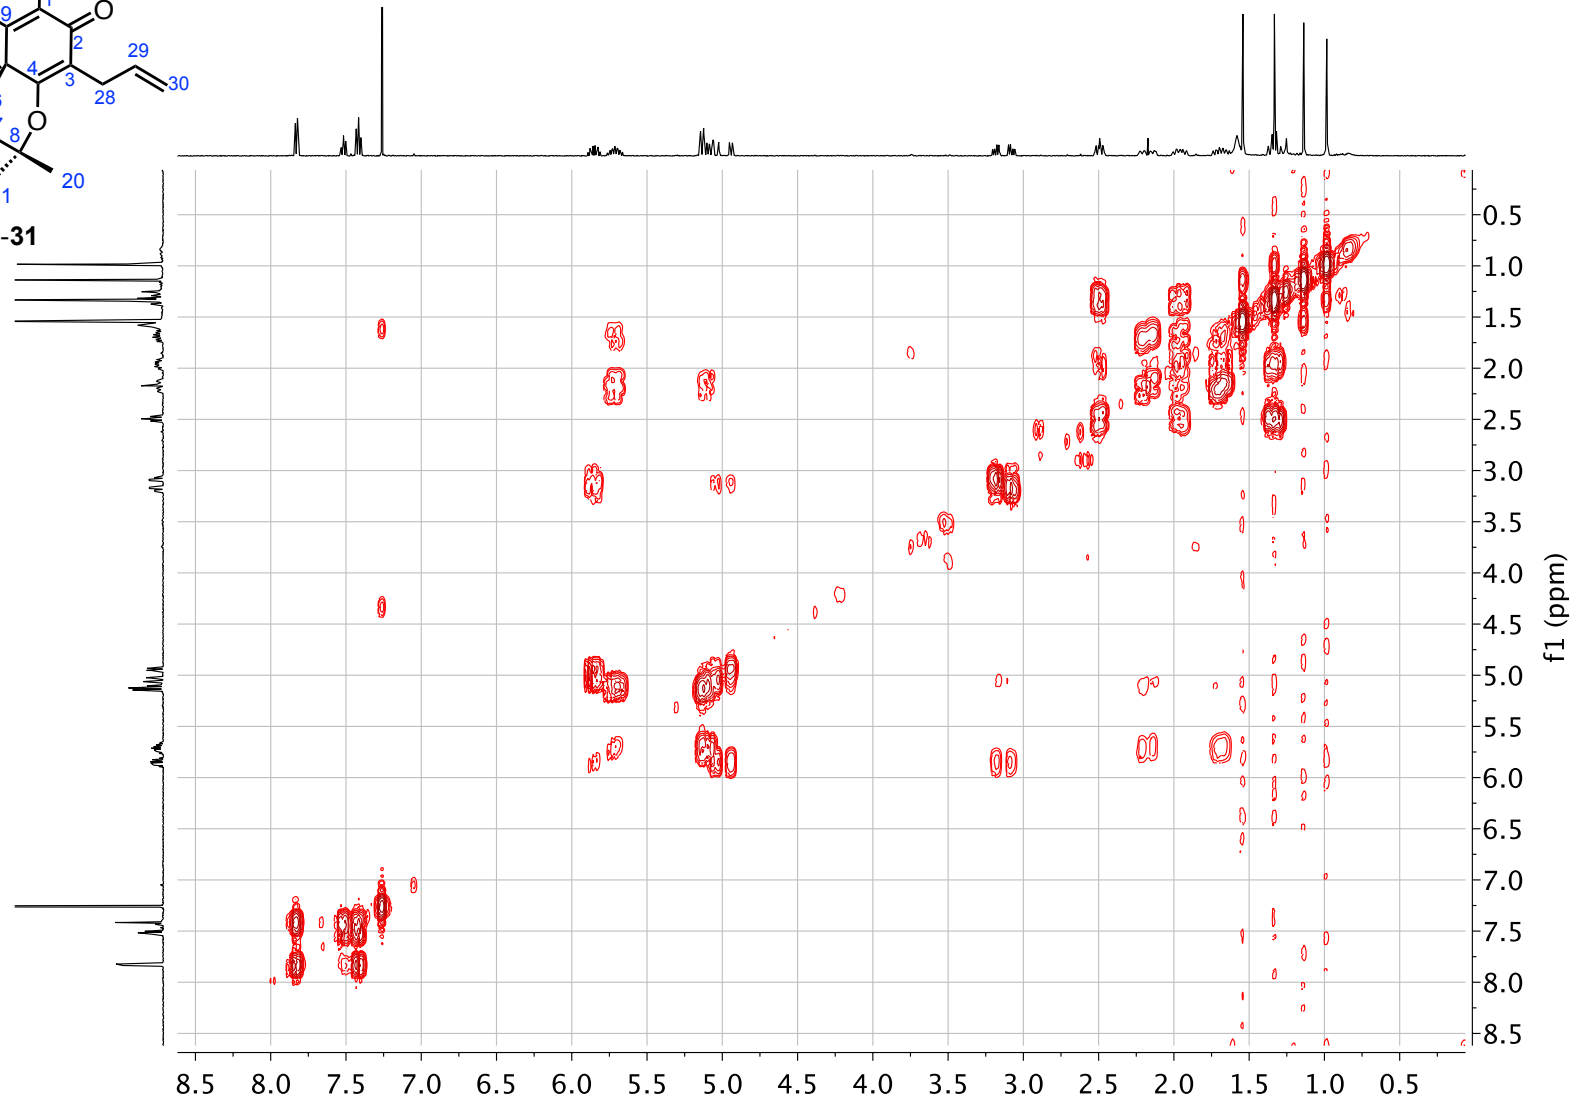



**COSY Correlations (H14'/H17'-H15/H18, H14/H17-H15/H18, H28/H28'-H29)**

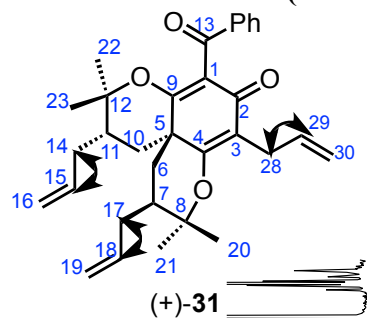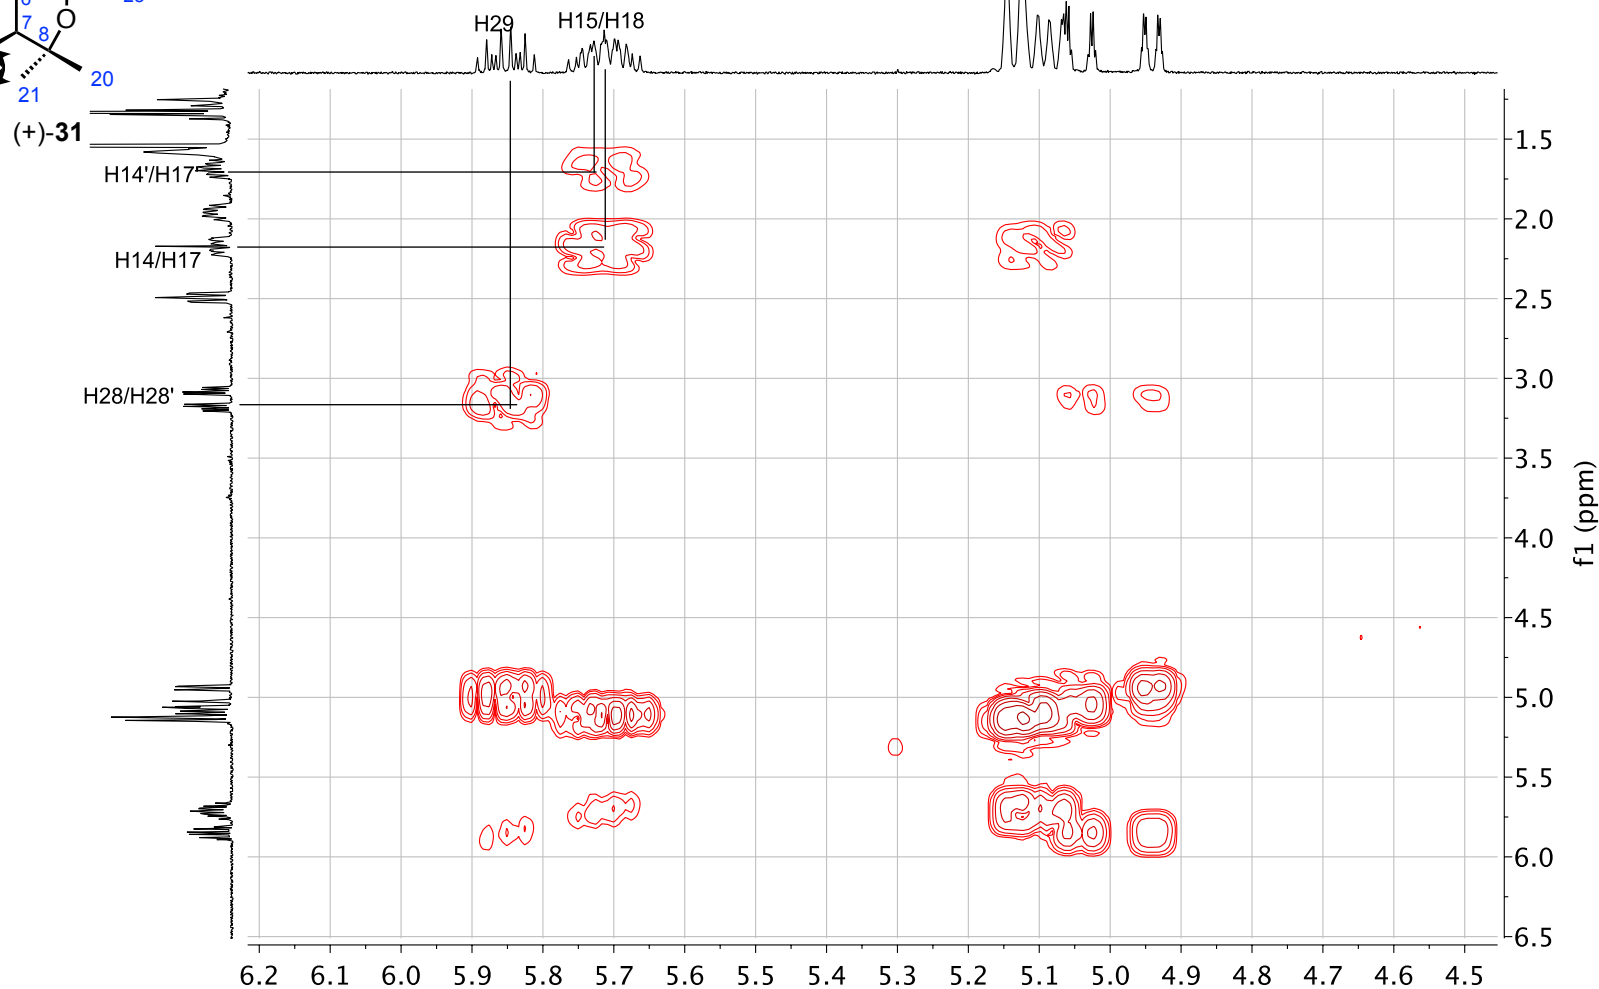

### HMBC Correlations for Compound (+)-31

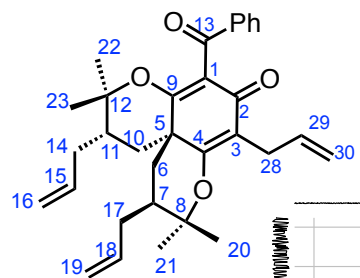

(+)-31

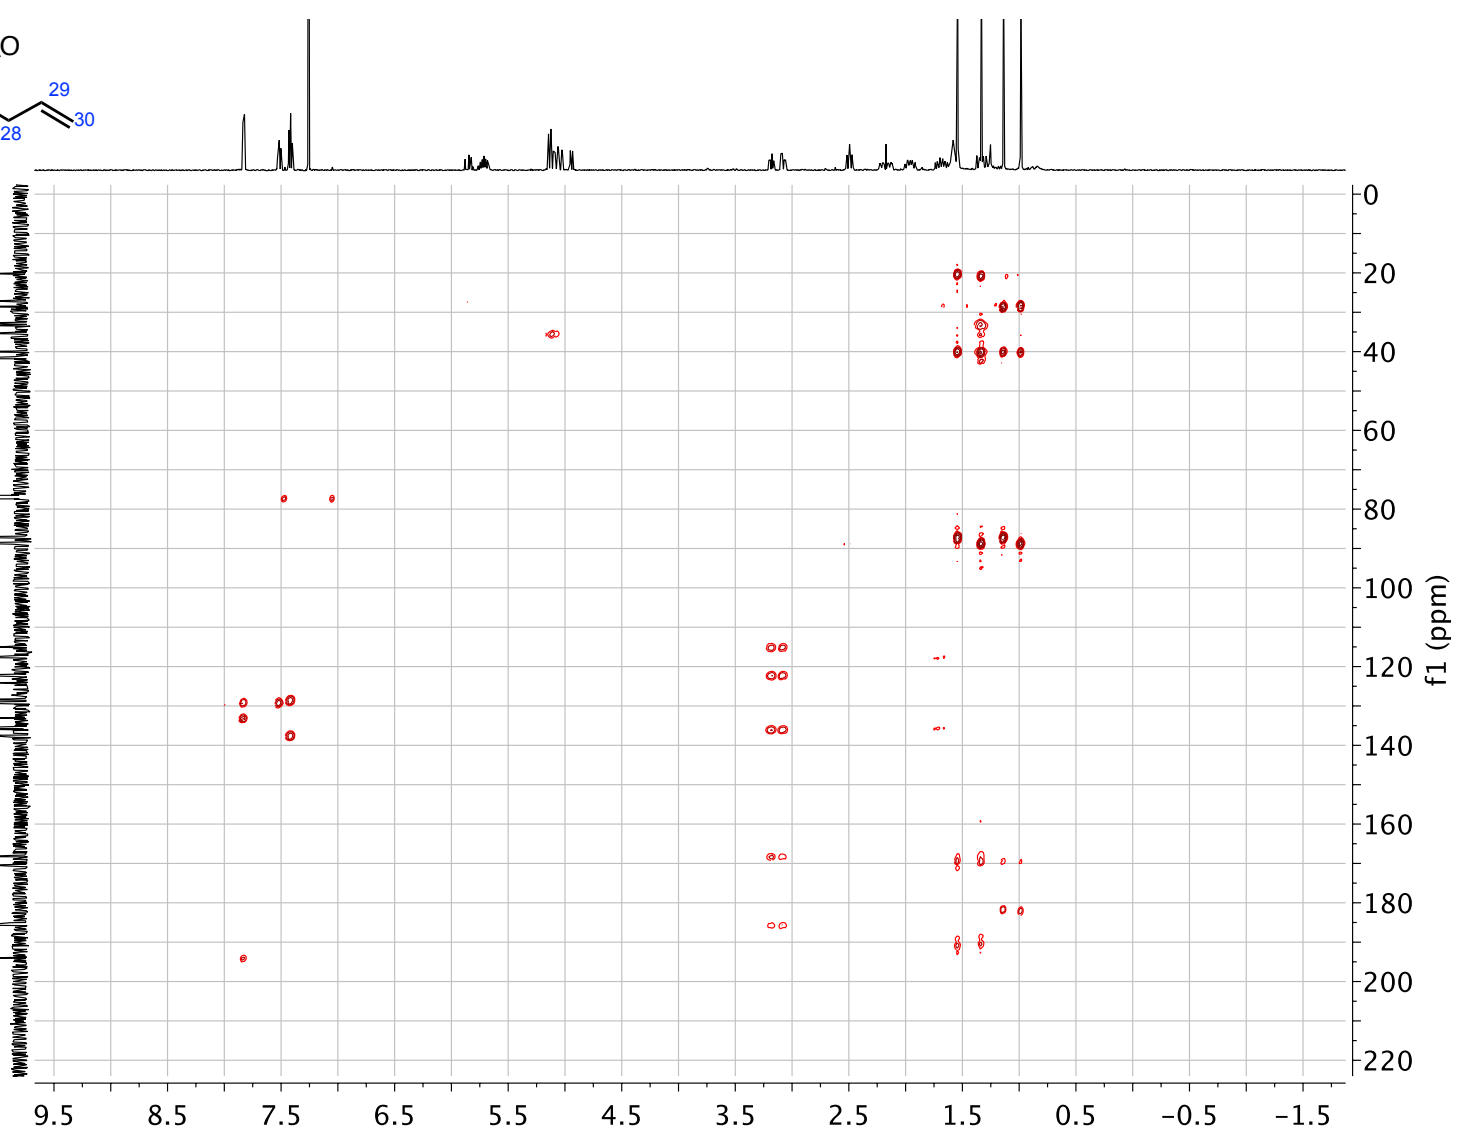

### HMBC Correlations (C8-H21, C8-H20, C12-H23, C12-H22)

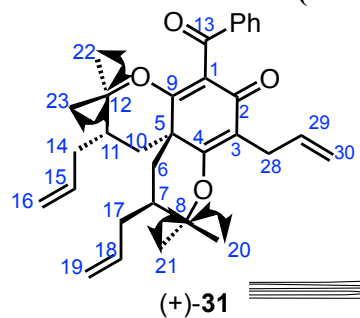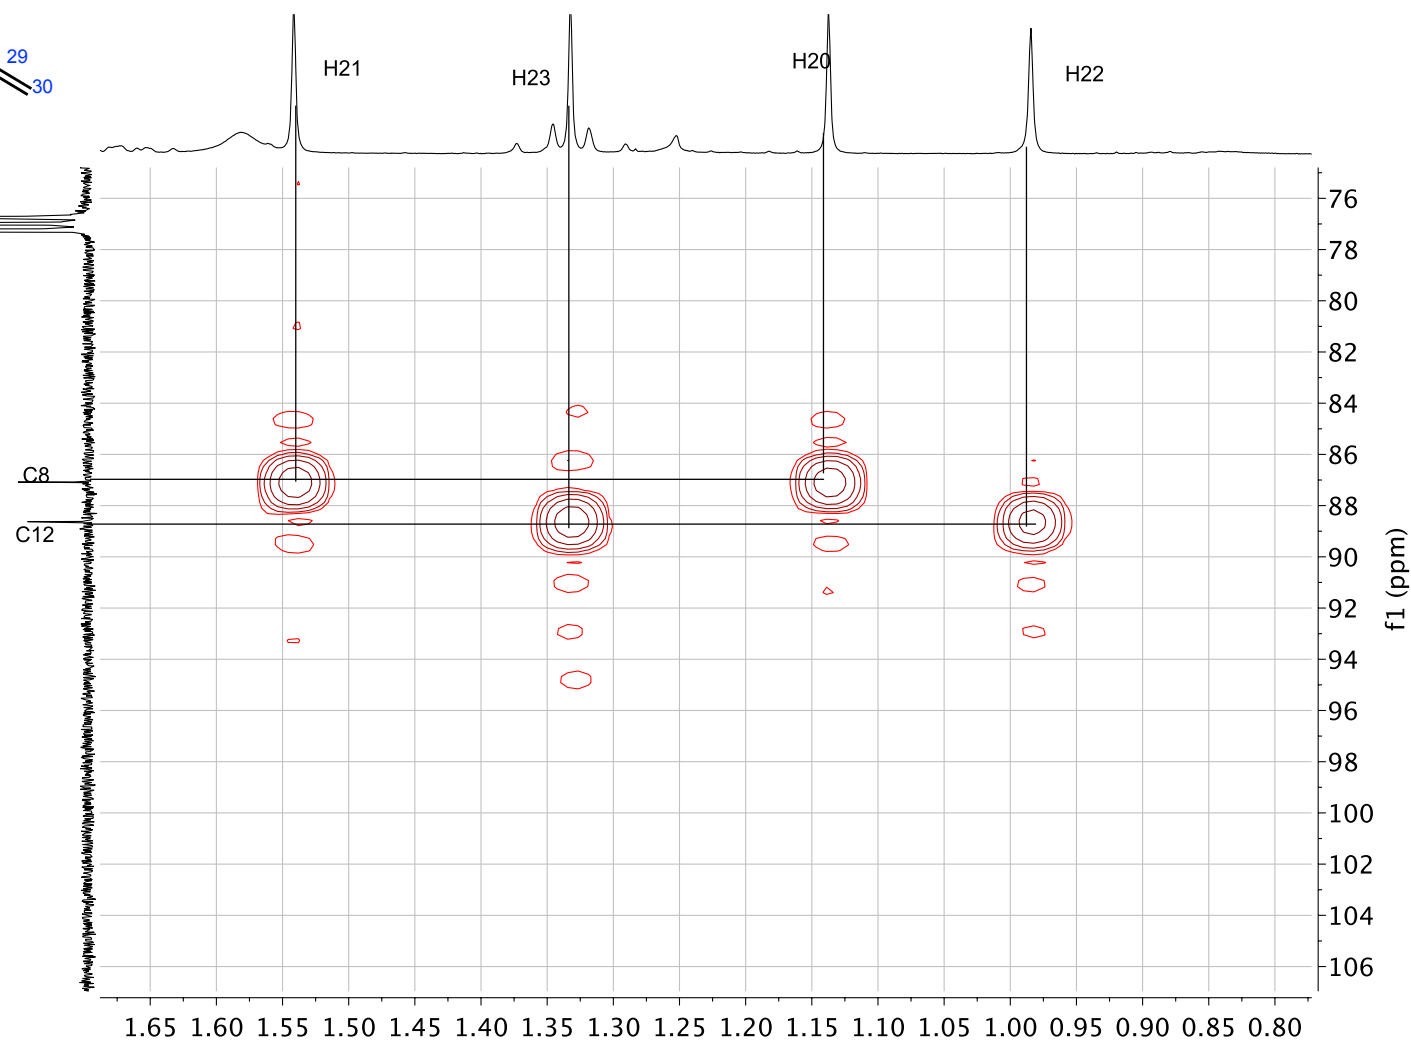

# NOESY Correlations for Compound (+)-31

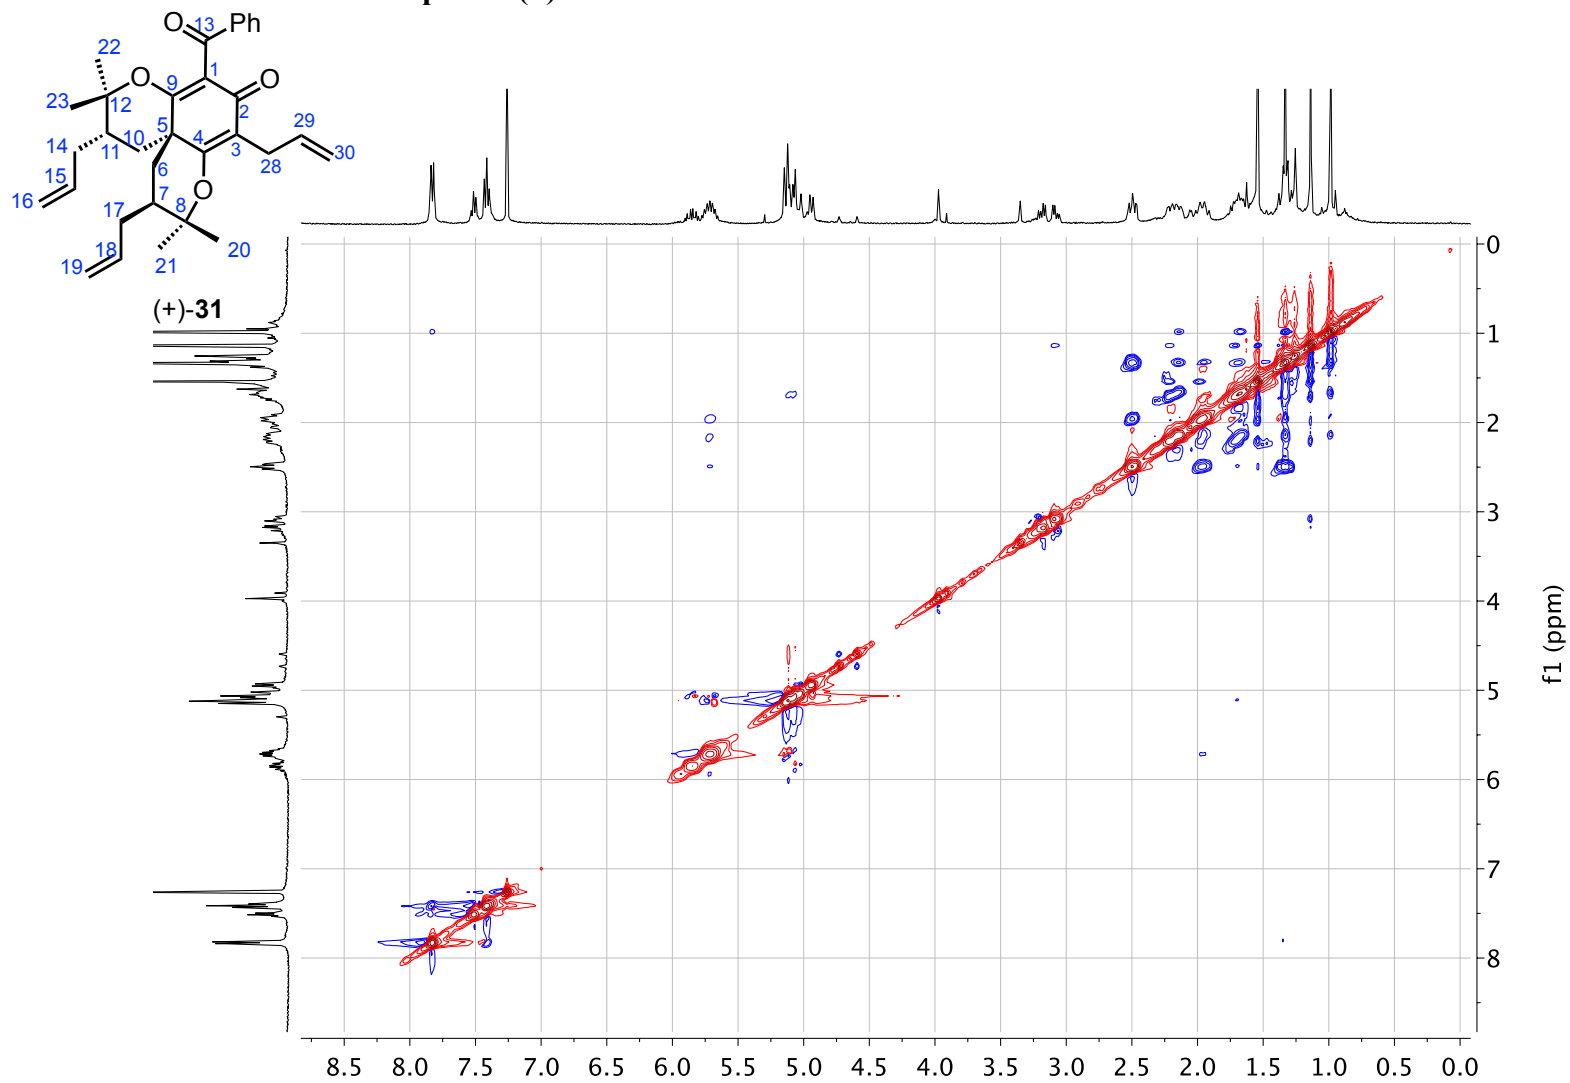

**NOESY Correlations (H22-H14, H22-H14', H22-H23, H22-H10', H20-H17, H20-H17', H20-H6', H23-H14, H23-H11, H21-H17, H21-H7, H11/H7-H6/H10, H22-H10')**

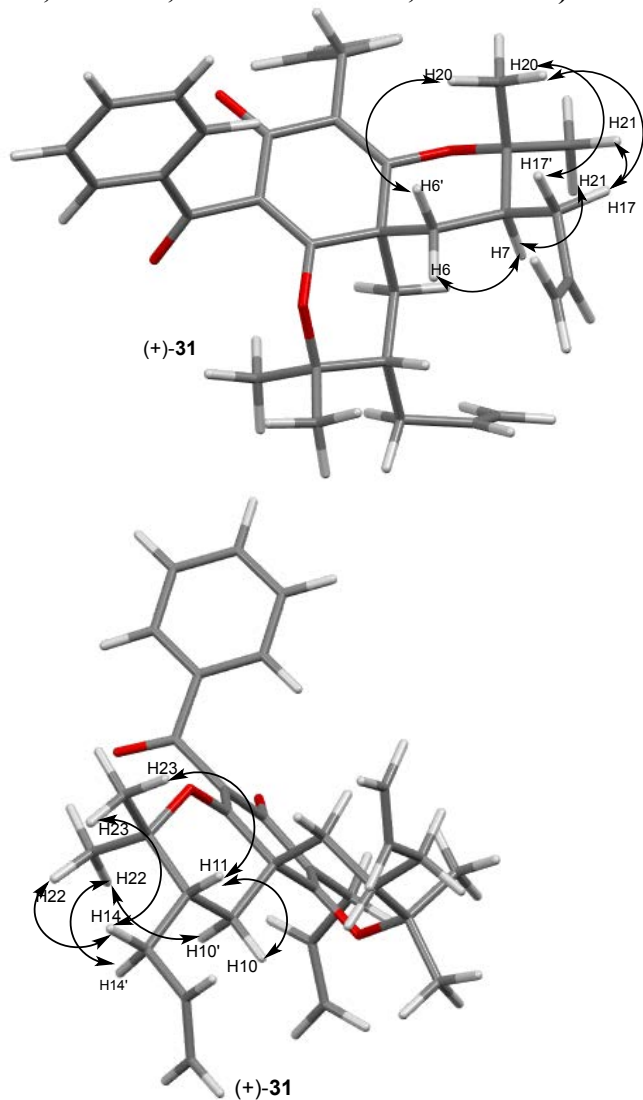

**KEY EVIDENCE:** H10 or H10' are not proximal to H17 or H17', a feature that would be required for the alternative diastereomer (not shown).

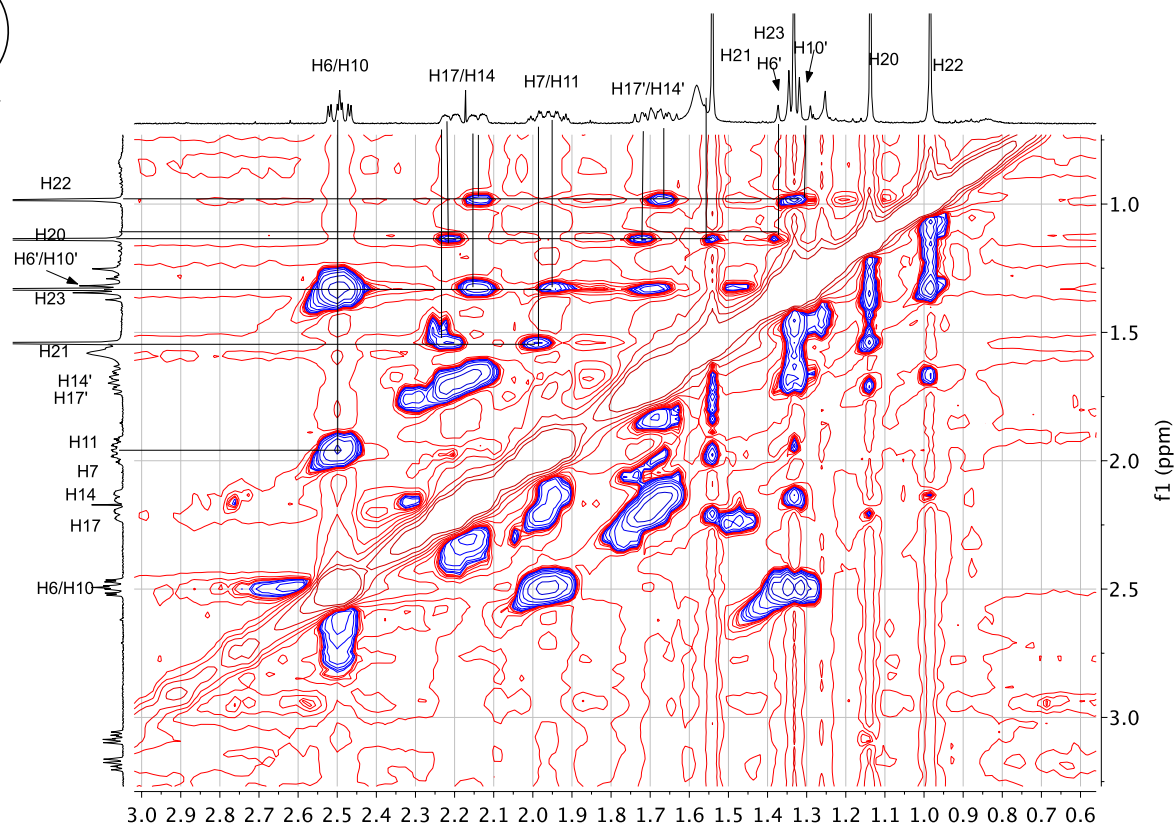

## VI. Computational Studies

**Figure S3.** Energy profiles for the transformation of **9A** to (-)-**8** or (+)-**13**, in presence of SnCl<sub>4</sub> (top), and in presence of BF<sub>3</sub>-OEt<sub>2</sub> (bottom).

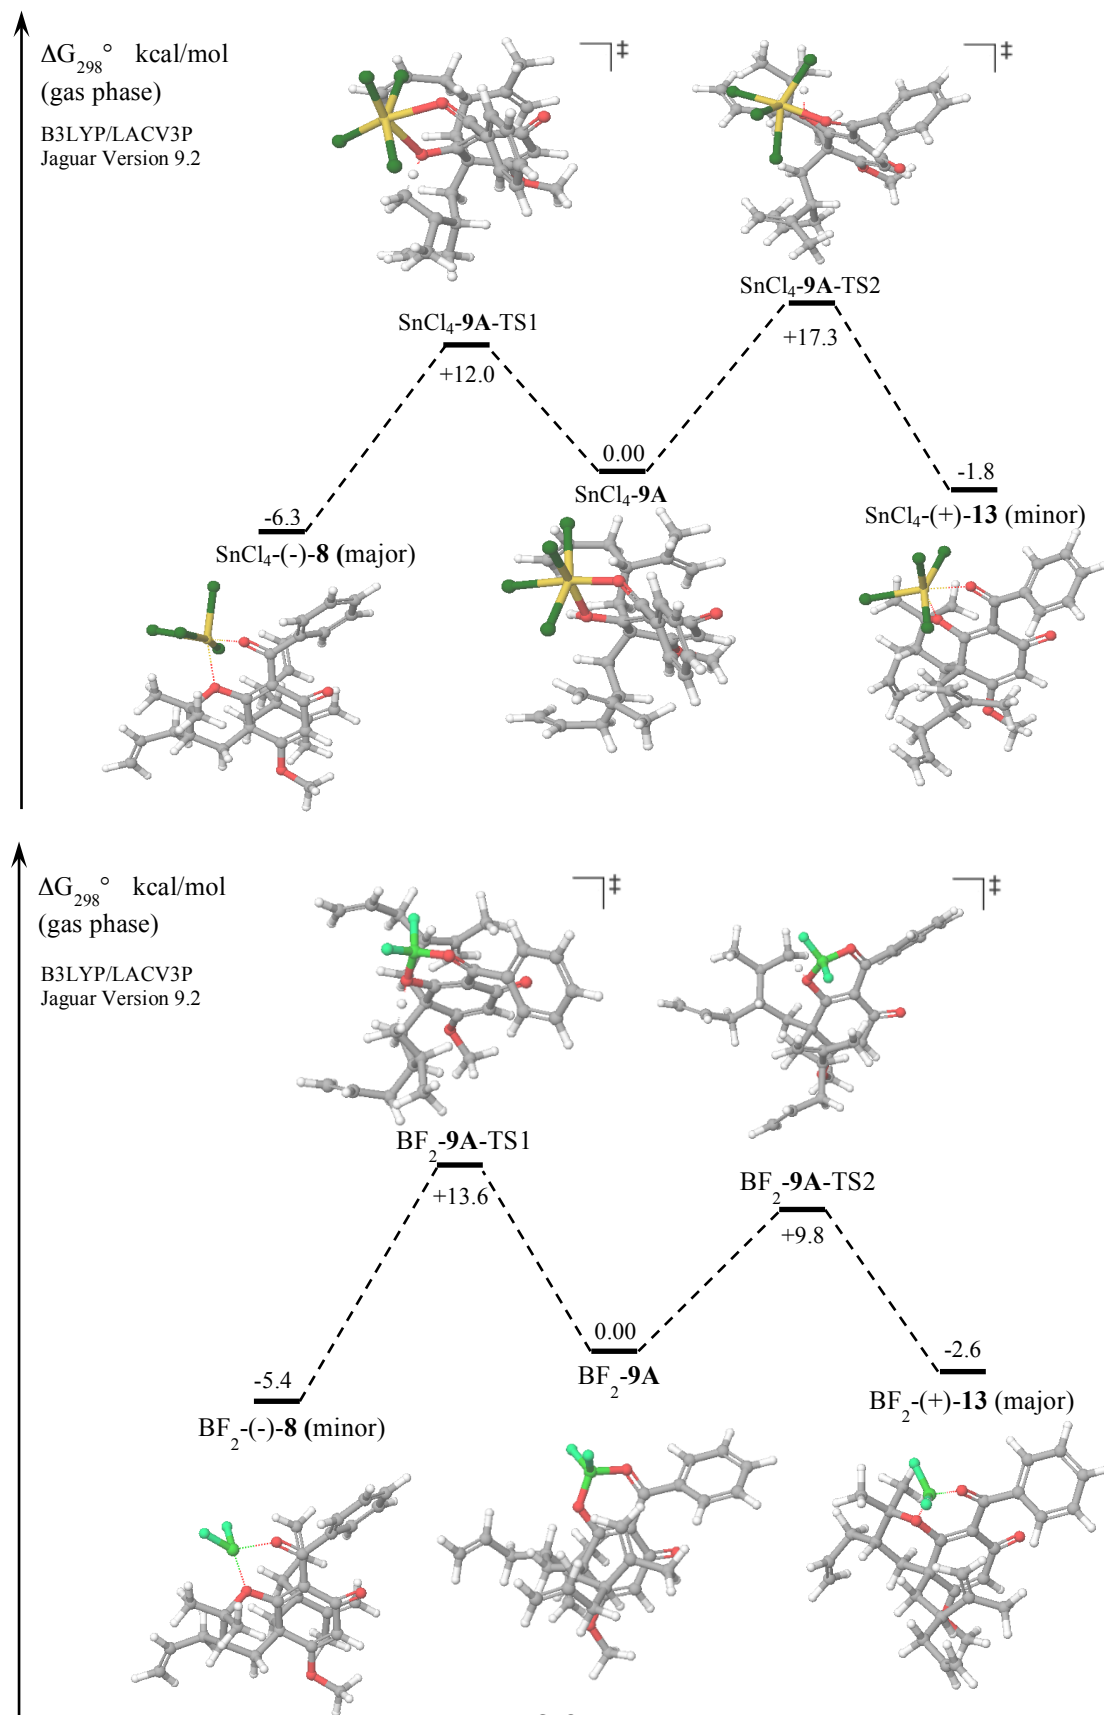

**Figure S4.** Transition State Models for Sn-9A-TS1 and BF<sub>2</sub>-9A-TS2.

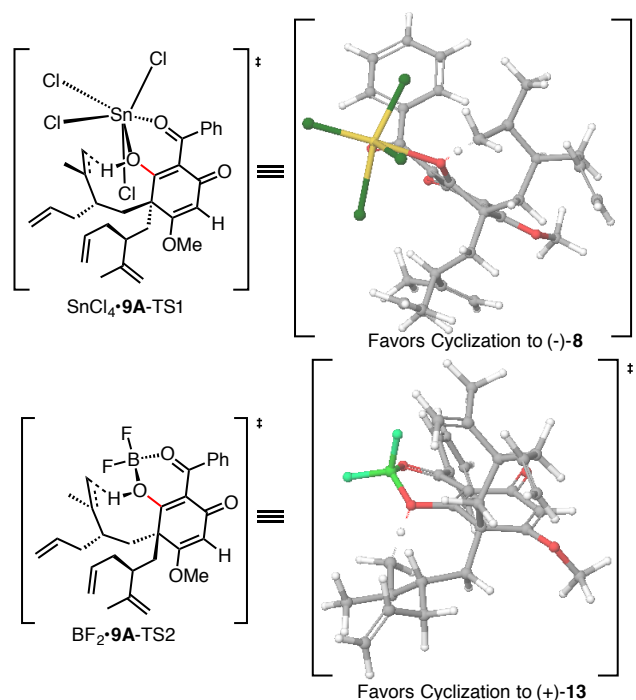

All structures were fully optimized by using Density Functional Theory (DFT) in Jaguar 9.2 (Schrodinger 2016-2) with the B3LYP functional. All calculations were carried out with the Los Alamos Effective Core Potentials Double Zeta (LACV3P) pseudospectral basis set for all atoms. Structures were evaluated by optimized energy values at the same level of theory. Transition state searches were performed using the QST method on Jaguar Version 9.2 (Schrodinger Maestro), using the same function and basis set.

#### SnCl<sub>4</sub>-9A

|     |                 |                 |                 |
|-----|-----------------|-----------------|-----------------|
| C1  | 0.116178000000  | -1.274229000000 | -1.097150000000 |
| C2  | -0.340901000000 | -2.545523000000 | -1.032200000000 |
| C3  | -1.089283000000 | -3.021493000000 | 0.133221000000  |
| C4  | -1.486909000000 | -2.028535000000 | 1.160575000000  |
| C5  | -1.017887000000 | -0.754714000000 | 1.093466000000  |
| C6  | -0.103497000000 | -0.199694000000 | -0.020155000000 |
| O7  | -1.320626000000 | -4.211205000000 | 0.293243000000  |
| H8  | -0.165078000000 | -3.269856000000 | -1.815226000000 |
| O9  | 0.826381000000  | -0.762825000000 | -2.159052000000 |
| C10 | 1.100916000000  | -1.612778000000 | -3.269334000000 |
| C11 | -2.315196000000 | -2.490034000000 | 2.320183000000  |
| O12 | -2.003571000000 | -2.161442000000 | 3.459054000000  |
| C13 | -3.572967000000 | -3.261140000000 | 2.101982000000  |
| C14 | -4.078725000000 | -4.074658000000 | 3.147228000000  |
| C15 | -5.271003000000 | -4.801247000000 | 2.972708000000  |
| C16 | -5.973539000000 | -4.725101000000 | 1.757947000000  |
| C17 | -5.480945000000 | -3.924740000000 | 0.712955000000  |
| C18 | -4.287959000000 | -3.198152000000 | 0.881796000000  |

|     |                  |                  |                  |
|-----|------------------|------------------|------------------|
| O19 | -1.3297970000000 | 0.1847820000000  | 2.0149790000000  |
| C20 | 1.2890030000000  | 0.2260890000000  | 0.5555620000000  |
| C21 | -0.7183780000000 | 1.0716860000000  | -0.7031860000000 |
| C22 | -1.9362360000000 | 0.8936500000000  | -1.6521340000000 |
| C23 | -3.2484770000000 | 0.4976890000000  | -0.9812250000000 |
| C24 | -4.0378580000000 | -0.5679420000000 | -1.7141380000000 |
| C25 | -3.7142740000000 | 1.0625670000000  | 0.1464140000000  |
| C26 | -2.1292600000000 | 2.1320470000000  | -2.5547540000000 |
| C27 | -2.4412670000000 | 3.4133500000000  | -1.8021730000000 |
| C28 | -1.5888210000000 | 4.4407760000000  | -1.6670190000000 |
| C29 | 1.9521250000000  | -0.6266240000000 | 1.6781120000000  |
| C30 | 2.3041840000000  | -2.0562270000000 | 1.2804690000000  |
| C31 | 2.8629660000000  | -2.3774210000000 | 0.1016930000000  |
| C32 | 2.0091970000000  | -3.1162320000000 | 2.3257740000000  |
| C33 | 3.2174660000000  | 0.0688390000000  | 2.2183810000000  |
| C34 | 2.9367570000000  | 1.3384760000000  | 3.0007170000000  |
| C35 | 3.1285120000000  | 2.5775860000000  | 2.5237590000000  |
| H36 | 1.6645760000000  | -1.0539130000000 | -4.0172020000000 |
| H37 | 1.7081290000000  | -2.4718850000000 | -2.9794410000000 |
| H38 | 0.1835790000000  | -1.9610300000000 | -3.7468570000000 |
| H39 | -3.5740030000000 | -4.1887410000000 | 4.0967700000000  |
| H40 | -5.6513560000000 | -5.4316110000000 | 3.7665250000000  |
| H41 | -6.8870780000000 | -5.2900730000000 | 1.6238910000000  |
| H42 | -6.0226330000000 | -3.8806100000000 | -0.2230750000000 |
| H43 | -3.9483600000000 | -2.6081740000000 | 0.0467170000000  |
| H44 | -0.7994020000000 | 0.9674860000000  | 2.0183700000000  |
| H45 | 1.2076890000000  | 1.2475250000000  | 0.9274920000000  |
| H46 | 2.0020010000000  | 0.3384230000000  | -0.2646750000000 |
| H47 | 0.0713020000000  | 1.4973850000000  | -1.3281750000000 |
| H48 | -0.9221490000000 | 1.8756100000000  | 0.0021190000000  |
| H49 | -1.6930140000000 | 0.0921930000000  | -2.3511370000000 |
| H50 | -4.3243280000000 | -0.1987310000000 | -2.7006440000000 |
| H51 | -3.4454420000000 | -1.4706080000000 | -1.8642850000000 |
| H52 | -4.9574000000000 | -0.8338680000000 | -1.1908100000000 |
| H53 | -4.6639340000000 | 0.7579740000000  | 0.5685170000000  |
| H54 | -3.1868620000000 | 1.8633390000000  | 0.6415350000000  |
| H55 | -2.9352950000000 | 1.9575330000000  | -3.2701160000000 |
| H56 | -1.2343710000000 | 2.2871390000000  | -3.1606110000000 |
| H57 | -3.4266250000000 | 3.4885380000000  | -1.3634080000000 |
| H58 | -1.8724150000000 | 5.3355060000000  | -1.1294980000000 |
| H59 | -0.5978000000000 | 4.4155380000000  | -2.0985690000000 |
| H60 | 1.2718070000000  | -0.7046960000000 | 2.5154050000000  |
| H61 | 3.1119600000000  | -3.4010230000000 | -0.1452540000000 |
| H62 | 3.0981000000000  | -1.6316160000000 | -0.6450020000000 |
| H63 | 0.9476590000000  | -3.1874330000000 | 2.5468600000000  |
| H64 | 2.3412140000000  | -4.1004610000000 | 1.9885890000000  |
| H65 | 2.5486590000000  | -2.8963490000000 | 3.2487460000000  |
| H66 | 3.9001490000000  | 0.2915380000000  | 1.3951540000000  |
| H67 | 3.7717070000000  | -0.5991490000000 | 2.8812070000000  |
| H68 | 2.5808280000000  | 1.2217850000000  | 4.0141160000000  |
| H69 | 2.9319520000000  | 3.4509690000000  | 3.1315160000000  |
| H70 | 3.5004360000000  | 2.7477660000000  | 1.5218290000000  |



|      |                  |                  |                 |
|------|------------------|------------------|-----------------|
| Sn71 | -1.5586980000000 | -0.2966440000000 | 3.9337700000000 |
| Cl72 | 0.6340240000000  | -0.4545900000000 | 5.1388150000000 |
| Cl73 | -2.5005390000000 | -1.0310690000000 | 6.0862560000000 |
| Cl74 | -1.2091420000000 | 2.0880850000000  | 4.3564170000000 |
| Cl75 | -3.8663200000000 | 0.3278560000000  | 3.5059650000000 |

SnCl<sub>4</sub>-9A-TS1

|     |                  |                  |                  |
|-----|------------------|------------------|------------------|
| C1  | 0.4582040000000  | -1.4473880000000 | -1.0121860000000 |
| C2  | 0.1765530000000  | -2.7458900000000 | -0.7525210000000 |
| C3  | -0.4926540000000 | -3.1332680000000 | 0.4919510000000  |
| C4  | -1.1058500000000 | -2.0603470000000 | 1.3036350000000  |
| C5  | -0.8669710000000 | -0.7547500000000 | 1.0226970000000  |
| C6  | 0.1222240000000  | -0.2703980000000 | -0.0771860000000 |
| O7  | -0.5507060000000 | -4.3039180000000 | 0.8499750000000  |
| H8  | 0.4327970000000  | -3.5469970000000 | -1.4305640000000 |
| O9  | 1.0573610000000  | -1.0137270000000 | -2.1730400000000 |
| C10 | 1.3403020000000  | -1.9606130000000 | -3.1991270000000 |
| C11 | -2.0567480000000 | -2.4626410000000 | 2.3832270000000  |
| O12 | -1.9734330000000 | -1.9668360000000 | 3.5033310000000  |
| C13 | -3.2187650000000 | -3.3286940000000 | 2.0429690000000  |
| C14 | -3.7364120000000 | -4.2088870000000 | 3.0240260000000  |
| C15 | -4.8658820000000 | -4.9984890000000 | 2.7417690000000  |
| C16 | -5.4918960000000 | -4.9123970000000 | 1.4865260000000  |
| C17 | -4.9796110000000 | -4.0495690000000 | 0.5014480000000  |
| C18 | -3.8410140000000 | -3.2658590000000 | 0.7721940000000  |
| O19 | -1.6428000000000 | 0.2047400000000  | 1.6151080000000  |
| C20 | 1.4482430000000  | 0.2603930000000  | 0.5621400000000  |
| C21 | -0.4019960000000 | 0.9016450000000  | -0.9626140000000 |
| C22 | -1.7814890000000 | 0.7139580000000  | -1.6495980000000 |
| C23 | -2.9507470000000 | 0.6525390000000  | -0.6309410000000 |
| C24 | -4.3372370000000 | 1.0049240000000  | -1.1938850000000 |
| C25 | -2.5683490000000 | 1.3635930000000  | 0.5855370000000  |
| C26 | -1.9475950000000 | 1.7305400000000  | -2.8070650000000 |
| C27 | -1.7626390000000 | 3.1806510000000  | -2.4059140000000 |
| C28 | -0.7075990000000 | 3.9261650000000  | -2.7696840000000 |
| C29 | 2.2624840000000  | -0.6102290000000 | 1.5685160000000  |
| C30 | 2.8855900000000  | -1.8810940000000 | 0.9995140000000  |
| C31 | 3.4687600000000  | -1.9467330000000 | -0.2094920000000 |
| C32 | 2.8450970000000  | -3.0893620000000 | 1.9185560000000  |
| C33 | 3.4022200000000  | 0.2164710000000  | 2.2062960000000  |
| C34 | 2.9456370000000  | 1.2968200000000  | 3.1671200000000  |
| C35 | 2.9678390000000  | 2.6112420000000  | 2.8990870000000  |
| H36 | 1.7977450000000  | -1.4407220000000 | -4.0431730000000 |
| H37 | 2.0460980000000  | -2.7237010000000 | -2.8667930000000 |
| H38 | 0.4289120000000  | -2.4360870000000 | -3.5664200000000 |
| H39 | -3.2789100000000 | -4.3260280000000 | 3.9967200000000  |
| H40 | -5.2525630000000 | -5.6857280000000 | 3.4818740000000  |
| H41 | -6.3602910000000 | -5.5227090000000 | 1.2726550000000  |
| H42 | -5.4625910000000 | -4.0040540000000 | -0.4642690000000 |
| H43 | -3.4841720000000 | -2.6260130000000 | -0.0216900000000 |
| H45 | 1.2158420000000  | 1.1943020000000  | 1.0749360000000  |
| H46 | 2.1221170000000  | 0.5740990000000  | -0.2377010000000 |

|      |                  |                  |                  |
|------|------------------|------------------|------------------|
| H47  | 0.3253210000000  | 1.1057690000000  | -1.7519530000000 |
| H48  | -0.3581000000000 | 1.8483380000000  | -0.4229740000000 |
| H49  | -1.7681060000000 | -0.2489280000000 | -2.1622540000000 |
| H50  | -4.4247840000000 | 2.0556570000000  | -1.4716130000000 |
| H51  | -4.5611180000000 | 0.4140680000000  | -2.0846880000000 |
| H52  | -5.1338000000000 | 0.7963780000000  | -0.4789920000000 |
| H53  | -2.9066990000000 | 1.6264460000000  | -3.3153150000000 |
| H54  | -1.2094570000000 | 1.5015070000000  | -3.5800830000000 |
| H55  | -2.5381280000000 | 3.6277380000000  | -1.8021050000000 |
| H56  | -0.6129580000000 | 4.9606750000000  | -2.4685930000000 |
| H57  | 0.0836640000000  | 3.5208070000000  | -3.3839750000000 |
| H58  | 1.6007750000000  | -0.9322710000000 | 2.3638540000000  |
| H59  | 3.9123720000000  | -2.8662670000000 | -0.5676400000000 |
| H60  | 3.5265490000000  | -1.0902010000000 | -0.8657870000000 |
| H61  | 3.4151770000000  | -2.8920840000000 | 2.8276960000000  |
| H62  | 1.8275770000000  | -3.3478610000000 | 2.2053410000000  |
| H63  | 3.2855510000000  | -3.9654150000000 | 1.4398610000000  |
| H64  | 4.0196270000000  | 0.6643900000000  | 1.4243790000000  |
| H65  | 4.0766050000000  | -0.4338570000000 | 2.7677630000000  |
| H66  | 2.6054010000000  | 0.9651380000000  | 4.1369940000000  |
| H67  | 2.6500970000000  | 3.3401680000000  | 3.6320300000000  |
| H68  | 3.3181020000000  | 2.9865610000000  | 1.9478680000000  |
| Sn69 | -2.4245440000000 | 0.0980470000000  | 3.9271890000000  |
| Cl72 | 0.0862020000000  | -0.1266750000000 | 4.3631470000000  |
| Cl73 | -3.0080270000000 | -0.6543320000000 | 6.0320810000000  |
| Cl74 | -2.0702020000000 | 2.4576740000000  | 3.5823320000000  |
| Cl75 | -4.4859240000000 | -0.2087620000000 | 2.7828710000000  |
| H74  | -3.5079040000000 | 1.5645960000000  | 1.1035460000000  |
| H75  | -2.3330180000000 | 2.3572870000000  | 0.1940170000000  |

SnCl<sub>4</sub>-9A-TS2

|     |                  |                  |                  |
|-----|------------------|------------------|------------------|
| C1  | -0.3852460000000 | -2.1990140000000 | -1.1034550000000 |
| C2  | -1.2104580000000 | -3.2202520000000 | -1.4120640000000 |
| C3  | -2.0508830000000 | -3.8433280000000 | -0.3942770000000 |
| C4  | -1.7128320000000 | -3.5958050000000 | 1.0351120000000  |
| C5  | -0.8486530000000 | -2.5837790000000 | 1.3507060000000  |
| C6  | -0.2349160000000 | -1.5932440000000 | 0.3110150000000  |
| O7  | -3.0189790000000 | -4.5134440000000 | -0.7234250000000 |
| H8  | -1.2968000000000 | -3.6204150000000 | -2.4120340000000 |
| O9  | 0.4516950000000  | -1.6000420000000 | -2.0191660000000 |
| C10 | 0.3673450000000  | -1.9901680000000 | -3.3877500000000 |
| C11 | -2.4457650000000 | -4.3968470000000 | 2.0736300000000  |
| O12 | -2.7243370000000 | -3.9119930000000 | 3.1599540000000  |
| C13 | -2.8304440000000 | -5.8059380000000 | 1.8251200000000  |
| C14 | -1.8579200000000 | -6.8213360000000 | 1.6703450000000  |
| C15 | -2.2674990000000 | -8.1591570000000 | 1.4966350000000  |
| C16 | -3.6364400000000 | -8.4842870000000 | 1.4634760000000  |
| C17 | -4.6044620000000 | -7.4744630000000 | 1.6066360000000  |
| C18 | -4.2048340000000 | -6.1395420000000 | 1.7972150000000  |
| O19 | -0.4146540000000 | -2.3012610000000 | 2.6246450000000  |
| C20 | 1.2939900000000  | -1.3098320000000 | 0.5075010000000  |
| C21 | -0.9922170000000 | -0.2184940000000 | 0.4047050000000  |

|      |                  |                  |                  |
|------|------------------|------------------|------------------|
| C22  | -2.1807510000000 | 0.0595680000000  | -0.5724950000000 |
| C23  | -3.4360280000000 | 0.6501070000000  | 0.0713670000000  |
| C24  | -4.7389290000000 | 0.2436510000000  | -0.5917750000000 |
| C25  | -3.4292480000000 | 1.4854170000000  | 1.1254740000000  |
| C26  | -1.7333750000000 | 0.9296230000000  | -1.7719150000000 |
| C27  | -1.3929450000000 | 2.3615130000000  | -1.3929390000000 |
| C28  | -0.1581570000000 | 2.8863440000000  | -1.4160790000000 |
| C29  | 1.7780420000000  | -0.6911680000000 | 1.8470860000000  |
| C30  | 2.2669140000000  | -1.8232060000000 | 2.7870500000000  |
| C31  | 1.9192900000000  | -2.7076950000000 | 3.1788520000000  |
| C32  | 2.7445420000000  | -1.3415650000000 | 4.1690130000000  |
| C33  | 2.8681630000000  | 0.3827470000000  | 1.5928160000000  |
| C34  | 2.9704740000000  | 1.4356230000000  | 2.6819200000000  |
| C35  | 4.1000140000000  | 1.7428650000000  | 3.3372760000000  |
| H36  | 1.0500600000000  | -1.3795970000000 | -3.9809470000000 |
| H37  | 0.6560410000000  | -3.0330970000000 | -3.5273440000000 |
| H38  | -0.6368760000000 | -1.8328300000000 | -3.7851860000000 |
| H39  | -0.7969070000000 | -6.6161680000000 | 1.6891820000000  |
| H40  | -1.5365050000000 | -8.9501290000000 | 1.3831470000000  |
| H41  | -3.9486970000000 | -9.5105380000000 | 1.3176810000000  |
| H42  | -5.6559840000000 | -7.7294600000000 | 1.5614550000000  |
| H43  | -4.9793150000000 | -5.3884610000000 | 1.8858480000000  |
| H44  | 0.8162270000000  | -2.5911660000000 | 2.9468700000000  |
| H45  | 1.5900130000000  | -0.6124010000000 | -0.2780810000000 |
| H46  | 1.8794180000000  | -2.1970870000000 | 0.2560790000000  |
| H47  | -0.2720860000000 | 0.5851610000000  | 0.2480350000000  |
| H48  | -1.3013680000000 | -0.0455460000000 | 1.4301450000000  |
| H49  | -2.5324520000000 | -0.8834940000000 | -0.9837920000000 |
| H50  | -4.7487730000000 | 0.5749120000000  | -1.6313560000000 |
| H51  | -4.8708660000000 | -0.8381890000000 | -0.5813430000000 |
| H52  | -5.6018180000000 | 0.6934500000000  | -0.0992010000000 |
| H53  | -4.3558810000000 | 1.8734320000000  | 1.5274310000000  |
| H54  | -2.5161940000000 | 1.8163350000000  | 1.5960750000000  |
| H55  | -2.5190410000000 | 0.9694580000000  | -2.5277450000000 |
| H56  | -0.8720540000000 | 0.4852660000000  | -2.2685450000000 |
| H57  | -2.2209740000000 | 2.9876490000000  | -1.0878080000000 |
| H58  | 0.0096530000000  | 3.9180380000000  | -1.1389710000000 |
| H59  | 0.7024330000000  | 2.3047940000000  | -1.7126950000000 |
| H60  | 0.9492420000000  | -0.1526280000000 | 2.3036810000000  |
| H61  | 2.1519790000000  | -0.5212890000000 | 4.5689820000000  |
| H62  | 2.7866570000000  | -2.1373170000000 | 4.9131660000000  |
| H63  | 3.7628160000000  | -0.9558180000000 | 4.1015380000000  |
| H64  | 2.6438690000000  | 0.9608490000000  | 0.6950730000000  |
| H65  | 3.8439060000000  | -0.0731360000000 | 1.4139980000000  |
| H66  | 2.0683950000000  | 1.9808630000000  | 2.9206400000000  |
| H67  | 4.1181280000000  | 2.5197670000000  | 4.0892620000000  |
| H68  | 5.0301080000000  | 1.2317480000000  | 3.1334200000000  |
| Sn69 | -1.5833050000000 | -2.5825750000000 | 4.3834160000000  |
| Cl72 | -0.5926150000000 | -4.6482380000000 | 4.9418960000000  |
| Cl73 | -3.5326960000000 | -2.5499300000000 | 5.7657450000000  |
| Cl74 | -0.2741900000000 | -0.9250970000000 | 5.4552850000000  |
| Cl75 | -3.1100630000000 | -1.1801720000000 | 3.0972080000000  |

H74 2.3107560000000 -3.3643670000000 3.9603300000000  
H75 2.0696200000000 -3.3301130000000 2.2873730000000

SnCl<sub>4</sub>(-)-8

C1 -1.8408264699815 1.9390034351428 -1.3379512121356  
C2 -1.4552376803146 0.4516131157535 -1.1970689164244  
C3 -1.5872934406807 2.7753184139349 -0.0892891329643  
C4 -1.9279484560748 -0.1297835726714 0.1621062682167  
C5 -2.1027137922815 -0.2695546867486 -2.3754201749126  
C6 0.0947725177119 0.2668984579085 -1.3046911612268  
O7 -1.7114979767714 0.7031875216725 1.2778342670668  
C8 -2.5090104618686 -1.3652393199210 0.2695830892823  
C9 -2.1976383466042 2.0668537049882 1.1508819494030  
C10 -1.8848768779173 2.9511941489001 2.3773328134222  
C11 -3.7424167744383 1.9896736399998 1.0649844358223  
C12 -0.0966340311482 3.2026789371077 0.0343737023379  
C13 -2.8232506403164 -1.3980926299296 -2.2623960056789  
O14 -1.8814769357198 0.3915549163499 -3.5661238158735  
C15 -3.0201648421113 -2.0458609093225 -0.9683380661524  
O16 -3.6672354987965 -3.0902861188131 -0.9688763254772  
C17 -2.6725873216415 -2.0324463642117 1.6030747560908  
O18 -2.4889644690398 -1.4189598653353 2.6337497195938  
C19 -2.9755279582206 -3.4855382918084 1.7414248248898  
C20 -2.1632740879845 -4.4744433831742 1.1389901088059  
C21 -4.0734097632858 -3.8814236442841 2.5370176085016  
C22 -4.3855486105697 -5.2465596436428 2.6909434909388  
C23 -3.5922957226829 -6.2250643119144 2.0624139847195  
C24 -2.4788108594521 -5.8395372923510 1.2912012103697  
C25 0.0899167236685 4.6617428031720 0.4058179785359  
C26 0.6316156777272 5.5842760311599 -0.4032127161795  
C27 0.6936973929491 -1.1741347636596 -1.3523864817989  
C28 2.1778006780836 -1.1592473020352 -0.9204825226883  
C29 0.5378184579251 -1.8872480725627 -2.6998114169326  
C30 2.7695590552254 -2.5498878964746 -0.7797566444511  
C31 3.1789622615526 -3.0868405772789 0.3796471791213  
C32 1.1093594909375 -1.1973571289688 -3.9272962063912  
C33 -0.0613536824790 -3.0866061146035 -2.7994581690402  
C34 -2.3793229527772 -0.1902106371330 -4.7641568146094  
Sn35 -1.2044460925045 -0.2211468622247 3.3130010455776  
Cl36 0.0447713300096 1.4467864730457 4.6449406388938  
Cl37 -0.9586286656158 -1.7520071897523 5.2138504371347  
Cl38 -3.1760981779392 0.5989145216210 4.5618657125587  
H39 -2.9016396612980 2.0081671597310 -1.5810887933520  
H40 -1.3391125967923 2.3926495773698 -2.1941244108574  
H41 -2.1490304094851 3.6978502963992 -0.2481628551331  
H42 0.5324422266748 0.7342407360275 -0.4279029536324  
H43 0.4778724744773 0.8485332067565 -2.1421796425172  
H44 -0.8238346174492 2.9704439402808 2.6144998717581  
H45 -2.1898178060900 3.9821394868634 2.1970328312130  
H46 -2.4183614132409 2.6592840551771 3.2738284698889  
H47 -4.1834767854023 2.9835633900685 0.9822380500954  
H48 -4.1042279072390 1.4108615151734 0.2172274882540

|      |                  |                  |                  |
|------|------------------|------------------|------------------|
| H49  | -4.1616856591612 | 1.5275647352991  | 1.9588396179479  |
| H50  | 0.4218523192729  | 3.0493119088768  | -0.9120480083102 |
| H51  | 0.4364792054332  | 2.5918714760148  | 0.7633375131216  |
| H52  | -3.2746142795704 | -1.8866547995974 | -3.1108875248072 |
| H53  | -1.3053418230133 | -4.1944030762185 | 0.5458694522380  |
| H54  | -4.6867506238143 | -3.1389117140515 | 3.0285275812550  |
| H55  | -5.2341704419396 | -5.5430870578312 | 3.2915935066172  |
| H56  | -3.8350579899070 | -7.2723718149704 | 2.1775932765959  |
| H57  | -1.8686019773107 | -6.5931758468991 | 0.8144424440693  |
| H58  | -0.2343106363997 | 4.9596651792461  | 1.3918321290260  |
| H59  | 0.7461862362467  | 6.6084299379276  | -0.0785128156549 |
| H60  | 0.9700366589941  | 5.3333254831538  | -1.3980839478275 |
| H61  | 0.1769310465181  | -1.7696138407611 | -0.6002981454232 |
| H62  | 2.2878208692626  | -0.6463109039883 | 0.0350705620441  |
| H63  | 2.7814593696438  | -0.5908918191039 | -1.6281750681303 |
| H64  | 2.8581555908157  | -3.1289438565903 | -1.6885184062882 |
| H65  | 3.5938692989089  | -4.0837801259438 | 0.4155506660341  |
| H66  | 3.1065906382341  | -2.5411545352379 | 1.3097352802994  |
| H67  | 0.6281543364190  | -0.2362762944184 | -4.1011715536245 |
| H68  | 2.1800808112724  | -1.0295263764597 | -3.8149489047837 |
| H69  | 0.9652330109511  | -1.8009512264954 | -4.8238139253844 |
| H70  | -0.1625949812531 | -3.5865557496855 | -3.7517805007502 |
| H71  | -0.4587455857235 | -3.5947589412192 | -1.9331794654028 |
| H72  | -2.0880316196474 | 0.4318444896317  | -5.6107696854193 |
| H73  | -1.9615281790418 | -1.1843320922578 | -4.9311105991974 |
| H74  | -3.4685015473557 | -0.2496427910009 | -4.7601153158664 |
| Cl75 | 0.5874311381569  | -0.4540290266261 | 2.2709832283111  |

SnCl<sub>4</sub>(+)-13

|     |                  |                  |                  |
|-----|------------------|------------------|------------------|
| C1  | -0.8753333868541 | 1.7868849175251  | 0.1816132823996  |
| C2  | -0.5600405435324 | 0.2831494017005  | 0.2631781399715  |
| C3  | -1.1355799105008 | -0.4717221884916 | -0.9779523647083 |
| O4  | -0.8974929727461 | 0.1577845274753  | -2.2231341354384 |
| C5  | -1.2901631167369 | 1.5726986132519  | -2.2746322088379 |
| C6  | -0.5171543447010 | 2.3639680264148  | -1.1812388940879 |
| C7  | -1.2008268394292 | -0.1901002032333 | 1.5665266167628  |
| C8  | -2.1022568249350 | -1.1823063022925 | 1.6447053356097  |
| C9  | -2.4971164064013 | -1.9495993559289 | 0.4644503211600  |
| C10 | -1.8685280701530 | -1.6262552864745 | -0.8614193079941 |
| C11 | -2.0768115591020 | -2.5605304114565 | -2.0273598624061 |
| O12 | -1.6252200183300 | -2.3248128891922 | -3.1348797128853 |
| C13 | -2.7060738677448 | -3.9039429900217 | -1.8805610362973 |
| C14 | -3.8137088107947 | -4.2328198022777 | -2.6936404927757 |
| C15 | -4.3842319128891 | -5.5194141590725 | -2.6317772539755 |
| C16 | -3.8426652651391 | -6.4876914260764 | -1.7651126240891 |
| C17 | -2.7236385535062 | -6.1753672259957 | -0.9666039215840 |
| C18 | -2.1488976660376 | -4.8904976231551 | -1.0337911529201 |
| O19 | -3.3802394686896 | -2.7894914644288 | 0.6226927333480  |
| C20 | -0.9434495981895 | 2.2414858419186  | -3.6289643335263 |
| C21 | -2.8309602583506 | 1.6822673395671  | -2.0865255006270 |
| C22 | -0.7069579922672 | 3.9068349598203  | -1.1921711867421 |
| C23 | 0.1853220107211  | 4.6208831723858  | -0.1951549973441 |

|      |                  |                  |                  |
|------|------------------|------------------|------------------|
| C24  | -0.2621101280886 | 5.4006197304816  | 0.8006945365105  |
| C25  | 1.0059369997172  | 0.1011227752862  | 0.3089087406695  |
| C26  | 1.7288085409028  | -0.8279598610398 | 1.3428127895350  |
| C27  | 3.2020351570601  | -0.3570510617963 | 1.4683079877607  |
| C28  | 4.0379675739238  | -1.1797461690189 | 2.4323911002455  |
| C29  | 5.1535368472234  | -1.8408581725775 | 2.0853643548552  |
| C30  | 1.6645129226034  | -2.3329360307372 | 1.0474536057267  |
| C31  | 0.7518888789241  | -3.1712799783639 | 1.9213247813158  |
| C32  | 2.4198315249661  | -2.9243922333737 | 0.1072925295193  |
| O33  | -0.7814776496121 | 0.5605314528167  | 2.6438354741115  |
| C34  | -1.2252917259290 | 0.1823159468305  | 3.9405903869699  |
| H35  | -0.3459847021650 | 2.3206756545729  | 0.9703824346923  |
| H36  | -1.9272858244204 | 1.9703519506204  | 0.3986607238407  |
| H37  | 0.5458025894848  | 2.1948018715305  | -1.3606939252775 |
| H38  | -2.5618521351223 | -1.4788703670773 | 2.5762049553125  |
| H39  | -4.2199393022299 | -3.5020301429663 | -3.3780399871065 |
| H40  | -5.2295222624611 | -5.7660978699714 | -3.2578172021555 |
| H41  | -4.2785050972154 | -7.4763818436466 | -1.7205398933912 |
| H42  | -2.3022197628309 | -6.9237787820374 | -0.3132271312533 |
| H43  | -1.2781809691400 | -4.6681892434920 | -0.4338076877371 |
| H44  | -1.4588572403513 | 3.1958254803825  | -3.7410411974051 |
| H45  | 0.1204448955387  | 2.4603709252640  | -3.7135905612496 |
| H46  | -1.2325497806947 | 1.6763332263416  | -4.5058931589196 |
| H47  | -3.1523973206809 | 2.7184117515151  | -1.9776889630895 |
| H48  | -3.3806438447083 | 1.2970393825839  | -2.9396898925931 |
| H49  | -3.2070389903911 | 1.1492620701538  | -1.2156200364448 |
| H50  | -1.7459347509066 | 4.1751555148432  | -1.0029938188221 |
| H51  | -0.4463253936915 | 4.3343038969069  | -2.1590803764637 |
| H52  | 1.2500420293897  | 4.4774336838863  | -0.3154571597234 |
| H53  | 0.4252784577448  | 5.8830834890646  | 1.4811907345800  |
| H54  | -1.3181423667328 | 5.5701375810675  | 0.9534770759620  |
| H55  | 1.4183597738630  | 1.0879589693100  | 0.5146575054763  |
| H56  | 1.3872932571210  | -0.1090795184887 | -0.6889523459997 |
| H57  | 1.3019929087546  | -0.6750563237404 | 2.3323963131076  |
| H58  | 3.2332952801535  | 0.6743447690503  | 1.8224088125593  |
| H59  | 3.6828167526257  | -0.3500713426742 | 0.4887284891874  |
| H60  | 3.6922279929491  | -1.2205239898376 | 3.4550096628666  |
| H61  | 5.7130023838795  | -2.4137318186637 | 2.8101155684663  |
| H62  | 5.5229779586173  | -1.8224626368287 | 1.0700656950011  |
| H63  | -0.2901962512446 | -3.0035577491361 | 1.6881077996543  |
| H64  | 0.9388191639778  | -4.2361736060077 | 1.7778753240802  |
| H65  | 0.9154690702098  | -2.9476680860870 | 2.9756845552242  |
| H66  | 2.3762691044088  | -3.9893625647650 | -0.0666022420792 |
| H67  | 3.0991127656384  | -2.3559191175920 | -0.5101927432640 |
| H68  | -0.7477111532766 | 0.8251956762850  | 4.6808376907615  |
| H69  | -2.3048410666204 | 0.3013805669980  | 4.0458123712222  |
| H70  | -0.9471664450654 | -0.8474976777756 | 4.1726993688663  |
| Sn71 | -0.3455371717523 | -1.1124033447613 | -3.9630909132588 |
| Cl72 | 0.1661093889741  | -2.9088675439404 | -5.5229741056269 |
| Cl73 | -2.6997109106446 | -0.4124134258402 | -4.7732715268905 |
| Cl74 | 1.4240043599574  | 0.3712484880344  | -4.7157305068770 |
| Cl75 | 1.1155832664949  | -2.0309660459719 | -2.5849919406208 |

BF<sub>2</sub>-9A

|     |                  |                  |                  |
|-----|------------------|------------------|------------------|
| C1  | -0.1014890000000 | -1.2607560000000 | -0.3973720000000 |
| C2  | -0.6668500000000 | -2.4790910000000 | -0.5411530000000 |
| C3  | -1.7079580000000 | -2.9556580000000 | 0.3774090000000  |
| C4  | -2.1465230000000 | -2.0494590000000 | 1.4718970000000  |
| C5  | -1.5287950000000 | -0.8597990000000 | 1.6497940000000  |
| C6  | -0.4734750000000 | -0.2607600000000 | 0.7042310000000  |
| O7  | -2.1419730000000 | -4.0971000000000 | 0.2305870000000  |
| H8  | -0.3884350000000 | -3.1557450000000 | -1.3316720000000 |
| O9  | 0.8479170000000  | -0.7409990000000 | -1.2547100000000 |
| C10 | 1.2176990000000  | -1.5043960000000 | -2.3947880000000 |
| C11 | -3.2529220000000 | -2.4239300000000 | 2.3961300000000  |
| O12 | -3.4885630000000 | -1.7774440000000 | 3.4166640000000  |
| C13 | -4.2585620000000 | -3.4973750000000 | 2.1636150000000  |
| C14 | -4.5406290000000 | -4.4501280000000 | 3.1714210000000  |
| C15 | -5.5171570000000 | -5.4433680000000 | 2.9623980000000  |
| C16 | -6.2237310000000 | -5.4937490000000 | 1.7461770000000  |
| C17 | -5.9552200000000 | -4.5485010000000 | 0.7394480000000  |
| C18 | -4.9805800000000 | -3.5548710000000 | 0.9482690000000  |
| O19 | -1.8062950000000 | -0.0724440000000 | 2.7465400000000  |
| C20 | 0.8037100000000  | 0.1829530000000  | 1.4844040000000  |
| C21 | -1.0567550000000 | 1.0176650000000  | 0.0141590000000  |
| C22 | -2.0946630000000 | 0.8309720000000  | -1.1395520000000 |
| C23 | -3.4904370000000 | 0.3744660000000  | -0.7163020000000 |
| C24 | -4.1887320000000 | -0.5602760000000 | -1.6854800000000 |
| C25 | -4.0869580000000 | 0.7636780000000  | 0.4234380000000  |
| C26 | -2.1713500000000 | 2.0772530000000  | -2.0459450000000 |
| C27 | -2.5488770000000 | 3.3491870000000  | -1.3102280000000 |
| C28 | -1.7820240000000 | 4.4489090000000  | -1.2587980000000 |
| C29 | 1.4833550000000  | -0.7907370000000 | 2.4920180000000  |
| C30 | 1.9095770000000  | -2.1273990000000 | 1.8911550000000  |
| C31 | 2.7098580000000  | -2.2183610000000 | 0.8152260000000  |
| C32 | 1.3983780000000  | -3.3622420000000 | 2.6045480000000  |
| C33 | 2.7169360000000  | -0.1397980000000 | 3.1591880000000  |
| C34 | 2.4166520000000  | 1.1672620000000  | 3.8659880000000  |
| C35 | 2.9903570000000  | 2.3396580000000  | 3.5529230000000  |
| H36 | 1.9454460000000  | -0.9415800000000 | -2.9795480000000 |
| H37 | 1.6826360000000  | -2.4487910000000 | -2.1105350000000 |
| H38 | 0.3585610000000  | -1.6984070000000 | -3.0378850000000 |
| H39 | -4.0054870000000 | -4.4406800000000 | 4.1117860000000  |
| H40 | -5.7226990000000 | -6.1727970000000 | 3.7332660000000  |
| H41 | -6.9675440000000 | -6.2596180000000 | 1.5825370000000  |
| H42 | -6.4930350000000 | -4.5870330000000 | -0.1975360000000 |
| H43 | -4.7856640000000 | -2.8401020000000 | 0.1606660000000  |
| H44 | 0.5231810000000  | 1.0784170000000  | 2.0409350000000  |
| H45 | 1.5542060000000  | 0.5297850000000  | 0.7738430000000  |
| H46 | -0.2118070000000 | 1.5528900000000  | -0.4244230000000 |
| H47 | -1.4359880000000 | 1.7089470000000  | 0.7679460000000  |
| H48 | -1.7188950000000 | 0.0531630000000  | -1.8027130000000 |
| H49 | -4.2903700000000 | -0.0877940000000 | -2.6624270000000 |
| H50 | -3.6185210000000 | -1.4805320000000 | -1.8113420000000 |

|     |                  |                  |                  |
|-----|------------------|------------------|------------------|
| H51 | -5.1874890000000 | -0.8257160000000 | -1.3391320000000 |
| H52 | -5.0776330000000 | 0.4277150000000  | 0.6890620000000  |
| H53 | -3.5971880000000 | 1.4351200000000  | 1.1134170000000  |
| H54 | -2.8955170000000 | 1.9159310000000  | -2.8452410000000 |
| H55 | -1.2088240000000 | 2.2227830000000  | -2.5391980000000 |
| H56 | -3.5030030000000 | 3.3458900000000  | -0.8029190000000 |
| H57 | -2.1053010000000 | 5.3272950000000  | -0.7201710000000 |
| H58 | -0.8216290000000 | 4.4890600000000  | -1.7507650000000 |
| H59 | 0.7613760000000  | -0.9962070000000 | 3.2841640000000  |
| H60 | 3.0134160000000  | -3.1737880000000 | 0.4137340000000  |
| H61 | 3.0747800000000  | -1.3315720000000 | 0.3166180000000  |
| H62 | 0.3106280000000  | -3.3590730000000 | 2.6519920000000  |
| H63 | 1.7136970000000  | -4.2758190000000 | 2.0993750000000  |
| H64 | -0.4353150000000 | -1.0362680000000 | 3.8747630000000  |
| H65 | 1.7855960000000  | -3.3874630000000 | 3.6230320000000  |
| H66 | 3.5004210000000  | 0.0297810000000  | 2.4181030000000  |
| H67 | 3.1396670000000  | -0.8243260000000 | 3.8954870000000  |
| H68 | 1.6889070000000  | 1.1248230000000  | 4.6650380000000  |
| H69 | 2.7396170000000  | 3.2443130000000  | 4.0856830000000  |
| H70 | 3.7172390000000  | 2.4133290000000  | 2.7568300000000  |
| H71 | -1.0534720000000 | 5.0945960000000  | -1.9088560000000 |
| B72 | -2.8249790000000 | -0.4566900000000 | 3.7739510000000  |
| F73 | -2.2543740350454 | -0.6570850737105 | 5.1902319708535  |
| F74 | -3.9479769323172 | 0.5963953068604  | 3.8125123859455  |

**BF<sub>2</sub>-9A-TS1**

|     |                  |                  |                  |
|-----|------------------|------------------|------------------|
| C1  | 0.5856870000000  | -1.4117740000000 | -1.0640430000000 |
| C2  | 0.1381500000000  | -2.6617030000000 | -0.8162170000000 |
| C3  | -0.7635560000000 | -2.9398410000000 | 0.3027560000000  |
| C4  | -1.2797940000000 | -1.8237430000000 | 1.1236980000000  |
| C5  | -0.7579530000000 | -0.5767260000000 | 0.9939110000000  |
| C6  | 0.2638570000000  | -0.2468420000000 | -0.1163510000000 |
| O7  | -1.0125880000000 | -4.1041330000000 | 0.5942010000000  |
| H8  | 0.4663560000000  | -3.4986550000000 | -1.4231990000000 |
| O9  | 1.4926680000000  | -1.1552330000000 | -2.0949320000000 |
| C10 | 1.0928160000000  | -1.7465540000000 | -3.3143780000000 |
| C11 | -2.3931520000000 | -1.9986080000000 | 2.1199010000000  |
| O12 | -2.6379160000000 | -1.1185110000000 | 3.0160190000000  |
| C13 | -3.3287960000000 | -3.1442470000000 | 2.0347140000000  |
| C14 | -3.7149690000000 | -3.8228610000000 | 3.2023210000000  |
| C15 | -4.6302230000000 | -4.8781680000000 | 3.1348790000000  |
| C16 | -5.1786380000000 | -5.2528000000000 | 1.9053170000000  |
| C17 | -4.8172160000000 | -4.5689130000000 | 0.7416580000000  |
| C18 | -3.9021060000000 | -3.5136460000000 | 0.8045200000000  |
| O19 | -1.3330690000000 | 0.4914430000000  | 1.7075580000000  |
| C20 | 1.6002050000000  | 0.2447650000000  | 0.5393470000000  |
| C21 | -0.2900500000000 | 0.9372500000000  | -0.9828420000000 |
| C22 | -1.6305930000000 | 0.7150200000000  | -1.7621260000000 |
| C23 | -2.9102670000000 | 0.4916940000000  | -0.8677560000000 |
| C24 | -4.2422890000000 | 0.6782390000000  | -1.6119630000000 |



|     |                 |                 |                 |
|-----|-----------------|-----------------|-----------------|
| C25 | -2.912155000000 | 1.278520000000  | 0.459361000000  |
| C26 | -1.783112000000 | 1.825495000000  | -2.839519000000 |
| C27 | -1.914366000000 | 3.210598000000  | -2.256444000000 |
| C28 | -0.921836000000 | 4.102510000000  | -2.327823000000 |
| C29 | 2.236477000000  | -0.681279000000 | 1.622934000000  |
| C30 | 2.813697000000  | -1.974476000000 | 1.061241000000  |
| C31 | 3.701068000000  | -1.970393000000 | 0.050076000000  |
| C32 | 2.513392000000  | -3.265968000000 | 1.778727000000  |
| C33 | 3.339044000000  | 0.063171000000  | 2.409233000000  |
| C34 | 2.760334000000  | 1.126357000000  | 3.307859000000  |
| C35 | 3.066509000000  | 2.418888000000  | 3.163477000000  |
| H36 | 1.563756000000  | -1.185124000000 | -4.146627000000 |
| H37 | 1.457270000000  | -2.793737000000 | -3.373658000000 |
| H38 | -0.008647000000 | -1.706462000000 | -3.472615000000 |
| H39 | -3.301090000000 | -3.541125000000 | 4.162808000000  |
| H40 | -4.917219000000 | -5.403342000000 | 4.036535000000  |
| H41 | -5.888589000000 | -6.068228000000 | 1.855447000000  |
| H42 | -5.251099000000 | -4.852245000000 | -0.208617000000 |
| H43 | -3.649084000000 | -2.980155000000 | -0.103083000000 |
| H45 | 1.412145000000  | 1.232203000000  | 1.009402000000  |
| H46 | 2.347270000000  | 0.468949000000  | -0.250711000000 |
| H47 | 0.496612000000  | 1.197689000000  | -1.726480000000 |
| H48 | -0.385633000000 | 1.853846000000  | -0.363649000000 |
| H49 | -1.508555000000 | -0.222997000000 | -2.345174000000 |
| H50 | -4.435233000000 | 1.747134000000  | -1.836280000000 |
| H51 | -4.240406000000 | 0.094362000000  | -2.556897000000 |
| H52 | -5.081383000000 | 0.302855000000  | -0.987734000000 |
| H53 | -2.655412000000 | 1.627705000000  | -3.494912000000 |
| H54 | -0.904049000000 | 1.781698000000  | -3.521095000000 |
| H55 | -2.846970000000 | 3.505185000000  | -1.787712000000 |
| H56 | -1.053472000000 | 5.094596000000  | -1.908856000000 |
| H57 | 0.027000000000  | 3.852226000000  | -2.792853000000 |
| H58 | 1.445962000000  | -0.952669000000 | 2.355461000000  |
| H59 | 4.147910000000  | -2.893320000000 | -0.306305000000 |
| H60 | 4.012129000000  | -1.048335000000 | -0.427839000000 |
| H61 | 2.967879000000  | -3.235861000000 | 2.790957000000  |
| H62 | 1.419071000000  | -3.393962000000 | 1.890921000000  |
| H63 | 2.913404000000  | -4.149202000000 | 1.235807000000  |
| H64 | 4.080953000000  | 0.495337000000  | 1.701129000000  |
| H65 | 3.884010000000  | -0.654959000000 | 3.060174000000  |
| H66 | 2.078982000000  | 0.830264000000  | 4.099932000000  |
| H67 | 2.632211000000  | 3.156231000000  | 3.830743000000  |
| H68 | 3.742901000000  | 2.753113000000  | 2.382551000000  |
| B68 | -1.782035000000 | 0.082632000000  | 3.044772000000  |
| F69 | -2.491819000000 | 1.135278000000  | 3.664709000000  |
| F70 | -0.669438000000 | -0.165477000000 | 3.884753000000  |
| H71 | -3.878250000000 | 1.138648000000  | 0.991685000000  |
| H72 | -2.758666000000 | 2.362912000000  | 0.288112000000  |
| H73 | -2.080556000000 | 0.863559000000  | 1.132385000000  |
| H74 | -2.911100000000 | -0.582112000000 | -0.589032000000 |

|     |                  |                  |                  |
|-----|------------------|------------------|------------------|
| C1  | -0.2776250000000 | -2.0178020000000 | -1.3673170000000 |
| C2  | -1.0729890000000 | -3.0588420000000 | -1.6925530000000 |
| C3  | -1.8075100000000 | -3.8065440000000 | -0.6693600000000 |
| C4  | -1.6365070000000 | -3.4573000000000 | 0.7576820000000  |
| C5  | -0.9534700000000 | -2.3405610000000 | 1.1103790000000  |
| C6  | -0.1642000000000 | -1.5035390000000 | 0.0818960000000  |
| O7  | -2.6321170000000 | -4.6431870000000 | -1.0190940000000 |
| H8  | -1.2147650000000 | -3.3385390000000 | -2.7314840000000 |
| O9  | 0.3444720000000  | -1.2604140000000 | -2.3603890000000 |
| C10 | 1.1156170000000  | -2.0705920000000 | -3.2224990000000 |
| C11 | -2.2391100000000 | -4.2685220000000 | 1.8686070000000  |
| O12 | -2.3794430000000 | -3.7926060000000 | 3.0468550000000  |
| C13 | -2.6109950000000 | -5.6889760000000 | 1.6749860000000  |
| C14 | -1.7338030000000 | -6.5841350000000 | 1.0364330000000  |
| C15 | -2.0809240000000 | -7.9327370000000 | 0.8989760000000  |
| C16 | -3.2959560000000 | -8.3998730000000 | 1.4071650000000  |
| C17 | -4.1602170000000 | -7.5220680000000 | 2.0666190000000  |
| C18 | -3.8170180000000 | -6.1738380000000 | 2.2088940000000  |
| O19 | -0.7856660000000 | -2.0101160000000 | 2.4619600000000  |
| C20 | 1.3697590000000  | -1.5717920000000 | 0.4320710000000  |
| C21 | -0.6930960000000 | -0.0313800000000 | 0.1086730000000  |
| C22 | -2.1517310000000 | 0.1474710000000  | -0.4399490000000 |
| C23 | -3.1744590000000 | 0.5273330000000  | 0.6268020000000  |
| C24 | -4.4769740000000 | -0.2320560000000 | 0.6654630000000  |
| C25 | -2.9772310000000 | 1.5519010000000  | 1.4771460000000  |
| C26 | -2.2240890000000 | 1.0831450000000  | -1.6684470000000 |
| C27 | -1.7755150000000 | 2.4947950000000  | -1.3847820000000 |
| C28 | -0.6521870000000 | 2.9970300000000  | -1.9067110000000 |
| C29 | 1.8525400000000  | -0.9208250000000 | 1.7837110000000  |
| C30 | 2.2150060000000  | -2.0145670000000 | 2.8516040000000  |
| C31 | 1.0314910000000  | -2.9824590000000 | 3.0780260000000  |
| C32 | 2.6438520000000  | -1.4086050000000 | 4.2018490000000  |
| C33 | 3.0339080000000  | 0.0586560000000  | 1.5124920000000  |
| C34 | 3.1042080000000  | 1.1737070000000  | 2.5260760000000  |
| C35 | 4.2412140000000  | 1.4905330000000  | 3.1526490000000  |
| H36 | 1.9226000000000  | -1.4478360000000 | -3.6593320000000 |
| H37 | 1.6067170000000  | -2.9201850000000 | -2.6951960000000 |
| H38 | 0.4909940000000  | -2.4407050000000 | -4.0626280000000 |
| H39 | -0.7789630000000 | -6.2423430000000 | 0.6547650000000  |
| H40 | -1.4053590000000 | -8.6179270000000 | 0.4032590000000  |
| H41 | -3.5670010000000 | -9.4405680000000 | 1.2912120000000  |
| H42 | -5.0956600000000 | -7.8859140000000 | 2.4722270000000  |
| H43 | -4.4946680000000 | -5.5062200000000 | 2.7243240000000  |
| H44 | 0.0586780000000  | -2.4762700000000 | 2.7624240000000  |
| H45 | 1.9339880000000  | -1.1258620000000 | -0.4148080000000 |
| H46 | 1.6832420000000  | -2.6386760000000 | 0.4019600000000  |
| H47 | 0.0138660000000  | 0.5998060000000  | -0.4735640000000 |
| H48 | -0.6475450000000 | 0.3640620000000  | 1.1393160000000  |
| H49 | -2.4931910000000 | -0.8331510000000 | -0.8296990000000 |
| H50 | -5.0075970000000 | -0.0965210000000 | -0.2999140000000 |
| H51 | -4.2729240000000 | -1.3138370000000 | 0.8090180000000  |
| H52 | -5.1432180000000 | 0.1099820000000  | 1.4873540000000  |

|     |                  |                  |                  |
|-----|------------------|------------------|------------------|
| H53 | -3.7270320000000 | 1.8197950000000  | 2.2152000000000  |
| H54 | -2.0688660000000 | 2.1437510000000  | 1.4510290000000  |
| H55 | -3.2704890000000 | 1.1216350000000  | -2.0423220000000 |
| H56 | -1.6150700000000 | 0.6406980000000  | -2.4876180000000 |
| H57 | -2.4099510000000 | 3.1412830000000  | -0.7873830000000 |
| H58 | -0.3803200000000 | 4.0304630000000  | -1.7172070000000 |
| H59 | 0.0034870000000  | 2.3887270000000  | -2.5225460000000 |
| H60 | 1.0350230000000  | -0.3158900000000 | 2.2153890000000  |
| H61 | 1.9171420000000  | -0.6401760000000 | 4.5400350000000  |
| H62 | 2.7193890000000  | -2.1937480000000 | 4.9850220000000  |
| H63 | 3.6559680000000  | -0.9643580000000 | 4.1228930000000  |
| H64 | 2.8931990000000  | 0.5710700000000  | 0.5371120000000  |
| H65 | 3.9923350000000  | -0.5046910000000 | 1.4483470000000  |
| H66 | 2.2109940000000  | 1.7574810000000  | 2.7296840000000  |
| H67 | 4.2553870000000  | 2.3068260000000  | 3.8675800000000  |
| H68 | 5.1576490000000  | 0.9410390000000  | 2.9648840000000  |
| H69 | 0.9506430000000  | -3.3330440000000 | 4.1298610000000  |
| H70 | 1.1633120000000  | -3.8853210000000 | 2.4421100000000  |
| H71 | 3.0747800000000  | -2.6108940000000 | 2.4756650000000  |
| B72 | -1.9308590000000 | -2.4089960000000 | 3.2888770000000  |
| F73 | -1.6071860000000 | -2.2731500000000 | 4.6572430000000  |
| F74 | -3.0102760000000 | -1.5263620000000 | 3.0726410000000  |

BF<sub>2</sub>(-)-8

|     |                  |                  |                  |
|-----|------------------|------------------|------------------|
| C1  | -1.8408264699815 | 1.9390034351428  | -1.3379512121356 |
| C2  | -1.4552376803146 | 0.4516131157535  | -1.1970689164244 |
| C3  | -1.5872934406807 | 2.7753184139349  | -0.0892891329643 |
| C4  | -1.9279484560748 | -0.1297835726714 | 0.1621062682167  |
| C5  | -2.1027137922815 | -0.2695546867486 | -2.3754201749126 |
| C6  | 0.0947725177119  | 0.2668984579085  | -1.3046911612268 |
| O7  | -1.7114979767714 | 0.7031875216725  | 1.2778342670668  |
| C8  | -2.5090104618686 | -1.3652393199210 | 0.2695830892823  |
| C9  | -2.1976383466042 | 2.0668537049882  | 1.1508819494030  |
| C10 | -1.8848768779173 | 2.9511941489001  | 2.3773328134222  |
| C11 | -3.7424167744383 | 1.9896736399998  | 1.0649844358223  |
| C12 | -0.0966340311482 | 3.2026789371077  | 0.0343737023379  |
| C13 | -2.8232506403164 | -1.3980926299296 | -2.2623960056789 |
| O14 | -1.8814769357198 | 0.3915549163499  | -3.5661238158735 |
| C15 | -3.0201648421113 | -2.0458609093225 | -0.9683380661524 |
| O16 | -3.6672354987965 | -3.0902861188131 | -0.9688763254772 |
| C17 | -2.6725873216415 | -2.0324463642117 | 1.6030747560908  |
| O18 | -2.4889644690398 | -1.4189598653353 | 2.6337497195938  |
| C19 | -2.9755279582206 | -3.4855382918084 | 1.7414248248898  |
| C20 | -2.1632740879845 | -4.4744433831742 | 1.1389901088059  |
| C21 | -4.0734097632858 | -3.8814236442841 | 2.5370176085016  |
| C22 | -4.3855486105697 | -5.2465596436428 | 2.6909434909388  |
| C23 | -3.5922957226829 | -6.2250643119144 | 2.0624139847195  |
| C24 | -2.4788108594521 | -5.8395372923510 | 1.2912012103697  |

|     |                  |                  |                  |
|-----|------------------|------------------|------------------|
| C25 | 0.0899167236685  | 4.6617428031720  | 0.4058179785359  |
| C26 | 0.6316156777272  | 5.5842760311599  | -0.4032127161795 |
| C27 | 0.6936973929491  | -1.1741347636596 | -1.3523864817989 |
| C28 | 2.1778006780836  | -1.1592473020352 | -0.9204825226883 |
| C29 | 0.5378184579251  | -1.8872480725627 | -2.6998114169326 |
| C30 | 2.7695590552254  | -2.5498878964746 | -0.7797566444511 |
| C31 | 3.1789622615526  | -3.0868405772789 | 0.3796471791213  |
| C32 | 1.1093594909375  | -1.1973571289688 | -3.9272962063912 |
| C33 | -0.0613536824790 | -3.0866061146035 | -2.7994581690402 |
| C34 | -2.3793229527772 | -0.1902106371330 | -4.7641568146094 |
| B35 | -1.1387782539207 | 0.1743338719820  | 2.9566290378768  |
| F36 | -1.2069463225514 | 0.7948276695490  | 4.3144966151270  |
| F37 | 0.1088899026267  | -0.2560155311476 | 3.4672706011479  |
| H38 | -2.9016396612980 | 2.0081671597310  | -1.5810887933520 |
| H39 | -1.3391125967923 | 2.3926495773698  | -2.1941244108574 |
| H40 | -2.1490304094851 | 3.6978502963992  | -0.2481628551331 |
| H41 | 0.5324422266748  | 0.7342407360275  | -0.4279029536324 |
| H42 | 0.4778724744773  | 0.8485332067565  | -2.1421796425172 |
| H43 | -0.8238346174492 | 2.9704439402808  | 2.6144998717581  |
| H44 | -2.1898178060900 | 3.9821394868634  | 2.1970328312130  |
| H45 | -2.4183614132409 | 2.6592840551771  | 3.2738284698889  |
| H46 | -4.1834767854023 | 2.9835633900685  | 0.9822380500954  |
| H47 | -4.1042279072390 | 1.4108615151734  | 0.2172274882540  |
| H48 | -4.1616856591612 | 1.5275647352991  | 1.9588396179479  |
| H49 | 0.4218523192729  | 3.0493119088768  | -0.9120480083102 |
| H50 | 0.4364792054332  | 2.5918714760148  | 0.7633375131216  |
| H51 | -3.2746142795704 | -1.8866547995974 | -3.1108875248072 |
| H52 | -1.3053418230133 | -4.1944030762185 | 0.5458694522380  |
| H53 | -4.6867506238143 | -3.1389117140515 | 3.0285275812550  |
| H54 | -5.2341704419396 | -5.5430870578312 | 3.2915935066172  |
| H55 | -3.8350579899070 | -7.2723718149704 | 2.1775932765959  |
| H56 | -1.8686019773107 | -6.5931758468991 | 0.8144424440693  |
| H57 | -0.2343106363997 | 4.9596651792461  | 1.3918321290260  |
| H58 | 0.7461862362467  | 6.6084299379276  | -0.0785128156549 |
| H59 | 0.9700366589941  | 5.3333254831538  | -1.3980839478275 |
| H60 | -0.4353150000000 | -1.0362680000000 | 3.8747630000000  |
| H61 | 0.1769310465181  | -1.7696138407611 | -0.6002981454232 |
| H62 | 2.2878208692626  | -0.6463109039883 | 0.0350705620441  |
| H63 | 2.7814593696438  | -0.5908918191039 | -1.6281750681303 |
| H64 | 2.8581555908157  | -3.1289438565903 | -1.6885184062882 |
| H65 | 3.5938692989089  | -4.0837801259438 | 0.4155506660341  |
| H66 | 3.1065906382341  | -2.5411545352379 | 1.3097352802994  |
| H67 | 0.6281543364190  | -0.2362762944184 | -4.1011715536245 |
| H68 | 2.1800808112724  | -1.0295263764597 | -3.8149489047837 |
| H69 | 0.9652330109511  | -1.8009512264954 | -4.8238139253844 |
| H70 | -0.1625949812531 | -3.5865557496855 | -3.7517805007502 |
| H71 | -0.4587455857235 | -3.5947589412192 | -1.9331794654028 |
| H72 | -2.0880316196474 | 0.4318444896317  | -5.6107696854193 |
| H73 | -1.9615281790418 | -1.1843320922578 | -4.9311105991974 |
| H74 | -3.4685015473557 | -0.2496427910009 | -4.7601153158664 |

|     |                  |                  |                  |
|-----|------------------|------------------|------------------|
| C1  | -0.9109090000000 | 1.7894970000000  | -0.0255870000000 |
| C2  | -0.4228070000000 | 0.3423690000000  | 0.1681770000000  |
| C3  | -0.9140380000000 | -0.4217020000000 | -1.0667420000000 |
| O4  | -0.4706590000000 | 0.0746270000000  | -2.3516390000000 |
| C5  | -0.9568940000000 | 1.4315180000000  | -2.6029610000000 |
| C6  | -0.5569740000000 | 2.3846810000000  | -1.4028550000000 |
| C7  | -0.9972040000000 | -0.1140510000000 | 1.5227600000000  |
| C8  | -1.9249800000000 | -1.1005430000000 | 1.5856950000000  |
| C9  | -2.3358740000000 | -1.8428040000000 | 0.3954850000000  |
| C10 | -1.7362230000000 | -1.5277080000000 | -0.9150780000000 |
| C11 | -2.0239830000000 | -2.3509890000000 | -2.1178660000000 |
| O12 | -1.4254480000000 | -1.8988960000000 | -3.0573370000000 |
| C13 | -2.4697030000000 | -3.7598580000000 | -2.1335300000000 |
| C14 | -3.3301570000000 | -4.2033810000000 | -3.1491290000000 |
| C15 | -3.7269320000000 | -5.5439790000000 | -3.2026510000000 |
| C16 | -3.2546390000000 | -6.4521920000000 | -2.2502670000000 |
| C17 | -2.3832750000000 | -6.0214320000000 | -1.2465230000000 |
| C18 | -1.9881490000000 | -4.6828890000000 | -1.1907270000000 |
| O19 | -3.2620830000000 | -2.6409840000000 | 0.4821040000000  |
| C20 | -0.2510900000000 | 2.0233470000000  | -3.8765830000000 |
| C21 | -2.5075800000000 | 1.4581100000000  | -2.8012600000000 |
| C22 | -1.1736410000000 | 3.8186470000000  | -1.4807470000000 |
| C23 | -0.3158500000000 | 4.8151170000000  | -0.7433120000000 |
| C24 | -0.7252600000000 | 5.4137400000000  | 0.3776820000000  |
| C25 | 1.1474490000000  | 0.3111620000000  | 0.2213120000000  |
| C26 | 1.8171430000000  | -0.9209540000000 | 0.8980970000000  |
| C27 | 3.3536450000000  | -0.7442130000000 | 0.9050090000000  |
| C28 | 4.0345640000000  | -1.8078590000000 | 1.7271280000000  |
| C29 | 4.7996320000000  | -2.7505590000000 | 1.1697530000000  |
| C30 | 1.4401640000000  | -2.2540760000000 | 0.2640160000000  |
| C31 | 0.9676730000000  | -3.3710710000000 | 1.1599000000000  |
| C32 | 1.6725600000000  | -2.4968210000000 | -1.0364410000000 |
| O33 | -0.6064910000000 | 0.6505430000000  | 2.6344560000000  |
| C34 | -0.8018630000000 | 0.0152870000000  | 3.8798290000000  |
| H35 | -0.4797820000000 | 2.4428240000000  | 0.7651110000000  |
| H36 | -2.0147090000000 | 1.8198040000000  | 0.1129660000000  |
| H37 | 0.5519530000000  | 2.4874280000000  | -1.4354240000000 |
| H38 | -2.4102820000000 | -1.3744790000000 | 2.5154290000000  |
| H39 | -3.6970160000000 | -3.5100680000000 | -3.8961270000000 |
| H40 | -4.4012940000000 | -5.8781410000000 | -3.9797360000000 |
| H41 | -3.5563850000000 | -7.4912070000000 | -2.2922900000000 |
| H42 | -2.0154230000000 | -6.7212820000000 | -0.5068420000000 |
| H43 | -1.2999550000000 | -4.3696860000000 | -0.4209830000000 |
| H44 | 0.0413820000000  | 3.0858420000000  | -3.7858560000000 |
| H45 | 0.7005570000000  | 1.4913280000000  | -4.0781820000000 |
| H46 | -0.8945020000000 | 1.9640970000000  | -4.7789940000000 |
| H47 | -2.8511700000000 | 2.4609910000000  | -3.1325390000000 |
| H48 | -2.8482160000000 | 0.7382860000000  | -3.5685470000000 |
| H49 | -3.0418370000000 | 1.2054390000000  | -1.8641680000000 |
| H50 | -2.2098140000000 | 3.8161990000000  | -1.0750950000000 |
| H51 | -1.2756150000000 | 4.1833820000000  | -2.5192540000000 |
| H52 | 0.6676340000000  | 5.0546430000000  | -1.1376530000000 |

|     |                 |                 |                 |
|-----|-----------------|-----------------|-----------------|
| H53 | -0.081745000000 | 6.133258000000  | 0.873054000000  |
| H54 | -1.693285000000 | 5.186363000000  | 0.812982000000  |
| H55 | 1.490303000000  | 1.201226000000  | 0.792392000000  |
| H56 | 1.570892000000  | 0.439180000000  | -0.798911000000 |
| H57 | 1.496450000000  | -0.929017000000 | 1.963063000000  |
| H58 | 3.618156000000  | 0.239519000000  | 1.348915000000  |
| H59 | 3.743179000000  | -0.741573000000 | -0.137325000000 |
| H60 | 3.897546000000  | -1.804634000000 | 2.804516000000  |
| H61 | 5.280125000000  | -3.498244000000 | 1.792009000000  |
| H62 | 4.945982000000  | -2.794126000000 | 0.095414000000  |
| H63 | 0.014933000000  | -3.087550000000 | 1.647722000000  |
| H64 | 0.814124000000  | -4.320343000000 | 0.603580000000  |
| H65 | 1.723249000000  | -3.560708000000 | 1.949606000000  |
| H66 | 1.462385000000  | -3.467309000000 | -1.474572000000 |
| H67 | 2.099305000000  | -1.733920000000 | -1.678228000000 |
| H68 | -0.214284000000 | 0.563469000000  | 4.645353000000  |
| H69 | -1.867957000000 | 0.075852000000  | 4.184736000000  |
| H70 | -0.435315000000 | -1.036268000000 | 3.874763000000  |
| B71 | -0.561315000000 | -0.911620000000 | -3.495736000000 |
| F72 | 0.710342000000  | -1.428930000000 | -3.817637000000 |
| F73 | -1.117420000000 | -0.395179000000 | -4.686213000000 |
| H74 | 0.502910000000  | -1.348998000000 | -3.756380000000 |
